# Supplementary material for: Virtual screening in the design of ionic liquids as environmentally safe bactericides
Source: Royal Society of Chemistry journal article supplement (doi:10.1039/c8gc03400a), 2019-01-01
Supplement: c8gc03400a1.xlsx [file c8gc03400a1.xlsx]

## Sheet: Table 1S
Table 1S	List of the created anions
ID	Anion
A1	tetrafluoroborate
A2	hexafluorophosphate
A3	bis(trifluoromethylsulfonyl)imide
A4	ethylsulfate
A5	trifluoroacetate
A6	triflate
A7	trifluoromethanesulfonate
A8	dicyanamide
A9	2-(2-methoxyethoxy)ethylsulfate
A10	methoxyacetate
A11	dodecylsulfate
A12	hydrogensulfate
A13	toluene-4-sulfonate
A14	thiocyanate
A15	1-methanesulfonate
A16	bis[12-benzenediolato]borate
A17	bis(pentafluoroethyl)phosphinate
A18	bis[oxalato(2-)]-borate
A19	tetracyanoborate
A20	1,2-benzisothiazolonium 1,1-dioxide
A21	trifluoridotris(pentafluoroethyl)phosphate
A22	trifluoridotris(heptafluoropropyl)phosphate
A23	tetracarbonylcobaltate
A24	bis(trifluoromethyl)amide
A25	2-hydroxypropanoate
A26	o-ethylsulfate
A27	acetate
A28	4-methylbenzenesulfonate
A29	o-octylsulfate
A30	tris(trifluoromethylsulfonyl)methanide
A31	sulfamate
A32	hydroxyacetate
A33	formate
A34	l-asparaginate
A35	l-glutaminate
A36	l-glutamate
A37	l-histidinate
A38	l-aspartate
A39	l-methioninate
A40	l-threoninate
A41	l-serinate
A42	l-isoleucinate
A43	l-valinate
A44	l-alaninate
A45	glycinate
A46	l-prolinate
A47	l-argininate
A48	l-lysinate
A49	methanesulfonate
A50	bis(2,4,4-trimethylpentyl)phosphinate
A51	decanoate
A52	tetracyanidoboranuide
A53	o-methylsulfate
A54	acesulfamate
A55	nitrate
A56	tricyanomethane
A57	sulfate
A58	triethyl-n-hexylboride
A59	2-(cyclohexylamino)ethanesulfonate
A60	2-[bis(2-hydroxyethyl)amino]ethanesulfonate
A61	2-hydroxy-4-morpholinopropanesulfonate
A62	benzoate
A63	2-oxopropanoate
A64	(2s)-2-hydroxybutanedioate
A65	taurinate
A66	threonate
A67	tetrachloroferrate
A68	diethylphosphate
A69	bis(fluorosulfonyl)imide
A70	cysteinate
A71	l-phenylalanine
A72	dicyclohexylphosphinate
A73	di(isobutyl)dithiobutylphosphinate
A74	docusate
A75	3,4,5-trihydroxybenzoate (gallate)
A76	heptafluorobutyrate
A77	mandelate
A78	tris(pentafluoroethyl)trifluorophosphate
A79	tetrachlorocobalte
A80	saccharinate
A81	salicylate
A82	stearate

## Sheet: Table 2S
Table 2S	List of the created cations
ID	Cation	Cation type
C1	1-ethyl-3-methylimidazolium	imidazolium
C2	1-methyl-3-propylimidazolium	imidazolium
C3	1-butyl-3-methylimidazolium	imidazolium
C4	1-pentyl-3-methylimidazolium	imidazolium
C5	1-hexyl-3-methylimidazolium	imidazolium
C6	1-heptyl-3-methylimidazolium	imidazolium
C7	3-methy-1-octylimidazolium	imidazolium
C8	3-methy-1-nonylimidazolium	imidazolium
C9	1-decyl-3-methylimidazolium	imidazolium
C10	1-dodecyl-3-methylimidazolium	imidazolium
C11	3-methyl-1-tetradecylimidazolium	imidazolium
C12	1-hexadecyl-3-methylimidazolium	imidazolium
C13	3-methy-1-octadecylimidazolium	imidazolium
C14	1-ethyl-3-propylimidazolium	imidazolium
C15	1-butyl-3-ethylimidazolium	imidazolium
C16	1-ethyl-3-pentylimidazolium	imidazolium
C17	1-ethyl-3-hexylimidazolium	imidazolium
C18	1-ethyl-3-heptylimidazolium	imidazolium
C19	1-ethyl-3-octylimidazolium	imidazolium
C20	1-ethyl-3-nonylimidazolium	imidazolium
C21	1-decyl-3-ethylimidazolium	imidazolium
C22	1-dodecyl-3-ethylimidazolium	imidazolium
C23	1-ethyl-3-tetradecylimidazolium	imidazolium
C24	1-ethyl-3-hexadecyllimidazolium	imidazolium
C25	1-ethyl-3-octadecylimidazolium	imidazolium
C26	1-butyl-3-propylimidazolium	imidazolium
C27	1-pentyl-3-propylimidazolium	imidazolium
C28	1-hexyl-3-propylimidazolium	imidazolium
C29	1-heptyl-3-propylimidazolium	imidazolium
C30	1-octyl-3-propylimidazolium	imidazolium
C31	1-nonyl-3-propylimidazolium	imidazolium
C32	1-decyl-3-propylimidazolium	imidazolium
C33	1-dodecyl-3-propylimidazolium	imidazolium
C34	3-propyl-1-tetradecylimidazolium	imidazolium
C35	1-hexadecyl-3-propylimidazolium	imidazolium
C36	3-propyl-1-octadecylimidazolium	imidazolium
C37	3-butyl-1-pentylimidazolium	imidazolium
C38	3-butyl-1-hexylimidazolium	imidazolium
C39	3-butyl-1-heptylimidazolium	imidazolium
C40	1-butyl-3-octylimidazolium	imidazolium
C41	1-butyl-3-nonylimidazolium	imidazolium
C42	1-decyl-3-butylimidazolium	imidazolium
C43	1-dodecyl-3-butylimidazolium	imidazolium
C44	1-butyl-3-tetradecylimidazolium	imidazolium
C45	1-butyl-3-hexadecylimidazolium	imidazolium
C46	1-butyl-3-octadecylimidazolium	imidazolium
C47	1-methylimidazolium	imidazolium
C48	1-ethylimidazolium	imidazolium
C49	1-propylimidazolium	imidazolium
C50	1-butylimidazolium	imidazolium
C51	1-pentylimidazolium	imidazolium
C52	1-hexylimidazolium	imidazolium
C53	1-heptylimidazolium	imidazolium
C54	1-octylimidazolium	imidazolium
C55	1-nonylimidazolium	imidazolium
C56	1-decylimidazolium	imidazolium
C57	1-dodecylimidazolium	imidazolium
C58	1-tetradecylimidazolium	imidazolium
C59	1-hexadecylimidazolium	imidazolium
C60	1-octadecylimidazolium	imidazolium
C61	1,3-dimethylimidazolium	imidazolium
C62	1,3-diethylimidazolium	imidazolium
C63	1,3-dipropylimidazolium	imidazolium
C64	1,3-dibutyllimidazolium	imidazolium
C65	1,3-dipentylimidazolium	imidazolium
C66	1,3-dihexylimidazolium	imidazolium
C67	1,3-diheptylimidazolium	imidazolium
C68	1,3-dioctylimidazolium	imidazolium
C69	1,3-dinonylimidazolium	imidazolium
C70	1,3-didecylimidazolium	imidazolium
C71	1,3-didodecylimidazolium	imidazolium
C72	1,3-ditetradecylimidazolium	imidazolium
C73	1,3-dihexadecylimidazolium	imidazolium
C74	1,3-dioctadecylimidazolium	imidazolium
C75	1-Benzyl-3-methylimidazolium	imidazolium
C76	1-benzyl-3-ethylimidazolium	imidazolium
C77	1-benzyl-3-propylimidazolium	imidazolium
C78	1-benzyl-3-butylimidazolium	imidazolium
C79	1-benzyl-3-pentylimidazolium	imidazolium
C80	1-benzyl-3-hexylimidazolium	imidazolium
C81	1-benzyl-3-heptylimidazolium	imidazolium
C82	1-benzyl-3-octylimidazolium	imidazolium
C83	1-benzyl-3-nonylimidazolium	imidazolium
C84	1-benzyl-3-decylimidazolium	imidazolium
C85	1-benzyl-3-dodecylimidazolium	imidazolium
C86	1-benzyl-3-tetradecylimidazolium	imidazolium
C87	1-benzyl-3-hexadecylimidazolium	imidazolium
C88	1-benzyl-3-octadecylimidazolium	imidazolium
C89	Trimethylsulfonium	sulfonium
C90	Triethylsulfonium	sulfonium
C91	Tripropylsulfonium	sulfonium
C92	Tributylsulfonium	sulfonium
C93	Tripentylsulfonium	sulfonium
C94	Trihexylsulfonium	sulfonium
C95	Triheptylsulfonium	sulfonium
C96	Trioctylsulfonium	sulfonium
C97	Trinonylsulfonium	sulfonium
C98	Tridecylsulfonium	sulfonium
C99	Tridodecylsulfonium	sulfonium
C100	Tritetradecylsulfonium	sulfonium
C101	Trihexadecylsulfonium	sulfonium
C102	Trioctadecylsulfonium	sulfonium
C103	heptyl(methyl)propylsulfonium	sulfonium
C104	ethylhexyltetradecylsulfonium	sulfonium
C105	butyl(dipropyl)sulfonium	sulfonium
C106	butyl(heptyl)propylsulfonium	sulfonium
C107	pentylnonyltetradecylsulfonium	sulfonium
C108	hexyl(dimethyl)sulfonium	sulfonium
C109	ethylheptyldodecylsulfonium	sulfonium
C110	methyl(octyl)propylsulfonium	sulfonium
C111	dinonyldecylsulfonium	sulfonium
C112	decylpentylheptylsulfonium	sulfonium
C113	dodecylhexylpentylsulfonium	sulfonium
C114	propylpentyltetradecylsulfonium	sulfonium
C115	ethylheptylhexadecylsulfonium	sulfonium
C116	diethyl(octyl)sulfonium	sulfonium
C117	diethyl(methyl)sulfonium	sulfonium
C118	methyl(dipropyl)sulfonium	sulfonium
C119	dibutyl(methyl)sulfonium	sulfonium
C120	methyl(dipentyl)sulfonium	sulfonium
C121	dihexyl(methyl)sulfonium	sulfonium
C122	diheptyl(methyl)sulfonium	sulfonium
C123	dioctyl(methyl)sulfonium	sulfonium
C124	dinonyl(methyl)sulfonium	sulfonium
C125	methyldidecylsulfonium	sulfonium
C126	methyldidodecylsulfonium	sulfonium
C127	methylditetradecylsulfonium	sulfonium
C128	methyldihexadecylsulfonium	sulfonium
C129	methyldioctadecylsulfonium	sulfonium
C130	1,1-dimethylpyrrolidinium	pyrrolidinium
C131	1,1-diethylpyrrolidinium	pyrrolidinium
C132	1,1-dipropylpyrrolidinium	pyrrolidinium
C133	1,1-dibutylpyrrolidinium	pyrrolidinium
C134	1,1-dipentylpyrrolidinium	pyrrolidinium
C135	1,1-dihexylpyrrolidinium	pyrrolidinium
C136	1,1-diheptylpyrrolidinium	pyrrolidinium
C137	1,1-dioctylpyrrolidinium	pyrrolidinium
C138	1,1-dinonylpyrrolidinium	pyrrolidinium
C139	1,1-didecylpyrrolidinium	pyrrolidinium
C140	1,1-didodecylpyrrolidinium	pyrrolidinium
C141	1,1-ditetradecylpyrrolidinium	pyrrolidinium
C142	1,1-dihexadecylpyrrolidinium	pyrrolidinium
C143	1,1-dioctadecylpyrrolidinium	pyrrolidinium
C144	1-Ethyl-1-methylpyrrolidinium	pyrrolidinium
C145	1-methyl-1-propylpyrrolidinium	pyrrolidinium
C146	1-Butyl-1-methylpyrrolidinium	pyrrolidinium
C147	1-methyl-1-pentylpyrrolidinium	pyrrolidinium
C148	1-Hexyl-1-methylpyrrolidinium	pyrrolidinium
C149	1-Heptyl-1-methylpyrrolidinium	pyrrolidinium
C150	1-methyl-1-octylpyrrolidinium	pyrrolidinium
C151	1-methy-1-nonylpyrrolidinium	pyrrolidinium
C152	1-decyl-1-methylpyrrolidinium	pyrrolidinium
C153	1-dodecyl-1-methylpyrrolidinium	pyrrolidinium
C154	1-methyl-1-tetradecylpyrrolidinium	pyrrolidinium
C155	1-hexadecyl-1-methylpyrrolidinium	pyrrolidinium
C156	1-methy-1-octadecylpyrrolidinium	pyrrolidinium
C157	1-ethyl-1-propylpyrrolidinium	pyrrolidinium
C158	1-butyl-1-ethylpyrrolidinium	pyrrolidinium
C159	1-ethyl-1-pentylpyrrolidinium	pyrrolidinium
C160	1-ethyl-1-hexylpyrrolidinium	pyrrolidinium
C161	1-ethyl-1-heptylpyrrolidinium	pyrrolidinium
C162	1-ethyl-1-octylpyrrolidinium	pyrrolidinium
C163	1-ethyl-1-nonylpyrrolidinium	pyrrolidinium
C164	1-decyl-1-ethylpyrrolidinium	pyrrolidinium
C165	1-dodecyl-1-ethylpyrrolidinium	pyrrolidinium
C166	1-ethyl-1-tetradecylpyrrolidinium	pyrrolidinium
C167	1-ethyl-1-hexadecylpyrrolidinium	pyrrolidinium
C168	1-ethyl-1-octadecylpyrrolidinium	pyrrolidinium
C169	1-butyl-1-propylpyrrolidinium	pyrrolidinium
C170	1-pentyl-1-propylpyrrolidinium	pyrrolidinium
C171	1-hexyl-1-propylpyrrolidinium	pyrrolidinium
C172	1-heptyl-1-propylpyrrolidinium	pyrrolidinium
C173	1-octyl-1-propylpyrrolidinium	pyrrolidinium
C174	1-propyl-1-nonylpyrrolidinium	pyrrolidinium
C175	1-decyl-1-propylpyrrolidinium	pyrrolidinium
C176	1-dodecyl-1-propylpyrrolidinium	pyrrolidinium
C177	1-tetradecyl-1-propylpyrrolidinium	pyrrolidinium
C178	1-hexadecyl-1-propylpyrrolidinium	pyrrolidinium
C179	1-octadecyl-1-propylpyrrolidinium	pyrrolidinium
C180	1-butyl-1-pentylpyrrolidinium	pyrrolidinium
C181	1-butyl-1-hexylpyrrolidinium	pyrrolidinium
C182	1-butyl-1-heptylpyrrolidinium	pyrrolidinium
C183	1-butyl-1-octylpyrrolidinium	pyrrolidinium
C184	1-butyl-1-nonylpyrrolidinium	pyrrolidinium
C185	1-decyl-1-butylpyrrolidinium	pyrrolidinium
C186	1-dodecyl-1-butylpyrrolidinium	pyrrolidinium
C187	1-butyl-1-tetradecylpyrrolidinium	pyrrolidinium
C188	1-butyl-1-hexadecylpyrrolidinium	pyrrolidinium
C189	1-butyl-1-octadecylpyrrolidinium	pyrrolidinium
C190	1-methylpyridinium	pyridinium
C191	1-ethylpyridinium	pyridinium
C192	1-propylpyridinium	pyridinium
C193	1-butylpyridinium	pyridinium
C194	1-pentylpyridinium	pyridinium
C195	1-hexylpyridinium	pyridinium
C196	1-heptylpyridinium	pyridinium
C197	1-octylpyridinium	pyridinium
C198	1-nonylpyridinium	pyridinium
C199	1-decylpyridinium	pyridinium
C200	1-dodecylpyridinium	pyridinium
C201	1-tetradecylpyridinium	pyridinium
C202	1-hexadecylpyridinium	pyridinium
C203	1-octadecylpyridinium	pyridinium
C204	1-methyl-3-propylpyridinium	pyridinium
C205	3-ethyl-5-propylpyridinium	pyridinium
C206	1-methyl-3,5-dipropylpyridinium	pyridinium
C207	3-butyl-5-propylpyridinium	pyridinium
C208	3-pentyl-1-propylpyridinium	pyridinium
C209	1-hexyl-3,5-dipropylpyridinium	pyridinium
C210	1-ethyl-3-heptylpyridinium	pyridinium
C211	1-butyl-3-octylpyridinium	pyridinium
C212	1-nonyl-3,5-dibutylpyridinium	pyridinium
C213	1-decyl-3-ethyl-5-propylpyridinium	pyridinium
C214	3-dodecyl-5-methylpyridinium	pyridinium
C215	3-hexyl-5-tetradecylpyridinium	pyridinium
C216	1,5-dihexyl-3-propylpyridinium	pyridinium
C217	1-pentyl-3-octadecylpyridinium	pyridinium
C218	1,3,5-trimethylpyridinium	pyridinium
C219	1,3,5-triethylpyridinium	pyridinium
C220	1,3,5-tripropylpyridinium	pyridinium
C221	1,3,5-tributylpyridinium	pyridinium
C222	1,3,5-tripentylpyridinium	pyridinium
C223	1,3,5-trihexylpyridinium	pyridinium
C224	1,3,5-triheptylpyridinium	pyridinium
C225	1,3,5-trioctylpyridinium	pyridinium
C226	1,3,5-trinonylpyridinium	pyridinium
C227	1,3,5-tridecylpyridinium	pyridinium
C228	1,3,5-tridodecylpyridinium	pyridinium
C229	1,3,5-tritetradecylpyridinium	pyridinium
C230	1,3,5-trihexadecylpyridinium	pyridinium
C231	1,3,5-trioctadecylpyridinium	pyridinium
C232	1,1-dimethylpiperidinium	piperidinium
C233	1,1-diethylpiperidinium	piperidinium
C234	1,1-dipropylpiperidinium	piperidinium
C235	1,1-dibutylpiperidinium	piperidinium
C236	1,1-dipentylpiperidinium	piperidinium
C237	1,1-dihexylpiperidinium	piperidinium
C238	1,1-diheptylpiperidinium	piperidinium
C239	1,1-dioctylpiperidinium	piperidinium
C240	1,1-dinonylpiperidinium	piperidinium
C241	1,1-didecylpiperidinium	piperidinium
C242	1,1-didodecylpiperidinium	piperidinium
C243	1,1-ditetradecylpiperidinium	piperidinium
C244	1,1-dihexadecylpiperidinium	piperidinium
C245	1,1-dioctadecylpiperidinium	piperidinium
C246	1-ethyl-1-methylpiperidinium	piperidinium
C247	1-methyl-1-propylpiperidinium	piperidinium
C248	1-butyl-1-methylpiperidinium	piperidinium
C249	1-pentyl-1-methylpiperidinium	piperidinium
C250	1-hexyl-1-methylpiperidinium	piperidinium
C251	1-heptyl-1-methylpiperidinium	piperidinium
C252	1-methyl-1-octylpiperidinium	piperidinium
C253	1-methyl-1-nonylpiperidinium	piperidinium
C254	1-decyl-1-methylpiperidinium	piperidinium
C255	1-dodecyl-1-methylpiperidinium	piperidinium
C256	1-methyl-1-tetradecylpiperidinium	piperidinium
C257	1-hexadecyl-1-methylpiperidinium	piperidinium
C258	1-methyl-1-octadecylpiperidinium	piperidinium
C259	1-ethyl-propylpiperidinium	piperidinium
C260	1-butyl-1-ethylpiperidinium	piperidinium
C261	1-ethyl-1-pentylpiperidinium	piperidinium
C262	1-ethyl-1-hexylpiperidinium	piperidinium
C263	1-ethyl-1-heptylpiperidinium	piperidinium
C264	1-ethyl-1-octylpiperidinium	piperidinium
C265	1-ethyl-1-nonylpiperidinium	piperidinium
C266	1-decyl-1-ethylpiperidinium	piperidinium
C267	1-dodecyl-1-ethylpiperidinium	piperidinium
C268	1-ethyl-1-tetradecylpiperidinium	piperidinium
C269	1-ethyl-1-hexadecylpiperidinium	piperidinium
C270	1-ethyl-1-octadecylpiperidinium	piperidinium
C271	1-butyl-1-propylpiperidinium	piperidinium
C272	1-pentyl-1-propylpiperidinium	piperidinium
C273	1-hexyl-1-propylpiperidinium	piperidinium
C274	1-heptyl-1-propylpiperidinium	piperidinium
C275	1-octyl-1-propylpiperidinium	piperidinium
C276	1-nonyl-1-propylpiperidinium	piperidinium
C277	1-decyl-1-propylpiperidinium	piperidinium
C278	1-dodecyl-1-propylpiperidinium	piperidinium
C279	1-propyl-1-tetradecylpiperidinium	piperidinium
C280	1-hexadecyl-1-propylpiperidinium	piperidinium
C281	1-octadecyl-1-propylpiperidinium	piperidinium
C282	1-butyl-1-pentylpiperidinium	piperidinium
C283	1-butyl-1-hexylpiperidinium	piperidinium
C284	1-butyl-1-heptylpiperidinium	piperidinium
C285	1-butyl-1-octylpiperidinium	piperidinium
C286	1-butyl-1-nonylpiperidinium	piperidinium
C287	1-decyl-1-butylpiperidinium	piperidinium
C288	1-dodecyl-1-butylpiperidinium	piperidinium
C289	1-butyl-1-tetradecylpiperidinium	piperidinium
C290	1-butyl-1-hexadecylpiperidinium	piperidinium
C291	1-butyl-1-octadecylpiperidinium	piperidinium
C292	1-carboxypropyl-3-methylimidazolium	imidazolium
C293	1-(triethoxysilylpropyl)-3-methylimidazolium	imidazolium
C294	3-(2-aminoethyl)-1-methyl-1H-imidazol-3-ium	imidazolium
C295	1-(2-aminoethyl)-1-methylpiperazin-1-ium	piperazinium
C296	dihydroxyethylammonium	ammonium
C297	3-(2-carboxyethyl)-1-ethyl-benzimidazolium	imidazolium
C298	1-[(S)-(2-Amino)propyl]-3-methylimidazolium	imidazolium
C299	1-[(S)-(2-Amino)isopentyl]-3-methylimidazolium	imidazolium
C300	1-[(S)-(2-Amino)isohexyl]-3-methylimidazolium	imidazolium
C301	1-[(S)-(2-Amino)-3-methylpentyl]-3-methylimidazolium	imidazolium
C302	1-methyl-3-(pyrrolidin-1-ylmethyl)-1H-imidazol-3-ium	imidazolium
C303	1-methyl-3-(12-sulfanyldodecyl)-1H-imidazol-3-ium	imidazolium
C304	1,3-di(2',3'-dimercaptoacetoxypropyl)imidazolium	imidazolium
C305	3-cyclohexyl-1-ethyl-1H-imidazol-3-ium	imidazolium
C306	1,3-dicyclohexyl-1H-imidazol-3-ium	imidazolium
C307	1-methyl-3-(2-phenylethyl)-1H-imidazol-3-ium	imidazolium
C308	3-[2-(diphenylphosphanyl)ethyl]-1-methyl-1H-imidazol-3-ium	imidazolium
C309	1-(methoxymethyl)-3-methyl-1H-imidazol-3-ium	imidazolium
C310	1-(2-methoxyethyl)-3-methyl-1H-imidazol-3-ium	imidazolium
C311	1-(3-methoxypropyl)-3-methyl-1H-imidazol-3-ium	imidazolium
C312	1-(3-carboxypropyl)-3-methyl-1H-imidazol-3-ium	imidazolium
C313	1-(carboxymethyl)-3-methyl-1H-imidazol-3-ium	imidazolium
C314	3-(3-methyl-1H-imidazol-3-ium-1-yl)propane-1-sulfonate	imidazolium
C315	3-methyl-1-(prop-2-yn-1-yl)-1H-imidazol-3-ium	imidazolium
C316	3-methyl-1-(prop-2-en-1-yl)-1H-imidazol-3-ium	imidazolium
C317	3-methyl-1-(3-sulfanylpropyl)-1H-imidazol-3-ium	imidazolium
C318	3-methyl-1-(12-sulfanyldodecyl)-1H-imidazol-3-ium	imidazolium
C319	3-methyl-1-[3,3,4,4-tetrafluoro-4-(pentafluoro-_6-sulfanyl)butyl]-1H-imidazol-3-ium	imidazolium
C320	1-[2-(cyclohexa-2,4-dien-1-yl)ethyl]-3-methyl-1H-imidazol-3-ium	imidazolium
C321	3-methyl-1-[2-(methylamino)ethyl]-1H-imidazol-3-ium	imidazolium
C322	1-[3-(dimethylphosphanyl)propyl]-3-methyl-1H-imidazol-3-ium	imidazolium
C323	1-(3-iminopropyl)-3-methyl-1H-imidazol-3-ium	imidazolium
C324	1-[2-(diethoxyphosphanyl)ethyl]-3-methyl-1H-imidazol-3-ium	imidazolium
C325	1-[3-(diethoxyphosphanyl)propyl]-3-methyl-1H-imidazol-3-ium	imidazolium
C326	1-(cyanomethyl)-3-methyl-1H-imidazol-3-ium	imidazolium
C327	1-(2-cyanoethyl)-3-methyl-1H-imidazol-3-ium	imidazolium
C328	1-(3-cyanopropyl)-3-methyl-1H-imidazol-3-ium	imidazolium
C329	1-(3,3-dimethylbutyl)-3-methyl-1H-imidazol-3-ium	imidazolium
C330	1-(3,3-diethylpentyl)-3-methyl-1H-imidazol-3-ium	imidazolium
C331	3-methyl-1-[3-(methylamino)-3-oxopropyl]-1H-imidazol-3-ium	imidazolium
C332	1-[3-(ethylamino)-3-oxopropyl]-3-methyl-1H-imidazol-3-ium	imidazolium
C333	1-(3-cyanopropyl)pyridinium	pyridinium
C334	1-[3,3,4,4-tetrafluoro-4-(pentafluoro-6-sulfanyl)butyl]pyridinium	pyridinium
C335	1-ethenyl-1-methyl-2-oxopyrrolidinium	pyrrolidinium
C336	1-ethenyl-1-ethyl-2-oxopyrrolidinium	pyrrolidinium
C337	1-ethenyl-2-oxo-1-propylpyrrolidinium	pyrrolidinium
C338	1-butyl-1-ethenyl-2-oxopyrrolidinium	pyrrolidinium
C339	2-methoxy-N,N,N-trimethylethanaminium	ammonium
C340	N,N,N-triethyl-2-methoxyethanaminium	ammonium
C341	N,N-diethyl-2-methoxy-N-methylethanaminium	ammonium
C342	N-ethyl-2-methoxy-N,N-dimethylethanaminium	ammonium
C343	1-(3-aminopropyl)-2,3-dimethylimidazolium	imidazolium
C344	1-allyl-3-(butyl-4-sulfonyl) imidazolium	imidazolium
C345	1-hexyl-3-pentylimidazolium	imidazolium
C346	1-heptyl-3-pentylimidazolium	imidazolium
C347	1-octyl-3-pentylimidazolium	imidazolium
C348	1-nonyl-3-pentylimidazolium	imidazolium
C349	1-decyl-3-pentylimidazolium	imidazolium
C350	1-dodecyl-3-pentylimidazolium	imidazolium
C351	1-pentyl-3-tetradecylimidazolium	imidazolium
C352	1-hexadecyl-3-pentylimidazolium	imidazolium
C353	1-octadecyl-3-pentylimidazolium	imidazolium
C354	1-heptyl-3-hexylimidazolium	imidazolium
C355	1-hexyl-3-octylimidazolium	imidazolium
C356	1-hexyl-3-nonylimidazolium	imidazolium
C357	1-decyl-3-hexylimidazolium	imidazolium
C358	1-dodecyl-3-hexylimidazolium	imidazolium
C359	1-hexyl-3-tetradecylimidazolium	imidazolium
C360	3-hexyl-1-hexadecylimidazolium	imidazolium
C361	1-hexyl-3-octadecylimidazolium	imidazolium
C362	1-heptyl-3-octylimidazolium	imidazolium
C363	1-heptyl-3-nonylimidazolium	imidazolium
C364	1-decyl-3-heptylimidazolium	imidazolium
C365	1-dodecyl-3-heptylimidazolium	imidazolium
C366	1-heptyl-3-tetradecylimidazolium	imidazolium
C367	1-heptyl-3-hexadecylimidazolium	imidazolium
C368	1-heptyl-3-octadecylimidazolium	imidazolium
C369	1-nonyl-3-octylimidazolium	imidazolium
C370	1-decyl-3-octylimidazolium	imidazolium
C371	1-dodecyl-3-octylimidazolium	imidazolium
C372	1-octyl-3-tetradecylimidazolium	imidazolium
C373	1-hexadecyl-3-octylimidazolium	imidazolium
C374	1-octyl-3-octadecylimidazolium	imidazolium
C375	1-decyl-3-nonylimidazolium	imidazolium
C376	1-dodecyl-3-nonylimidazolium	imidazolium
C377	1-nonyl-3-tetradecylimidazolium	imidazolium
C378	1-hexdecyl-3-nonylimidazolium	imidazolium
C379	1-nonyl-3-octadecylimidazolium	imidazolium
C380	1-decyl-3-dodecylimidazolium	imidazolium
C381	1-decyl-3-tetradecylimidazolium	imidazolium
C382	1-decyl-3-hexadecylimidazolium	imidazolium
C383	1-decyl-3-octadecylimidazolium	imidazolium
C384	1-dodecyl-3-tetradecylimidazolium	imidazolium
C385	1-dodecyl-3-hexadecylimidazolium	imidazolium
C386	1-dodecyl-3-octadecylimidazolium	imidazolium
C387	1-hexadecyl-3-tetradecylimidazolium	imidazolium
C388	1-octadecyl-3-tetradecylimidazolium	imidazolium
C389	1-hexadecyl-3-octadecylimidazolium	imidazolium
C390	1-hexyl-1-pentylpyrrolidinium	pyrrolidinium
C391	1-heptyl-1-pentylpyrrolidinium	pyrrolidinium
C392	1-octyl-1-pentylpyrrolidinium	pyrrolidinium
C393	1-nonyl-1-pentylpyrrolidinium	pyrrolidinium
C394	1-decyl-1-pentylpyrrolidinium	pyrrolidinium
C395	1-dodecyl-1-pentylpyrrolidinium	pyrrolidinium
C396	1-pentyl-1-tetradecylpyrrolidinium	pyrrolidinium
C397	1-hexadecyl-1-pentylpyrrolidinium	pyrrolidinium
C398	1-octadecyl-1-pentylpyrrolidinium	pyrrolidinium
C399	1-hexyl-1-heptylpyrrolidinium	pyrrolidinium
C400	1-hexyl-1-octylpyrrolidinium	pyrrolidinium
C401	1-hexyl-1-nonylpyrrolidinium	pyrrolidinium
C402	1-decyl-1-hexylpyrrolidinium	pyrrolidinium
C403	1-dodecyl-1-hexylpyrrolidinium	pyrrolidinium
C404	1-hexyl-1-tetradecylpyrrolidinium	pyrrolidinium
C405	1-hexyl-1-hexadecylpyrrolidinium	pyrrolidinium
C406	1-hexyl-1-octadecylpyrrolidinium	pyrrolidinium
C407	1-heptyl-1-nonylpyrrolidinium	pyrrolidinium
C408	1-decyl-1-heptylpyrrolidinium	pyrrolidinium
C409	1-dodecyl-1-heptylpyrrolidinium	pyrrolidinium
C410	1-heptyl-1-tetradecylpyrrolidinium	pyrrolidinium
C411	1-heptyl-1-hexadecylpyrrolidinium	pyrrolidinium
C412	1-heptyl-1-octadecylpyrrolidinium	pyrrolidinium
C413	1-nonyl-1-octylpyrrolidinium	pyrrolidinium
C414	1-decyl-1-octylpyrrolidinium	pyrrolidinium
C415	1-dodecyl-1-octylpyrrolidinium	pyrrolidinium
C416	1-octyl-1-tetradecylpyrrolidinium	pyrrolidinium
C417	1-hexadecyl-1-octylpyrrolidinium	pyrrolidinium
C418	1-octyl-1-octadecylpyrrolidinium	pyrrolidinium
C419	1-decyl-1-nonylpyrrolidinium	pyrrolidinium
C420	1-dodecyl-1-nonylpyrrolidinium	pyrrolidinium
C421	1-hexdecyl-1-nonylpyrrolidinium	pyrrolidinium
C422	1-nonyl-1-octadecylpyrrolidinium	pyrrolidinium
C423	1-decyl-1-dodecylpyrrolidinium	pyrrolidinium
C424	1-decyl-1-tetradecylpyrrolidinium	pyrrolidinium
C425	1-decyl-1-hexadecylpyrrolidinium	pyrrolidinium
C426	1-decyl-1-octadecylpyrrolidinium	pyrrolidinium
C427	1-dodecyl-1-octadecylpyrrolidinium	pyrrolidinium
C428	1-hexadecyl-1-tetradecylpyrrolidinium	pyrrolidinium
C429	1-octadecyl-1-tetradecylpyrrolidinium	pyrrolidinium
C430	1-hexadecyl-1-octadecylpyrrolidinium	pyrrolidinium
C431	1-hexyl-1-pentylpiperidinium	piperidinium
C432	1-heptyl-1-pentylpiperidinium	piperidinium
C433	1-octyl-1-pentylpiperidinium	piperidinium
C434	1-nonyl-1-pentylpiperidinium	piperidinium
C435	1-decyl-1-pentylpiperidinium	piperidinium
C436	1-dodecyl-1-pentylpiperidinium	piperidinium
C437	1-pentyl-1-tetradecylpiperidinium	piperidinium
C438	1-hexadecyl-1-pentylpiperidinium	piperidinium
C439	1-octadecyl-1-pentylpiperidinium	piperidinium
C440	1-hexyl-1-heptylpiperidinium	piperidinium
C441	1-hexyl-1-octylpiperidinium	piperidinium
C442	1-hexyl-1-nonylpiperidinium	piperidinium
C443	1-decyl-1-hexylpiperidinium	piperidinium
C444	1-dodecyl-1-hexylpiperidinium	piperidinium
C445	1-hexyl-1-tetradecylpiperidinium	piperidinium
C446	1-hexyl-1-hexadecylpiperidinium	piperidinium
C447	1-hexyl-1-octadecylpiperidinium	piperidinium
C448	1-heptyl-1-octylpiperidinium	piperidinium
C449	1-heptyl-1-nonylpiperidinium	piperidinium
C450	1-decyl-1-heptylpiperidinium	piperidinium
C451	1-dodecyl-1-heptylpiperidinium	piperidinium
C452	1-heptyl-1-tetradecylpiperidinium	piperidinium
C453	1-heptyl-1-hexadecylpiperidinium	piperidinium
C454	1-heptyl-1-octadecylpiperidinium	piperidinium
C455	1-nonyl-1-octylpiperidinium	piperidinium
C456	1-decyl-1-octylpiperidinium	piperidinium
C457	1-dodecyl-1-octylpiperidinium	piperidinium
C458	1-octyl-1-tetradecylpiperidinium	piperidinium
C459	1-hexadecyl-1-octylpiperidinium	piperidinium
C460	1-octyl-1-octadecylpiperidinium	piperidinium
C461	1-decyl-1-nonylpiperidinium	piperidinium
C462	1-dodecyl-1-nonylpiperidinium	piperidinium
C463	1-nonyl-1-tetradecylpiperidinium	piperidinium
C464	1-hexdecyl-1-nonylpiperidinium	piperidinium
C465	1-nonyl-1-octadecylpiperidinium	piperidinium
C466	1-decyl-1-dodecylpiperidinium	piperidinium
C467	1-decyl-1-tetradecylpiperidinium	piperidinium
C468	1-decyl-1-hexadecylpiperidinium	piperidinium
C469	1-decyl-1-octadecylpiperidinium	piperidinium
C470	1-dodecyl-1-hexadecylpiperidinium	piperidinium
C471	1-dodecyl-1-octadecylpiperidinium	piperidinium
C472	1-hexadecyl-1-tetradecylpiperidinium	piperidinium
C473	1-octadecyl-1-tetradecylpiperidinium	piperidinium
C474	1-hexadecyl-1-octadecylpiperidinium	piperidinium
C475	1,3-bis(2,3-dihydroxypropyl)-1H-imidazolium	imidazolium
C476	tetrametyloammonium	ammonium
C477	tetraetyloammonium	ammonium
C478	tetrapropyloammonium	ammonium
C479	tetrabutyloammonium	ammonium
C480	tetrahexyloammonium	ammonium
C481	1-metylo-trietyloammonium	ammonium
C482	1-metylo-tripropyloammonium	ammonium
C483	1-metylo-trioctyloammonium	ammonium
C484	1-metylo-tridecylammonium	ammonium
C485	1-metylo-tridodecylammonium	ammonium
C486	1-etylo-tripropyloammonium	ammonium
C487	1-etylo-tributyloammonium	ammonium
C488	1-etylo-tri(tetrahexylo)ammonium	ammonium
C489	1-propylo-tributyloammonium	ammonium
C490	1-propylo-tripentyloammonium	ammonium
C491	1-propylo-trinonylammonium	ammonium
C492	1-propylo-tridecylammonium	ammonium
C493	1-propylo-tridodecylammonium	ammonium
C494	1-propylo-tri(teradecylo)ammonium	ammonium
C495	1-propylo-tri(tetrahexylo)ammonium	ammonium
C496	1-propylo-tri(octadecylo)ammonium	ammonium
C497	1-butylo-tri(teradecylo)ammonium	ammonium
C498	1-pentylo-trioctyloammonium	ammonium
C499	1-pentylo-tridecylammonium	ammonium
C500	1-hexylo-tri(teradecylo)ammonium	ammonium
C501	1-octylo-tridodecyloammonium	ammonium
C502	1-octylo-tri(teradecylo)ammonium	ammonium
C503	1-octylo-tri(octadecylo)ammonium	ammonium
C504	1-nonyl-tridecyloammonium	ammonium
C505	1-nonyl-tridodecyloammonium	ammonium
C506	1-nonylo-tri(teradecylo)ammonium	ammonium
C507	1-nonylo-tri(tetrahexylo)ammonium	ammonium
C508	1-nonylo-tri(octadecylo)ammonium	ammonium
C509	1-decylo-tridodecyloammonium	ammonium
C510	1-decylo-tri(tetradecylo)ammonium	ammonium
C511	1-decylo-tri(hexadecylo)ammonium	ammonium
C512	1-dodecylo-tri(tetradecylo)ammonium	ammonium
C513	1-dodecylo-trihexadecyloammonium	ammonium
C514	1-dodecylo-trioctadecyloammonium	ammonium
C515	N,N-Diethyl-N-methyl-N-(2-methoxyethyl)ammonium	ammonium
C516	N,N-Dipropyl-N-methyl-N-(2-methoxyethyl)ammonium	ammonium
C517	N,N-Dibutyl-N-methyl-N-(2-methoxyethyl)ammonium	ammonium
C518	N,N-Dipentyl-N-methyl-N-(2-methoxyethyl)ammonium	ammonium
C519	N,N-Dihexyl-N-methyl-N-(2-methoxyethyl)ammonium	ammonium
C520	N,N-Diheptyl-N-methyl-N-(2-methoxyethyl)ammonium	ammonium
C521	N,N-Dioctyl-N-methyl-N-(2-methoxyethyl)ammonium	ammonium
C522	N,N-Dinonyl-N-methyl-N-(2-methoxyethyl)ammonium	ammonium
C523	N,N-Didecyl-N-methyl-N-(2-methoxyethyl)ammonium	ammonium
C524	N,N-Didodecyl-N-methyl-N-(2-methoxyethyl)ammonium	ammonium
C525	N,N-Ditetradecyl-N-methyl-N-(2-methoxyethyl)ammonium	ammonium
C526	N,N-Dihexadecyl-N-methyl-N-(2-methoxyethyl)ammonium	ammonium
C527	N,N-Dioctadecyl-N-methyl-N-(2-methoxyethyl)ammonium	ammonium
C528	methylammonium	ammonium
C529	ethylammonium	ammonium
C530	propylammonium	ammonium
C531	butylammonium	ammonium
C532	pentylammonium	ammonium
C533	hexylammonium	ammonium
C534	heptylammoniumammonium	ammonium
C535	octylammoniumammonium	ammonium
C536	nonylammoniumammonium	ammonium
C537	decylammoniumammonium	ammonium
C538	dodecylammonium	ammonium
C539	tetradecylammonium	ammonium
C540	hexadecylammonium	ammonium
C541	octadecylammonium	ammonium
C542	tetramethylphosphonium	phosphonium
C543	tetraethylphosphonium	phosphonium
C544	tetrapropylphosphonium	phosphonium
C545	tetrabutylphosphonium	phosphonium
C546	tetrapentylphosphonium	phosphonium
C547	tetrahexylphosphonium	phosphonium
C548	tetraheptylphosphonium	phosphonium
C549	tetraoctylphosphonium	phosphonium
C550	tetranonylphosphonium	phosphonium
C551	tetra(decyl)phosphonium	phosphonium
C552	tetradodecylphosphonium	phosphonium
C553	tetra(teradecyl)phosphonium	phosphonium
C554	tetra(tetrahexyl)phosphonium	phosphonium
C555	tetra(octadecyl)phosphonium	phosphonium
C556	triethyl(methyl)phosphonium	phosphonium
C557	methyl(tripropyl)phosphonium	phosphonium
C558	Tributyl(methyl)phosphonium	phosphonium
C559	tripentyl(methyl)phosphonium	phosphonium
C560	trihexyl(methyl)phosphonium	phosphonium
C561	triheptyl(methyl)phosphonium	phosphonium
C562	trioctyl(methyl)phosphonium	phosphonium
C563	trinonyl(methyl)phosphonium	phosphonium
C564	1-methyl-tridecylphosphonium	phosphonium
C565	1-methyl-tridodecylphosphonium	phosphonium
C566	1-methyl-tri(teradecyl)phosphonium	phosphonium
C567	1-methyl-tri(tetrahexyl)phosphonium	phosphonium
C568	1-methyl-tri(octadecyl)phosphonium	phosphonium
C569	ethyl(tripropyl)phosphonium	phosphonium
C570	Tributyl(ethyl)phosphonium	phosphonium
C571	tripentyl(ethyl)phosphonium	phosphonium
C572	trihexyl(ethyl)phosphonium	phosphonium
C573	triheptyl(ethyl)phosphonium	phosphonium
C574	trioctyl(ethyl)phosphonium	phosphonium
C575	1-ethyl-trinonylphosphonium	phosphonium
C576	1-ethyl-tridecylphosphonium	phosphonium
C577	1-ethyl-tridodecylphosphonium	phosphonium
C578	1-ethyl-tri(teradecyl)phosphonium	phosphonium
C579	1-ethyl-tri(tetrahexyl)phosphonium	phosphonium
C580	1-ethyl-tri(octadecylo)phosphonium	phosphonium
C581	tributyl(propyl)phosphonium	phosphonium
C582	tripentyl(propyl)phosphonium	phosphonium
C583	trihexyl(propyl)phosphonium	phosphonium
C584	triheptyl(propyl)phosphonium	phosphonium
C585	trioctyl(propyl)phosphonium	phosphonium
C586	1-propyl-trinonylphosphonium	phosphonium
C587	tridecyl(propyl)phosphonium	phosphonium
C588	1-propyl-tridodecylphosphonium	phosphonium
C589	1-propyl-tri(teradecylo)phosphonium	phosphonium
C590	1-propyl-tri(hexadecyl)phosphonium	phosphonium
C591	tripentyl(butyl)phosphonium	phosphonium
C592	trihexyl(butyl)phosphonium	phosphonium
C593	triheptyl(butyl)phosphonium	phosphonium
C594	trioctyl(butyl)phosphonium	phosphonium
C595	1-butyl-trinonylphosphonium	phosphonium
C596	tridecyl(butyl)phosphonium	phosphonium
C597	1-butyl-tri(hexadecylo)phosphonium	phosphonium
C598	1-butyl-tri(octadecyl)phosphonium	phosphonium
C599	trihexyl(pentyl)phosphonium	phosphonium
C600	triheptyl(pentyl)phosphonium	phosphonium
C601	trioctyl(pentyl)phosphonium	phosphonium
C602	1-pentyl-trinonylphosphonium	phosphonium
C603	tridecyl(pentyl)phosphonium	phosphonium
C604	1-pentyl-tridodecylphosphonium	phosphonium
C605	1-pentyl-tri(hexadecyl)phosphonium	phosphonium
C606	triheptyl(hexyl)phosphonium	phosphonium
C607	1-hexyl-trioctylphosphonium	phosphonium
C608	1-hexyl-trinonylphosphonium	phosphonium
C609	tridecyl(hexyl)phosphonium	phosphonium
C610	1-hexyl-tridodecylphosphonium	phosphonium
C611	1-hexyl-tri(teradecyl)phosphonium	phosphonium
C612	1-hexyl-tri(hexadecyl)phosphonium	phosphonium
C613	1-heptyl-trioctylphosphonium	phosphonium
C614	1-heptyl-trinonylphosphonium	phosphonium
C615	1-heptyl-tridecylphosphonium	phosphonium
C616	1-heptyl-tridodecylphosphonium	phosphonium
C617	1-heptyl-tri(teradecylo)phosphonium	phosphonium
C618	1-heptyl-tri(tetrahexyl)phosphonium	phosphonium
C619	1-heptyl-tri(octadecylo)phosphonium	phosphonium
C620	1-octylo-trinonylphosphonium	phosphonium
C621	1-octylo-tridecylphosphonium	phosphonium
C622	1-octylo-tridodecylphosphonium	phosphonium
C623	1-octylo-tri(teradecylo)phosphonium	phosphonium
C624	1-octylo-tri(hexadecylo)phosphonium	phosphonium
C625	1-octylo-tri(octadecylo)phosphonium	phosphonium
C626	1-nonyl-tridecylphosphonium	phosphonium
C627	1-nonyl-tridodecylphosphonium	phosphonium
C628	1-nonylo-tri(teradecylo)phosphonium	phosphonium
C629	1-nonylo-tri(hexadecylo)phosphonium	phosphonium
C630	1-nonylo-tri(octadecylo)phosphonium	phosphonium
C631	1-decylo-tridodecylphosphonium	phosphonium
C632	1-decylo-tri(tetradecylo)phosphonium	phosphonium
C633	1-decylo-tri(hexadecylo)phosphonium	phosphonium
C634	1-decylo-trioctadecylphosphonium	phosphonium
C635	1-dodecyl-tri(tetradecylo)phosphonium	phosphonium
C636	1-dodecyl-trihexadecylphosphonium	phosphonium
C637	1-dodecyl-trioctadecylphosphonium	phosphonium
C638	1-tetradecylo-trihexadecylphosphonium	phosphonium
C639	1-tetradecylo-trioctadecylphosphonium	phosphonium
C640	1-hexadecylo-trioctadecylphosphonium	phosphonium
C641	diethyl(2-methoxyethyl)methylphosphonium	phosphonium
C642	(2-methoxyethyl)(methyl)dipropylphosphonium	phosphonium
C643	N,N-Dibutyl-N-methyl-N-(2-methoxyethyl)phosphonium	phosphonium
C644	N,N-Dipentyl-N-methyl-N-(2-methoxyethyl)phosphonium	phosphonium
C645	N,N-Dihexyl-N-methyl-N-(2-methoxyethyl)phosphonium	phosphonium
C646	N,N-Diheptyl-N-methyl-N-(2-methoxyethyl)phosphonium	phosphonium
C647	N,N-Dioctyl-N-methyl-N-(2-methoxyethyl)phosphonium	phosphonium
C648	N,N-Dinonyl-N-methyl-N-(2-methoxyethyl)phosphonium	phosphonium
C649	N,N-Didecyl-N-methyl-N-(2-methoxyethyl)phosphonium	phosphonium
C650	N,N-Didodecyl-N-methyl-N-(2-methoxyethyl)phosphonium	phosphonium
C651	N,N-Ditetradecyl-N-methyl-N-(2-methoxyethyl)phosphonium	phosphonium
C652	N,N-Dihexadecyl-N-methyl-N-(2-methoxyethyl)phosphonium	phosphonium
C653	N,N-Dioctadecyl-N-methyl-N-(2-methoxyethyl)phosphonium	phosphonium
C654	methylphosphonium	phosphonium
C655	ethylphosphonium	phosphonium
C656	propylphosphonium	phosphonium
C657	butylphosphonium	phosphonium
C658	pentylphosphonium	phosphonium
C659	hexylphosphonium	phosphonium
C660	heptylphosphonium	phosphonium
C661	octylphosphonium	phosphonium
C662	nonylphosphonium	phosphonium
C663	decylphosphonium	phosphonium
C664	dodecylphosphonium	phosphonium
C665	tetradecylphosphonium	phosphonium
C666	hexadecylphosphonium	phosphonium
C667	octadecylphosphonium	phosphonium
C668	4,4-dimethylmorpholin-4-ium	morpholinium
C669	4-ethyl-4-methylmorpholin-4-ium	morpholinium
C670	4-methyl-4-propylmorpholin-4-ium	morpholinium
C671	4-butyl-4-methylmorpholin-4-ium	morpholinium
C672	4-methyl-4-pentylmorpholin-4-ium	morpholinium
C673	4-hexyl-4-methylmorpholin-4-ium	morpholinium
C674	4-heptyl-4-methylmorpholin-4-ium	morpholinium
C675	4-methyl-4-octylmorpholin-4-ium	morpholinium
C676	4-(2-methoxyethyl)-4-methylmorpholin-4-ium	morpholinium
C677	4-(2-ethoxyethyl)-4-methylmorpholin-4-ium	morpholinium
C678	4-methyl-4-(2-propoxyethyl)morpholin-4-ium	morpholinium
C679	4-(2-butoxyethyl)-4-methylmorpholin-4-ium	morpholinium
C680	4-methyl-4-[2-(pentyloxy)ethyl]morpholin-4-ium	morpholinium
C681	4-[2-(hexyloxy)ethyl]-4-methylmorpholin-4-ium	morpholinium
C682	4-[2-(heptyloxy)ethyl]-4-methylmorpholin-4-ium	morpholinium
C683	4-methyl-4-[2-(octyloxy)ethyl]morpholin-4-ium	morpholinium
C684	1-Methylpyrimidin-1-ium	pyrimidinium
C685	1-Ethylpyrimidin-1-ium	pyrimidinium
C686	1-Propylpyrimidin-1-ium	pyrimidinium
C687	1-Butylpyrimidin-1-ium	pyrimidinium
C688	1-Pentylpyrimidin-1-ium	pyrimidinium
C689	1-Hexylpyrimidin-1-ium	pyrimidinium
C690	1-Heptylpyrimidin-1-ium	pyrimidinium
C691	1-Octylpyrimidin-1-ium	pyrimidinium
C692	1-Nonylpyrimidin-1-ium	pyrimidinium
C693	1-Decylpyrimidin-1-ium	pyrimidinium
C694	4-methylpiperazin-1-ium	piperazinium
C695	4-ethylpiperazin-1-ium	piperazinium
C696	4-propylpiperazin-1-ium	piperazinium
C697	4-butylpiperazin-1-ium	piperazinium
C698	4-pentylpiperazin-1-ium	piperazinium
C699	4-hexylpiperazin-1-ium	piperazinium
C700	4-heptylpiperazin-1-ium	piperazinium
C701	4-octylpiperazin-1-ium	piperazinium
C702	1,1,4-trimethylpiperazin-1-ium	piperazinium
C703	1-ethyl-1,4-dimethylpiperazin-1-ium	piperazinium
C704	1,4-dimethyl-1-propylpiperazin-1-ium	piperazinium
C705	1-butyl-1,4-dimethylpiperazin-1-ium	piperazinium
C706	1,4-dimethyl-1-pentylpiperazin-1-ium	piperazinium
C707	1-hexyl-1,4-dimethylpiperazin-1-ium	piperazinium
C708	1-heptyl-1,4-dimethylpiperazin-1-ium	piperazinium
C709	1,4-dimethyl-1-octylpiperazin-1-ium	piperazinium
C710	2-hydroxy-N-(methoxymethyl)-N,N-dimethylethanaminium	ammonium
C711	N-(ethoxymethyl)-2-hydroxy-N,N-dimethylethanaminium	ammonium
C712	2-hydroxy-N,N-dimethyl-N-(propoxymethyl)ethanaminium	ammonium
C713	N-(butoxymethyl)-2-hydroxy-N,N-dimethylethanaminium	ammonium
C714	2-hydroxy-N,N-dimethyl-N-[(pentyloxy)methyl]ethanaminium	ammonium
C715	N-[(hexyloxy)methyl]-2-hydroxy-N,N-dimethylethanaminium	ammonium
C716	N-[(heptyloxy)methyl]-2-hydroxy-N,N-dimethylethanaminium	ammonium
C717	(2-hydroxyethyl)dimethyloctyloxymethylammonium	ammonium
C718	(2-hydroxyethyl)dimethylnonyloxymethylammonium	ammonium
C719	(2-hydroxyethyl)dimethyldecyloxymethylammonium	ammonium
C720	(2-hydroxyethyl)dimethylundecyloxymethylammonium	ammonium
C721	(2-hydroxyethyl)dimethyldodecyloxymethylammonium	ammonium
C722	(2-hydroxyethyl)dimethyltetradecyloxymethylammonium	ammonium
C723	2-(acetyloxy)-N-(methoxymethyl)-N,N-dimethylethanaminium	ammonium
C724	2-(acetyloxy)-N-(ethoxymethyl)-N,N-dimethylethanaminium	ammonium
C725	2-(acetyloxy)-N,N-dimethyl-N-(propoxymethyl)ethanaminium	ammonium
C726	2-(acetyloxy)-N-(butoxymethyl)-N,N-dimethylethanaminium	ammonium
C727	2-(acetyloxy)-N,N-dimethyl-N-[(pentyloxy)methyl]ethanaminium	ammonium
C728	2-(acetyloxy)-N-[(hexyloxy)methyl]-N,N-dimethylethanaminium	ammonium
C729	2-(acetyloxy)-N-[(heptyloxy)methyl]-N,N-dimethylethanaminium	ammonium
C730	(2-acetoxyethyl)dimethyloctyloxymethylammonium	ammonium
C731	(2-acetoxyethyl)dimethylnonyloxymethylammonium	ammonium
C732	(2-acetoxyethyl)dimethyldecyloxymethylammonium	ammonium
C733	(2-acetoxyethyl)dimethylundecyloxymethylammonium	ammonium
C734	(2-acetoxyethyl)dimethyldodecyloxymethylammonium	ammonium
C735	(2-acetoxyethyl)dimethyltetradecyloxymethylammonium	ammonium

## Sheet: Table 3S
Table 3S	Detailes of ILs used in the classification model development
ID	Cation	Anion	abbreviation in original paper	SMILES_Cation	SMILES_Anion	MIC(oryginal)	unit	Refs.	MIC_recalc_ug_ml	Class	Predicted class	split	MW_A	Se_A	Sp_A	Si_A	Me_A	Mp_A	Mi_A	GD_A	nH_A	nC_A	nN_A	nO_A	nP_A	nS_A	nF_A	nCL_A	nBR_A	nI_A	nB_A	nCsp3_A	nCsp2_A	nCsp_A	nCIC_A	nCIR_A	TRS_A	Rperim_A	Rbrid_A	MCD_A	RFD_A	RCI_A	NRS_A	NNRS_A	nR05_A	nR06_A	nR09_A	nBnz_A	ARR_A
1	ethyltrihexylphosphonium	bromide	1a	C(C[P+](CC)(CCCCCC)CCCCCC)CCCC	[Br-]	20	μM	Cieniecka-Roslonkiewicz et al., 2005	7.9102	Active	Active	2	79.9	1.171	1.733	1.049	1.171	1.733	1.049	0	0	0	0	0	0	0	0	0	1	0	0	0	0	0	0	0	0	0	0	0	0	0	0	0	0	0	0	0	0
2	propyltrihexylphosphonium	bromide	1b	C(C[P+](CCC)(CCCCCC)CCCCCC)CCCC	[Br-]	19.5	μM	Cieniecka-Roslonkiewicz et al., 2005	7.98603	Active	Active	1	79.9	1.171	1.733	1.049	1.171	1.733	1.049	0	0	0	0	0	0	0	0	0	1	0	0	0	0	0	0	0	0	0	0	0	0	0	0	0	0	0	0	0	0
3	butyltrihexylphosphonium	bromide	1c	C(C[P+](CCCC)(CCCCCC)CCCCCC)CCCC	[Br-]	9.4	μM	Cieniecka-Roslonkiewicz et al., 2005	3.98156	Active	Active	2	79.9	1.171	1.733	1.049	1.171	1.733	1.049	0	0	0	0	0	0	0	0	0	1	0	0	0	0	0	0	0	0	0	0	0	0	0	0	0	0	0	0	0	0
4	tetrahexylphosphonium	bromide	1d	C(C[P+](CCCCCC)(CCCCCC)CCCCCC)CCCC	[Br-]	8.9	μM	Cieniecka-Roslonkiewicz et al., 2005	4.01951	Active	Active	2	79.9	1.171	1.733	1.049	1.171	1.733	1.049	0	0	0	0	0	0	0	0	0	1	0	0	0	0	0	0	0	0	0	0	0	0	0	0	0	0	0	0	0	0
5	tetrahexylphosphonium	chloride	2a	C(C[P+](CCCCCC)(CCCCCC)CCCCCC)CCCC	[Cl-]	2.5	μM	Cieniecka-Roslonkiewicz et al., 2005	1.01795	Active	Active	1	35.45	1.266	1.239	1.152	1.266	1.239	1.152	0	0	0	0	0	0	0	0	1	0	0	0	0	0	0	0	0	0	0	0	0	0	0	0	0	0	0	0	0	0
6	trihexyl(heptyl)phosphonium	chloride	2b	C([P+](CCCCCC)(CCCCCC)CCCCCCC)CCCCC	[Cl-]	4.7	μM	Cieniecka-Roslonkiewicz et al., 2005	1.97969	Active	Active	2	35.45	1.266	1.239	1.152	1.266	1.239	1.152	0	0	0	0	0	0	0	0	1	0	0	0	0	0	0	0	0	0	0	0	0	0	0	0	0	0	0	0	0	0
7	trihexyl(octyl)phosphonium	chloride	2c	C([P+](CCCCCC)(CCCCCC)CCCCCCCC)CCCCC	[Cl-]	2.3	μM	Cieniecka-Roslonkiewicz et al., 2005	1.00105	Active	Active	2	35.45	1.266	1.239	1.152	1.266	1.239	1.152	0	0	0	0	0	0	0	0	1	0	0	0	0	0	0	0	0	0	0	0	0	0	0	0	0	0	0	0	0	0
8	trihexyl(decyl)phosphonium	chloride	2d	C(CCCCCCCC[P+](CCCCCC)(CCCCCC)CCCCCC)C	[Cl-]	8.6	μM	Cieniecka-Roslonkiewicz et al., 2005	3.98438	Active	Active	1	35.45	1.266	1.239	1.152	1.266	1.239	1.152	0	0	0	0	0	0	0	0	1	0	0	0	0	0	0	0	0	0	0	0	0	0	0	0	0	0	0	0	0	0
9	trihexyl(tetradecyl)phosphonium	chloride	2f	CCCCCC[P+](CCCCCC)(CCCCCC)CCCCCCCCCCCCCC	[Cl-]	119	μM	Cieniecka-Roslonkiewicz et al., 2005	61.811	Inactive	Inactive	1	35.45	1.266	1.239	1.152	1.266	1.239	1.152	0	0	0	0	0	0	0	0	1	0	0	0	0	0	0	0	0	0	0	0	0	0	0	0	0	0	0	0	0	0
10	trihexyl(hexadecyl)phosphonium	chloride	2g	CCCCCC[P+](CCCCCC)(CCCCCC)CCCCCCCCCCCCCCCC	[Cl-]	228	μM	Cieniecka-Roslonkiewicz et al., 2005	124.825	Inactive	Inactive	2	35.45	1.266	1.239	1.152	1.266	1.239	1.152	0	0	0	0	0	0	0	0	1	0	0	0	0	0	0	0	0	0	0	0	0	0	0	0	0	0	0	0	0	0
11	Trihexyl(tetradecyl)phosphonium	trifluoromethanesulfonate	3a	CCCCCC[P+](CCCCCC)(CCCCCC)CCCCCCCCCCCCCC	C(F)(F)(F)S(=O)(=O)[O-]	790	μM	Cieniecka-Roslonkiewicz et al., 2005	500.11	Inactive	Inactive	2	149.08	10.422	4.966	10.19	1.303	0.621	1.274	0.25	0	1	0	3	0	1	3	0	0	0	0	1	0	0	0	0	0	0	0	0	0	0	0	0	0	0	0	0	0
12	Trihexyl(tetradecyl)phosphonium	bis(trifluoromethylsulfonyl)imide	3b	CCCCCC[P+](CCCCCC)(CCCCCC)CCCCCCCCCCCCCC	FC(F)(F)S(=O)(=O)[N-]S(=O)(=O)C(F)(F)F	>644	μM	Cieniecka-Roslonkiewicz et al., 2005	984.212	Inactive	Inactive	1	280.17	19.349	9.648	19.252	1.29	0.643	1.283	0.133	0	2	1	4	0	2	6	0	0	0	0	2	0	0	0	0	0	0	0	0	0	0	0	0	0	0	0	0	0
13	Trihexyl(tetradecyl)phosphonium	nitrate	3d	CCCCCC[P+](CCCCCC)(CCCCCC)CCCCCCCCCCCCCC	[N+](=O)([O-])[O-]	229	μM	Cieniecka-Roslonkiewicz et al., 2005	125.029	Inactive	Inactive	1	62.01	5.142	1.988	4.919	1.285	0.497	1.23	0.5	0	0	1	3	0	0	0	0	0	0	0	0	0	0	0	0	0	0	0	0	0	0	0	0	0	0	0	0	0
14	(2-hydroxyethyl)dimethylnonyloxymethylammonium	acesulfamate	2h	C[N+](C)(COCCCCCCCCC)CCO	CC1=CC(=O)[N-]S(=O)(=O)O1	153	μM	Pernak et al., 2007	62.5204	Inactive	Active	2	162.16	15.313	9.614	15.879	1.094	0.687	1.134	0.222	4	4	1	4	0	1	0	0	0	0	0	1	3	0	1	1	6	6	0	0.6	0	1	1	1	0	1	0	0	0
15	(2-hydroxyethyl)dimethyldodecyloxymethylammonium	acesulfamate	2k	C[N+](C)(COCCCCCCCCCCCC)CCO	CC1=CC(=O)[N-]S(=O)(=O)O1	26	μM	Pernak et al., 2007	11.7187	Active	Active	1	162.16	15.313	9.614	15.879	1.094	0.687	1.134	0.222	4	4	1	4	0	1	0	0	0	0	0	1	3	0	1	1	6	6	0	0.6	0	1	1	1	0	1	0	0	0
16	(2-acetoxyethyl)dimethyloctyloxymethylammonium	acesulfamate	3g	C[N+](C)(COCCCCCCCC)CCOC(C)=O	CC1=CC(=O)[N-]S(=O)(=O)O1	143	μM	Pernak et al., 2007	62.4395	Inactive	Inactive	1	162.16	15.313	9.614	15.879	1.094	0.687	1.134	0.222	4	4	1	4	0	1	0	0	0	0	0	1	3	0	1	1	6	6	0	0.6	0	1	1	1	0	1	0	0	0
17	(2-acetoxyethyl)dimethyldecyloxymethylammonium	acesulfamate	3i	C[N+](C)(COCCCCCCCCCC)CCOC(C)=O	CC1=CC(=O)[N-]S(=O)(=O)O1	67	μM	Pernak et al., 2007	31.1349	Inactive	Inactive	1	162.16	15.313	9.614	15.879	1.094	0.687	1.134	0.222	4	4	1	4	0	1	0	0	0	0	0	1	3	0	1	1	6	6	0	0.6	0	1	1	1	0	1	0	0	0
18	(2-acetoxyethyl)dimethyldodecyloxymethylammonium	acesulfamate	3k	C[N+](C)(COCCCCCCCCCCCC)CCOC(C)=O	CC1=CC(=O)[N-]S(=O)(=O)O1	32	μM	Pernak et al., 2007	15.7683	Active	Inactive	2	162.16	15.313	9.614	15.879	1.094	0.687	1.134	0.222	4	4	1	4	0	1	0	0	0	0	0	1	3	0	1	1	6	6	0	0.6	0	1	1	1	0	1	0	0	0
19	(2-acetoxyethyl)dimethyltetradecyloxymethylammonium	acesulfamate	3l	C[N+](C)(COCCCCCCCCCCCCCC)CCOC(C)=O	CC1=CC(=O)[N-]S(=O)(=O)O1	60	μM	Pernak et al., 2007	31.2492	Inactive	Inactive	2	162.16	15.313	9.614	15.879	1.094	0.687	1.134	0.222	4	4	1	4	0	1	0	0	0	0	0	1	3	0	1	1	6	6	0	0.6	0	1	1	1	0	1	0	0	0
20	3a	chloride	3a	Cn2cc[n+](C[Se]c1ccccc1)c2	[Cl-]	>0.45	μM	Alberto et al., 2011	0.258903	Active	Active	1	35.45	1.266	1.239	1.152	1.266	1.239	1.152	0	0	0	0	0	0	0	0	1	0	0	0	0	0	0	0	0	0	0	0	0	0	0	0	0	0	0	0	0	0
21	4a	chloride	4a	Cn2cc[n+](C[Se]c1ccc(C)cc1)c2	[Cl-]	>0.42	μM	Alberto et al., 2011	0.253428	Active	Active	1	35.45	1.266	1.239	1.152	1.266	1.239	1.152	0	0	0	0	0	0	0	0	1	0	0	0	0	0	0	0	0	0	0	0	0	0	0	0	0	0	0	0	0	0
22	5a	chloride	5a	Cn2cc[n+](C[Se]c1ccc(OC)cc1)c2	[Cl-]	>0.40	μM	Alberto et al., 2011	0.25416	Active	Active	1	35.45	1.266	1.239	1.152	1.266	1.239	1.152	0	0	0	0	0	0	0	0	1	0	0	0	0	0	0	0	0	0	0	0	0	0	0	0	0	0	0	0	0	0
23	[p-Cl-Be-Se-metheneMIM][Cl]	chloride	6a	Cn2cc[n+](C[Se]c1ccc(Cl)cc1)c2	[Cl-]	0.1	μM	Alberto et al., 2011	0.032211	Active	Active	1	35.45	1.266	1.239	1.152	1.266	1.239	1.152	0	0	0	0	0	0	0	0	1	0	0	0	0	0	0	0	0	0	0	0	0	0	0	0	0	0	0	0	0	0
24	[o-methyl-Be-Se-metheneMIM][Cl]	chloride	7a	Cn2cc[n+](C[Se]c1ccccc1C)c2	[Cl-]	0.42	μM	Alberto et al., 2011	0.126714	Active	Active	1	35.45	1.266	1.239	1.152	1.266	1.239	1.152	0	0	0	0	0	0	0	0	1	0	0	0	0	0	0	0	0	0	0	0	0	0	0	0	0	0	0	0	0	0
25	8a	chloride	8a	Cn2cc[n+](C[Se]c1ccccc1OC)c2	[Cl-]	>0.40	μM	Alberto et al., 2011	0.25416	Active	Active	2	35.45	1.266	1.239	1.152	1.266	1.239	1.152	0	0	0	0	0	0	0	0	1	0	0	0	0	0	0	0	0	0	0	0	0	0	0	0	0	0	0	0	0	0
26	9a	chloride	9a	Cn2cc[n+](C[Se]c1c(C)cc(C)cc1C)c2	[Cl-]	>0.39	μM	Alberto et al., 2011	0.257213	Active	Active	1	35.45	1.266	1.239	1.152	1.266	1.239	1.152	0	0	0	0	0	0	0	0	1	0	0	0	0	0	0	0	0	0	0	0	0	0	0	0	0	0	0	0	0	0
27	1-dodecyl-3-methylimidazolium	bromide	C12mim Br	c1c[n+](cn1C)CCCCCCCCCCCC	[Br-]	97	μM	Cornellas et al., 2011	32.1448	Inactive	Inactive	1	79.9	1.171	1.733	1.049	1.171	1.733	1.049	0	0	0	0	0	0	0	0	0	1	0	0	0	0	0	0	0	0	0	0	0	0	0	0	0	0	0	0	0	0
28	1-tetradecyl-3-methylimidazolium	bromide	C14mim Br	c1c[n+](cn1C)CCCCCCCCCCCCCC	[Br-]	45	μM	Cornellas et al., 2011	16.1753	Inactive	Active	2	79.9	1.171	1.733	1.049	1.171	1.733	1.049	0	0	0	0	0	0	0	0	0	1	0	0	0	0	0	0	0	0	0	0	0	0	0	0	0	0	0	0	0	0
29	1-decylpyridinium	bromide	C10Pyr Br	CCCCCCCCCC[n+]1ccccc1	[Br-]	428	μM	Cornellas et al., 2011	128.537	Inactive	Inactive	1	79.9	1.171	1.733	1.049	1.171	1.733	1.049	0	0	0	0	0	0	0	0	0	1	0	0	0	0	0	0	0	0	0	0	0	0	0	0	0	0	0	0	0	0
30	1-tetradecylpyridinium	bromide	C14Pyr Br	CCCCCCCCCCCCCC[n+]1ccccc1	[Br-]	22	μM	Cornellas et al., 2011	7.84168	Active	Active	1	79.9	1.171	1.733	1.049	1.171	1.733	1.049	0	0	0	0	0	0	0	0	0	1	0	0	0	0	0	0	0	0	0	0	0	0	0	0	0	0	0	0	0	0
31	1-butyl-3-methylimidazolium	thiocyanate	SCN	Cn1cc[n+](CCCC)c1	C(#N)[S-]	3.12	g/L	Hajfarajollah et al., 2014	3120	Inactive	Inactive	2	58.09	3.236	3.273	3.211	1.079	1.091	1.07	0.667	0	1	1	0	0	1	0	0	0	0	0	0	0	1	0	0	0	0	0	0	0	0	0	0	0	0	0	0	0
32	1-butyl-3-methylimidazolium	tetrafluoroborate	BMIM BF4	Cn1cc[n+](CCCC)c1	F[B-](F)(F)F	12.5	g/L	Hajfarajollah et al., 2014	12500	Inactive	Inactive	1	86.81	6.647	2.994	6.926	1.329	0.599	1.385	0.4	0	0	0	0	0	0	4	0	0	0	1	0	0	0	0	0	0	0	0	0	0	0	0	0	0	0	0	0	0
33	1-butyl-3-methylimidazolium	tosylate (4-methylbenzenesulfonate)	PTS	Cn1cc[n+](CCCC)c1	CC1=CC=C(C=C1)S(=O)(=O)[O-]	50	g/L	Hajfarajollah et al., 2014	50000	Inactive	Inactive	1	171.21	18.651	12.676	20.001	1.036	0.704	1.111	0.2	7	7	0	3	0	1	0	0	0	0	0	1	6	0	1	1	6	6	0	0.545	0	1	1	1	0	1	0	1	0.545
34	didecyldimethylammonium	acesulfamate	[DDA][Ace]	C(CCCCC[N+](C)(CCCCCCCCCC)C)CCCC	CC1=CC(=O)[N-]S(=O)(=O)O1	8	ppm	Hough-Troutman et al., 2009	8	Active	Active	1	162.16	15.313	9.614	15.879	1.094	0.687	1.134	0.222	4	4	1	4	0	1	0	0	0	0	0	1	3	0	1	1	6	6	0	0.6	0	1	1	1	0	1	0	0	0
35	didecyldimethylammonium	saccharinate	[DDA][Sac]	C(CCCCC[N+](C)(CCCCCCCCCC)C)CCCC	O=C1[N-]S(=O)(=O)c2ccccc12	4	ppm	Hough-Troutman et al., 2009	4	Active	Active	2	182.19	16.986	12.159	17.669	1.062	0.76	1.104	0.197	4	7	1	3	0	1	0	0	0	0	0	0	7	0	2	3	11	9	1	0.75	0.222	1.222	1	0.5	1	1	1	1	0.462
36	1-methyl-3-octylimidazolium	chloride	[OMIM] [Cl]	Cn1cc[n+](CCCCCCCC)c1	[Cl-]	2	mM	Luczak et al., 2010	461.64	Inactive	Inactive	1	35.45	1.266	1.239	1.152	1.266	1.239	1.152	0	0	0	0	0	0	0	0	1	0	0	0	0	0	0	0	0	0	0	0	0	0	0	0	0	0	0	0	0	0
37	1-methyl-3-octylimidazolium	tetrafluoroborate	[OMIM] [BF4]	Cn1cc[n+](CCCCCCCC)c1	F[B-](F)(F)F	2.1	mM	Luczak et al., 2010	592.578	Inactive	Inactive	2	86.81	6.647	2.994	6.926	1.329	0.599	1.385	0.4	0	0	0	0	0	0	4	0	0	0	1	0	0	0	0	0	0	0	0	0	0	0	0	0	0	0	0	0	0
38	1-methyl-3-tetradecylimidazolium	chloride	[TDMIM] [Cl]	Cn1cc[n+](CCCCCCCCCCCCCC)c1	[Cl-]	0.01	mM	Luczak et al., 2010	3.15	Active	Active	1	35.45	1.266	1.239	1.152	1.266	1.239	1.152	0	0	0	0	0	0	0	0	1	0	0	0	0	0	0	0	0	0	0	0	0	0	0	0	0	0	0	0	0	0
39	1-methyl-3-octadecylimidazolium	chloride	[ODMIM] [Cl]	Cn1cc[n+](CCCCCCCCCCCCCCCCCC)c1	[Cl-]	0.02	mM	Luczak et al., 2010	7.4224	Active	Active	1	35.45	1.266	1.239	1.152	1.266	1.239	1.152	0	0	0	0	0	0	0	0	1	0	0	0	0	0	0	0	0	0	0	0	0	0	0	0	0	0	0	0	0	0
40	1-butyl-3-methylimidazolium	methylsulfate	BMIM MEOSO3	Cn1cc[n+](CCCC)c1	COS(=O)(=O)[O-]	62.5	mM	Luczak et al., 2010	15647.5	Inactive	Inactive	1	111.11	10.211	5.608	10.38	1.135	0.623	1.153	0.333	3	1	0	4	0	1	0	0	0	0	0	1	0	0	0	0	0	0	0	0	0	0	0	0	0	0	0	0	0
41	1-ethyl-3-methylimidazolium	tetrafluoroborate	[EMIM][BF4]	CC[n+]1ccn(C)c1	F[B-](F)(F)F	30.06	mM	Luczak et al., 2010	5951.88	Inactive	Inactive	2	86.81	6.647	2.994	6.926	1.329	0.599	1.385	0.4	0	0	0	0	0	0	4	0	0	0	1	0	0	0	0	0	0	0	0	0	0	0	0	0	0	0	0	0	0
42	1-ethyl-3-methylimidazolium	methylsulfate	[EMIM][MeOSO3]	CC[n+]1ccn(C)c1	COS(=O)(=O)[O-]	267.5	mM	Luczak et al., 2010	59465.2	Inactive	Inactive	2	111.11	10.211	5.608	10.38	1.135	0.623	1.153	0.333	3	1	0	4	0	1	0	0	0	0	0	1	0	0	0	0	0	0	0	0	0	0	0	0	0	0	0	0	0
43	1-butyl-3-methylimidazolium	chloride	[BMIM][Cl]	Cn1cc[n+](CCCC)c1	[Cl-]	207.5	mM	Luczak et al., 2010	36250.2	Inactive	Inactive	1	35.45	1.266	1.239	1.152	1.266	1.239	1.152	0	0	0	0	0	0	0	0	1	0	0	0	0	0	0	0	0	0	0	0	0	0	0	0	0	0	0	0	0	0
44	1-butyl-3-methylimidazolium	trifluoromethanesulfonate	[BMIM][TFMS]	Cn1cc[n+](CCCC)c1	C(F)(F)(F)S(=O)(=O)[O-]	62.5	mM	Luczak et al., 2010	18020.6	Inactive	Inactive	2	149.08	10.422	4.966	10.19	1.303	0.621	1.274	0.25	0	1	0	3	0	1	3	0	0	0	0	1	0	0	0	0	0	0	0	0	0	0	0	0	0	0	0	0	0
45	1-butyl-3-methylimidazolium	octylsulfate	[BMIM][OctOSO3]	Cn1cc[n+](CCCC)c1	[O-]S(=O)(=O)OCCCCCCCC	11.5	mM	Luczak et al., 2010	4008.55	Inactive	Inactive	1	209.32	30.396	17.938	34.287	1.013	0.598	1.143	0.154	17	8	0	4	0	1	0	0	0	0	0	8	0	0	0	0	0	0	0	0	0	0	0	0	0	0	0	0	0
46	1-hexyl-3-methylimidazolium	chloride	[HMIM][Cl]	Cn1cc[n+](CCCCCC)c1	[Cl-]	15.6	mM	Luczak et al., 2010	3163.06	Inactive	Inactive	1	35.45	1.266	1.239	1.152	1.266	1.239	1.152	0	0	0	0	0	0	0	0	1	0	0	0	0	0	0	0	0	0	0	0	0	0	0	0	0	0	0	0	0	0
47	1-hexyl-3-methylimidazolium	tetrafluoroborate	[HMIM][BF4]	Cn1cc[n+](CCCCCC)c1	F[B-](F)(F)F	7.8	mM	Luczak et al., 2010	1982.14	Inactive	Inactive	1	86.81	6.647	2.994	6.926	1.329	0.599	1.385	0.4	0	0	0	0	0	0	4	0	0	0	1	0	0	0	0	0	0	0	0	0	0	0	0	0	0	0	0	0	0
48	1-decyl-3-methylimidazolium	tetrafluoroborate	[DMIM][BF4]	c1c[n+](cn1C)CCCCCCCCCC	F[B-](F)(F)F	0.8	mM	Luczak et al., 2010	248.192	Inactive	Inactive	1	86.81	6.647	2.994	6.926	1.329	0.599	1.385	0.4	0	0	0	0	0	0	4	0	0	0	1	0	0	0	0	0	0	0	0	0	0	0	0	0	0	0	0	0	0
49	1-hexadecyl-3-methylimidazolium	chloride	[HDMIM][Cl]	Cn1cc[n+](CCCCCCCCCCCCCCCC)c1	[Cl-]	0.01	mM	Luczak et al., 2010	3.4306	Active	Active	1	35.45	1.266	1.239	1.152	1.266	1.239	1.152	0	0	0	0	0	0	0	0	1	0	0	0	0	0	0	0	0	0	0	0	0	0	0	0	0	0	0	0	0	0
50	1-decyloxymethyl-3-carbamoylpyridinium	chloride	1j	O=C(N)c1ccc[n+](COCCCCCCCCCC)c1	[Cl-]	23	μM	Pernak et al., 2001a	7.56539	Active	Inactive	2	35.45	1.266	1.239	1.152	1.266	1.239	1.152	0	0	0	0	0	0	0	0	1	0	0	0	0	0	0	0	0	0	0	0	0	0	0	0	0	0	0	0	0	0
51	1-dodecyloxymethyl-3-carbamoylpyridinium	chloride	1k	O=C(N)c1ccc[n+](COCCCCCCCCCCCC)c1	[Cl-]	44	μM	Pernak et al., 2001a	15.7076	Active	Active	1	35.45	1.266	1.239	1.152	1.266	1.239	1.152	0	0	0	0	0	0	0	0	1	0	0	0	0	0	0	0	0	0	0	0	0	0	0	0	0	0	0	0	0	0
52	1-dodecyloxymethyl-3-carbamoylpyridinium	iodide	3b	O=C(N)c1ccc[n+](COCCCCCCCCCCCC)c1	[I-]	279	μM	Pernak et al., 2001a	125.115	Inactive	Inactive	1	126.9	1.011	3.04	0.928	1.011	3.04	0.928	0	0	0	0	0	0	0	0	0	0	1	0	0	0	0	0	0	0	0	0	0	0	0	0	0	0	0	0	0	0
53	1-decyloxymethyl-3-carbamoylpyridinium	tetrachlorocobalt(2-)	4a(CoCl42-)	O=C(N)c1ccc[n+](COCCCCCCCCCC)c1	Cl[Co-2](Cl)(Cl)Cl	6.3	μM	Pernak et al., 2001a	3.11352	Active	Inactive	2	200.73	5.993	9.216	5.306	1.199	1.843	1.061	0.4	0	0	0	0	0	0	0	4	0	0	0	0	0	0	0	0	0	0	0	0	0	0	0	0	0	0	0	0	0
54	1-heptyloxymethyl-3-carbamoyldimethoxyheptylpyridinium	chloride	5e	O=C(NCOCOCCCCCCC)c1ccc[n+](COCCCCCCC)c1	[Cl-]	9	μM	Pernak et al., 2001a	4.00599	Active	Active	1	35.45	1.266	1.239	1.152	1.266	1.239	1.152	0	0	0	0	0	0	0	0	1	0	0	0	0	0	0	0	0	0	0	0	0	0	0	0	0	0	0	0	0	0
55	1-octyloxymethyl-3-carbamoyldimethoxyoctylpyridinium	chloride	5f	O=C(NCOCOCCCCCCCC)c1ccc[n+](COCCCCCCCC)c1	[Cl-]	4	μM	Pernak et al., 2001a	1.89268	Active	Active	1	35.45	1.266	1.239	1.152	1.266	1.239	1.152	0	0	0	0	0	0	0	0	1	0	0	0	0	0	0	0	0	0	0	0	0	0	0	0	0	0	0	0	0	0
56	1-nonyloxymethyl-3-carbamoyldimethoxynonylpyridinium	chloride	5g	O=C(NCOCOCCCCCCCCC)c1ccc[n+](COCCCCCCCCC)c1	[Cl-]	4	μM	Pernak et al., 2001a	2.00492	Active	Active	1	35.45	1.266	1.239	1.152	1.266	1.239	1.152	0	0	0	0	0	0	0	0	1	0	0	0	0	0	0	0	0	0	0	0	0	0	0	0	0	0	0	0	0	0
57	1-dodecyloxymethyl-4-carbamoylpyridinium	chloride	6j	O=C(N)c1cc[n+](COCCCCCCCCCCCC)cc1	[Cl-]	88	μM	Pernak et al., 2001a	31.4151	Inactive	Inactive	1	35.45	1.266	1.239	1.152	1.266	1.239	1.152	0	0	0	0	0	0	0	0	1	0	0	0	0	0	0	0	0	0	0	0	0	0	0	0	0	0	0	0	0	0
58	1-ethyloxymethyl-3-(nicotionylaminomethyl)-benzimidazolium	chloride	2a	CCOC[n+]3cn(CNC(=O)c1cccnc1)c2ccccc23	[Cl-]	1443	μM	Pernak et al., 2001b	500.505	Inactive	Inactive	1	35.45	1.266	1.239	1.152	1.266	1.239	1.152	0	0	0	0	0	0	0	0	1	0	0	0	0	0	0	0	0	0	0	0	0	0	0	0	0	0	0	0	0	0
59	1-amyloxymethyl-3-(nicotionylaminomethyl)-benzimidazolium	chloride	2d	CCCCCOC[n+]3cn(CNC(=O)c1cccnc1)c2ccccc23	[Cl-]	1287	μM	Pernak et al., 2001b	500.566	Inactive	Inactive	1	35.45	1.266	1.239	1.152	1.266	1.239	1.152	0	0	0	0	0	0	0	0	1	0	0	0	0	0	0	0	0	0	0	0	0	0	0	0	0	0	0	0	0	0
60	1-heptyloxymethyl-3-(nicotionylaminomethyl)-benzimidazolium	chloride	2f	CCCCCCCOC[n+]3cn(CNC(=O)c1cccnc1)c2ccccc23	[Cl-]	600	μM	Pernak et al., 2001b	250.2	Inactive	Inactive	1	35.45	1.266	1.239	1.152	1.266	1.239	1.152	0	0	0	0	0	0	0	0	1	0	0	0	0	0	0	0	0	0	0	0	0	0	0	0	0	0	0	0	0	0
61	1-butyloxymethyl-3-(1-benzimidazolmethylamino)-pyridinium	chloride	4b	CCCCOC[n+]1cccc(c1)NCn3cnc2ccccc23	[Cl-]	722	μM	Pernak et al., 2001b	250.462	Inactive	Inactive	1	35.45	1.266	1.239	1.152	1.266	1.239	1.152	0	0	0	0	0	0	0	0	1	0	0	0	0	0	0	0	0	0	0	0	0	0	0	0	0	0	0	0	0	0
62	1-decyloxymethyl-3-(1-benzimidazolmethylamino)-pyridinium	chloride	4h	CCCCCCCCCCOC[n+]1cccc(c1)NCn3cnc2ccccc23	[Cl-]	72	μM	Pernak et al., 2001b	31.0378	Inactive	Inactive	1	35.45	1.266	1.239	1.152	1.266	1.239	1.152	0	0	0	0	0	0	0	0	1	0	0	0	0	0	0	0	0	0	0	0	0	0	0	0	0	0	0	0	0	0
63	1-undecyloxymethyl-3-(1-benzimidazolmethylamino)-pyridinium	chloride	4i	CCCCCCCCCCCOC[n+]1cccc(c1)NCn3cnc2ccccc23	[Cl-]	18	μM	Pernak et al., 2001b	8.01198	Active	Active	1	35.45	1.266	1.239	1.152	1.266	1.239	1.152	0	0	0	0	0	0	0	0	1	0	0	0	0	0	0	0	0	0	0	0	0	0	0	0	0	0	0	0	0	0
64	1-hexyloxymethyl-3-[1-(benzotriazol-1-yl)-methylamino]pyridinium	chloride	7d	CCCCCCOC[n+]1cccc(c1)NCn3nnc2ccccc23	[Cl-]	666	μM	Pernak et al., 2001b	250.383	Inactive	Inactive	2	35.45	1.266	1.239	1.152	1.266	1.239	1.152	0	0	0	0	0	0	0	0	1	0	0	0	0	0	0	0	0	0	0	0	0	0	0	0	0	0	0	0	0	0
65	1-heptyloxymethyl-3-[1-(benzotriazol-1-yl)-methylamino]pyridinium	chloride	7e	CCCCCCCOC[n+]1cccc(c1)NCn3nnc2ccccc23	[Cl-]	321	μM	Pernak et al., 2001b	125.184	Inactive	Inactive	2	35.45	1.266	1.239	1.152	1.266	1.239	1.152	0	0	0	0	0	0	0	0	1	0	0	0	0	0	0	0	0	0	0	0	0	0	0	0	0	0	0	0	0	0
66	1-undecyloxymethyl-3-[1-(benzotriazol-1-yl)-methylamino]pyridinium	chloride	7i	CCCCCCCCCCCOC[n+]1cccc(c1)NCn3nnc2ccccc23	[Cl-]	35.9	μM	Pernak et al., 2001b	16.015	Inactive	Inactive	1	35.45	1.266	1.239	1.152	1.266	1.239	1.152	0	0	0	0	0	0	0	0	1	0	0	0	0	0	0	0	0	0	0	0	0	0	0	0	0	0	0	0	0	0
67	1-methyl-3-hexyloxymethylimidazolium	chloride	1d	Cn1cc[n+](COCCCCCC)c1	[Cl-]	4300	μM	Pernak et al., 2003	1001	Inactive	Inactive	2	35.45	1.266	1.239	1.152	1.266	1.239	1.152	0	0	0	0	0	0	0	0	1	0	0	0	0	0	0	0	0	0	0	0	0	0	0	0	0	0	0	0	0	0
68	1-methyl-3-hexyloxymethylimidazolium	hexafluorophosphate	3d	Cn1cc[n+](COCCCCCC)c1	F[P-](F)(F)(F)(F)F	2900	μM	Pernak et al., 2003	992.699	Inactive	Inactive	1	144.97	9.643	3.972	10.215	1.378	0.567	1.459	0.286	0	0	0	0	1	0	6	0	0	0	0	0	0	0	0	0	0	0	0	0	0	0	0	0	0	0	0	0	0
69	1-methyl-3-nonyloxymethylimidazolium	chloride	1g	Cn1cc[n+](COCCCCCCCCC)c1	[Cl-]	228	μM	Pernak et al., 2003	62.6726	Inactive	Inactive	1	35.45	1.266	1.239	1.152	1.266	1.239	1.152	0	0	0	0	0	0	0	0	1	0	0	0	0	0	0	0	0	0	0	0	0	0	0	0	0	0	0	0	0	0
70	1-methyl-3-nonyloxymethylimidazolium	tetrafluoroborate	2g	Cn1cc[n+](COCCCCCCCCC)c1	F[B-](F)(F)F	384	μM	Pernak et al., 2003	125.276	Inactive	Inactive	1	86.81	6.647	2.994	6.926	1.329	0.599	1.385	0.4	0	0	0	0	0	0	4	0	0	0	1	0	0	0	0	0	0	0	0	0	0	0	0	0	0	0	0	0	0
71	1-methyl-3-decyloxymethylimidazolium	chloride	1h	Cn1cc[n+](COCCCCCCCCCC)c1	[Cl-]	54	μM	Pernak et al., 2003	15.6011	Active	Inactive	2	35.45	1.266	1.239	1.152	1.266	1.239	1.152	0	0	0	0	0	0	0	0	1	0	0	0	0	0	0	0	0	0	0	0	0	0	0	0	0	0	0	0	0	0
72	1-methyl-3-undecyloxymethylimidazolium	chloride	1i	Cn1cc[n+](COCCCCCCCCCCC)c1	[Cl-]	52	μM	Pernak et al., 2003	15.7529	Active	Active	1	35.45	1.266	1.239	1.152	1.266	1.239	1.152	0	0	0	0	0	0	0	0	1	0	0	0	0	0	0	0	0	0	0	0	0	0	0	0	0	0	0	0	0	0
73	1-methyl-3-undecyloxymethylimidazolium	tetrafluoroborate	2i	Cn1cc[n+](COCCCCCCCCCCC)c1	F[B-](F)(F)F	22	μM	Pernak et al., 2003	7.7946	Active	Active	2	86.81	6.647	2.994	6.926	1.329	0.599	1.385	0.4	0	0	0	0	0	0	4	0	0	0	1	0	0	0	0	0	0	0	0	0	0	0	0	0	0	0	0	0	0
74	1-methyl-3-undecyloxymethylimidazolium	hexafluorophosphate	3i	Cn1cc[n+](COCCCCCCCCCCC)c1	F[P-](F)(F)(F)(F)F	19	μM	Pernak et al., 2003	7.83674	Active	Active	1	144.97	9.643	3.972	10.215	1.378	0.567	1.459	0.286	0	0	0	0	1	0	6	0	0	0	0	0	0	0	0	0	0	0	0	0	0	0	0	0	0	0	0	0	0
75	1-methyl-3-dodecyloxymethylimidazolium	chloride	1j	Cn1cc[n+](COCCCCCCCCCCCC)c1	[Cl-]	25	μM	Pernak et al., 2003	7.92425	Active	Active	1	35.45	1.266	1.239	1.152	1.266	1.239	1.152	0	0	0	0	0	0	0	0	1	0	0	0	0	0	0	0	0	0	0	0	0	0	0	0	0	0	0	0	0	0
76	1-methyl-3-dodecyloxymethylimidazolium	tetrafluoroborate	2j	Cn1cc[n+](COCCCCCCCCCCCC)c1	F[B-](F)(F)F	21	μM	Pernak et al., 2003	7.73493	Active	Active	1	86.81	6.647	2.994	6.926	1.329	0.599	1.385	0.4	0	0	0	0	0	0	4	0	0	0	1	0	0	0	0	0	0	0	0	0	0	0	0	0	0	0	0	0	0
77	1-methyl-3-dodecyloxymethylimidazolium	hexafluorophosphate	3j	Cn1cc[n+](COCCCCCCCCCCCC)c1	F[P-](F)(F)(F)(F)F	18	μM	Pernak et al., 2003	7.67682	Active	Active	1	144.97	9.643	3.972	10.215	1.378	0.567	1.459	0.286	0	0	0	0	1	0	6	0	0	0	0	0	0	0	0	0	0	0	0	0	0	0	0	0	0	0	0	0	0
78	4-Benzyl-4-methylmorpholinium	methoxyacetate	6	C[N+]2(Cc1ccccc1)CCOCC2	COCC(=O)[O-]	>1.8	mM	Pernak et al., 2011	1013	Inactive	Inactive	1	89.08	11.691	6.267	12.666	1.063	0.57	1.151	0.333	5	3	0	3	0	0	0	0	0	0	0	2	1	0	0	0	0	0	0	0	0	0	0	0	0	0	0	0	0
79	4-benzyl-4-methylmorpholinium	chloride	BMmorf Cl	C[N+]2(Cc1ccccc1)CCOCC2	[Cl-]	>2.2	mM	Pernak et al., 2011	1002.14	Inactive	Inactive	1	35.45	1.266	1.239	1.152	1.266	1.239	1.152	0	0	0	0	0	0	0	0	1	0	0	0	0	0	0	0	0	0	0	0	0	0	0	0	0	0	0	0	0	0
80	2,2-Diethyl-1,1,3,3-tetramethylguanidinium	ethyl sulfate	[(C2)22(C1)2(C1)23gu][C2OSO3]	CC/[N+](CC)=C(/N(C)C)N(C)C	[O-]S(=O)(=O)OCC	>316	mM	Yu et al., 2016	188007	Inactive	Inactive	1	125.14	13.095	7.369	13.796	1.091	0.614	1.15	0.286	5	2	0	4	0	1	0	0	0	0	0	2	0	0	0	0	0	0	0	0	0	0	0	0	0	0	0	0	0
81	1-Propylpyrimidin-1-ium	tetrafluoroborate	[C3Pyr]BF4 (3c)	n1ccc[n+](c1)CCC	F[B-](F)(F)F	256	mg mL 1	Goel et al. 2016	256000	Inactive	Inactive	2	86.81	6.647	2.994	6.926	1.329	0.599	1.385	0.4	0	0	0	0	0	0	4	0	0	0	1	0	0	0	0	0	0	0	0	0	0	0	0	0	0	0	0	0	0
82	1-Pentylpyrimidin-1-ium	tetrafluoroborate	[C5Pyr]BF4 (3e)	n1ccc[n+](c1)CCCCC	F[B-](F)(F)F	256	mg mL 1	Goel et al. 2016	256000	Inactive	Inactive	1	86.81	6.647	2.994	6.926	1.329	0.599	1.385	0.4	0	0	0	0	0	0	4	0	0	0	1	0	0	0	0	0	0	0	0	0	0	0	0	0	0	0	0	0	0
83	Benzyldimethyloctylammonium	mandelate	4d	c1ccccc1C[N+](C)(CCCCCCCC)C	C1=CC=C(C=C1)C(C(=O)[O-])O	20	μM	Wiśniewska 2016	7.9926	Active	Inactive	2	151.15	18.575	12.028	20.081	1.032	0.668	1.116	0.2	7	8	0	3	0	0	0	0	0	0	0	1	7	0	1	1	6	6	0	0.545	0	1	1	1	0	1	0	1	0.545
84	Benzyldimethyldecylammonium	mandelate	4e	c1ccccc1C[N+](C)(CCCCCCCCCC)C	C1=CC=C(C=C1)C(C(=O)[O-])O	37.4	μM	Wiśniewska 2016	15.9956	Inactive	Inactive	1	151.15	18.575	12.028	20.081	1.032	0.668	1.116	0.2	7	8	0	3	0	0	0	0	0	0	0	1	7	0	1	1	6	6	0	0.545	0	1	1	1	0	1	0	1	0.545
85	Benzyldimethyldodecylammonium	mandelate	4f	c1ccccc1C[N+](C)(CCCCCCCCCCCC)C	C1=CC=C(C=C1)C(C(=O)[O-])O	8.8	μM	Wiśniewska 2016	4.0106	Active	Active	1	151.15	18.575	12.028	20.081	1.032	0.668	1.116	0.2	7	8	0	3	0	0	0	0	0	0	0	1	7	0	1	1	6	6	0	0.545	0	1	1	1	0	1	0	1	0.545
86	Benzyldimethyltetradecylammonium	mandelate	4g	c1ccccc1C[N+](C)(CCCCCCCCCCCCCC)C	C1=CC=C(C=C1)C(C(=O)[O-])O	2.1	μM	Wiśniewska 2016	1.016	Active	Active	1	151.15	18.575	12.028	20.081	1.032	0.668	1.116	0.2	7	8	0	3	0	0	0	0	0	0	0	1	7	0	1	1	6	6	0	0.545	0	1	1	1	0	1	0	1	0.545
87	Benzyldimethylhexadecylammonium	mandelate	4h	c1ccccc1C[N+](C)(CCCCCCCCCCCCCCCC)C	C1=CC=C(C=C1)C(C(=O)[O-])O	3.9	μM	Wiśniewska 2016	1.99629	Active	Active	1	151.15	18.575	12.028	20.081	1.032	0.668	1.116	0.2	7	8	0	3	0	0	0	0	0	0	0	1	7	0	1	1	6	6	0	0.545	0	1	1	1	0	1	0	1	0.545
88	Benzyldimethyloctadecylammonium	mandelate	4i	c1ccccc1C[N+](C)(CCCCCCCCCCCCCCCCCC)C	C1=CC=C(C=C1)C(C(=O)[O-])O	7.4	μM	Wiśniewska 2016	3.99548	Active	Active	1	151.15	18.575	12.028	20.081	1.032	0.668	1.116	0.2	7	8	0	3	0	0	0	0	0	0	0	1	7	0	1	1	6	6	0	0.545	0	1	1	1	0	1	0	1	0.545
89	Benzethonium	mandelate	4j	O(c1ccc(cc1)C(C)(C)CC(C)(C)C)CCOCC[N+](Cc2ccccc2)(C)C	C1=CC=C(C=C1)C(C(=O)[O-])O	1.7	μM	Wiśniewska 2016	0.958545	Active	Active	1	151.15	18.575	12.028	20.081	1.032	0.668	1.116	0.2	7	8	0	3	0	0	0	0	0	0	0	1	7	0	1	1	6	6	0	0.545	0	1	1	1	0	1	0	1	0.545
90	Benzyldimethyltetradecylammonium	chloride	3g	c1ccccc1C[N+](C)(CCCCCCCCCCCCCC)C	[Cl-]	0.5	μM	Wiśniewska 2016	0.184055	Active	Active	2	35.45	1.266	1.239	1.152	1.266	1.239	1.152	0	0	0	0	0	0	0	0	1	0	0	0	0	0	0	0	0	0	0	0	0	0	0	0	0	0	0	0	0	0
91	1-ethyl-3-methylimidazolium	chloride	[C2mim][Cl]	CC[n+]1ccn(C)c1	[Cl-]	>5000	mg/l	N. Weyhing-Zerrer et al. 2017	10000	Inactive	Inactive	1	35.45	1.266	1.239	1.152	1.266	1.239	1.152	0	0	0	0	0	0	0	0	1	0	0	0	0	0	0	0	0	0	0	0	0	0	0	0	0	0	0	0	0	0
92	1-hexyl-3-methylimidazolium	chloride	[C6mim][Cl]	Cn1cc[n+](CCCCCC)c1	[Cl-]	833	mg/l	N. Weyhing-Zerrer et al. 2017	833	Inactive	Inactive	2	35.45	1.266	1.239	1.152	1.266	1.239	1.152	0	0	0	0	0	0	0	0	1	0	0	0	0	0	0	0	0	0	0	0	0	0	0	0	0	0	0	0	0	0
93	1-decyl-3-methylimidazolium	chloride	[C10mim][Cl]	c1c[n+](cn1C)CCCCCCCCCC	[Cl-]	13.43	mg/l	N. Weyhing-Zerrer et al. 2017	13.43	Active	Active	1	35.45	1.266	1.239	1.152	1.266	1.239	1.152	0	0	0	0	0	0	0	0	1	0	0	0	0	0	0	0	0	0	0	0	0	0	0	0	0	0	0	0	0	0
94	trimethyloctylammonium	chloride	[TMC8A][Cl]	C[N+](C)(C)CCCCCCCC	[Cl-]	313	mg/l	N. Weyhing-Zerrer et al. 2017	313	Inactive	Inactive	1	35.45	1.266	1.239	1.152	1.266	1.239	1.152	0	0	0	0	0	0	0	0	1	0	0	0	0	0	0	0	0	0	0	0	0	0	0	0	0	0	0	0	0	0
95	dioctyldimethylammonium	chloride	[DC8DMA][Cl]	C[N+](C)(CCCCCCCC)CCCCCCCC	[Cl-]	6.25	mg/l	N. Weyhing-Zerrer et al. 2017	6.25	Active	Active	1	35.45	1.266	1.239	1.152	1.266	1.239	1.152	0	0	0	0	0	0	0	0	1	0	0	0	0	0	0	0	0	0	0	0	0	0	0	0	0	0	0	0	0	0
96	trioctylmethylammonium	chloride	[TC8MA][Cl]	C(CCCCCC[N+](CCCCCCCC)(CCCCCCCC)C)C	[Cl-]	0.78	mg/l	N. Weyhing-Zerrer et al. 2017	0.78	Active	Active	2	35.45	1.266	1.239	1.152	1.266	1.239	1.152	0	0	0	0	0	0	0	0	1	0	0	0	0	0	0	0	0	0	0	0	0	0	0	0	0	0	0	0	0	0
97	1-ethyl-3-methylimidazolium	tetrafluoroborate	[C2mim][BF4]	CC[n+]1ccn(C)c1	F[B-](F)(F)F	>5000	mg/l	N. Weyhing-Zerrer et al. 2017	10000	Inactive	Inactive	1	86.81	6.647	2.994	6.926	1.329	0.599	1.385	0.4	0	0	0	0	0	0	4	0	0	0	1	0	0	0	0	0	0	0	0	0	0	0	0	0	0	0	0	0	0
98	1-octyl-3-methylimidazolium	hexafluorophosphate	[C8mim][PF6]	c1c[n+](cn1C)CCCCCCCC	F[P-](F)(F)(F)(F)F	781	mg/l	N. Weyhing-Zerrer et al. 2017	781	Inactive	Inactive	1	144.97	9.643	3.972	10.215	1.378	0.567	1.459	0.286	0	0	0	0	1	0	6	0	0	0	0	0	0	0	0	0	0	0	0	0	0	0	0	0	0	0	0	0	0
99	1-ethyl-3-methylimidazolium	tris(pentafluoroethyl)trifluorophosphate	[C2mim][FAP]	CC[n+]1ccn(C)c1	FC(F)(C(F)(F)F)[P-](F)(F)(F)(C(F)(F)C(F)(F)F)C(F)(F)C(F)(F)F	81.38	mg/l	N. Weyhing-Zerrer et al. 2017	81.38	Inactive	Inactive	1	445.03	33.097	13.79	34.783	1.324	0.552	1.391	0.08	0	6	0	0	1	0	18	0	0	0	0	6	0	0	0	0	0	0	0	0	0	0	0	0	0	0	0	0	0
100	1-hexyl-3-methylimidazolium	tris(pentafluoroethyl)trifluorophosphate	[C6mim][FAP]	Cn1cc[n+](CCCCCC)c1	FC(F)(C(F)(F)F)[P-](F)(F)(F)(C(F)(F)C(F)(F)F)C(F)(F)C(F)(F)F	35.81	mg/l	N. Weyhing-Zerrer et al. 2017	35.81	Inactive	Inactive	2	445.03	33.097	13.79	34.783	1.324	0.552	1.391	0.08	0	6	0	0	1	0	18	0	0	0	0	6	0	0	0	0	0	0	0	0	0	0	0	0	0	0	0	0	0
101	trioctylmethylammonium	acetate	[TC8MA][Acetate]	C(CCCCCC[N+](CCCCCCCC)(CCCCCCCC)C)C	[O-]C(C)=O	0.78	mg/l	N. Weyhing-Zerrer et al. 2017	0.78	Active	Active	1	59.05	7.48	4.051	8.042	1.069	0.579	1.149	0.5	3	2	0	2	0	0	0	0	0	0	0	1	1	0	0	0	0	0	0	0	0	0	0	0	0	0	0	0	0
102	trioctylmethylammonium	benzoate	[TC8MA][Benzoate]	C(CCCCCC[N+](CCCCCCCC)(CCCCCCCC)C)C	[O-]C(=O)c1ccccc1	0.78	mg/l	N. Weyhing-Zerrer et al. 2017	0.78	Active	Active	1	121.12	14.364	9.813	15.457	1.026	0.701	1.104	0.25	5	7	0	2	0	0	0	0	0	0	0	0	7	0	1	1	6	6	0	0.667	0	1	1	1	0	1	0	1	0.667
103	trioctylmethylammonium	chloride	[TC8MA][Cl]	C(CCCCCC[N+](CCCCCCCC)(CCCCCCCC)C)C	[Cl-]	0.78	mg/l	N. Weyhing-Zerrer et al. 2017	0.78	Active	Active	2	35.45	1.266	1.239	1.152	1.266	1.239	1.152	0	0	0	0	0	0	0	0	1	0	0	0	0	0	0	0	0	0	0	0	0	0	0	0	0	0	0	0	0	0
104	trioctylmethylammonium	dicyanamide	[TC8MA][DCA]	C(CCCCCC[N+](CCCCCCCC)(CCCCCCCC)C)C	N#C[N-]C#N	1.04	mg/l	N. Weyhing-Zerrer et al. 2017	1.04	Active	Active	2	66.05	5.48	3.875	5.872	1.096	0.775	1.174	0.4	0	2	3	0	0	0	0	0	0	0	0	0	0	2	0	0	0	0	0	0	0	0	0	0	0	0	0	0	0
105	trioctylmethylammonium	docusate	[TC8MA][Docusate]	C(CCCCCC[N+](CCCCCCCC)(CCCCCCCC)C)C	O=S(=O)([O-])C(CC(=O)OCC(CC)CCCC)C(=O)OCC(CC)CCCC	1.56	mg/l	N. Weyhing-Zerrer et al. 2017	1.56	Active	Active	1	421.64	65.214	38.915	74.067	1.003	0.599	1.139	0.071	37	20	0	7	0	1	0	0	0	0	0	18	2	0	0	0	0	0	0	0	0	0	0	0	0	0	0	0	0
106	trioctylmethylammonium	heptafluorobutyrate	[TC8MA][HFB]	C(CCCCCC[N+](CCCCCCCC)(CCCCCCCC)C)C	FC(F)(C(F)(F)C([O-])=O)C(F)(F)F	1.56	mg/l	N. Weyhing-Zerrer et al. 2017	1.56	Active	Active	2	213.04	16.836	7.136	17.25	1.295	0.549	1.327	0.154	0	4	0	2	0	0	7	0	0	0	0	3	1	0	0	0	0	0	0	0	0	0	0	0	0	0	0	0	0
107	trioctylmethylammonium	bis(trifluoromethylsulfonyl)imide	[TC8MA][NTf2]	C(CCCCCC[N+](CCCCCCCC)(CCCCCCCC)C)C	FC(F)(F)S(=O)(=O)[N-]S(=O)(=O)C(F)(F)F	1.25	mg/l	N. Weyhing-Zerrer et al. 2017	1.25	Active	Active	2	280.17	19.349	9.648	19.252	1.29	0.643	1.283	0.133	0	2	1	4	0	2	6	0	0	0	0	2	0	0	0	0	0	0	0	0	0	0	0	0	0	0	0	0	0
108	trioctylmethylammonium	Salicylate	[TC8MA][Salicylate]	C(CCCCCC[N+](CCCCCCCC)(CCCCCCCC)C)C	OC(=O)c1ccccc1[O-]	0.78	mg/l	N. Weyhing-Zerrer et al. 2017	0.78	Active	Active	1	137.12	15.691	10.267	16.666	1.046	0.684	1.111	0.222	5	7	0	3	0	0	0	0	0	0	0	0	7	0	1	1	6	6	0	0.6	0	1	1	1	0	1	0	1	0.6
109	trioctylmethylammonium	Stearate	[TC8MA][Stearat]	C(CCCCCC[N+](CCCCCCCC)(CCCCCCCC)C)C	[O-]C(=O)CCCCCCCCCCCCCCCCC	1.3	mg/l	N. Weyhing-Zerrer et al. 2017	1.3	Active	Active	1	283.53	53.618	32.234	62.685	0.975	0.586	1.14	0.1	35	18	0	2	0	0	0	0	0	0	0	17	1	0	0	0	0	0	0	0	0	0	0	0	0	0	0	0	0
110	trioctylmethylphosphonium	acetate	[TC8MP] [Acetate]	C(CCCCCC[P+](CCCCCCCC)(CCCCCCCC)C)C	[O-]C(C)=O	1.04	mg/l	N. Weyhing-Zerrer et al. 2017	1.04	Active	Active	1	59.05	7.48	4.051	8.042	1.069	0.579	1.149	0.5	3	2	0	2	0	0	0	0	0	0	0	1	1	0	0	0	0	0	0	0	0	0	0	0	0	0	0	0	0
111	trioctylmethylphosphonium	benzoate	[TC8MP][Benzoate]	C(CCCCCC[P+](CCCCCCCC)(CCCCCCCC)C)C	[O-]C(=O)c1ccccc1	1.04	mg/l	N. Weyhing-Zerrer et al. 2017	1.04	Active	Active	1	121.12	14.364	9.813	15.457	1.026	0.701	1.104	0.25	5	7	0	2	0	0	0	0	0	0	0	0	7	0	1	1	6	6	0	0.667	0	1	1	1	0	1	0	1	0.667
112	trioctylmethylphosphonium	docusate	[TC8MP][Docusate]	C(CCCCCC[P+](CCCCCCCC)(CCCCCCCC)C)C	O=S(=O)([O-])C(CC(=O)OCC(CC)CCCC)C(=O)OCC(CC)CCCC	1.56	mg/l	N. Weyhing-Zerrer et al. 2017	1.56	Active	Active	1	421.64	65.214	38.915	74.067	1.003	0.599	1.139	0.071	37	20	0	7	0	1	0	0	0	0	0	18	2	0	0	0	0	0	0	0	0	0	0	0	0	0	0	0	0
113	trihexyltetradecylphosphonium	chloride	[(C6)3C14P][Cl]	CCCCCC[P+](CCCCCC)(CCCCCC)CCCCCCCCCCCCCC	[Cl-]	8.14	mg/l	N. Weyhing-Zerrer et al. 2018	8.14	Active	Inactive	2	35.45	1.266	1.239	1.152	1.266	1.239	1.152	0	0	0	0	0	0	0	0	1	0	0	0	0	0	0	0	0	0	0	0	0	0	0	0	0	0	0	0	0	0
114	triethylmethylammonium	chloride	[(C2)3C1N][Cl]	CC[N+](C)(CC)CC	[Cl-]	>5000	mg/l	N. Weyhing-Zerrer et al. 2018	10000	Inactive	Inactive	2	35.45	1.266	1.239	1.152	1.266	1.239	1.152	0	0	0	0	0	0	0	0	1	0	0	0	0	0	0	0	0	0	0	0	0	0	0	0	0	0	0	0	0	0
115	1-butyl-3-methylimidazolium	tris(pentafluoroethyl)trifluorophosphate	[C4C1im][FAP]	Cn1cc[n+](CCCC)c1	FC(F)(C(F)(F)F)[P-](F)(F)(F)(C(F)(F)C(F)(F)F)C(F)(F)C(F)(F)F	182	mg/l	N. Weyhing-Zerrer et al. 2018	182	Inactive	Inactive	2	445.03	33.097	13.79	34.783	1.324	0.552	1.391	0.08	0	6	0	0	1	0	18	0	0	0	0	6	0	0	0	0	0	0	0	0	0	0	0	0	0	0	0	0	0
116	(S)-2-((1-Ethoxy-1-oxo-3-phenylpropan-2-yl)amino)-N-(2-hydroxyethyl)-N,N-dimethyl-2-oxoethan-	bromide	10	OCC[N+](C)(C)CC(=O)NC(Cc1ccccc1)C(=O)OCC	[Br-]	2000	μM	Gathergood et al. 2016	806.72	Inactive	Inactive	1	79.9	1.171	1.733	1.049	1.171	1.733	1.049	0	0	0	0	0	0	0	0	0	1	0	0	0	0	0	0	0	0	0	0	0	0	0	0	0	0	0	0	0	0
117	(1S,2S)-1-({[(2S)-1-Ethoxy-1-oxo-3-phenylpropan-2-yl]carbamoyl}methyl)-2-	bromide	12	CCOC(=O)C2CCC[N+]2(C)CC(=O)NC(Cc1ccccc1)C(=O)OCC	[Br-]	>2000	μM	Gathergood et al. 2016	1885.76	Inactive	Inactive	1	79.9	1.171	1.733	1.049	1.171	1.733	1.049	0	0	0	0	0	0	0	0	0	1	0	0	0	0	0	0	0	0	0	0	0	0	0	0	0	0	0	0	0	0
118	(1R,2R)-1-(2-(((S)-1-Ethoxy-1-oxo-3-phenylpropan-2-yl)amino)-2-oxoethyl)-2-	bromide	15	CCOC(=O)C2CCC[N+]2(C)CC(=O)NC(Cc1ccccc1)C(=O)OCC	[Br-]	1000	μM	Gathergood et al. 2016	471.44	Inactive	Inactive	1	79.9	1.171	1.733	1.049	1.171	1.733	1.049	0	0	0	0	0	0	0	0	0	1	0	0	0	0	0	0	0	0	0	0	0	0	0	0	0	0	0	0	0	0
119	(S)-3-(2-((1-Ethoxy-3-(4-hydroxyphenyl)-1-oxopropan-2-yl)amino)-2-oxoethyl)-1-methyl-1Himidazol-	bromide	16	O=C(C[n+]1ccn(C)c1)NC(Cc2ccc(O)cc2)C(=O)OCC	[Br-]	1000	μM	Gathergood et al. 2016	411.31	Inactive	Inactive	2	79.9	1.171	1.733	1.049	1.171	1.733	1.049	0	0	0	0	0	0	0	0	0	1	0	0	0	0	0	0	0	0	0	0	0	0	0	0	0	0	0	0	0	0
120	(S)-1-(2-((1-Ethoxy-3-(4-hydroxyphenyl)-1-oxopropan-2-yl)amino)-2-oxoethyl)pyridin-1-ium	bromide	17	O=C(C[n+]1ccccc1)NC(Cc2ccc(O)cc2)C(=O)OCC	[Br-]	>2000	μM	Gathergood et al. 2016	1637.24	Inactive	Inactive	2	79.9	1.171	1.733	1.049	1.171	1.733	1.049	0	0	0	0	0	0	0	0	0	1	0	0	0	0	0	0	0	0	0	0	0	0	0	0	0	0	0	0	0	0
	Descriptors applied in the cllasification tree model
	Descriptors does not applied in the cllasification tree model
The explanations of abbreviations of descriptors applied in the classification tree model
MW_A	molecular weight of anion
Me_A	mean atomic Sanderson electronegativity (scaled on Carbon atom) calculated for anion
MW_C	molecular weight of cation
Mv_C	mean atomic van der Waals volume (scaled on Carbon atom) calculated for cation
Me_C	mean atomic Sanderson electronegativity (scaled on Carbon atom) calculated for cation
Mp_C	mean atomic polarizability (scaled on Carbon atom) calculated for cation
nCsp3_C	number of sp3 hybridized Carbon atoms calculated for cation
nCconj_C	number of non-aromatic conjugated C(sp2) calculated for cation
nRCOOR_C	number of esters (aliphatic) calculated for cation
[Ref 1]	A. Mauri, V. Consonni, M. Pavan and R. Todeschini, Match-Commun Math Co, 2006, 56, 237-248
The explanations of abbreviations of descriptors which are not applied in the classification tree model are available here:
[Ref 1]	A. Mauri, V. Consonni, M. Pavan and R. Todeschini, Match-Commun Math Co, 2006, 56, 237-248
[Ref 2]	C. W. Yap, J Comput Chem, 2011, 32, 1466-1474
[truncated: 291 more columns]

## Sheet: Table 4S
Table 4S	Detailes of MM modeling and applicability domain analysis
Group	ILs_ID	MATS1m_C	MW_C	MW_A	HTi_A	ON0V_C	X5Av_C	L3m_A	ON0_C	H8e_C	Sv_C	GNar_C	G2u_C	G3u_C	Mor19u_A	R4u+_A	SpMin6_Bh(i)_C	C-040_A	F02[C-N]_A	R7p+_C	J_B(p)_A	water	sediment	organic	degradated	biodegradation class	SOL ins	KOW ins	CMC ins	KD ins	BIO ins	PC1	PC2
pyridinium	C205_A54	0.004	178.33	162.16	11.879	6.25	0.046	0.311	7.167	0.111	18.026	1.913	0.182	0.182	0.4	0.091	0.563	1	1	0.009	2.792	15.383	1.31843	0.000565507	83.298	readily biodegradable	0.582939	0.504872	0.640027	0.75069	0.996109	-0.0190268	1.3801
pyridinium	C207_A54	0.004	178.33	162.16	11.879	6.25	0.045	0.311	7.167	0.095	18.026	1.913	0.182	0.197	0.4	0.091	0.566	1	1	0.011	2.792	15.3819	1.32535	0.000533648	83.2922	readily biodegradable	0.582939	0.500196	0.689762	0.75199	0.996109	-0.0190268	1.3801
pyridinium	C205_A53	0.004	178.33	111.11	8.56	6.25	0.046	0.455	7.167	0.111	18.026	1.913	0.182	0.182	0.286	0.163	0.563	0	0	0.009	1.673	15.9855	1.37007	0.0010681	82.6434	readily biodegradable	0.976665	0.553104	0.703467	0.75069	0.969581	0.227203	1.34779
pyridinium	C207_A53	0.004	178.33	111.11	8.56	6.25	0.045	0.455	7.167	0.095	18.026	1.913	0.182	0.197	0.286	0.163	0.566	0	0	0.011	1.673	15.9843	1.37726	0.00100792	82.6374	readily biodegradable	0.976665	0.548428	0.753202	0.75199	0.969581	0.227203	1.34779
ammonium	C884_A24	0.004	232.44	152.03	12.595	8.617	0.082	0.531	9.75	0.345	23.09	1.756	0.246	0.206	-0.242	0.159	0.874	0	0	0.006	2.718	16.2674	2.41613	0.226191	81.0903	readily biodegradable	0.153933	0.984009	0.450801	0.885393	0.948108	-0.662846	1.1922
pyridinium	C205_A66	0.004	178.33	135.11	14.945	6.25	0.046	0.139	7.167	0.111	18.026	1.913	0.182	0.182	-0.172	0.133	0.563	0	0	0.009	2.622	19.6304	1.68247	0.000353495	78.6867	readily biodegradable	0.642754	0.447261	0.581422	0.75069	0.80853	0.0201583	1.31771
pyridinium	C207_A66	0.004	178.33	135.11	14.945	6.25	0.045	0.139	7.167	0.095	18.026	1.913	0.182	0.197	-0.172	0.133	0.566	0	0	0.011	2.622	19.6287	1.69127	0.000333573	78.6797	readily biodegradable	0.642754	0.442586	0.631158	0.75199	0.80853	0.0201583	1.31771
pyridinium	C205_A64	0.004	178.33	132.08	11.425	6.25	0.046	0.344	7.167	0.111	18.026	1.913	0.182	0.182	0.243	0.131	0.563	0	0	0.009	2.425	19.8725	1.70322	0.000837753	78.4234	readily biodegradable	0.71207	0.515925	0.648704	0.75069	0.797793	0.102112	1.34918
pyridinium	C207_A64	0.004	178.33	132.08	11.425	6.25	0.045	0.344	7.167	0.095	18.026	1.913	0.182	0.197	0.243	0.131	0.566	0	0	0.011	2.425	19.8707	1.71212	0.00079054	78.4164	readily biodegradable	0.71207	0.51125	0.69844	0.75199	0.797793	0.102112	1.34918
pyridinium	C205_A4	0.004	178.33	125.14	10.406	6.25	0.046	0.416	7.167	0.111	18.026	1.913	0.182	0.182	0.562	0.13	0.563	0	0	0.009	2	19.9935	1.71359	0.00113631	78.2918	readily biodegradable	0.861608	0.540041	0.668182	0.75069	0.792425	0.0823733	1.3184
pyridinium	C207_A4	0.004	178.33	125.14	10.406	6.25	0.045	0.416	7.167	0.095	18.026	1.913	0.182	0.197	0.562	0.13	0.566	0	0	0.011	2	19.9917	1.72254	0.00107227	78.2847	readily biodegradable	0.861608	0.535366	0.717917	0.75199	0.792425	0.0823733	1.3184
pyridinium	C205_A52	0.004	178.33	114.89	7.848	6.25	0.046	1.55	7.167	0.111	18.026	1.913	0.182	0.182	0.328	0.127	0.563	0	0	0.009	2.673	20.3307	1.74249	0.127711	77.7991	readily biodegradable	0.62481	0.919868	0.717076	0.75069	0.776319	0.0204725	1.25669
pyridinium	C207_A52	0.004	178.33	114.89	7.848	6.25	0.045	1.55	7.167	0.095	18.026	1.913	0.182	0.197	0.328	0.127	0.566	0	0	0.011	2.673	20.3303	1.75172	0.120522	77.7975	readily biodegradable	0.62481	0.915192	0.766811	0.75199	0.776319	0.0204725	1.25669
pyridinium	C205_A69	0.004	178.33	180.15	8.406	6.25	0.046	0.529	7.167	0.111	18.026	1.913	0.182	0.182	0.052	0.125	0.563	0	0	0.009	2.21	20.5982	1.76541	0.00187095	77.6345	readily biodegradable	0.787719	0.57789	0.70641	0.75069	0.765583	0.369073	1.627
pyridinium	C207_A69	0.004	178.33	180.15	8.406	6.25	0.045	0.529	7.167	0.095	18.026	1.913	0.182	0.197	0.052	0.125	0.566	0	0	0.011	2.21	20.5963	1.77464	0.0017655	77.6273	readily biodegradable	0.787719	0.573214	0.756145	0.75199	0.765583	0.369073	1.627
ammonium	C885_A66	0.003	246.47	135.11	14.945	9.117	0.085	0.139	10.25	0.463	24.616	1.77	0.223	0.18	-0.172	0.133	0.979	0	0	0.005	2.622	19.2557	3.44335	0.116491	77.1845	readily biodegradable	0.0505866	0.91683	0.328143	0.930872	0.80853	-1.2862	0.739789
ammonium	C885_A64	0.003	246.47	132.08	11.425	9.117	0.085	0.344	10.25	0.463	24.616	1.77	0.223	0.18	0.243	0.131	0.979	0	0	0.005	2.425	19.4578	3.4795	0.275574	76.7871	readily biodegradable	0.119902	0.985494	0.395425	0.930872	0.797793	-1.20424	0.771267
ammonium	C884_A69	0.004	232.44	180.15	8.406	8.617	0.082	0.529	9.75	0.345	23.09	1.756	0.246	0.206	0.052	0.125	0.874	0	0	0.006	2.21	20.2786	3.0119	0.279635	76.4299	readily biodegradable	0.332675	0.98334	0.53087	0.885393	0.765583	-0.839531	1.18964
pyridinium	C205_A65	0.004	178.33	124.16	12.137	6.25	0.046	0.435	7.167	0.111	18.026	1.913	0.182	0.182	0.403	0.12	0.563	0	1	0.009	1.98	23.6265	2.02496	0.00145293	74.3471	readily biodegradable	0.868645	0.546405	0.635095	0.75069	0.630765	0.0286699	1.2888
pyridinium	C207_A65	0.004	178.33	124.16	12.137	6.25	0.045	0.435	7.167	0.095	18.026	1.913	0.182	0.197	0.403	0.12	0.566	0	1	0.011	1.98	23.624	2.03552	0.00137103	74.3391	readily biodegradable	0.868645	0.54173	0.68483	0.75199	0.630765	0.0286699	1.2888
pyridinium	C205_A68	0.004	178.33	153.11	17.981	6.25	0.046	0.463	7.167	0.111	18.026	1.913	0.182	0.182	0.833	0.091	0.563	0	0	0.009	2.518	24.6942	2.11647	0.00170568	73.1876	readily biodegradable	0.679347	0.555783	0.523392	0.75069	0.583058	-0.133947	1.29573
pyridinium	C207_A68	0.004	178.33	153.11	17.981	6.25	0.045	0.463	7.167	0.095	18.026	1.913	0.182	0.197	0.833	0.091	0.566	0	0	0.011	2.518	24.6915	2.12749	0.00160952	73.1794	readily biodegradable	0.679347	0.551108	0.573127	0.75199	0.583058	-0.133947	1.29573
pyridinium	C205_A28	0.004	178.33	171.21	14.741	6.25	0.046	0.297	7.167	0.111	18.026	1.913	0.182	0.182	0.547	0.09	0.563	0	0	0.009	3.092	24.8145	2.12678	0.000860744	73.0579	readily biodegradable	0.477383	0.500183	0.585322	0.75069	0.577689	-0.182267	1.32652
pyridinium	C207_A28	0.004	178.33	171.21	14.741	6.25	0.045	0.297	7.167	0.095	18.026	1.913	0.182	0.197	0.547	0.09	0.566	0	0	0.011	3.092	24.8117	2.13785	0.000812217	73.0497	readily biodegradable	0.477383	0.495507	0.635057	0.75199	0.577689	-0.182267	1.32652
pyridinium	C205_A70	0.004	178.33	120.17	11.655	6.25	0.046	0.092	7.167	0.111	18.026	1.913	0.182	0.182	0.109	0.13	0.563	0	2	0.009	1.852	24.8418	2.12912	0.00036808	73.0287	readily biodegradable	0.913683	0.431519	0.644308	0.75069	0.576472	-0.0185712	1.2533
pyridinium	C207_A70	0.004	178.33	120.17	11.655	6.25	0.045	0.092	7.167	0.095	18.026	1.913	0.182	0.197	0.109	0.13	0.566	0	2	0.011	1.852	24.839	2.1402	0.000347328	73.0205	readily biodegradable	0.913683	0.426844	0.694043	0.75199	0.576472	-0.0185712	1.2533
pyridinium	C205_A62	0.004	178.33	121.12	10.465	6.25	0.046	0	7.167	0.111	18.026	1.913	0.182	0.182	0.308	0.085	0.563	0	0	0.009	2.513	25.4144	2.1782	0.000257072	72.4072	readily biodegradable	0.681107	0.400704	0.667054	0.75069	0.550847	-0.0590714	1.23609
pyridinium	C207_A62	0.004	178.33	121.12	10.465	6.25	0.045	0	7.167	0.095	18.026	1.913	0.182	0.197	0.308	0.085	0.566	0	0	0.011	2.513	25.4114	2.18953	0.000242578	72.3988	readily biodegradable	0.681107	0.396029	0.716789	0.75199	0.550847	-0.0590714	1.23609
ammonium	C885_A14	0.003	246.47	58.09	1.345	9.117	0.085	0	10.25	0.463	24.616	1.77	0.223	0.18	0.014	0	0.979	1	0	0.005	1.2517	23.4255	4.189	0.0796056	72.3059	readily biodegradable	0.532733	0.870273	0.588097	0.930872	0.615562	-1.05581	0.621055
ammonium	C886_A14	0.003	260.5	58.09	1.345	9.617	0.089	0	10.75	0.554	26.143	1.782	0.185	0.185	0.014	0	1.074	1	0	0.006	1.2517	23.2227	4.9122	0.185046	71.68	readily biodegradable	0.395519	0.939067	0.565379	0.972019	0.615562	-1.15333	0.48055
pyridinium	C201_A14	0.018	276.54	58.09	1.345	9.367	0.076	0	10.333	1.083	28.714	1.971	0.157	0.739	0.014	0	1.132	1	0	0.004	1.2517	23.128	5.42044	0.0636454	71.3879	readily biodegradable	0.164493	0.853242	0.269069	0.99714	0.615562	-0.786019	0.330954
ammonium	C885_A70	0.003	246.47	120.17	11.655	9.117	0.085	0.092	10.25	0.463	24.616	1.77	0.223	0.18	0.109	0.13	0.979	0	2	0.005	1.852	24.2509	4.33661	0.120717	71.2917	readily biodegradable	0.321515	0.901088	0.391029	0.930872	0.576472	-1.32493	0.675387
pyridinium	C205_A71	0.004	178.33	164.2	20.105	6.25	0.046	0.587	7.167	0.111	18.026	1.913	0.182	0.182	0.516	0.112	0.563	0	2	0.009	3.451	26.9972	2.31385	0.00311937	70.6859	readily biodegradable	0.351067	0.597316	0.482793	0.75069	0.479841	-0.220659	1.28628
pyridinium	C207_A71	0.004	178.33	164.2	20.105	6.25	0.045	0.587	7.167	0.095	18.026	1.913	0.182	0.197	0.516	0.112	0.566	0	2	0.011	3.451	26.9939	2.32588	0.00294348	70.6773	readily biodegradable	0.351067	0.592641	0.532528	0.75199	0.479841	-0.220659	1.28628
ammonium	C885_A62	0.003	246.47	121.12	10.465	9.117	0.085	0	10.25	0.463	24.616	1.77	0.223	0.18	0.308	0.085	0.979	0	0	0.005	2.513	24.806	4.43587	0.0842969	70.6738	readily biodegradable	0.0889388	0.870273	0.413775	0.930872	0.550847	-1.36543	0.658175
ammonium	C886_A70	0.003	260.5	120.17	11.655	9.617	0.089	0.092	10.75	0.554	26.143	1.782	0.185	0.185	0.109	0.13	1.074	0	2	0.006	1.852	24.0214	5.08115	0.280382	70.617	readily biodegradable	0.184301	0.969882	0.368312	0.972019	0.576472	-1.42245	0.534882
pyridinium	C205_A56	0.004	178.33	90.07	5.196	6.25	0.046	0	7.167	0.111	18.026	1.913	0.182	0.182	0.064	0.116	0.563	0	3	0.009	2.146	28.9212	2.47875	0.000292544	68.5998	readily biodegradable	0.810237	0.400704	0.767767	0.75069	0.393339	0.133271	1.23755
pyridinium	C207_A56	0.004	178.33	90.07	5.196	6.25	0.045	0	7.167	0.095	18.026	1.913	0.182	0.197	0.064	0.116	0.566	0	3	0.011	2.146	28.9174	2.49161	0.000276046	68.5908	readily biodegradable	0.810237	0.396029	0.817502	0.75199	0.393339	0.133271	1.23755
pyridinium	C205_A51	0.004	178.33	171.29	27.671	6.25	0.046	0.083	7.167	0.111	18.026	1.913	0.182	0.182	1.799	0.055	0.563	0	0	0.009	3.602	28.9998	2.48549	0.000413938	68.5143	readily biodegradable	0.297937	0.428504	0.338175	0.75069	0.389796	-0.302723	1.26703
pyridinium	C207_A51	0.004	178.33	171.29	27.671	6.25	0.045	0.083	7.167	0.095	18.026	1.913	0.182	0.197	1.799	0.055	0.566	0	0	0.011	3.602	28.9959	2.49838	0.000390594	68.5053	readily biodegradable	0.297937	0.423829	0.38791	0.75199	0.389796	-0.302723	1.26703
ammonium	C885_A56	0.003	246.47	90.07	5.196	9.117	0.085	0	10.25	0.463	24.616	1.77	0.223	0.18	0.064	0.116	0.979	0	3	0.005	2.146	28.1359	5.03133	0.0956128	66.7372	readily biodegradable	0.218069	0.870273	0.514488	0.930872	0.393339	-1.17309	0.659636
pyridinium	C205_A58	0.004	178.33	183.21	37.507	6.25	0.046	0.565	7.167	0.111	18.026	1.913	0.182	0.182	3.029	0.039	0.563	0	0	0.009	3.836	30.9019	2.64852	0.00325905	66.4463	readily biodegradable	0.215603	0.589948	0.150167	0.75069	0.303902	-0.406011	1.25186
pyridinium	C207_A58	0.004	178.33	183.21	37.507	6.25	0.045	0.565	7.167	0.095	18.026	1.913	0.182	0.197	3.029	0.039	0.566	0	0	0.011	3.836	30.8976	2.66223	0.00307523	66.4371	readily biodegradable	0.215603	0.585272	0.199903	0.75199	0.303902	-0.406011	1.25186
ammonium	C886_A56	0.003	260.5	90.07	5.196	9.617	0.089	0	10.75	0.554	26.143	1.782	0.185	0.185	0.064	0.116	1.074	0	3	0.006	2.146	27.8439	5.8897	0.221869	66.0445	readily biodegradable	0.0808555	0.939067	0.491771	0.972019	0.393339	-1.27061	0.519131
pyridinium	C205_A3	0.004	178.33	280.17	17.864	6.25	0.046	0.792	7.167	0.111	18.026	1.913	0.182	0.182	-0.358	0.071	0.563	0	2	0.009	4.087	31.8762	2.73202	0.00862235	65.3832	readily biodegradable	0.127287	0.66598	0.525628	0.75069	0.259738	0.0972215	1.79475
pyridinium	C207_A3	0.004	178.33	280.17	17.864	6.25	0.045	0.792	7.167	0.095	18.026	1.913	0.182	0.197	-0.358	0.071	0.566	0	2	0.011	4.087	31.8717	2.74616	0.00813601	65.374	readily biodegradable	0.127287	0.661305	0.575363	0.75199	0.259738	0.0972215	1.79475
pyridinium	C205_A27	0.004	178.33	59.05	6.313	6.25	0.046	0.027	7.167	0.111	18.026	1.913	0.182	0.182	0.292	0	0.563	0	0	0.009	2.801	35.5149	3.04388	0.000401827	61.4408	readily biodegradable	0.579772	0.409748	0.746416	0.75069	0.0945348	0.224163	1.18879
pyridinium	C205_A15	0.004	178.33	95.11	7.497	6.25	0.046	0.538	7.167	0.111	18.026	1.913	0.182	0.182	0.291	0	0.563	0	0	0.009	4.4469	35.5138	3.04379	0.00334849	61.439	readily biodegradable	0.000654614	0.580904	0.723785	0.75069	0.0945348	0.215152	1.29341
pyridinium	C205_A79	0.004	178.33	200.73	4.223	6.25	0.046	0.575	7.167	0.111	18.026	1.913	0.182	0.182	0.124	0	0.563	0	0	0.009	3.5528	35.5136	3.04378	0.00390409	61.4387	readily biodegradable	0.315248	0.593297	0.786365	0.75069	0.0945348	0.115475	1.56348
pyridinium	C207_A27	0.004	178.33	59.05	6.313	6.25	0.045	0.027	7.167	0.095	18.026	1.913	0.182	0.197	0.292	0	0.566	0	0	0.011	2.801	35.5091	3.05957	0.000379155	61.4309	readily biodegradable	0.579772	0.405072	0.796152	0.75199	0.0945348	0.224163	1.18879
pyridinium	C207_A15	0.004	178.33	95.11	7.497	6.25	0.045	0.538	7.167	0.095	18.026	1.913	0.182	0.197	0.291	0	0.566	0	0	0.011	4.4469	35.5082	3.05949	0.00315956	61.4292	readily biodegradable	0.000654614	0.576229	0.77352	0.75199	0.0945348	0.215152	1.29341
pyridinium	C207_A79	0.004	178.33	200.73	4.223	6.25	0.045	0.575	7.167	0.095	18.026	1.913	0.182	0.197	0.124	0	0.566	0	0	0.011	3.5528	35.508	3.05947	0.00368382	61.4289	readily biodegradable	0.315248	0.588622	0.8361	0.75199	0.0945348	0.115475	1.56348
pyridinium	C205_A60	0.004	178.33	212.28	25.293	6.25	0.046	0.389	7.167	0.111	18.026	1.913	0.182	0.182	1.154	0.06	0.563	0	3	0.009	4.018	35.5544	3.04727	0.00180654	61.3965	readily biodegradable	0.151565	0.530997	0.383628	0.75069	0.0927095	-0.295534	1.39459
pyridinium	C207_A60	0.004	178.33	212.28	25.293	6.25	0.045	0.389	7.167	0.095	18.026	1.913	0.182	0.197	1.154	0.06	0.566	0	3	0.011	4.018	35.5487	3.06298	0.00170461	61.3866	readily biodegradable	0.151565	0.526322	0.433364	0.75199	0.0927095	-0.295534	1.39459
pyridinium	C205_A59	0.004	178.33	206.32	27.302	6.25	0.046	0.438	7.167	0.111	18.026	1.913	0.182	0.182	1.59	0.059	0.563	0	3	0.009	4.118	35.672	3.05735	0.00222116	61.2684	readily biodegradable	0.11638	0.54741	0.345228	0.75069	0.0873411	-0.346432	1.35132
pyridinium	C207_A59	0.004	178.33	206.32	27.302	6.25	0.045	0.438	7.167	0.095	18.026	1.913	0.182	0.197	1.59	0.059	0.566	0	3	0.011	4.118	35.6663	3.07311	0.00209583	61.2585	readily biodegradable	0.11638	0.542734	0.394963	0.75199	0.0873411	-0.346432	1.35132
ammonium	C884_A55	0.004	232.44	62.01	2.925	8.617	0.082	0	9.75	0.345	23.09	1.756	0.246	0.206	0.013	0	0.874	0	0	0.006	1.214	34.7214	5.15705	0.0533205	60.0682	readily biodegradable	0.683122	0.806154	0.635635	0.885393	0.0945348	-0.483942	1.00861
ammonium	C884_A57	0.004	232.44	96.07	4.388	8.617	0.082	0.517	9.75	0.345	23.09	1.756	0.246	0.206	0.208	0	0.874	0	0	0.006	1.303	34.5823	5.13639	0.453717	59.8276	readily biodegradable	0.651807	0.97932	0.607671	0.885393	0.0945348	-0.602599	1.0528
ammonium	C885_A33	0.003	246.47	45.02	2.927	9.117	0.085	0	10.25	0.463	24.616	1.77	0.223	0.18	-0.03	0	0.979	0	0	0.005	1.42	34.338	6.14041	0.116689	59.4049	readily biodegradable	0.473516	0.870273	0.557858	0.930872	0.0945348	-0.852502	0.682344
ammonium	C885_A55	0.003	246.47	62.01	2.925	9.117	0.085	0	10.25	0.463	24.616	1.77	0.223	0.18	0.013	0	0.979	0	0	0.005	1.214	34.338	6.14041	0.116689	59.4049	readily biodegradable	0.545998	0.870273	0.557896	0.930872	0.0945348	-0.581694	0.868045
ammonium	C885_A67	0.003	246.47	197.65	2.652	9.117	0.085	0	10.25	0.463	24.616	1.77	0.223	0.18	0.057	0	0.979	0	0	0.005	0.863	34.338	6.14041	0.116689	59.4049	readily biodegradable	0.669499	0.870273	0.563114	0.930872	0.0945348	-1.2455	0.949161
ammonium	C886_A33	0.003	260.5	45.02	2.927	9.617	0.089	0	10.75	0.554	26.143	1.782	0.185	0.185	-0.03	0	1.074	0	0	0.006	1.42	33.9041	7.17159	0.270159	58.6542	readily biodegradable	0.336302	0.939067	0.535141	0.972019	0.0945348	-0.950024	0.54184
ammonium	C886_A55	0.003	260.5	62.01	2.925	9.617	0.089	0	10.75	0.554	26.143	1.782	0.185	0.185	0.013	0	1.074	0	0	0.006	1.214	33.9041	7.17159	0.270159	58.6542	readily biodegradable	0.408784	0.939067	0.535179	0.972019	0.0945348	-0.679215	0.72754
ammonium	C886_A67	0.003	260.5	197.65	2.652	9.617	0.089	0	10.75	0.554	26.143	1.782	0.185	0.185	0.057	0	1.074	0	0	0.006	0.863	33.9041	7.17159	0.270159	58.6542	readily biodegradable	0.532285	0.939067	0.540397	0.972019	0.0945348	-1.34303	0.808656
pyridinium	C214_A55	0.004	262.51	62.01	2.925	9.25	0.068	0	10.167	0.679	27.187	1.94	0.212	0.206	0.013	0	1.103	0	0	0.005	1.214	33.8506	7.53696	0.0506883	58.5617	readily biodegradable	0.314972	0.804118	0.454075	0.984579	0.0945348	-0.165065	0.700826
imidazolium	C387_A55	-0.02	283.56	62.01	2.925	8.6	0.082	0	10.167	0.839	26.869	1.94	0.22	0.232	0.013	0	1.117	0	0	0.005	1.214	33.7868	7.71126	0.0508019	58.4512	readily biodegradable	0.343547	0.804451	0.377171	0.990643	0.0945348	0.158821	0.399279
imidazolium	C402_A55	-0.02	283.56	62.01	2.925	8.6	0.082	0	10.167	0.838	26.869	1.94	0.183	0.252	0.013	0	1.117	0	0	0.005	1.214	33.7868	7.71126	0.0508019	58.4512	readily biodegradable	0.343547	0.804451	0.377651	0.990643	0.0945348	0.158821	0.399279
pyridinium	C214_A57	0.004	262.51	96.07	4.388	9.25	0.068	0.517	10.167	0.679	27.187	1.94	0.212	0.206	0.208	0	1.103	0	0	0.005	1.303	33.7217	7.50825	0.431405	58.3386	readily biodegradable	0.283657	0.977284	0.426111	0.984579	0.0945348	-0.283722	0.745014
pyridinium	C201_A33	0.018	276.54	45.02	2.927	9.367	0.076	0	10.333	1.083	28.714	1.971	0.157	0.739	-0.03	0	1.132	0	0	0.004	1.42	33.7027	7.89879	0.0927455	58.3058	readily biodegradable	0.105276	0.853242	0.238831	0.99714	0.0945348	-0.582713	0.392243
pyridinium	C201_A55	0.018	276.54	62.01	2.925	9.367	0.076	0	10.333	1.083	28.714	1.971	0.157	0.739	0.013	0	1.132	0	0	0.004	1.214	33.7027	7.89879	0.0927455	58.3058	readily biodegradable	0.177758	0.853242	0.238869	0.99714	0.0945348	-0.311904	0.577944
pyridinium	C201_A67	0.018	276.54	197.65	2.652	9.367	0.076	0	10.333	1.083	28.714	1.971	0.157	0.739	0.057	0	1.132	0	0	0.004	0.863	33.7027	7.89879	0.0927455	58.3058	readily biodegradable	0.301259	0.853242	0.244087	0.99714	0.0945348	-0.975715	0.65906
imidazolium	C387_A57	-0.02	283.56	96.07	4.388	8.6	0.082	0.517	10.167	0.839	26.869	1.94	0.22	0.232	0.208	0	1.117	0	0	0.005	1.303	33.6578	7.68182	0.432367	58.228	readily biodegradable	0.312232	0.977617	0.349207	0.990643	0.0945348	0.0401638	0.443467
imidazolium	C402_A57	-0.02	283.56	96.07	4.388	8.6	0.082	0.517	10.167	0.838	26.869	1.94	0.183	0.252	0.208	0	1.117	0	0	0.005	1.303	33.6578	7.68182	0.432367	58.228	readily biodegradable	0.312232	0.977617	0.349687	0.990643	0.0945348	0.0401638	0.443467
piperazinium	C869_A59	0.091	129.26	206.32	27.302	5.45	0.079	0.438	5.583	0	12.994	1.793	0.219	0.242	1.59	0.059	0.298	0	3	0.005	4.118	59.6485	3.2	0.00930465	37.1422	not readily biodegradable	0.568548	0.621545	0.314491	0.635912	0.978738	-1.24674	2.04958
piperazinium	C871_A59	0.076	157.32	206.32	27.302	6.45	0.075	0.438	6.583	0.01	16.047	1.829	0.2	0.208	1.59	0.059	0.676	0	3	0.012	4.118	58.0991	6.08063	0.024869	35.7954	not readily biodegradable	0.29421	0.70303	0.456841	0.799634	0.9751	-1.4298	1.76408
piperazinium	C870_A59	0.082	143.29	206.32	27.302	5.95	0.072	0.438	6.083	0	14.521	1.813	0.209	0.209	1.59	0.059	0.391	0	3	0.007	4.118	60.6209	3.83335	0.011726	35.534	not readily biodegradable	0.431334	0.638911	0.356536	0.676193	0.95799	-1.33205	1.90464
piperazinium	C865_A51	0.029	157.32	171.29	27.671	5.7	0.081	0.083	5.833	0.213	16.047	1.948	0.184	0.235	1.799	0.055	0.525	0	0	0.01	3.602	60.2447	4.82792	0.00329887	34.924	not readily biodegradable	0.475767	0.537037	0.310171	0.734232	0.954173	-1.38609	1.67979
piperazinium	C872_A51	0.07	171.35	171.29	27.671	6.95	0.081	0.083	7.083	0.074	17.574	1.843	0.208	0.208	1.799	0.055	0.859	0	0	0.009	3.602	56.864	8.22476	0.0146904	34.8966	not readily biodegradable	0.338553	0.662269	0.355959	0.878896	0.973748	-1.4714	1.53484
imidazolium	C57_A68	0.024	237.46	153.11	17.981	7.95	0.086	0.463	8.833	0.878	24.155	1.966	0.19	0.547	0.833	0.091	1.039	0	0	0.004	2.518	54.9111	10.9182	0.317235	33.8535	not readily biodegradable	0.128604	0.91311	0.0496191	0.956859	0.975326	-1.03786	0.811862
piperazinium	C866_A51	0.027	171.35	171.29	27.671	6.2	0.085	0.083	6.333	0.309	17.574	1.953	0.179	0.193	1.799	0.055	0.668	0	0	0.008	3.602	61.2543	6.32081	0.00786493	32.417	not readily biodegradable	0.338553	0.605831	0.221983	0.796169	0.922759	-1.4714	1.53484
pyridinium	C219_A51	0.029	164.3	171.29	27.671	6.2	0.042	0.083	7	0.146	16.499	1.861	0.206	0.169	1.799	0.055	0.472	0	0	0.008	3.602	63.1374	4.60717	0.00067184	32.2548	not readily biodegradable	0.435151	0.404794	0.30033	0.711276	0.910569	-0.132475	1.38517
piperazinium	C864_A51	0.031	143.29	171.29	27.671	5.2	0.084	0.083	5.333	0.072	14.521	1.943	0.19	0.209	1.799	0.055	0.288	0	0	0.008	3.602	64.3822	3.39342	0.00225513	32.2222	not readily biodegradable	0.612891	0.50097	0.335898	0.63158	0.903475	-1.28834	1.82035
piperazinium	C865_A59	0.029	157.32	206.32	27.302	5.7	0.081	0.438	5.833	0.213	16.047	1.948	0.184	0.235	1.59	0.059	0.525	0	3	0.01	4.118	63.7732	5.11069	0.0152333	31.1009	not readily biodegradable	0.29421	0.655942	0.317224	0.734232	0.894523	-1.4298	1.76408
piperazinium	C872_A59	0.07	171.35	206.32	27.302	6.95	0.081	0.438	7.083	0.074	17.574	1.843	0.208	0.208	1.59	0.059	0.859	0	3	0.009	4.118	60.1728	8.70336	0.067812	31.056	not readily biodegradable	0.156996	0.781175	0.363012	0.878896	0.914098	-1.51511	1.61914
piperazinium	C873_A60	0.065	185.38	212.28	25.293	7.45	0.078	0.389	7.583	0.111	19.101	1.855	0.174	0.174	1.154	0.06	0.865	0	3	0.009	4.018	61.0289	8.92132	0.0877375	29.962	not readily biodegradable	0.0549672	0.800829	0.383628	0.881495	0.89683	-1.56173	1.5219
piperazinium	C869_A60	0.091	129.26	212.28	25.293	5.45	0.079	0.389	5.583	0	12.994	1.793	0.219	0.242	1.154	0.06	0.298	0	3	0.005	4.018	67.214	3.60587	0.00855582	29.1716	not readily biodegradable	0.603733	0.605133	0.352891	0.635912	0.854301	-1.19584	2.09286
imidazolium	C57_A4	0.024	237.46	125.14	10.406	7.95	0.086	0.416	8.833	0.878	24.155	1.966	0.19	0.547	0.562	0.13	1.039	0	0	0.004	2	58.9563	11.7225	0.280257	29.041	not readily biodegradable	0.310865	0.897368	0.194409	0.956859	0.897981	-0.821538	0.834531
piperazinium	C866_A59	0.027	171.35	206.32	27.302	6.2	0.085	0.438	6.333	0.309	17.574	1.953	0.179	0.193	1.59	0.059	0.668	0	3	0.008	4.118	64.5578	6.6617	0.036159	28.7444	not readily biodegradable	0.156996	0.724736	0.229036	0.796169	0.863109	-1.51511	1.61914
pyridinium	C219_A59	0.029	164.3	206.32	27.302	6.2	0.042	0.438	7	0.146	16.499	1.861	0.206	0.169	1.59	0.059	0.472	0	3	0.008	4.118	66.5431	4.85569	0.00308882	28.5981	not readily biodegradable	0.253594	0.523699	0.307383	0.711276	0.850919	-0.176184	1.46946
piperazinium	C863_A51	0.034	129.26	171.29	27.671	4.7	0.085	0.083	4.833	0	12.994	1.937	0.208	0.219	1.799	0.055	0.002	0	0	0.006	3.602	69.2218	2.20052	0.00138134	28.5763	not readily biodegradable	0.750105	0.455552	0.32846	0.507706	0.837088	-1.20303	1.96529
piperazinium	C864_A59	0.031	143.29	206.32	27.302	5.2	0.084	0.438	5.333	0.072	14.521	1.943	0.19	0.209	1.59	0.059	0.288	0	3	0.008	4.118	67.8492	3.57616	0.0103672	28.5642	not readily biodegradable	0.431334	0.619875	0.342951	0.63158	0.843825	-1.33205	1.90464
imidazolium	C31_A68	0.04	237.46	153.11	17.981	8.4	0.061	0.463	9.167	0.401	24.155	1.933	0.164	0.307	0.833	0.091	1.038	0	0	0.006	2.518	59.8848	11.8861	0.142155	28.087	not readily biodegradable	0.128604	0.841312	0.320935	0.956426	0.881048	-1.03786	0.811862
piperazinium	C871_A60	0.076	157.32	212.28	25.293	6.45	0.075	0.389	6.583	0.01	16.047	1.829	0.2	0.208	1.154	0.06	0.676	0	3	0.012	4.018	65.1697	6.82063	0.0227633	27.9869	not readily biodegradable	0.329395	0.686618	0.495241	0.799634	0.850662	-1.3789	1.80735
piperazinium	C870_A60	0.082	143.29	212.28	25.293	5.95	0.072	0.389	6.083	0	14.521	1.813	0.209	0.209	1.154	0.06	0.391	0	3	0.007	4.018	67.9356	4.29589	0.0107233	27.7578	not readily biodegradable	0.466519	0.622499	0.394936	0.676193	0.833552	-1.28115	1.94791
piperazinium	C869_A61	0.091	129.26	224.29	25.854	5.45	0.079	0.438	5.583	0	12.994	1.793	0.219	0.242	1.061	0.077	0.298	0	3	0.005	4.486	68.7026	3.68573	0.010717	27.601	not readily biodegradable	0.439065	0.621545	0.342168	0.635912	0.827758	-1.23339	2.11057
imidazolium	C40_A68	0.04	237.46	153.11	17.981	8.4	0.059	0.463	9.167	0.345	24.155	1.933	0.153	0.253	0.833	0.091	1.048	0	0	0.008	2.518	60.155	12.1527	0.127178	27.5652	not readily biodegradable	0.128604	0.831962	0.389897	0.960757	0.873023	-1.03786	0.811862
piperazinium	C862_A51	0.037	115.23	171.29	27.671	4.2	0.086	0.083	4.333	0	11.467	1.929	0.207	0.181	1.799	0.055	0.002	0	0	0.005	3.602	70.6788	2.24683	0.000803526	27.0736	not readily biodegradable	0.887319	0.410135	0.307438	0.507706	0.811454	-1.07937	2.09297
piperazinium	C871_A61	0.076	157.32	224.29	25.854	6.45	0.075	0.438	6.583	0.01	16.047	1.829	0.2	0.208	1.061	0.077	0.676	0	3	0.012	4.486	66.5518	6.96528	0.0284871	26.4545	not readily biodegradable	0.164727	0.70303	0.484518	0.799634	0.82412	-1.41645	1.82506
piperazinium	C379_A51	0.034	144.28	171.29	27.671	4.833	0.068	0.083	5.75	0	14.015	1.866	0.233	0.202	1.799	0.055	0.348	0	0	0.004	3.602	69.4843	4.07218	0.000610985	26.443	not readily biodegradable	0.658359	0.389397	0.286415	0.657568	0.809226	-1.03772	1.76565
imidazolium	C57_A65	0.024	237.46	124.16	12.137	7.95	0.086	0.435	8.833	0.878	24.155	1.966	0.19	0.547	0.403	0.12	1.039	0	1	0.004	1.98	61.1303	12.1548	0.314428	26.4005	not readily biodegradable	0.317902	0.903732	0.161323	0.956859	0.852601	-0.875242	0.804933
imidazolium	C20_A68	0.043	223.43	153.11	17.981	7.9	0.063	0.463	8.667	0.457	22.628	1.929	0.195	0.402	0.833	0.091	0.972	0	0	0.006	2.518	62.4788	11.0352	0.0895334	26.3964	not readily biodegradable	0.265818	0.80057	0.294019	0.92784	0.84504	-0.891019	0.934743
imidazolium	C57_A54	0.024	237.46	162.16	11.879	7.95	0.086	0.311	8.833	0.878	24.155	1.966	0.19	0.547	0.4	0.091	1.039	1	1	0.004	2.792	61.2479	12.1782	0.188325	26.3856	not readily biodegradable	0.0321961	0.862199	0.166254	0.956859	0.851745	-0.922939	0.896232
piperazinium	C870_A61	0.082	143.29	224.29	25.854	5.95	0.072	0.438	6.083	0	14.521	1.813	0.209	0.209	1.061	0.077	0.391	0	3	0.007	4.486	69.371	4.38666	0.0134186	26.2289	not readily biodegradable	0.301851	0.638911	0.384213	0.676193	0.80701	-1.3187	1.96562
piperazinium	C863_A59	0.034	129.26	206.32	27.302	4.7	0.085	0.438	4.833	0	12.994	1.937	0.208	0.219	1.59	0.059	0.002	0	3	0.006	4.118	72.5452	2.30617	0.00631505	25.1423	not readily biodegradable	0.568548	0.574457	0.335513	0.507706	0.777439	-1.24674	2.04958
imidazolium	C57_A62	0.024	237.46	121.12	10.465	7.95	0.086	0	8.833	0.878	24.155	1.966	0.19	0.547	0.308	0.085	1.039	0	0	0.004	2.513	62.548	12.4367	0.0529186	24.9624	not readily biodegradable	0.130364	0.758031	0.193282	0.956859	0.825487	-0.962983	0.752222
piperazinium	C867_A51	0.025	185.38	171.29	27.671	6.7	0.088	0.083	6.833	0.357	19.101	1.956	0.2	0.18	1.799	0.055	0.771	0	0	0.007	3.602	66.8439	8.27526	0.0189924	24.8618	not readily biodegradable	0.201339	0.66995	0.17789	0.840781	0.801413	-1.56892	1.39434
imidazolium	C57_A27	0.024	237.46	59.05	6.313	7.95	0.086	0.027	8.833	0.878	24.155	1.966	0.19	0.547	0.292	0	1.039	0	0	0.004	2.801	62.7515	12.4771	0.0593846	24.7119	not readily biodegradable	0.0290294	0.767075	0.272644	0.956859	0.820921	-0.679749	0.704921
piperazinium	C873_A68	0.065	185.38	153.11	17.981	7.45	0.078	0.463	7.583	0.111	19.101	1.855	0.174	0.174	0.833	0.091	0.865	0	0	0.009	2.518	65.6061	9.59042	0.128216	24.6752	not readily biodegradable	0.582749	0.825615	0.523392	0.881495	0.805215	-1.40014	1.42305
imidazolium	C57_A49	0.024	237.46	95.11	7.497	7.95	0.086	0.538	8.833	0.878	24.155	1.966	0.19	0.547	0.291	0	1.039	0	0	0.004	1.258	62.4923	12.4256	0.49283	24.5893	not readily biodegradable	0.571941	0.938231	0.250013	0.956859	0.820635	-0.688759	0.809537
imidazolium	C57_A53	0.024	237.46	111.11	8.56	7.95	0.086	0.455	8.833	0.878	24.155	1.966	0.19	0.547	0.286	0.163	1.039	0	0	0.004	1.673	62.6463	12.4562	0.350107	24.5474	not readily biodegradable	0.425922	0.910431	0.229694	0.956859	0.819208	-0.676709	0.863915
imidazolium	C57_A64	0.024	237.46	132.08	11.425	7.95	0.086	0.344	8.833	0.878	24.155	1.966	0.19	0.547	0.243	0.131	1.039	0	0	0.004	2.425	63.2761	12.5814	0.223112	23.9193	not readily biodegradable	0.161327	0.873252	0.174932	0.956859	0.806936	-0.801799	0.865314
imidazolium	C57_A63	0.024	237.46	87.06	8.284	7.95	0.086	0.482	8.833	0.878	24.155	1.966	0.19	0.547	0.245	0.152	1.039	0	0	0.004	1.495	63.142	12.5548	0.394709	23.9086	not readily biodegradable	0.488552	0.919474	0.23497	0.956859	0.807507	-0.712318	0.773502
piperazinium	C865_A60	0.029	157.32	212.28	25.293	5.7	0.081	0.389	5.833	0.213	16.047	1.948	0.184	0.235	1.154	0.06	0.525	0	3	0.01	4.018	70.4501	5.64577	0.0137322	23.8904	not readily biodegradable	0.329395	0.63953	0.355624	0.734232	0.770086	-1.3789	1.80735
piperazinium	C872_A60	0.07	171.35	212.28	25.293	6.95	0.081	0.389	7.083	0.074	17.574	1.843	0.208	0.208	1.154	0.06	0.859	0	3	0.009	4.018	66.4512	9.61146	0.0611098	23.8762	not readily biodegradable	0.192181	0.764762	0.401413	0.878896	0.789661	-1.46421	1.66241
imidazolium	C31_A4	0.04	237.46	125.14	10.406	8.4	0.061	0.416	9.167	0.401	24.155	1.933	0.164	0.307	0.562	0.13	1.038	0	0	0.006	2	63.4968	12.603	0.124023	23.7762	not readily biodegradable	0.310865	0.82557	0.465725	0.956426	0.803703	-0.821538	0.834531
piperazinium	C862_A59	0.037	115.23	206.32	27.302	4.2	0.086	0.438	4.333	0	11.467	1.929	0.207	0.181	1.59	0.059	0.002	0	3	0.005	4.118	73.91	2.34955	0.00366542	23.7368	not readily biodegradable	0.705762	0.52904	0.314491	0.507706	0.751804	-1.12308	2.17726
imidazolium	C57_A57	0.024	237.46	96.07	4.388	7.95	0.086	0.517	8.833	0.878	24.155	1.966	0.19	0.547	0.208	0	1.039	0	0	0.004	1.303	63.5666	12.6392	0.459471	23.3347	not readily biodegradable	0.556108	0.931197	0.309439	0.956859	0.796947	-0.297905	1.00628
imidazolium	C40_A4	0.04	237.46	125.14	10.406	8.4	0.059	0.416	9.167	0.345	24.155	1.933	0.153	0.253	0.562	0.13	1.048	0	0	0.008	2	63.7151	12.8719	0.110838	23.3021	not readily biodegradable	0.310865	0.816219	0.534687	0.960757	0.795678	-0.821538	0.834531
piperazinium	C874_A68	0.06	199.41	153.11	17.981	7.95	0.08	0.463	8.083	0.155	20.628	1.865	0.2	0.277	0.833	0.091	0.872	0	0	0.01	2.518	66.5945	9.85612	0.271795	23.2776	not readily biodegradable	0.445535	0.885059	0.523265	0.884527	0.780323	-1.51011	1.28692
piperazinium	C379_A59	0.034	144.28	206.32	27.302	4.833	0.068	0.438	5.75	0	14.015	1.866	0.233	0.202	1.59	0.059	0.348	0	3	0.004	4.118	72.5862	4.25397	0.00278425	23.1571	not readily biodegradable	0.476802	0.508302	0.293469	0.657568	0.749576	-1.08143	1.84994
piperazinium	C871_A68	0.076	157.32	153.11	17.981	6.45	0.075	0.463	6.583	0.01	16.047	1.829	0.2	0.208	0.833	0.091	0.676	0	0	0.012	2.518	69.7689	7.30198	0.0331284	22.896	not readily biodegradable	0.857177	0.711404	0.635005	0.799634	0.759047	-1.21731	1.70849
imidazolium	C435_A68	0.04	237.46	153.11	17.981	8.4	0.056	0.463	9.167	0.336	24.155	1.933	0.164	0.225	0.833	0.091	1.049	0	0	0.01	2.518	64.0378	12.96	0.113794	22.8884	not readily biodegradable	0.128604	0.817936	0.436267	0.96119	0.787877	-1.03786	0.811862
piperazinium	C870_A68	0.082	143.29	153.11	17.981	5.95	0.072	0.463	6.083	0	14.521	1.813	0.209	0.209	0.833	0.091	0.391	0	0	0.007	2.518	72.7132	4.598	0.0156024	22.6732	not readily biodegradable	0.994302	0.647285	0.534699	0.676193	0.741937	-1.11956	1.84906
piperazinium	C865_A61	0.029	157.32	224.29	25.854	5.7	0.081	0.438	5.833	0.213	16.047	1.948	0.184	0.235	1.061	0.077	0.525	0	3	0.01	4.486	71.7515	5.75006	0.0171391	22.4813	not readily biodegradable	0.164727	0.655942	0.344901	0.734232	0.743543	-1.41645	1.82506
piperazinium	C872_A61	0.07	171.35	224.29	25.854	6.95	0.081	0.438	7.083	0.074	17.574	1.843	0.208	0.208	1.061	0.077	0.859	0	3	0.009	4.486	67.662	9.78659	0.076252	22.4751	not readily biodegradable	0.0275132	0.781175	0.39069	0.878896	0.763118	-1.50176	1.68012
imidazolium	C20_A4	0.043	223.43	125.14	10.406	7.9	0.063	0.416	8.667	0.457	22.628	1.929	0.195	0.402	0.562	0.13	0.972	0	0	0.006	2	66.0277	11.662	0.0778546	22.2324	not readily biodegradable	0.448079	0.784827	0.438809	0.92784	0.767695	-0.674699	0.957412
imidazolium	C20_A28	0.043	223.43	171.21	14.741	7.9	0.063	0.297	8.667	0.457	22.628	1.929	0.195	0.402	0.547	0.09	0.972	0	0	0.006	3.092	66.2338	11.6984	0.0476651	22.0201	not readily biodegradable	0.0638536	0.744969	0.355949	0.92784	0.763414	-0.939339	0.965534
imidazolium	C57_A70	0.024	237.46	120.17	11.655	7.95	0.086	0.092	8.833	0.878	24.155	1.966	0.19	0.547	0.109	0.13	1.039	0	2	0.004	1.852	65.0287	12.9299	0.0805905	21.9608	not readily biodegradable	0.36294	0.788846	0.170536	0.956859	0.768691	-0.922483	0.769434
pyrrolidinium	C181_A68	0.035	212.45	153.11	17.981	8.25	0.097	0.463	8.25	0.128	22.66	1.91	0.176	0.221	0.833	0.091	0.928	0	0	0.008	2.518	66.2262	10.8217	1.04987	21.9022	not readily biodegradable	0.262943	0.994594	0.494198	0.908782	0.761648	-1.72926	1.14094
piperazinium	C866_A60	0.027	171.35	212.28	25.293	6.2	0.085	0.389	6.333	0.309	17.574	1.953	0.179	0.193	1.154	0.06	0.668	0	3	0.008	4.018	70.8003	7.30586	0.0323598	21.8615	not readily biodegradable	0.192181	0.708324	0.267437	0.796169	0.738672	-1.46421	1.66241
pyridinium	C219_A60	0.029	164.3	212.28	25.293	6.2	0.042	0.389	7	0.146	16.499	1.861	0.206	0.169	1.154	0.06	0.472	0	3	0.008	4.018	72.9576	5.32376	0.00276351	21.7159	not readily biodegradable	0.288779	0.507287	0.345783	0.711276	0.726482	-0.125286	1.51273
piperazinium	C867_A59	0.025	185.38	206.32	27.302	6.7	0.088	0.438	6.833	0.357	19.101	1.956	0.2	0.18	1.59	0.059	0.771	0	3	0.007	4.118	69.6043	8.617	0.0862707	21.6924	not readily biodegradable	0.0197817	0.788855	0.184943	0.840781	0.741763	-1.61263	1.47863
piperazinium	C864_A60	0.031	143.29	212.28	25.293	5.2	0.084	0.389	5.333	0.072	14.521	1.943	0.19	0.209	1.154	0.06	0.288	0	3	0.008	4.018	74.3956	3.92121	0.00927608	21.674	not readily biodegradable	0.466519	0.603463	0.381352	0.63158	0.719388	-1.28115	1.94791
pyridinium	C210_A51	0.027	178.33	171.29	27.671	6.283	0.045	0.083	7.167	0.11	18.026	1.913	0.241	0.231	1.799	0.055	0.552	0	0	0.011	3.602	72.2637	6.07424	0.00101413	21.6611	not readily biodegradable	0.297937	0.427135	0.3807	0.745926	0.728812	-0.302723	1.26703
imidazolium	C31_A65	0.04	237.46	124.16	12.137	8.4	0.061	0.435	9.167	0.401	24.155	1.933	0.164	0.307	0.403	0.12	1.038	0	1	0.006	1.98	65.4425	12.9892	0.138309	21.43	not readily biodegradable	0.317902	0.831934	0.432639	0.956426	0.758323	-0.875242	0.804933
imidazolium	C31_A54	0.04	237.46	162.16	11.879	8.4	0.061	0.311	9.167	0.401	24.155	1.933	0.164	0.307	0.4	0.091	1.038	1	1	0.006	2.792	65.5147	13.0035	0.0827716	21.399	not readily biodegradable	0.0321961	0.790401	0.43757	0.956426	0.757467	-0.922939	0.896232
imidazolium	C57_A56	0.024	237.46	90.07	5.196	7.95	0.086	0	8.833	0.878	24.155	1.966	0.19	0.547	0.064	0.116	1.039	0	3	0.004	2.146	65.5851	13.0405	0.0554882	21.3189	not readily biodegradable	0.259494	0.758031	0.293994	0.956859	0.755848	-0.770641	0.753683
imidazolium	C57_A67	0.024	237.46	197.65	2.652	7.95	0.086	0	8.833	0.878	24.155	1.966	0.19	0.547	0.057	0	1.039	0	0	0.004	0.863	65.6683	13.0571	0.0555585	21.2191	not readily biodegradable	0.710924	0.758031	0.342621	0.956859	0.75385	-0.843059	1.04321
imidazolium	C41_A57	0.038	251.49	96.07	4.388	8.9	0.062	0.517	9.667	0.41	25.681	1.937	0.171	0.393	0.208	0	1.107	0	0	0.008	1.303	64.1319	14.3805	0.375389	21.1122	not readily biodegradable	0.418984	0.914167	0.618474	0.986312	0.760101	-0.394176	0.861701
imidazolium	C57_A69	0.024	237.46	180.15	8.406	7.95	0.086	0.529	8.833	0.878	24.155	1.966	0.19	0.547	0.052	0.125	1.039	0	0	0.004	2.21	65.4372	13.0111	0.497139	21.0546	not readily biodegradable	0.236976	0.935217	0.232638	0.956859	0.752423	-0.534838	1.14313
imidazolium	C40_A65	0.04	237.46	124.16	12.137	8.4	0.059	0.435	9.167	0.345	24.155	1.933	0.153	0.253	0.403	0.12	1.048	0	1	0.008	1.98	65.6331	13.2594	0.12354	20.984	not readily biodegradable	0.317902	0.822583	0.5016	0.960757	0.750298	-0.875242	0.804933
imidazolium	C40_A54	0.04	237.46	162.16	11.879	8.4	0.059	0.311	9.167	0.345	24.155	1.933	0.153	0.253	0.4	0.091	1.048	1	1	0.008	2.792	65.7009	13.2731	0.0739278	20.952	not readily biodegradable	0.0321961	0.78105	0.506531	0.960757	0.749442	-0.922939	0.896232
imidazolium	C30_A68	0.043	223.43	153.11	17.981	7.9	0.058	0.463	8.667	0.338	22.628	1.929	0.178	0.235	0.833	0.091	0.968	0	0	0.007	2.518	67.3701	11.8153	0.0722694	20.7423	not readily biodegradable	0.265818	0.777193	0.372239	0.926107	0.73771	-0.891019	0.934743
piperazinium	C873_A4	0.065	185.38	125.14	10.406	7.45	0.078	0.416	7.583	0.111	19.101	1.855	0.174	0.174	0.562	0.13	0.865	0	0	0.009	2	69.1233	10.1046	0.111155	20.661	not readily biodegradable	0.76501	0.809873	0.668182	0.881495	0.727869	-1.18382	1.44572
imidazolium	C57_A14	0.024	237.46	58.09	1.345	7.95	0.086	0	8.833	0.878	24.155	1.966	0.19	0.547	0.014	0	1.039	1	0	0.004	1.2517	66.1743	13.1577	0.0559867	20.612	not readily biodegradable	0.574158	0.758031	0.367603	0.956859	0.741578	-0.653363	0.715102
imidazolium	C57_A55	0.024	237.46	62.01	2.925	7.95	0.086	0	8.833	0.878	24.155	1.966	0.19	0.547	0.013	0	1.039	0	0	0.004	1.214	66.186	13.16	0.0559965	20.598	not readily biodegradable	0.587423	0.758031	0.337403	0.956859	0.741292	-0.179248	0.962092
imidazolium	C21_A68	0.04	237.46	153.11	17.981	8.4	0.066	0.463	9.167	0.081	24.155	1.933	0.164	0.185	0.833	0.091	1.049	0	0	0.012	2.518	65.8837	13.3336	0.208924	20.5738	not readily biodegradable	0.128604	0.864688	0.600878	0.96119	0.742427	-1.03786	0.811862
piperazinium	C866_A61	0.027	171.35	224.29	25.854	6.2	0.085	0.438	6.333	0.309	17.574	1.953	0.179	0.193	1.061	0.077	0.668	0	3	0.008	4.486	72.0079	7.43048	0.0403319	20.5213	not readily biodegradable	0.0275132	0.724736	0.256714	0.796169	0.712129	-1.50176	1.68012
piperazinium	C873_A28	0.065	185.38	171.21	14.741	7.45	0.078	0.297	7.583	0.111	19.101	1.855	0.174	0.174	0.547	0.09	0.865	0	0	0.009	3.092	69.3374	10.1359	0.0680507	20.4587	not readily biodegradable	0.380785	0.770014	0.585322	0.881495	0.723588	-1.44846	1.45384
pyridinium	C219_A61	0.029	164.3	224.29	25.854	6.2	0.042	0.438	7	0.146	16.499	1.861	0.206	0.169	1.061	0.077	0.472	0	3	0.008	4.486	74.2058	5.41484	0.00344451	20.3759	not readily biodegradable	0.124111	0.523699	0.33506	0.711276	0.699939	-0.162834	1.53044
piperazinium	C864_A61	0.031	143.29	224.29	25.854	5.2	0.084	0.438	5.333	0.072	14.521	1.943	0.19	0.209	1.061	0.077	0.288	0	3	0.008	4.486	75.6693	3.98834	0.0115621	20.3308	not readily biodegradable	0.301851	0.619875	0.370628	0.63158	0.692845	-1.3187	1.96562
imidazolium	C31_A62	0.04	237.46	121.12	10.465	8.4	0.061	0	9.167	0.401	24.155	1.933	0.164	0.307	0.308	0.085	1.038	0	0	0.006	2.513	66.6331	13.2255	0.0231638	20.1182	not readily biodegradable	0.130364	0.686233	0.464598	0.956426	0.73121	-0.962983	0.752222
piperidinium	C282_A68	0.035	212.45	153.11	17.981	8.25	0.096	0.463	8.25	0.171	22.66	1.91	0.176	0.197	0.833	0.091	1.038	0	0	0.009	2.518	65.8648	13.073	0.985382	20.0768	not readily biodegradable	0.262943	0.989919	0.494552	0.956426	0.734378	-1.72926	1.14094
piperazinium	C868_A51	0.023	199.41	171.29	27.671	7.2	0.09	0.083	7.333	0.46	20.628	1.959	0.22	0.194	1.799	0.055	0.873	0	0	0.005	3.602	69.5963	10.3186	0.0412961	20.0438	not readily biodegradable	0.0641248	0.729393	0.0863375	0.88496	0.715593	-1.67889	1.25821
imidazolium	C57_A33	0.024	237.46	45.02	2.927	7.95	0.086	0	8.833	0.878	24.155	1.966	0.19	0.547	-0.03	0	1.039	0	0	0.004	1.42	66.6836	13.259	0.0564176	20.001	not readily biodegradable	0.514941	0.758031	0.337365	0.956859	0.72902	-0.450057	0.776391
piperazinium	C873_A71	0.065	185.38	164.2	20.105	7.45	0.078	0.587	7.583	0.111	19.101	1.855	0.174	0.174	0.516	0.112	0.865	0	2	0.009	3.451	69.6036	10.1748	0.22755	19.9941	not readily biodegradable	0.254469	0.867148	0.482793	0.881495	0.714741	-1.48686	1.41359
imidazolium	C20_A65	0.043	223.43	124.16	12.137	7.9	0.063	0.435	8.667	0.457	22.628	1.929	0.195	0.402	0.403	0.12	0.972	0	1	0.006	1.98	67.9428	12.0003	0.0866841	19.9702	not readily biodegradable	0.455116	0.791191	0.405722	0.92784	0.722316	-0.728402	0.927814
imidazolium	C20_A54	0.043	223.43	162.16	11.879	7.9	0.063	0.311	8.667	0.457	22.628	1.929	0.195	0.402	0.4	0.091	0.972	1	1	0.006	2.792	68.0016	12.0107	0.0518642	19.9358	not readily biodegradable	0.16941	0.749658	0.410654	0.92784	0.721459	-0.776099	1.01911
imidazolium	C31_A27	0.04	237.46	59.05	6.313	8.4	0.061	0.027	9.167	0.401	24.155	1.933	0.164	0.307	0.292	0	1.038	0	0	0.006	2.801	66.8151	13.2616	0.0259806	19.8973	not readily biodegradable	0.0290294	0.695276	0.54396	0.956426	0.726643	-0.679749	0.704921
imidazolium	C31_A49	0.04	237.46	95.11	7.497	8.4	0.061	0.538	9.167	0.401	24.155	1.933	0.164	0.307	0.291	0	1.038	0	0	0.006	1.258	66.6994	13.2387	0.216132	19.8457	not readily biodegradable	0.571941	0.866433	0.521329	0.956426	0.726358	-0.688759	0.809537
imidazolium	C31_A53	0.04	237.46	111.11	8.56	8.4	0.061	0.455	9.167	0.401	24.155	1.933	0.164	0.307	0.286	0.163	1.038	0	0	0.006	1.673	66.7985	13.2583	0.15339	19.7897	not readily biodegradable	0.425922	0.838633	0.50101	0.956426	0.724931	-0.676709	0.863915
piperazinium	C869_A28	0.091	129.26	171.21	14.741	5.45	0.079	0.297	5.583	0	12.994	1.793	0.219	0.242	0.547	0.09	0.298	0	0	0.005	3.092	76.1714	4.08641	0.00661927	19.7356	not readily biodegradable	0.929551	0.574318	0.554585	0.635912	0.681059	-1.08257	2.02479
imidazolium	C40_A62	0.04	237.46	121.12	10.465	8.4	0.059	0	9.167	0.345	24.155	1.933	0.153	0.253	0.308	0.085	1.048	0	0	0.008	2.513	66.7988	13.4949	0.0206815	19.6856	not readily biodegradable	0.130364	0.676882	0.533559	0.960757	0.723184	-0.962983	0.752222
imidazolium	C40_A27	0.04	237.46	59.05	6.313	8.4	0.059	0.027	9.167	0.345	24.155	1.933	0.153	0.253	0.292	0	1.048	0	0	0.008	2.801	66.9782	13.5311	0.0231954	19.4675	not readily biodegradable	0.0290294	0.685926	0.612921	0.960757	0.718618	-0.679749	0.704921
imidazolium	C40_A49	0.04	237.46	95.11	7.497	8.4	0.059	0.538	9.167	0.345	24.155	1.933	0.153	0.253	0.291	0	1.048	0	0	0.008	1.258	66.8757	13.5104	0.193	19.4209	not readily biodegradable	0.571941	0.857082	0.59029	0.960757	0.718332	-0.688759	0.809537
pyrrolidinium	C134_A68	0.035	212.45	153.11	17.981	8.25	0.092	0.463	8.25	0.096	22.66	1.91	0.176	0.186	0.833	0.091	1.061	0	0	0.01	2.518	66.132	13.6708	0.784786	19.4124	not readily biodegradable	0.262943	0.971218	0.551624	0.966388	0.721879	-1.72926	1.14094
piperazinium	C874_A4	0.06	199.41	125.14	10.406	7.95	0.08	0.416	8.083	0.155	20.628	1.865	0.2	0.277	0.562	0.13	0.872	0	0	0.01	2	70.003	10.3606	0.235086	19.4013	not readily biodegradable	0.627796	0.869316	0.668055	0.884527	0.702978	-1.29379	1.30959
imidazolium	C40_A53	0.04	237.46	111.11	8.56	8.4	0.059	0.455	9.167	0.345	24.155	1.933	0.153	0.253	0.286	0.163	1.048	0	0	0.008	1.673	66.9695	13.5294	0.136962	19.3642	not readily biodegradable	0.425922	0.829282	0.569972	0.960757	0.716905	-0.676709	0.863915
piperazinium	C869_A71	0.091	129.26	164.2	20.105	5.45	0.079	0.587	5.583	0	12.994	1.793	0.219	0.242	0.516	0.112	0.298	0	2	0.005	3.451	76.5685	4.10772	0.022164	19.3016	not readily biodegradable	0.803235	0.671452	0.452056	0.635912	0.672211	-1.12097	1.98454
piperazinium	C872_A68	0.07	171.35	153.11	17.981	6.95	0.081	0.463	7.083	0.074	17.574	1.843	0.208	0.208	0.833	0.091	0.859	0	0	0.009	2.518	70.4777	10.1938	0.0881065	19.2403	not readily biodegradable	0.719963	0.789548	0.541176	0.878896	0.698045	-1.30262	1.56355
imidazolium	C31_A63	0.04	237.46	87.06	8.284	8.4	0.061	0.482	9.167	0.401	24.155	1.933	0.164	0.307	0.245	0.152	1.038	0	0	0.006	1.495	67.2498	13.3479	0.172733	19.2295	not readily biodegradable	0.488552	0.847676	0.506286	0.956426	0.713229	-0.712318	0.773502
piperazinium	C865_A68	0.029	157.32	153.11	17.981	5.7	0.081	0.463	5.833	0.213	16.047	1.948	0.184	0.235	0.833	0.091	0.525	0	0	0.01	2.518	74.7702	5.99197	0.0198123	19.218	not readily biodegradable	0.857177	0.664316	0.495387	0.734232	0.678471	-1.21731	1.70849
imidazolium	C31_A64	0.04	237.46	132.08	11.425	8.4	0.061	0.344	9.167	0.401	24.155	1.933	0.164	0.307	0.243	0.131	1.038	0	0	0.006	2.425	67.323	13.3624	0.0975375	19.217	not readily biodegradable	0.161327	0.801454	0.446248	0.956426	0.712658	-0.801799	0.865314
piperazinium	C874_A28	0.06	199.41	171.21	14.741	7.95	0.08	0.297	8.083	0.155	20.628	1.865	0.2	0.277	0.547	0.09	0.872	0	0	0.01	3.092	70.2447	10.3964	0.143974	19.215	not readily biodegradable	0.243571	0.829458	0.585195	0.884527	0.698697	-1.55843	1.31771
imidazolium	C435_A4	0.04	237.46	125.14	10.406	8.4	0.056	0.416	9.167	0.336	24.155	1.933	0.164	0.225	0.562	0.13	1.049	0	0	0.01	2	67.2293	13.6059	0.0982982	19.0666	not readily biodegradable	0.310865	0.802193	0.581057	0.96119	0.710531	-0.821538	0.834531
imidazolium	C41_A69	0.038	251.49	180.15	8.406	8.9	0.062	0.529	9.667	0.41	25.681	1.937	0.171	0.393	0.052	0.125	1.107	0	0	0.008	2.21	65.86	14.768	0.405184	18.9668	not readily biodegradable	0.0998514	0.918187	0.541673	0.986312	0.715577	-0.631109	0.998548
piperazinium	C871_A28	0.076	157.32	171.21	14.741	6.45	0.075	0.297	6.583	0.01	16.047	1.829	0.2	0.208	0.547	0.09	0.676	0	0	0.012	3.092	73.4705	7.68939	0.0175194	18.8226	not readily biodegradable	0.655213	0.655803	0.696935	0.799634	0.677421	-1.26563	1.73928
imidazolium	C40_A63	0.04	237.46	87.06	8.284	8.4	0.059	0.482	9.167	0.345	24.155	1.933	0.153	0.253	0.245	0.152	1.048	0	0	0.008	1.495	67.415	13.6194	0.154218	18.8114	not readily biodegradable	0.488552	0.838325	0.575247	0.960757	0.705204	-0.712318	0.773502
imidazolium	C40_A64	0.04	237.46	132.08	11.425	8.4	0.059	0.344	9.167	0.345	24.155	1.933	0.153	0.253	0.243	0.131	1.048	0	0	0.008	2.425	67.4825	13.633	0.0870749	18.7974	not readily biodegradable	0.161327	0.792103	0.515209	0.960757	0.704633	-0.801799	0.865314
piperazinium	C874_A71	0.06	199.41	164.2	20.105	7.95	0.08	0.587	8.083	0.155	20.628	1.865	0.2	0.277	0.516	0.112	0.872	0	2	0.01	3.451	70.3707	10.415	0.480445	18.7338	not readily biodegradable	0.117255	0.926592	0.482667	0.884527	0.689849	-1.59682	1.27746
imidazolium	C31_A57	0.04	237.46	96.07	4.388	8.4	0.061	0.517	9.167	0.401	24.155	1.933	0.164	0.307	0.208	0	1.038	0	0	0.006	1.303	67.6434	13.426	0.2009	18.7296	not readily biodegradable	0.556108	0.859399	0.580755	0.956426	0.702669	-0.297905	1.00628
pyridinium	C210_A59	0.027	178.33	206.32	27.302	6.283	0.045	0.438	7.167	0.11	18.026	1.913	0.241	0.231	1.59	0.059	0.552	0	3	0.011	4.118	74.9727	6.30195	0.00458974	18.7208	not readily biodegradable	0.11638	0.546041	0.387753	0.745926	0.669162	-0.346432	1.35132
imidazolium	C9_A68	0.043	223.43	153.11	17.981	7.9	0.071	0.463	8.667	0.577	22.628	1.929	0.19	0.25	0.833	0.091	0.976	0	0	0.005	2.518	68.8741	12.2511	0.156867	18.7179	not readily biodegradable	0.265818	0.837972	0.215318	0.929572	0.696573	-0.891019	0.934743
piperazinium	C863_A60	0.034	129.26	212.28	25.293	4.7	0.085	0.389	4.833	0	12.994	1.937	0.208	0.219	1.154	0.06	0.002	0	3	0.006	4.018	78.7872	2.5046	0.00559662	18.7026	not readily biodegradable	0.603733	0.558045	0.373914	0.507706	0.653001	-1.19584	2.09286
imidazolium	C20_A62	0.043	223.43	121.12	10.465	7.9	0.063	0	8.667	0.457	22.628	1.929	0.195	0.402	0.308	0.085	0.972	0	0	0.006	2.513	69.0864	12.2023	0.0144984	18.6968	not readily biodegradable	0.267578	0.645491	0.437681	0.92784	0.695202	-0.816144	0.875104
piperazinium	C870_A28	0.082	143.29	171.21	14.741	5.95	0.072	0.297	6.083	0	14.521	1.813	0.209	0.209	0.547	0.09	0.391	0	0	0.007	3.092	76.5559	4.841	0.00824947	18.5948	not readily biodegradable	0.792337	0.591684	0.596629	0.676193	0.660311	-1.16788	1.87985
imidazolium	C41_A55	0.038	251.49	62.01	2.925	8.9	0.062	0	9.667	0.41	25.681	1.937	0.171	0.393	0.013	0	1.107	0	0	0.008	1.214	66.5197	14.916	0.0455747	18.5187	not readily biodegradable	0.450299	0.741001	0.646438	0.986312	0.704446	-0.275519	0.817513
imidazolium	C20_A27	0.043	223.43	59.05	6.313	7.9	0.063	0.027	8.667	0.457	22.628	1.929	0.195	0.402	0.292	0	0.972	0	0	0.006	2.801	69.2656	12.2339	0.0162591	18.4842	not readily biodegradable	0.166243	0.654534	0.517043	0.92784	0.690635	-0.53291	0.827802
piperazinium	C873_A65	0.065	185.38	124.16	12.137	7.45	0.078	0.435	7.583	0.111	19.101	1.855	0.174	0.174	0.403	0.12	0.865	0	1	0.009	1.98	71.0144	10.381	0.123563	18.481	not readily biodegradable	0.772047	0.816237	0.635095	0.881495	0.68249	-1.23753	1.41612
piperazinium	C873_A54	0.065	185.38	162.16	11.879	7.45	0.078	0.311	7.583	0.111	19.101	1.855	0.174	0.174	0.4	0.091	0.865	1	1	0.009	2.792	71.0845	10.3913	0.0739381	18.4503	not readily biodegradable	0.486341	0.774704	0.640027	0.881495	0.681633	-1.28522	1.50742
imidazolium	C20_A49	0.043	223.43	95.11	7.497	7.9	0.063	0.538	8.667	0.457	22.628	1.929	0.195	0.402	0.291	0	0.972	0	0	0.006	1.258	69.1943	12.2213	0.135354	18.449	not readily biodegradable	0.709155	0.825691	0.494412	0.92784	0.69035	-0.54192	0.932419
piperazinium	C871_A71	0.076	157.32	164.2	20.105	6.45	0.075	0.587	6.583	0.01	16.047	1.829	0.2	0.208	0.516	0.112	0.676	0	2	0.012	3.451	73.8172	7.72568	0.0586332	18.3985	not readily biodegradable	0.528897	0.752937	0.594406	0.799634	0.668573	-1.30403	1.69904
imidazolium	C20_A53	0.043	223.43	111.11	8.56	7.9	0.063	0.455	8.667	0.457	22.628	1.929	0.195	0.402	0.286	0.163	0.972	0	0	0.006	1.673	69.2776	12.236	0.0960349	18.3903	not readily biodegradable	0.563136	0.79789	0.474094	0.92784	0.688923	-0.529869	0.986797
imidazolium	C40_A57	0.04	237.46	96.07	4.388	8.4	0.059	0.517	9.167	0.345	24.155	1.933	0.153	0.253	0.208	0	1.048	0	0	0.008	1.303	67.8042	13.698	0.179351	18.3184	not readily biodegradable	0.556108	0.850049	0.649716	0.960757	0.694644	-0.297905	1.00628
pyrrolidinium	C181_A4	0.035	212.45	125.14	10.406	8.25	0.097	0.416	8.25	0.128	22.66	1.91	0.176	0.221	0.562	0.13	0.928	0	0	0.008	2	69.5337	11.3621	0.906996	18.1972	not readily biodegradable	0.445204	0.978852	0.638988	0.908782	0.684303	-1.51294	1.16361
piperazinium	C870_A71	0.082	143.29	164.2	20.105	5.95	0.072	0.587	6.083	0	14.521	1.813	0.209	0.209	0.516	0.112	0.391	0	2	0.007	3.451	76.9333	4.86486	0.0276148	18.1742	not readily biodegradable	0.666021	0.688818	0.494101	0.676193	0.651463	-1.20627	1.8396
imidazolium	C57_A66	0.024	237.46	135.11	14.945	7.95	0.086	0.139	8.833	0.878	24.155	1.966	0.19	0.547	-0.172	0.133	1.039	0	0	0.004	2.622	68.2386	13.5681	0.102779	18.0905	not readily biodegradable	0.0920114	0.804588	0.10765	0.956859	0.688492	-0.883753	0.833836
pyrrolidinium	C181_A28	0.035	212.45	171.21	14.741	8.25	0.097	0.297	8.25	0.128	22.66	1.91	0.176	0.221	0.547	0.09	0.928	0	0	0.008	3.092	69.9482	11.4299	0.556863	18.0651	not readily biodegradable	0.0609782	0.938993	0.556128	0.908782	0.680022	-1.77758	1.17173
imidazolium	C20_A63	0.043	223.43	87.06	8.284	7.9	0.063	0.482	8.667	0.457	22.628	1.929	0.195	0.402	0.245	0.152	0.972	0	0	0.006	1.495	69.7249	12.315	0.108113	17.8519	not readily biodegradable	0.625766	0.806934	0.479369	0.92784	0.677221	-0.565479	0.896383
imidazolium	C20_A64	0.043	223.43	132.08	11.425	7.9	0.063	0.344	8.667	0.457	22.628	1.929	0.195	0.402	0.243	0.131	0.972	0	0	0.006	2.425	69.7798	12.3247	0.0610301	17.8344	not readily biodegradable	0.298541	0.760711	0.419331	0.92784	0.676651	-0.65496	0.988196
morpholinium	C850_A4	0.061	258.48	125.14	10.406	9.083	0.068	0.416	9.75	0.363	25.616	1.924	0.169	0.209	0.562	0.13	1.064	0	0	0.005	2	67.8048	14.0911	0.463683	17.6403	not readily biodegradable	0.179582	0.926724	0.462968	0.967687	0.682391	-1.08183	0.527003
piperazinium	C869_A16	0.091	129.26	227.01	19.701	5.45	0.079	0.606	5.583	0	12.994	1.793	0.219	0.242	0.389	0.05	0.298	0	0	0.005	5.466	78.1936	4.1949	0.0244911	17.587	not readily biodegradable	0.0942476	0.677816	0.459778	0.635912	0.635965	-1.26729	2.10198
imidazolium	C41_A7	0.038	251.49	149.08	7.722	8.9	0.062	0.609	9.667	0.41	25.681	1.937	0.171	0.393	-0.055	0	1.107	0	0	0.008	2.254	66.8849	14.9978	0.573481	17.5438	not readily biodegradable	0.0843698	0.944982	0.554747	0.986312	0.685039	-0.488211	0.975426
piperazinium	C875_A68	0.057	213.44	153.11	17.981	8.45	0.082	0.463	8.583	0.243	22.155	1.873	0.199	0.188	0.833	0.091	0.97	0	0	0.008	2.518	69.6411	12.2568	0.593574	17.5085	not readily biodegradable	0.308321	0.944502	0.438923	0.926973	0.671352	-1.56928	1.12915
piperazinium	C862_A60	0.037	115.23	212.28	25.293	4.2	0.086	0.389	4.333	0	11.467	1.929	0.207	0.181	1.154	0.06	0.002	0	3	0.005	4.018	79.9583	2.54182	0.00323584	17.4966	not readily biodegradable	0.740947	0.512628	0.352891	0.507706	0.627367	-1.07218	2.22053
imidazolium	C31_A70	0.04	237.46	120.17	11.655	8.4	0.061	0.092	9.167	0.401	24.155	1.933	0.164	0.307	0.109	0.13	1.038	0	2	0.006	1.852	68.8323	13.662	0.0350507	17.4706	not readily biodegradable	0.36294	0.717048	0.441852	0.956426	0.674414	-0.922483	0.769434
piperazinium	C863_A61	0.034	129.26	224.29	25.854	4.7	0.085	0.438	4.833	0	12.994	1.937	0.208	0.219	1.061	0.077	0.002	0	3	0.006	4.486	79.9961	2.54302	0.00696365	17.454	not readily biodegradable	0.439065	0.574457	0.363191	0.507706	0.626458	-1.23339	2.11057
piperazinium	C866_A68	0.027	171.35	153.11	17.981	6.2	0.085	0.463	6.333	0.309	17.574	1.953	0.179	0.193	0.833	0.091	0.668	0	0	0.008	2.518	74.8065	7.71926	0.0464791	17.4278	not readily biodegradable	0.719963	0.73311	0.4072	0.796169	0.647056	-1.30262	1.56355
imidazolium	C20_A57	0.043	223.43	96.07	4.388	7.9	0.063	0.517	8.667	0.457	22.628	1.929	0.195	0.402	0.208	0	0.972	0	0	0.006	1.303	70.1174	12.3844	0.125715	17.3725	not readily biodegradable	0.693322	0.818657	0.553838	0.92784	0.666661	-0.151066	1.12916
piperazinium	C874_A65	0.06	199.41	124.16	12.137	7.95	0.08	0.435	8.083	0.155	20.628	1.865	0.2	0.277	0.403	0.12	0.872	0	1	0.01	1.98	71.8148	10.6287	0.260952	17.2955	not readily biodegradable	0.634833	0.87568	0.634969	0.884527	0.657598	-1.34749	1.27999
pyridinium	C219_A68	0.029	164.3	153.11	17.981	6.2	0.042	0.463	7	0.146	16.499	1.861	0.206	0.169	0.833	0.091	0.472	0	0	0.008	2.518	77.092	5.62544	0.00396961	17.2786	not readily biodegradable	0.816561	0.532073	0.485546	0.711276	0.634866	0.0363006	1.41388
piperazinium	C874_A54	0.06	199.41	162.16	11.879	7.95	0.08	0.311	8.083	0.155	20.628	1.865	0.2	0.277	0.4	0.091	0.872	1	1	0.01	2.792	71.9237	10.6448	0.156232	17.2753	not readily biodegradable	0.349127	0.834147	0.6399	0.884527	0.656742	-1.39519	1.37129
piperazinium	C873_A62	0.065	185.38	121.12	10.465	7.45	0.078	0	7.583	0.111	19.101	1.855	0.174	0.174	0.308	0.085	0.865	0	0	0.009	2.513	72.1694	10.5499	0.020655	17.2601	not readily biodegradable	0.584509	0.670536	0.667054	0.881495	0.655376	-1.32527	1.36341
piperazinium	C864_A68	0.031	143.29	153.11	17.981	5.2	0.084	0.463	5.333	0.072	14.521	1.943	0.19	0.209	0.833	0.091	0.288	0	0	0.008	2.518	78.6174	4.14373	0.0133255	17.2255	not readily biodegradable	0.994302	0.628249	0.521115	0.63158	0.627772	-1.11956	1.84906
pyrrolidinium	C479_A54	0.033	226.48	162.16	11.879	8.75	0.094	0.311	8.75	0.304	24.187	1.915	0.162	0.202	0.4	0.091	1.096	1	1	0.012	2.792	67.1815	14.7742	0.886117	17.1581	not readily biodegradable	0.0293206	0.97975	0.610328	0.981547	0.676421	-1.69816	1.07635
imidazolium	C30_A4	0.043	223.43	125.14	10.406	7.9	0.058	0.416	8.667	0.338	22.628	1.929	0.178	0.235	0.562	0.13	0.968	0	0	0.007	2	70.4625	12.3576	0.0621944	17.1177	not readily biodegradable	0.448079	0.761451	0.517029	0.926107	0.660364	-0.674699	0.957412
imidazolium	C40_A70	0.04	237.46	120.17	11.655	8.4	0.059	0.092	9.167	0.345	24.155	1.933	0.153	0.253	0.109	0.13	1.048	0	2	0.008	1.852	68.9642	13.9323	0.0312768	17.0722	not readily biodegradable	0.36294	0.707697	0.510813	0.960757	0.666388	-0.922483	0.769434
piperazinium	C873_A27	0.065	185.38	59.05	6.313	7.45	0.078	0.027	7.583	0.111	19.101	1.855	0.174	0.174	0.292	0	0.865	0	0	0.009	2.801	72.3458	10.5756	0.02316	17.0554	not readily biodegradable	0.483175	0.67958	0.746416	0.881495	0.65081	-1.04203	1.3161
piperazinium	C379_A60	0.034	144.28	212.28	25.293	4.833	0.068	0.389	5.75	0	14.015	1.866	0.233	0.202	1.154	0.06	0.348	0	3	0.004	4.018	78.376	4.59329	0.00245324	17.0282	not readily biodegradable	0.511988	0.49189	0.331869	0.657568	0.625139	-1.03053	1.89321
imidazolium	C435_A65	0.04	237.46	124.16	12.137	8.4	0.056	0.435	9.167	0.336	24.155	1.933	0.164	0.225	0.403	0.12	1.049	0	1	0.01	1.98	68.9389	13.9519	0.109066	17.0002	not readily biodegradable	0.317902	0.808557	0.547971	0.96119	0.665152	-0.875242	0.804933
imidazolium	C21_A4	0.04	237.46	125.14	10.406	8.4	0.066	0.416	9.167	0.081	24.155	1.933	0.164	0.185	0.562	0.13	1.049	0	0	0.012	2	68.8926	13.9425	0.179759	16.9851	not readily biodegradable	0.310865	0.848946	0.745669	0.96119	0.665082	-0.821538	0.834531
imidazolium	C435_A54	0.04	237.46	162.16	11.879	8.4	0.056	0.311	9.167	0.336	24.155	1.933	0.164	0.225	0.4	0.091	1.049	1	1	0.01	2.792	69.0005	13.9643	0.0652573	16.9699	not readily biodegradable	0.0321961	0.767024	0.552902	0.96119	0.664295	-0.922939	0.896232
piperazinium	C873_A53	0.065	185.38	111.11	8.56	7.45	0.078	0.455	7.583	0.111	19.101	1.855	0.174	0.174	0.286	0.163	0.865	0	0	0.009	1.673	72.3301	10.5733	0.136742	16.9598	not readily biodegradable	0.880067	0.822936	0.703467	0.881495	0.649097	-1.03899	1.4751
imidazolium	C30_A28	0.043	223.43	171.21	14.741	7.9	0.058	0.297	8.667	0.338	22.628	1.929	0.178	0.235	0.547	0.09	0.968	0	0	0.007	3.092	70.6409	12.3889	0.038055	16.9321	not readily biodegradable	0.0638536	0.721593	0.434169	0.926107	0.656083	-0.939339	0.965534
imidazolium	C31_A56	0.04	237.46	90.07	5.196	8.4	0.061	0	9.167	0.401	24.155	1.933	0.164	0.307	0.064	0.116	1.038	0	3	0.006	2.146	69.3153	13.7579	0.0240962	16.9027	not readily biodegradable	0.259494	0.686233	0.56531	0.956426	0.661571	-0.770641	0.753683
piperazinium	C871_A54	0.076	157.32	162.16	11.879	6.45	0.075	0.311	6.583	0.01	16.047	1.829	0.2	0.208	0.4	0.091	0.676	1	1	0.012	2.792	75.2179	7.87227	0.0190088	16.8908	not readily biodegradable	0.760769	0.660492	0.75164	0.799634	0.635466	-1.10239	1.79286
imidazolium	C39_A68	0.043	223.43	153.11	17.981	7.9	0.056	0.463	8.667	0.309	22.628	1.929	0.19	0.214	0.833	0.091	0.977	0	0	0.008	2.518	70.4956	12.5617	0.0673509	16.8753	not readily biodegradable	0.265818	0.767843	0.4072	0.930005	0.655669	-0.891019	0.934743
imidazolium	C31_A67	0.04	237.46	197.65	2.652	8.4	0.061	0	9.167	0.401	24.155	1.933	0.164	0.307	0.057	0	1.038	0	0	0.006	0.863	69.3885	13.7724	0.0241217	16.815	not readily biodegradable	0.710924	0.686233	0.613937	0.956426	0.659573	-0.843059	1.04321
pyrrolidinium	C171_A57	0.038	198.42	96.07	4.388	7.75	0.099	0.517	7.75	0.103	21.133	1.903	0.156	0.18	0.208	0	0.811	0	0	0.009	1.303	72.6677	9.65546	0.87008	16.8068	not readily biodegradable	0.82766	0.971939	0.787056	0.858106	0.644757	-0.930139	1.49312
imidazolium	C31_A69	0.04	237.46	180.15	8.406	8.4	0.061	0.529	9.167	0.401	24.155	1.933	0.164	0.307	0.052	0.125	1.038	0	0	0.006	2.21	69.3071	13.7563	0.21635	16.7203	not readily biodegradable	0.236976	0.863418	0.503954	0.956426	0.658146	-0.534838	1.14313
piperidinium	C291_A68	0.035	212.45	153.11	17.981	8.25	0.094	0.463	8.25	0.144	22.66	1.91	0.186	0.176	0.833	0.091	1.061	0	0	0.01	2.518	68.2943	14.1178	0.909976	16.6779	not readily biodegradable	0.262943	0.980568	0.528552	0.966388	0.662034	-1.72926	1.14094
piperazinium	C870_A54	0.082	143.29	162.16	11.879	5.95	0.072	0.311	6.083	0	14.521	1.813	0.209	0.209	0.4	0.091	0.391	1	1	0.007	2.792	78.3748	4.95601	0.00895059	16.6602	not readily biodegradable	0.897893	0.596373	0.651334	0.676193	0.618356	-1.00464	1.93343
piperidinium	C282_A4	0.035	212.45	125.14	10.406	8.25	0.096	0.416	8.25	0.171	22.66	1.91	0.176	0.197	0.562	0.13	1.038	0	0	0.009	2	68.9084	13.6771	0.848261	16.5662	not readily biodegradable	0.445204	0.974177	0.639343	0.956426	0.657033	-1.51294	1.16361
imidazolium	C40_A56	0.04	237.46	90.07	5.196	8.4	0.059	0	9.167	0.345	24.155	1.933	0.153	0.253	0.064	0.116	1.048	0	3	0.008	2.146	69.4387	14.0282	0.0214989	16.5116	not readily biodegradable	0.259494	0.676882	0.634272	0.960757	0.653545	-0.770641	0.753683
imidazolium	C66_A68	0.04	237.46	153.11	17.981	8.4	0.057	0.463	9.167	0.304	24.155	1.933	0.185	0.195	0.833	0.091	1.038	0	0	0.01	2.518	69.5904	13.8125	0.131034	16.4661	not readily biodegradable	0.128604	0.822611	0.451648	0.956426	0.651975	-1.03786	0.811862
piperazinium	C873_A63	0.065	185.38	87.06	8.284	7.45	0.078	0.482	7.583	0.111	19.101	1.855	0.174	0.174	0.245	0.152	0.865	0	0	0.009	1.495	72.7676	10.6373	0.153877	16.4413	not readily biodegradable	0.942697	0.831979	0.708742	0.881495	0.637395	-1.0746	1.38469
piperidinium	C282_A28	0.035	212.45	171.21	14.741	8.25	0.096	0.297	8.25	0.171	22.66	1.91	0.176	0.197	0.547	0.09	1.038	0	0	0.009	3.092	69.2909	13.753	0.52059	16.4354	not readily biodegradable	0.0609782	0.934318	0.556483	0.956426	0.652752	-1.77758	1.17173
piperazinium	C873_A64	0.065	185.38	132.08	11.425	7.45	0.078	0.344	7.583	0.111	19.101	1.855	0.174	0.174	0.243	0.131	0.865	0	0	0.009	2.425	72.8381	10.6476	0.0868797	16.4274	not readily biodegradable	0.615472	0.785757	0.648704	0.881495	0.636825	-1.16408	1.4765
imidazolium	C40_A67	0.04	237.46	197.65	2.652	8.4	0.059	0	9.167	0.345	24.155	1.933	0.153	0.253	0.057	0	1.048	0	0	0.008	0.863	69.5106	14.0427	0.0215211	16.4251	not readily biodegradable	0.710924	0.676882	0.682898	0.960757	0.651547	-0.843059	1.04321
imidazolium	C40_A69	0.04	237.46	180.15	8.406	8.4	0.059	0.529	9.167	0.345	24.155	1.933	0.153	0.253	0.052	0.125	1.048	0	0	0.008	2.21	69.4426	14.029	0.193063	16.3354	not readily biodegradable	0.236976	0.854068	0.572915	0.960757	0.65012	-0.534838	1.14313
piperazinium	C869_A15	0.091	129.26	95.11	7.497	5.45	0.079	0.538	5.583	0	12.994	1.793	0.219	0.242	0.291	0	0.298	0	0	0.005	4.4469	79.4005	4.25965	0.0187553	16.3211	not readily biodegradable	0.452823	0.65504	0.693048	0.635912	0.607995	-0.685155	1.99167
piperazinium	C862_A61	0.037	115.23	224.29	25.854	4.2	0.086	0.438	4.333	0	11.467	1.929	0.207	0.181	1.061	0.077	0.002	0	3	0.005	4.486	81.1267	2.57896	0.00402332	16.2904	not readily biodegradable	0.576279	0.52904	0.342168	0.507706	0.600824	-1.10973	2.23824
imidazolium	C31_A14	0.04	237.46	58.09	1.345	8.4	0.061	0	9.167	0.401	24.155	1.933	0.164	0.307	0.014	0	1.038	1	0	0.006	1.2517	69.8333	13.8607	0.0242763	16.2817	not readily biodegradable	0.574158	0.686233	0.638919	0.956426	0.6473	-0.653363	0.715102
imidazolium	C31_A55	0.04	237.46	62.01	2.925	8.4	0.061	0	9.167	0.401	24.155	1.933	0.164	0.307	0.013	0	1.038	0	0	0.006	1.214	69.8436	13.8627	0.0242799	16.2694	not readily biodegradable	0.587423	0.686233	0.608719	0.956426	0.647015	-0.179248	0.962092
pyrrolidinium	C181_A54	0.035	212.45	162.16	11.879	8.25	0.097	0.311	8.25	0.128	22.66	1.91	0.176	0.221	0.4	0.091	0.928	1	1	0.008	2.792	71.5171	11.6862	0.603406	16.1933	not readily biodegradable	0.166535	0.943683	0.610833	0.908782	0.638067	-1.61434	1.22531
pyrrolidinium	C181_A65	0.035	212.45	124.16	12.137	8.25	0.097	0.435	8.25	0.128	22.66	1.91	0.176	0.221	0.403	0.12	0.928	0	1	0.008	1.98	71.1966	11.6339	1.00486	16.1647	not readily biodegradable	0.452241	0.985216	0.605902	0.908782	0.638923	-1.56664	1.13401
imidazolium	C20_A70	0.043	223.43	120.17	11.655	7.9	0.063	0.092	8.667	0.457	22.628	1.929	0.195	0.402	0.109	0.13	0.972	0	2	0.006	1.852	71.2453	12.5836	0.0219011	16.1492	not readily biodegradable	0.500154	0.676305	0.414935	0.92784	0.638406	-0.775644	0.892316
piperazinium	C874_A62	0.06	199.41	121.12	10.465	7.95	0.08	0	8.083	0.155	20.628	1.865	0.2	0.277	0.308	0.085	0.872	0	0	0.01	2.513	73.0132	10.8061	0.0436394	16.1371	not readily biodegradable	0.447295	0.72998	0.666928	0.884527	0.630485	-1.43523	1.22728
pyrrolidinium	C479_A62	0.033	226.48	121.12	10.465	8.75	0.094	0	8.75	0.304	24.187	1.915	0.162	0.202	0.308	0.085	1.096	0	0	0.012	2.513	68.5489	15.0749	0.248783	16.1274	not readily biodegradable	0.127488	0.875582	0.637355	0.981547	0.650163	-1.73821	0.932345
pyrrolidinium	C134_A4	0.035	212.45	125.14	10.406	8.25	0.092	0.416	8.25	0.096	22.66	1.91	0.176	0.186	0.562	0.13	1.061	0	0	0.01	2	69.0797	14.2801	0.674521	15.9657	not readily biodegradable	0.445204	0.955475	0.696414	0.966388	0.644534	-1.51294	1.16361
piperazinium	C874_A27	0.06	199.41	59.05	6.313	7.95	0.08	0.027	8.083	0.155	20.628	1.865	0.2	0.277	0.292	0	0.872	0	0	0.01	2.801	73.1808	10.8309	0.0489247	15.9393	not readily biodegradable	0.345961	0.739023	0.74629	0.884527	0.625918	-1.152	1.17998
pyrrolidinium	C479_A27	0.033	226.48	59.05	6.313	8.75	0.094	0.027	8.75	0.304	24.187	1.915	0.162	0.202	0.292	0	1.096	0	0	0.012	2.801	68.6873	15.1054	0.278837	15.9285	not readily biodegradable	0.0261539	0.884626	0.716717	0.981547	0.645597	-1.45498	0.885044
imidazolium	C40_A14	0.04	237.46	58.09	1.345	8.4	0.059	0	9.167	0.345	24.155	1.933	0.153	0.253	0.014	0	1.048	1	0	0.008	1.2517	69.9482	14.1311	0.0216566	15.899	not readily biodegradable	0.574158	0.676882	0.707881	0.960757	0.639275	-0.653363	0.715102
imidazolium	C40_A55	0.04	237.46	62.01	2.925	8.4	0.059	0	9.167	0.345	24.155	1.933	0.153	0.253	0.013	0	1.048	0	0	0.008	1.214	69.9583	14.1332	0.0216597	15.8869	not readily biodegradable	0.587423	0.676882	0.67768	0.960757	0.638989	-0.179248	0.962092
piperazinium	C874_A49	0.06	199.41	95.11	7.497	7.95	0.08	0.538	8.083	0.155	20.628	1.865	0.2	0.277	0.291	0	0.872	0	0	0.01	1.258	72.9298	10.7938	0.406311	15.8701	not readily biodegradable	0.888872	0.91018	0.723659	0.884527	0.625633	-1.16101	1.28459
piperazinium	C867_A60	0.025	185.38	212.28	25.293	6.7	0.088	0.389	6.833	0.357	19.101	1.956	0.2	0.18	1.154	0.06	0.771	0	3	0.007	4.018	74.8124	9.26176	0.0756664	15.8502	not readily biodegradable	0.0549672	0.772443	0.223343	0.840781	0.617325	-1.56173	1.5219
piperazinium	C379_A61	0.034	144.28	224.29	25.854	4.833	0.068	0.438	5.75	0	14.015	1.866	0.233	0.202	1.061	0.077	0.348	0	3	0.004	4.486	79.4921	4.6587	0.00304915	15.8461	not readily biodegradable	0.34732	0.508302	0.321146	0.657568	0.598596	-1.06808	1.91092
imidazolium	C435_A62	0.04	237.46	121.12	10.465	8.4	0.056	0	9.167	0.336	24.155	1.933	0.164	0.225	0.308	0.085	1.049	0	0	0.01	2.513	69.9768	14.1619	0.01821	15.8431	not readily biodegradable	0.130364	0.662857	0.57993	0.96119	0.638038	-0.962983	0.752222
piperazinium	C874_A53	0.06	199.41	111.11	8.56	7.95	0.08	0.455	8.083	0.155	20.628	1.865	0.2	0.277	0.286	0.163	0.872	0	0	0.01	1.673	73.0693	10.8144	0.288484	15.8278	not readily biodegradable	0.742853	0.882379	0.70334	0.884527	0.624206	-1.14896	1.33897
pyrrolidinium	C134_A28	0.035	212.45	171.21	14.741	8.25	0.092	0.297	8.25	0.096	22.66	1.91	0.176	0.186	0.547	0.09	1.061	0	0	0.01	3.092	69.4115	14.3487	0.413655	15.8261	not readily biodegradable	0.0609782	0.915617	0.613554	0.966388	0.640253	-1.77758	1.17173
piperazinium	C872_A4	0.07	171.35	125.14	10.406	6.95	0.081	0.416	7.083	0.074	17.574	1.843	0.208	0.208	0.562	0.13	0.859	0	0	0.009	2	73.5374	10.6364	0.0756433	15.7505	not readily biodegradable	0.902224	0.773806	0.685966	0.878896	0.6207	-1.0863	1.58622
imidazolium	C31_A33	0.04	237.46	45.02	2.927	8.4	0.061	0	9.167	0.401	24.155	1.933	0.164	0.307	-0.03	0	1.038	0	0	0.006	1.42	70.2804	13.9494	0.0244317	15.7457	not readily biodegradable	0.514941	0.686233	0.608681	0.956426	0.634742	-0.450057	0.776391
piperazinium	C871_A62	0.076	157.32	121.12	10.465	6.45	0.075	0	6.583	0.01	16.047	1.829	0.2	0.208	0.308	0.085	0.676	0	0	0.012	2.513	76.2721	7.9826	0.00530368	15.74	not readily biodegradable	0.858937	0.556324	0.778667	0.799634	0.609208	-1.14244	1.64885
morpholinium	C850_A65	0.061	258.48	124.16	12.137	9.083	0.068	0.435	9.75	0.363	25.616	1.924	0.169	0.209	0.403	0.12	1.064	0	1	0.005	1.98	69.4018	14.423	0.513534	15.6617	not readily biodegradable	0.186619	0.933088	0.429881	0.967687	0.637011	-1.13553	0.497405
imidazolium	C435_A27	0.04	237.46	59.05	6.313	8.4	0.056	0.027	9.167	0.336	24.155	1.933	0.164	0.225	0.292	0	1.049	0	0	0.01	2.801	70.1357	14.1941	0.020415	15.6498	not readily biodegradable	0.0290294	0.6719	0.659292	0.96119	0.633472	-0.679749	0.704921
imidazolium	C435_A49	0.04	237.46	95.11	7.497	8.4	0.056	0.538	9.167	0.336	24.155	1.933	0.164	0.225	0.291	0	1.049	0	0	0.01	1.258	70.0409	14.1749	0.169896	15.6144	not readily biodegradable	0.571941	0.843057	0.636661	0.96119	0.633186	-0.688759	0.809537
imidazolium	C20_A56	0.043	223.43	90.07	5.196	7.9	0.063	0	8.667	0.457	22.628	1.929	0.195	0.402	0.064	0.116	0.972	0	3	0.006	2.146	71.7158	12.6667	0.0150502	15.6024	not readily biodegradable	0.396708	0.645491	0.538394	0.92784	0.625563	-0.623801	0.876564
pyrrolidinium	C180_A57	0.038	198.42	96.07	4.388	7.75	0.095	0.517	7.75	0.09	21.133	1.903	0.169	0.217	0.208	0	0.924	0	0	0.01	1.303	72.043	11.6892	0.684223	15.5836	not readily biodegradable	0.82766	0.953238	0.814327	0.90705	0.62377	-0.930139	1.49312
piperazinium	C872_A28	0.07	171.35	171.21	14.741	6.95	0.081	0.297	7.083	0.074	17.574	1.843	0.208	0.208	0.547	0.09	0.859	0	0	0.009	3.092	73.7184	10.6626	0.0462807	15.5727	not readily biodegradable	0.517999	0.733947	0.603106	0.878896	0.616419	-1.35094	1.59434
imidazolium	C435_A53	0.04	237.46	111.11	8.56	8.4	0.056	0.455	9.167	0.336	24.155	1.933	0.164	0.225	0.286	0.163	1.049	0	0	0.01	1.673	70.1253	14.192	0.120543	15.5621	not readily biodegradable	0.425922	0.815256	0.616342	0.96119	0.631759	-0.676709	0.863915
piperazinium	C871_A27	0.076	157.32	59.05	6.313	6.45	0.075	0.027	6.583	0.01	16.047	1.829	0.2	0.208	0.292	0	0.676	0	0	0.012	2.801	76.4491	8.00113	0.00594619	15.5438	not readily biodegradable	0.757603	0.565368	0.858029	0.799634	0.604642	-0.859205	1.60155
pyrrolidinium	C182_A62	0.033	226.48	121.12	10.465	8.75	0.099	0	8.75	0.381	24.187	1.915	0.162	0.181	0.308	0.085	0.983	0	0	0.008	2.513	71.275	12.836	0.345559	15.5434	not readily biodegradable	0.127488	0.898959	0.516255	0.932604	0.626302	-1.73821	0.932345
piperazinium	C871_A15	0.076	157.32	95.11	7.497	6.45	0.075	0.538	6.583	0.01	16.047	1.829	0.2	0.208	0.291	0	0.676	0	0	0.012	4.4469	76.4269	7.9988	0.0495375	15.5248	not readily biodegradable	0.178485	0.736524	0.835398	0.799634	0.604356	-0.868215	1.70617
imidazolium	C20_A67	0.043	223.43	197.65	2.652	7.9	0.063	0	8.667	0.457	22.628	1.929	0.195	0.402	0.057	0	0.972	0	0	0.006	0.863	71.7875	12.6793	0.0150652	15.5181	not readily biodegradable	0.848138	0.645491	0.587021	0.92784	0.623565	-0.69622	1.16609
piperazinium	C870_A62	0.082	143.29	121.12	10.465	5.95	0.072	0	6.083	0	14.521	1.813	0.209	0.209	0.308	0.085	0.391	0	0	0.007	2.513	79.4662	5.02503	0.0024971	15.5062	not readily biodegradable	0.996061	0.492206	0.678362	0.676193	0.592098	-1.04469	1.78942
piperazinium	C865_A28	0.029	157.32	171.21	14.741	5.7	0.081	0.297	5.833	0.213	16.047	1.948	0.184	0.235	0.547	0.09	0.525	0	0	0.01	3.092	78.2184	6.2683	0.0104084	15.5029	not readily biodegradable	0.655213	0.608715	0.557317	0.734232	0.596844	-1.26563	1.73928
imidazolium	C20_A69	0.043	223.43	180.15	8.406	7.9	0.063	0.529	8.667	0.457	22.628	1.929	0.195	0.402	0.052	0.125	0.972	0	0	0.006	2.21	71.7522	12.6731	0.135213	15.4395	not readily biodegradable	0.37419	0.822676	0.477037	0.92784	0.622138	-0.387999	1.26601
piperidinium	C261_A4	0.035	212.45	125.14	10.406	8.25	0.101	0.416	8.25	0.365	22.66	1.91	0.197	0.266	0.562	0.13	1.061	0	0	0.006	2	69.137	14.292	1.13693	15.4341	not readily biodegradable	0.445204	0.997553	0.483029	0.966388	0.633619	-1.51294	1.16361
imidazolium	C40_A33	0.04	237.46	45.02	2.927	8.4	0.059	0	9.167	0.345	24.155	1.933	0.153	0.253	-0.03	0	1.048	0	0	0.008	1.42	70.3879	14.22	0.0217928	15.3703	not readily biodegradable	0.514941	0.676882	0.677642	0.960757	0.626717	-0.450057	0.776391
pyrrolidinium	C182_A27	0.033	226.48	59.05	6.313	8.75	0.099	0.027	8.75	0.381	24.187	1.915	0.162	0.181	0.292	0	0.983	0	0	0.008	2.801	71.4074	12.8599	0.387241	15.3454	not readily biodegradable	0.0261539	0.908002	0.595618	0.932604	0.621736	-1.45498	0.885044
piperazinium	C874_A63	0.06	199.41	87.06	8.284	7.95	0.08	0.482	8.083	0.155	20.628	1.865	0.2	0.277	0.245	0.152	0.872	0	0	0.01	1.495	73.4751	10.8745	0.324475	15.3259	not readily biodegradable	0.805483	0.891423	0.708616	0.884527	0.612504	-1.18457	1.24856
piperidinium	C261_A28	0.035	212.45	171.21	14.741	8.25	0.101	0.297	8.25	0.365	22.66	1.91	0.197	0.266	0.547	0.09	1.061	0	0	0.006	3.092	69.5912	14.3859	0.698455	15.3245	not readily biodegradable	0.0609782	0.957695	0.400169	0.966388	0.629338	-1.77758	1.17173
piperazinium	C874_A64	0.06	199.41	132.08	11.425	7.95	0.08	0.344	8.083	0.155	20.628	1.865	0.2	0.277	0.243	0.131	0.872	0	0	0.01	2.425	73.6001	10.893	0.183334	15.3236	not readily biodegradable	0.478258	0.8452	0.648578	0.884527	0.611933	-1.27405	1.34037
piperazinium	C870_A27	0.082	143.29	59.05	6.313	5.95	0.072	0.027	6.083	0	14.521	1.813	0.209	0.209	0.292	0	0.391	0	0	0.007	2.801	79.6508	5.0367	0.00279961	15.3097	not readily biodegradable	0.894727	0.501249	0.757724	0.676193	0.587532	-0.761452	1.74212
imidazolium	C9_A4	0.043	223.43	125.14	10.406	7.9	0.071	0.416	8.667	0.577	22.628	1.929	0.19	0.25	0.562	0.13	0.976	0	0	0.005	2	71.7916	12.77	0.134541	15.3038	not readily biodegradable	0.448079	0.82223	0.360108	0.929572	0.619228	-0.674699	0.957412
piperazinium	C870_A15	0.082	143.29	95.11	7.497	5.95	0.072	0.538	6.083	0	14.521	1.813	0.209	0.209	0.291	0	0.391	0	0	0.007	4.4469	79.646	5.03639	0.0233288	15.2943	not readily biodegradable	0.315609	0.672406	0.735093	0.676193	0.587246	-0.770463	1.84673
pyrrolidinium	C479_A64	0.033	226.48	132.08	11.425	8.75	0.094	0.344	8.75	0.304	24.187	1.915	0.162	0.202	0.243	0.131	1.096	0	0	0.012	2.425	68.641	15.0952	1.03822	15.2256	not readily biodegradable	0.158451	0.990803	0.619006	0.981547	0.631612	-1.57703	1.04544
piperidinium	C283_A54	0.033	226.48	162.16	11.879	8.75	0.097	0.311	8.75	0.262	24.187	1.915	0.172	0.202	0.4	0.091	1.064	1	1	0.007	2.792	69.3129	14.4045	1.08771	15.1949	not readily biodegradable	0.0293206	0.993776	0.525403	0.967687	0.627938	-1.69816	1.07635
piperazinium	C872_A71	0.07	171.35	164.2	20.105	6.95	0.081	0.587	7.083	0.074	17.574	1.843	0.208	0.208	0.516	0.112	0.859	0	2	0.009	3.451	73.9644	10.6982	0.154677	15.1828	not readily biodegradable	0.391683	0.831081	0.500577	0.878896	0.607571	-1.38933	1.5541
imidazolium	C30_A65	0.043	223.43	124.16	12.137	7.9	0.058	0.435	8.667	0.338	22.628	1.929	0.178	0.235	0.403	0.12	0.968	0	1	0.007	1.98	72.1187	12.6481	0.0688778	15.1643	not readily biodegradable	0.455116	0.767815	0.483942	0.926107	0.614985	-0.728402	0.927814
pyrrolidinium	C181_A62	0.035	212.45	121.12	10.465	8.25	0.097	0	8.25	0.128	22.66	1.91	0.176	0.221	0.308	0.085	0.928	0	0	0.008	2.513	72.7885	11.894	0.168982	15.1485	not readily biodegradable	0.264702	0.839515	0.637861	0.908782	0.611809	-1.65438	1.0813
imidazolium	C9_A28	0.043	223.43	171.21	14.741	7.9	0.071	0.297	8.667	0.577	22.628	1.929	0.19	0.25	0.547	0.09	0.976	0	0	0.005	3.092	71.9806	12.8037	0.0823303	15.1334	not readily biodegradable	0.0638536	0.782371	0.277248	0.929572	0.614947	-0.939339	0.965534
imidazolium	C30_A54	0.043	223.43	162.16	11.879	7.9	0.058	0.311	8.667	0.338	22.628	1.929	0.178	0.235	0.4	0.091	0.968	1	1	0.007	2.792	72.169	12.6569	0.0412035	15.1329	not readily biodegradable	0.16941	0.726282	0.488874	0.926107	0.614129	-0.776099	1.01911
piperazinium	C865_A71	0.029	157.32	164.2	20.105	5.7	0.081	0.587	5.833	0.213	16.047	1.948	0.184	0.235	0.516	0.112	0.525	0	2	0.01	3.451	78.5492	6.29481	0.0348174	15.1212	not readily biodegradable	0.528897	0.705849	0.454789	0.734232	0.587997	-1.30403	1.69904
imidazolium	C435_A63	0.04	237.46	87.06	8.284	8.4	0.056	0.482	9.167	0.336	24.155	1.933	0.164	0.225	0.245	0.152	1.049	0	0	0.01	1.495	70.5197	14.2718	0.135591	15.073	not readily biodegradable	0.488552	0.8243	0.621618	0.96119	0.620057	-0.712318	0.773502
imidazolium	C435_A64	0.04	237.46	132.08	11.425	8.4	0.056	0.344	9.167	0.336	24.155	1.933	0.164	0.225	0.243	0.131	1.049	0	0	0.01	2.425	70.5809	14.2842	0.0765474	15.0583	not readily biodegradable	0.161327	0.778077	0.56158	0.96119	0.619487	-0.801799	0.865314
imidazolium	C21_A65	0.04	237.46	124.16	12.137	8.4	0.066	0.435	9.167	0.081	24.155	1.933	0.164	0.185	0.403	0.12	1.049	0	1	0.012	1.98	70.4871	14.2652	0.199005	15.0487	not readily biodegradable	0.317902	0.85531	0.712582	0.96119	0.619702	-0.875242	0.804933
imidazolium	C21_A54	0.04	237.46	162.16	11.879	8.4	0.066	0.311	9.167	0.081	24.155	1.933	0.164	0.185	0.4	0.091	1.049	1	1	0.012	2.792	70.5728	14.2826	0.119109	15.0255	not readily biodegradable	0.0321961	0.813777	0.717513	0.96119	0.618846	-0.922939	0.896232
imidazolium	C20_A14	0.043	223.43	58.09	1.345	7.9	0.063	0	8.667	0.457	22.628	1.929	0.195	0.402	0.014	0	0.972	1	0	0.006	1.2517	72.223	12.7562	0.0151566	15.0056	not readily biodegradable	0.711372	0.645491	0.612003	0.92784	0.611292	-0.506524	0.837984
imidazolium	C20_A55	0.043	223.43	62.01	2.925	7.9	0.063	0	8.667	0.457	22.628	1.929	0.195	0.402	0.013	0	0.972	0	0	0.006	1.214	72.233	12.758	0.0151587	14.9938	not readily biodegradable	0.724637	0.645491	0.581802	0.92784	0.611007	-0.0324089	1.08497
piperidinium	C272_A4	0.035	212.45	125.14	10.406	8.25	0.099	0.416	8.25	0.312	22.66	1.91	0.186	0.209	0.562	0.13	1.061	0	0	0.008	2	69.61	14.3898	1.0195	14.9808	not readily biodegradable	0.445204	0.988202	0.550548	0.966388	0.622185	-1.51294	1.16361
piperidinium	C292_A54	0.033	226.48	162.16	11.879	8.75	0.095	0.311	8.75	0.186	24.187	1.915	0.172	0.197	0.4	0.091	1.064	1	1	0.01	2.792	69.5867	14.4614	0.97257	14.9792	not readily biodegradable	0.0293206	0.984425	0.625	0.967687	0.622256	-1.69816	1.07635
piperazinium	C873_A79	0.065	185.38	200.73	4.223	7.45	0.078	0.575	7.583	0.111	19.101	1.855	0.174	0.174	0.124	0	0.865	0	0	0.009	3.5528	73.9954	10.8168	0.230158	14.9577	not readily biodegradable	0.21865	0.863129	0.786365	0.881495	0.602861	-1.15072	1.6908
pyrrolidinium	C181_A27	0.035	212.45	59.05	6.313	8.25	0.097	0.027	8.25	0.128	22.66	1.91	0.176	0.221	0.292	0	0.928	0	0	0.008	2.801	72.9366	11.9182	0.189399	14.9558	not readily biodegradable	0.163368	0.848559	0.717223	0.908782	0.607243	-1.37115	1.034
piperazinium	C871_A64	0.076	157.32	132.08	11.425	6.45	0.075	0.344	6.583	0.01	16.047	1.829	0.2	0.208	0.243	0.131	0.676	0	0	0.012	2.425	76.9732	8.05598	0.0223069	14.9486	not readily biodegradable	0.8899	0.671545	0.760317	0.799634	0.590657	-0.981255	1.76194
pyrrolidinium	C171_A69	0.038	198.42	180.15	8.406	7.75	0.099	0.529	7.75	0.103	21.133	1.903	0.156	0.18	0.052	0.125	0.811	0	0	0.009	2.21	74.3014	9.87254	0.935059	14.891	not readily biodegradable	0.508528	0.975958	0.710255	0.858106	0.600233	-1.16707	1.62997
piperazinium	C874_A57	0.06	199.41	96.07	4.388	7.95	0.08	0.517	8.083	0.155	20.628	1.865	0.2	0.277	0.208	0	0.872	0	0	0.01	1.303	73.82	10.9255	0.376951	14.8776	not readily biodegradable	0.873039	0.903146	0.783085	0.884527	0.601944	-0.770156	1.48134
piperidinium	C272_A28	0.035	212.45	171.21	14.741	8.25	0.099	0.297	8.25	0.312	22.66	1.91	0.186	0.209	0.547	0.09	1.061	0	0	0.008	3.092	70.0319	14.477	0.626	14.8651	not readily biodegradable	0.0609782	0.948344	0.467688	0.966388	0.617903	-1.77758	1.17173
piperazinium	C873_A70	0.065	185.38	120.17	11.655	7.45	0.078	0.092	7.583	0.111	19.101	1.855	0.174	0.174	0.109	0.13	0.865	0	2	0.009	1.852	74.2979	10.861	0.0311481	14.8099	not readily biodegradable	0.817085	0.701351	0.644308	0.881495	0.59858	-1.28477	1.38062
pyrrolidinium	C181_A53	0.035	212.45	111.11	8.56	8.25	0.097	0.455	8.25	0.128	22.66	1.91	0.176	0.221	0.286	0.163	0.928	0	0	0.008	1.673	72.3248	11.8182	1.10911	14.7479	not readily biodegradable	0.56026	0.991915	0.674273	0.908782	0.60553	-1.36811	1.19299
piperidinium	C282_A54	0.035	212.45	162.16	11.879	8.25	0.096	0.311	8.25	0.171	22.66	1.91	0.176	0.197	0.4	0.091	1.038	1	1	0.009	2.792	70.7274	14.0382	0.563164	14.6713	not readily biodegradable	0.166535	0.939007	0.611187	0.956426	0.610797	-1.61434	1.22531
piperidinium	C282_A65	0.035	212.45	124.16	12.137	8.25	0.096	0.435	8.25	0.171	22.66	1.91	0.176	0.197	0.403	0.12	1.038	0	1	0.009	1.98	70.4318	13.9795	0.938132	14.6506	not readily biodegradable	0.452241	0.980541	0.606256	0.956426	0.611653	-1.56664	1.13401
imidazolium	C434_A68	0.043	223.43	153.11	17.981	7.9	0.053	0.463	8.667	0.296	22.628	1.929	0.201	0.214	0.833	0.091	0.97	0	0	0.01	2.518	72.5373	12.7666	0.0582484	14.6379	not readily biodegradable	0.265818	0.753817	0.455493	0.926973	0.602337	-0.891019	0.934743
imidazolium	C435_A57	0.04	237.46	96.07	4.388	8.4	0.056	0.517	9.167	0.336	24.155	1.933	0.164	0.225	0.208	0	1.049	0	0	0.01	1.303	70.8635	14.3414	0.157548	14.6376	not readily biodegradable	0.556108	0.836023	0.696087	0.96119	0.609497	-0.297905	1.00628
piperazinium	C869_A31	0.091	129.26	96.1	6.665	5.45	0.079	0.498	5.583	0	12.994	1.793	0.219	0.242	0.15	0	0.298	0	0	0.005	4.5554	81.0517	4.34823	0.0162174	14.5839	not readily biodegradable	0.414647	0.641642	0.708951	0.635912	0.567753	-0.577264	2.04817
pyrrolidinium	C171_A55	0.038	198.42	62.01	2.925	7.75	0.099	0	7.75	0.103	21.133	1.903	0.156	0.18	0.013	0	0.811	0	0	0.009	1.214	75.3305	10.0093	0.105574	14.5546	not readily biodegradable	0.858976	0.798773	0.815021	0.858106	0.589102	-0.811482	1.44894
imidazolium	C20_A33	0.043	223.43	45.02	2.927	7.9	0.063	0	8.667	0.457	22.628	1.929	0.195	0.402	-0.03	0	0.972	0	0	0.006	1.42	72.6604	12.8335	0.0152484	14.4908	not readily biodegradable	0.652155	0.645491	0.581764	0.92784	0.598735	-0.303218	0.899273
piperidinium	C293_A70	0.031	240.51	120.17	11.655	9.25	0.096	0.092	9.25	0.28	25.714	1.92	0.168	0.248	0.109	0.13	1.064	0	2	0.01	1.852	70.181	14.5849	0.779163	14.4549	not readily biodegradable	0.22285	0.965841	0.5841	0.967687	0.608611	-1.80768	0.813428
pyrrolidinium	C152_A62	0.033	226.48	121.12	10.465	8.75	0.109	0	8.75	0.622	24.187	1.915	0.181	0.238	0.308	0.085	0.998	0	0	0.004	2.513	71.7794	13.2743	0.621032	14.3253	not readily biodegradable	0.127488	0.945711	0.316329	0.939101	0.59895	-1.73821	0.932345
morpholinium	C850_A49	0.061	258.48	95.11	7.497	9.083	0.068	0.538	9.75	0.363	25.616	1.924	0.169	0.209	0.291	0	1.064	0	0	0.005	1.258	70.2862	14.6068	0.797397	14.3096	not readily biodegradable	0.440658	0.967587	0.518571	0.967687	0.605046	-0.94905	0.50201
pyrrolidinium	C181_A64	0.035	212.45	132.08	11.425	8.25	0.097	0.344	8.25	0.128	22.66	1.91	0.176	0.221	0.243	0.131	0.928	0	0	0.008	2.425	73.0483	11.9364	0.706767	14.3085	not readily biodegradable	0.295665	0.954736	0.619511	0.908782	0.593258	-1.4932	1.19439
morpholinium	C850_A53	0.061	258.48	111.11	8.56	9.083	0.068	0.455	9.75	0.363	25.616	1.924	0.169	0.209	0.286	0.163	1.064	0	0	0.005	1.673	70.4969	14.6506	0.566772	14.2858	not readily biodegradable	0.294638	0.939786	0.498253	0.967687	0.603619	-0.936999	0.556388
piperazinium	C873_A56	0.065	185.38	90.07	5.196	7.45	0.078	0	7.583	0.111	19.101	1.855	0.174	0.174	0.064	0.116	0.865	0	3	0.009	2.146	74.7642	10.9292	0.0213976	14.2853	not readily biodegradable	0.713639	0.670536	0.767767	0.881495	0.585737	-1.13292	1.36487
piperazinium	C869_A79	0.091	129.26	200.73	4.223	5.45	0.079	0.575	5.583	0	12.994	1.793	0.219	0.242	0.124	0	0.298	0	0	0.005	3.5528	81.3404	4.36372	0.0224017	14.2735	not readily biodegradable	0.767416	0.667433	0.755628	0.635912	0.560332	-0.784833	2.26175
piperidinium	C283_A62	0.033	226.48	121.12	10.465	8.75	0.097	0	8.75	0.262	24.187	1.915	0.172	0.202	0.308	0.085	1.064	0	0	0.007	2.513	70.7463	14.7024	0.305479	14.2458	not readily biodegradable	0.127488	0.889608	0.552431	0.967687	0.60168	-1.73821	0.932345
piperazinium	C869_A12	0.091	129.26	97.08	5.555	5.45	0.079	0.493	5.583	0	12.994	1.793	0.219	0.242	0.121	0	0.298	0	0	0.005	4.6173	81.3793	4.36581	0.0159487	14.2389	not readily biodegradable	0.392867	0.639967	0.730168	0.635912	0.559476	-0.429269	2.12454
piperazinium	C875_A4	0.057	213.44	125.14	10.406	8.45	0.082	0.416	8.583	0.243	22.155	1.873	0.199	0.188	0.562	0.13	0.97	0	0	0.008	2	72.4967	12.7594	0.508433	14.2354	not readily biodegradable	0.490582	0.92876	0.583713	0.926973	0.594006	-1.35296	1.15182
pyrrolidinium	C152_A27	0.033	226.48	59.05	6.313	8.75	0.109	0.027	8.75	0.622	24.187	1.915	0.181	0.238	0.292	0	0.998	0	0	0.004	2.801	71.8797	13.2928	0.695624	14.1318	not readily biodegradable	0.0261539	0.954755	0.395691	0.939101	0.594383	-1.45498	0.885044
piperazinium	C873_A69	0.065	185.38	180.15	8.406	7.45	0.078	0.529	7.583	0.111	19.101	1.855	0.174	0.174	0.052	0.125	0.865	0	0	0.009	2.21	74.7572	10.9281	0.192124	14.1225	not readily biodegradable	0.691121	0.847722	0.70641	0.881495	0.582312	-0.897123	1.75431
pyrrolidinium	C134_A54	0.035	212.45	162.16	11.879	8.25	0.092	0.311	8.25	0.096	22.66	1.91	0.176	0.186	0.4	0.091	1.061	1	1	0.01	2.792	70.8124	14.6383	0.447244	14.1021	not readily biodegradable	0.166535	0.920306	0.668259	0.966388	0.598298	-1.61434	1.22531
piperazinium	C866_A4	0.027	171.35	125.14	10.406	6.2	0.085	0.416	6.333	0.309	17.574	1.953	0.179	0.193	0.562	0.13	0.668	0	0	0.008	2	77.8317	8.03144	0.0397906	14.097	not readily biodegradable	0.902224	0.717367	0.55199	0.796169	0.569711	-1.0863	1.58622
pyrrolidinium	C134_A65	0.035	212.45	124.16	12.137	8.25	0.092	0.435	8.25	0.096	22.66	1.91	0.176	0.186	0.403	0.12	1.061	0	1	0.01	1.98	70.572	14.5886	0.745617	14.0937	not readily biodegradable	0.452241	0.961839	0.663327	0.966388	0.599155	-1.56664	1.13401
piperazinium	C875_A28	0.057	213.44	171.21	14.741	8.45	0.082	0.297	8.583	0.243	22.155	1.873	0.199	0.188	0.547	0.09	0.97	0	0	0.008	3.092	72.7861	12.8103	0.311549	14.092	not readily biodegradable	0.106357	0.888901	0.500853	0.926973	0.589725	-1.6176	1.15994
imidazolium	C31_A66	0.04	237.46	135.11	14.945	8.4	0.061	0.139	9.167	0.401	24.155	1.933	0.164	0.307	-0.172	0.133	1.038	0	0	0.006	2.622	71.654	14.2221	0.0443444	14.0796	not readily biodegradable	0.0920114	0.73279	0.378966	0.956426	0.594215	-0.883753	0.833836
imidazolium	C30_A62	0.043	223.43	121.12	10.465	7.9	0.058	0	8.667	0.338	22.628	1.929	0.178	0.235	0.308	0.085	0.968	0	0	0.007	2.513	73.1015	12.8204	0.0114838	14.0666	not readily biodegradable	0.267578	0.622114	0.515901	0.926107	0.587871	-0.816144	0.875104
piperidinium	C283_A27	0.033	226.48	59.05	6.313	8.75	0.097	0.027	8.75	0.262	24.187	1.915	0.172	0.202	0.292	0	1.064	0	0	0.007	2.801	70.8705	14.7282	0.342293	14.0589	not readily biodegradable	0.0261539	0.898651	0.631793	0.967687	0.597114	-1.45498	0.885044
piperidinium	C292_A62	0.033	226.48	121.12	10.465	8.75	0.095	0	8.75	0.186	24.187	1.915	0.172	0.197	0.308	0.085	1.064	0	0	0.01	2.513	70.9565	14.7461	0.272875	14.0246	not readily biodegradable	0.127488	0.880257	0.652028	0.967687	0.595999	-1.73821	0.932345
piperidinium	C293_A56	0.031	240.51	90.07	5.196	9.25	0.096	0	9.25	0.28	25.714	1.92	0.168	0.248	0.064	0.116	1.064	0	3	0.01	2.146	70.7765	14.7087	0.536432	13.9784	not readily biodegradable	0.119405	0.935026	0.707559	0.967687	0.595767	-1.65583	0.797677
imidazolium	C21_A62	0.04	237.46	121.12	10.465	8.4	0.066	0	9.167	0.081	24.155	1.933	0.164	0.185	0.308	0.085	1.049	0	0	0.012	2.513	71.5159	14.4734	0.0332115	13.9775	not readily biodegradable	0.130364	0.709609	0.744541	0.96119	0.592588	-0.962983	0.752222
pyridinium	C219_A4	0.029	164.3	125.14	10.406	6.2	0.042	0.416	7	0.146	16.499	1.861	0.206	0.169	0.562	0.13	0.472	0	0	0.008	2	80.2037	5.85251	0.00339813	13.9404	not readily biodegradable	0.998822	0.51633	0.630337	0.711276	0.557521	0.252621	1.43655
piperazinium	C866_A28	0.027	171.35	171.21	14.741	6.2	0.085	0.297	6.333	0.309	17.574	1.953	0.179	0.193	0.547	0.09	0.668	0	0	0.008	3.092	78.0012	8.04892	0.0243381	13.9255	not readily biodegradable	0.517999	0.677509	0.46913	0.796169	0.56543	-1.35094	1.59434
piperidinium	C293_A67	0.031	240.51	197.65	2.652	9.25	0.096	0	9.25	0.28	25.714	1.92	0.168	0.248	0.057	0	1.064	0	0	0.01	0.863	70.8413	14.7222	0.536923	13.8996	not readily biodegradable	0.570835	0.935026	0.756186	0.967687	0.59377	-1.72825	1.0872
piperazinium	C874_A79	0.06	199.41	200.73	4.223	7.95	0.08	0.575	8.083	0.155	20.628	1.865	0.2	0.277	0.124	0	0.872	0	0	0.01	3.5528	74.588	11.0392	0.484503	13.8883	not readily biodegradable	0.0814361	0.922572	0.786239	0.884527	0.57797	-1.26069	1.55467
imidazolium	C30_A27	0.043	223.43	59.05	6.313	7.9	0.058	0.027	8.667	0.338	22.628	1.929	0.178	0.235	0.292	0	0.968	0	0	0.007	2.801	73.2552	12.8474	0.0128722	13.8845	not readily biodegradable	0.166243	0.631158	0.595263	0.926107	0.583305	-0.53291	0.827802
piperazinium	C872_A65	0.07	171.35	124.16	12.137	6.95	0.081	0.435	7.083	0.074	17.574	1.843	0.208	0.208	0.403	0.12	0.859	0	1	0.009	1.98	75.1703	10.8726	0.0836655	13.8734	not readily biodegradable	0.909261	0.78017	0.652879	0.878896	0.57532	-1.14	1.55662
imidazolium	C30_A49	0.043	223.43	95.11	7.497	7.9	0.058	0.538	8.667	0.338	22.628	1.929	0.178	0.235	0.291	0	0.968	0	0	0.007	1.258	73.1958	12.837	0.107182	13.8601	not readily biodegradable	0.709155	0.802314	0.572632	0.926107	0.583019	-0.54192	0.932419
piperazinium	C871_A31	0.076	157.32	96.1	6.665	6.45	0.075	0.498	6.583	0.01	16.047	1.829	0.2	0.208	0.15	0	0.676	0	0	0.012	4.5554	77.9455	8.15774	0.0427956	13.8539	not readily biodegradable	0.140308	0.723127	0.851301	0.799634	0.564114	-0.760323	1.76267
piperazinium	C872_A54	0.07	171.35	162.16	11.879	6.95	0.081	0.311	7.083	0.074	17.574	1.843	0.208	0.208	0.4	0.091	0.859	1	1	0.009	2.792	75.2255	10.8806	0.0500515	13.8439	not readily biodegradable	0.623555	0.738637	0.657811	0.878896	0.574464	-1.1877	1.64792
piperidinium	C292_A27	0.033	226.48	59.05	6.313	8.75	0.095	0.027	8.75	0.186	24.187	1.915	0.172	0.197	0.292	0	1.064	0	0	0.01	2.801	71.0822	14.7722	0.305764	13.8398	not readily biodegradable	0.0261539	0.889301	0.73139	0.967687	0.591432	-1.45498	0.885044
morpholinium	C850_A64	0.061	258.48	132.08	11.425	9.083	0.068	0.344	9.75	0.363	25.616	1.924	0.169	0.209	0.243	0.131	1.064	0	0	0.005	2.425	71.046	14.7647	0.360376	13.8289	not readily biodegradable	0.0300434	0.902608	0.44349	0.967687	0.591346	-1.06209	0.557787
morpholinium	C850_A63	0.061	258.48	87.06	8.284	9.083	0.068	0.482	9.75	0.363	25.616	1.924	0.169	0.209	0.245	0.152	1.064	0	0	0.005	1.495	70.8303	14.7199	0.636959	13.8129	not readily biodegradable	0.357268	0.94883	0.503528	0.967687	0.591917	-0.972608	0.465974
imidazolium	C30_A53	0.043	223.43	111.11	8.56	7.9	0.058	0.455	8.667	0.338	22.628	1.929	0.178	0.235	0.286	0.163	0.968	0	0	0.007	1.673	73.2667	12.8494	0.0760287	13.8079	not readily biodegradable	0.563136	0.774514	0.552314	0.926107	0.581592	-0.529869	0.986797
imidazolium	C21_A27	0.04	237.46	59.05	6.313	8.4	0.066	0.027	9.167	0.081	24.155	1.933	0.164	0.185	0.292	0	1.049	0	0	0.012	2.801	71.6629	14.5032	0.0372249	13.7967	not readily biodegradable	0.0290294	0.718653	0.823903	0.96119	0.588022	-0.679749	0.704921
pyrrolidinium	C479_A70	0.033	226.48	120.17	11.655	8.75	0.094	0.092	8.75	0.304	24.187	1.915	0.162	0.202	0.109	0.13	1.096	0	2	0.012	1.852	70.3641	15.4741	0.374071	13.7877	not readily biodegradable	0.360064	0.906397	0.614609	0.981547	0.593367	-1.69771	0.949557
piperazinium	C874_A70	0.06	199.41	120.17	11.655	7.95	0.08	0.092	8.083	0.155	20.628	1.865	0.2	0.277	0.109	0.13	0.872	0	2	0.01	1.852	75.0507	11.1077	0.0657077	13.7759	not readily biodegradable	0.679871	0.760794	0.644182	0.884527	0.573689	-1.39473	1.24449
pyridinium	C219_A28	0.029	164.3	171.21	14.741	6.2	0.042	0.297	7	0.146	16.499	1.861	0.206	0.169	0.547	0.09	0.472	0	0	0.008	3.092	80.3669	5.86442	0.00207819	13.7666	not readily biodegradable	0.614597	0.476472	0.547476	0.711276	0.55324	-0.0120194	1.44467
pyrrolidinium	C180_A69	0.038	198.42	180.15	8.406	7.75	0.095	0.529	7.75	0.09	21.133	1.903	0.169	0.217	0.052	0.125	0.924	0	0	0.01	2.21	73.5711	11.9371	0.734408	13.7574	not readily biodegradable	0.508528	0.957257	0.737526	0.90705	0.579246	-1.16707	1.62997
piperazinium	C865_A54	0.029	157.32	162.16	11.879	5.7	0.081	0.311	5.833	0.213	16.047	1.948	0.184	0.235	0.4	0.091	0.525	1	1	0.01	2.792	79.8376	6.39807	0.0112593	13.753	not readily biodegradable	0.760769	0.613404	0.612022	0.734232	0.55489	-1.10239	1.79286
imidazolium	C21_A49	0.04	237.46	95.11	7.497	8.4	0.066	0.538	9.167	0.081	24.155	1.933	0.164	0.185	0.291	0	1.049	0	0	0.012	1.258	71.4771	14.4656	0.309406	13.7479	not readily biodegradable	0.571941	0.889809	0.801272	0.96119	0.587736	-0.688759	0.809537
imidazolium	C40_A66	0.04	237.46	135.11	14.945	8.4	0.059	0.139	9.167	0.345	24.155	1.933	0.153	0.253	-0.172	0.133	1.048	0	0	0.008	2.622	71.7395	14.493	0.0395413	13.7279	not readily biodegradable	0.0920114	0.72344	0.447927	0.960757	0.586189	-0.883753	0.833836
imidazolium	C21_A53	0.04	237.46	111.11	8.56	8.4	0.066	0.455	9.167	0.081	24.155	1.933	0.164	0.185	0.286	0.163	1.049	0	0	0.012	1.673	71.588	14.488	0.219602	13.7044	not readily biodegradable	0.425922	0.862009	0.780953	0.96119	0.586309	-0.676709	0.863915
piperazinium	C864_A28	0.031	143.29	171.21	14.741	5.2	0.084	0.297	5.333	0.072	14.521	1.943	0.19	0.209	0.547	0.09	0.288	0	0	0.008	3.092	81.9687	4.32037	0.0069772	13.704	not readily biodegradable	0.792337	0.572648	0.583045	0.63158	0.546146	-1.16788	1.87985
piperidinium	C282_A62	0.035	212.45	121.12	10.465	8.25	0.096	0	8.25	0.171	22.66	1.91	0.176	0.197	0.308	0.085	1.038	0	0	0.009	2.513	71.8914	14.2692	0.157508	13.6819	not readily biodegradable	0.264702	0.83484	0.638215	0.956426	0.58454	-1.65438	1.0813
imidazolium	C39_A4	0.043	223.43	125.14	10.406	7.9	0.056	0.416	8.667	0.309	22.628	1.929	0.19	0.214	0.562	0.13	0.977	0	0	0.008	2	73.2387	13.0505	0.0575742	13.6532	not readily biodegradable	0.448079	0.7521	0.55199	0.930005	0.578323	-0.674699	0.957412
imidazolium	C436_A57	0.038	251.49	96.07	4.388	8.9	0.059	0.517	9.667	0.407	25.681	1.937	0.166	0.223	0.208	0	1.114	0	0	0.01	1.303	70.1023	15.915	0.34489	13.6378	not readily biodegradable	0.418984	0.900141	0.66196	0.989344	0.591181	-0.394176	0.861701
piperidinium	C261_A54	0.035	212.45	162.16	11.879	8.25	0.101	0.311	8.25	0.365	22.66	1.91	0.197	0.266	0.4	0.091	1.061	1	1	0.006	2.792	70.9486	14.6665	0.754668	13.6303	not readily biodegradable	0.166535	0.962384	0.454874	0.966388	0.587383	-1.61434	1.22531
piperazinium	C870_A31	0.082	143.29	96.1	6.665	5.95	0.072	0.498	6.083	0	14.521	1.813	0.209	0.209	0.15	0	0.391	0	0	0.007	4.5554	81.2241	5.13619	0.0201527	13.6196	not readily biodegradable	0.277433	0.659008	0.750996	0.676193	0.547004	-0.662571	1.90323
piperazinium	C866_A71	0.027	171.35	164.2	20.105	6.2	0.085	0.587	6.333	0.309	17.574	1.953	0.179	0.193	0.516	0.112	0.668	0	2	0.008	3.451	78.2787	8.07755	0.0813598	13.5624	not readily biodegradable	0.391683	0.774643	0.366601	0.796169	0.556582	-1.38933	1.5541
piperazinium	C871_A79	0.076	157.32	200.73	4.223	6.45	0.075	0.575	6.583	0.01	16.047	1.829	0.2	0.208	0.124	0	0.676	0	0	0.012	3.5528	78.202	8.18459	0.059099	13.5543	not readily biodegradable	0.493078	0.748917	0.897978	0.799634	0.556694	-0.967892	1.97624
imidazolium	C435_A70	0.04	237.46	120.17	11.655	8.4	0.056	0.092	9.167	0.336	24.155	1.933	0.164	0.225	0.109	0.13	1.049	0	2	0.01	1.852	71.8906	14.5492	0.0274038	13.5328	not readily biodegradable	0.36294	0.693671	0.557184	0.96119	0.581242	-0.922483	0.769434
piperazinium	C871_A12	0.076	157.32	97.08	5.555	6.45	0.075	0.493	6.583	0.01	16.047	1.829	0.2	0.208	0.121	0	0.676	0	0	0.012	4.6173	78.2462	8.18922	0.0420786	13.5225	not readily biodegradable	0.118529	0.721452	0.872518	0.799634	0.555837	-0.612328	1.83903
piperidinium	C291_A4	0.035	212.45	125.14	10.406	8.25	0.094	0.416	8.25	0.144	22.66	1.91	0.186	0.176	0.562	0.13	1.061	0	0	0.01	2	71.0181	14.6808	0.778611	13.5224	not readily biodegradable	0.445204	0.964826	0.673343	0.966388	0.584689	-1.51294	1.16361
piperidinium	C282_A27	0.035	212.45	59.05	6.313	8.25	0.096	0.027	8.25	0.171	22.66	1.91	0.176	0.197	0.292	0	1.038	0	0	0.009	2.801	72.0263	14.296	0.176511	13.5012	not readily biodegradable	0.163368	0.843883	0.717577	0.956426	0.579973	-1.37115	1.034
imidazolium	C39_A28	0.043	223.43	171.21	14.741	7.9	0.056	0.297	8.667	0.309	22.628	1.929	0.19	0.214	0.547	0.09	0.977	0	0	0.008	3.092	73.3975	13.0788	0.0352152	13.4884	not readily biodegradable	0.0638536	0.712242	0.46913	0.930005	0.574042	-0.939339	0.965534
pyrrolidinium	C480_A70	0.031	240.51	120.17	11.655	9.25	0.095	0.092	9.25	0.194	25.714	1.92	0.16	0.196	0.109	0.13	1.114	0	2	0.009	1.852	69.9198	15.8736	0.732582	13.474	not readily biodegradable	0.22285	0.961165	0.604414	0.989344	0.588313	-1.80768	0.813428
imidazolium	C9_A65	0.043	223.43	124.16	12.137	7.9	0.071	0.435	8.667	0.577	22.628	1.929	0.19	0.25	0.403	0.12	0.976	0	1	0.005	1.98	73.3376	13.045	0.148712	13.4687	not readily biodegradable	0.455116	0.828593	0.327021	0.929572	0.573849	-0.728402	0.927814
imidazolium	C9_A54	0.043	223.43	162.16	11.879	7.9	0.071	0.311	8.667	0.577	22.628	1.929	0.19	0.25	0.4	0.091	0.976	1	1	0.005	2.792	73.4098	13.0579	0.0889869	13.4433	not readily biodegradable	0.16941	0.78706	0.331953	0.929572	0.572992	-0.776099	1.01911
piperidinium	C293_A14	0.031	240.51	58.09	1.345	9.25	0.096	0	9.25	0.28	25.714	1.92	0.168	0.248	0.014	0	1.064	1	0	0.01	1.2517	71.2353	14.804	0.539909	13.4208	not readily biodegradable	0.434069	0.935026	0.781168	0.967687	0.581497	-1.53856	0.759096
pyridinium	C219_A71	0.029	164.3	164.2	20.105	6.2	0.042	0.587	7	0.146	16.499	1.861	0.206	0.169	0.516	0.112	0.472	0	2	0.008	3.451	80.6948	5.88835	0.00695077	13.4099	not readily biodegradable	0.488281	0.573606	0.444948	0.711276	0.544392	-0.0504117	1.40442
piperidinium	C293_A55	0.031	240.51	62.01	2.925	9.25	0.096	0	9.25	0.28	25.714	1.92	0.168	0.248	0.013	0	1.064	0	0	0.01	1.214	71.2443	14.8059	0.539977	13.4097	not readily biodegradable	0.447333	0.935026	0.750967	0.967687	0.581212	-1.06444	1.00609
pyrrolidinium	C180_A55	0.038	198.42	62.01	2.925	7.75	0.095	0	7.75	0.09	21.133	1.903	0.169	0.217	0.013	0	0.924	0	0	0.01	1.214	74.4315	12.0767	0.0827425	13.409	not readily biodegradable	0.858976	0.780072	0.842291	0.90705	0.568115	-0.811482	1.44894
piperidinium	C291_A28	0.035	212.45	171.21	14.741	8.25	0.094	0.297	8.25	0.144	22.66	1.91	0.186	0.176	0.547	0.09	1.061	0	0	0.01	3.092	71.371	14.7538	0.477568	13.3977	not readily biodegradable	0.0609782	0.924968	0.590483	0.966388	0.580407	-1.77758	1.17173
morpholinium	C850_A57	0.061	258.48	96.07	4.388	9.083	0.068	0.517	9.75	0.363	25.616	1.924	0.169	0.209	0.208	0	1.064	0	0	0.005	1.303	71.0969	14.7753	0.739287	13.3885	not readily biodegradable	0.424825	0.960553	0.577997	0.967687	0.581357	-0.558196	0.698753
imidazolium	C30_A63	0.043	223.43	87.06	8.284	7.9	0.058	0.482	8.667	0.338	22.628	1.929	0.178	0.235	0.245	0.152	0.968	0	0	0.007	1.495	73.6501	12.9167	0.0854868	13.3477	not readily biodegradable	0.625766	0.783557	0.557589	0.926107	0.569891	-0.565479	0.896383
piperazinium	C864_A71	0.031	143.29	164.2	20.105	5.2	0.084	0.587	5.333	0.072	14.521	1.943	0.19	0.209	0.516	0.112	0.288	0	2	0.008	3.451	82.2945	4.33754	0.0233337	13.3447	not readily biodegradable	0.666021	0.669782	0.480516	0.63158	0.537299	-1.20627	1.8396
imidazolium	C30_A64	0.043	223.43	132.08	11.425	7.9	0.058	0.344	8.667	0.338	22.628	1.929	0.178	0.235	0.243	0.131	0.968	0	0	0.007	2.425	73.6965	12.9248	0.0482498	13.3305	not readily biodegradable	0.298541	0.737335	0.497552	0.926107	0.56932	-0.65496	0.988196
piperazinium	C870_A79	0.082	143.29	200.73	4.223	5.95	0.072	0.575	6.083	0	14.521	1.813	0.209	0.209	0.124	0	0.391	0	0	0.007	3.5528	81.4981	5.15352	0.0278324	13.3205	not readily biodegradable	0.630202	0.684799	0.797673	0.676193	0.539584	-0.87014	2.11681
piperidinium	C282_A53	0.035	212.45	111.11	8.56	8.25	0.096	0.455	8.25	0.171	22.66	1.91	0.176	0.197	0.286	0.163	1.038	0	0	0.009	1.673	71.4625	14.1841	1.03422	13.3192	not readily biodegradable	0.56026	0.987239	0.674628	0.956426	0.578261	-1.36811	1.19299
pyrrolidinium	C479_A56	0.033	226.48	90.07	5.196	8.75	0.094	0	8.75	0.304	24.187	1.915	0.162	0.202	0.064	0.116	1.096	0	3	0.012	2.146	70.8548	15.582	0.257151	13.306	not readily biodegradable	0.256619	0.875582	0.738068	0.981547	0.580524	-1.54587	0.933806
pyridinium	C210_A60	0.027	178.33	212.28	25.293	6.283	0.045	0.389	7.167	0.11	18.026	1.913	0.241	0.231	1.154	0.06	0.552	0	3	0.011	4.018	79.9695	6.72196	0.00399495	13.3045	not readily biodegradable	0.151565	0.529628	0.426154	0.745926	0.544724	-0.295534	1.39459
imidazolium	C66_A4	0.04	237.46	125.14	10.406	8.4	0.057	0.416	9.167	0.304	24.155	1.933	0.185	0.195	0.562	0.13	1.038	0	0	0.01	2	72.2457	14.3395	0.111931	13.3029	not readily biodegradable	0.310865	0.806869	0.596438	0.956426	0.574629	-0.821538	0.834531
piperazinium	C870_A12	0.082	143.29	97.08	5.555	5.95	0.072	0.493	6.083	0	14.521	1.813	0.209	0.209	0.121	0	0.391	0	0	0.007	4.6173	81.5368	5.15596	0.0198149	13.2874	not readily biodegradable	0.255653	0.657333	0.772213	0.676193	0.538727	-0.514576	1.9796
piperazinium	C874_A56	0.06	199.41	90.07	5.196	7.95	0.08	0	8.083	0.155	20.628	1.865	0.2	0.277	0.064	0.116	0.872	0	3	0.01	2.146	75.5068	11.1752	0.0451298	13.2729	not readily biodegradable	0.576425	0.72998	0.767641	0.884527	0.560845	-1.24289	1.22874
pyrrolidinium	C151_A28	0.035	212.45	171.21	14.741	8.25	0.108	0.297	8.25	0.515	22.66	1.91	0.197	0.209	0.547	0.09	0.88	0	0	0.005	3.092	74.4503	11.1757	1.12078	13.2532	not readily biodegradable	0.0609782	0.990422	0.307048	0.887992	0.564572	-1.77758	1.17173
imidazolium	C32_A57	0.038	251.49	96.07	4.388	8.9	0.064	0.517	9.667	0.522	25.681	1.937	0.171	0.235	0.208	0	1.104	0	0	0.005	1.303	70.5496	15.7359	0.463669	13.2509	not readily biodegradable	0.418984	0.923518	0.501573	0.985012	0.580574	-0.394176	0.861701
imidazolium	C21_A63	0.04	237.46	87.06	8.284	8.4	0.066	0.482	9.167	0.081	24.155	1.933	0.164	0.185	0.245	0.152	1.049	0	0	0.012	1.495	71.946	14.5604	0.246863	13.2467	not readily biodegradable	0.488552	0.871052	0.786229	0.96119	0.574608	-0.712318	0.773502
imidazolium	C21_A64	0.04	237.46	132.08	11.425	8.4	0.066	0.344	9.167	0.081	24.155	1.933	0.164	0.185	0.243	0.131	1.049	0	0	0.012	2.425	72.0417	14.5798	0.13943	13.239	not readily biodegradable	0.161327	0.82483	0.726191	0.96119	0.574037	-0.801799	0.865314
pyrrolidinium	C479_A67	0.033	226.48	197.65	2.652	8.75	0.094	0	8.75	0.304	24.187	1.915	0.162	0.202	0.057	0	1.096	0	0	0.012	0.863	70.9174	15.5958	0.257378	13.2294	not readily biodegradable	0.708049	0.875582	0.786695	0.981547	0.578526	-1.61829	1.22333
pyrrolidinium	C182_A70	0.033	226.48	120.17	11.655	8.75	0.099	0.092	8.75	0.381	24.187	1.915	0.162	0.181	0.109	0.13	0.983	0	2	0.008	1.852	73.0892	13.1628	0.519065	13.229	not readily biodegradable	0.360064	0.929773	0.49351	0.932604	0.569506	-1.69771	0.949557
piperazinium	C873_A33	0.065	185.38	45.02	2.927	7.45	0.078	0	7.583	0.111	19.101	1.855	0.174	0.174	-0.03	0	0.865	0	0	0.009	1.42	75.6944	11.0651	0.0216638	13.2188	not readily biodegradable	0.969086	0.670536	0.811137	0.881495	0.558909	-0.812341	1.38758
piperidinium	C272_A54	0.035	212.45	162.16	11.879	8.25	0.099	0.311	8.25	0.312	22.66	1.91	0.186	0.209	0.4	0.091	1.061	1	1	0.008	2.792	71.3704	14.7537	0.676121	13.1998	not readily biodegradable	0.166535	0.953033	0.522393	0.966388	0.575949	-1.61434	1.22531
piperidinium	C292_A64	0.033	226.48	132.08	11.425	8.75	0.095	0.344	8.75	0.186	24.187	1.915	0.172	0.197	0.243	0.131	1.064	0	0	0.01	2.425	70.936	14.7418	1.13691	13.1853	not readily biodegradable	0.158451	0.995478	0.633678	0.967687	0.577447	-1.57703	1.04544
piperidinium	C272_A65	0.035	212.45	124.16	12.137	8.25	0.099	0.435	8.25	0.312	22.66	1.91	0.186	0.209	0.403	0.12	1.061	0	1	0.008	1.98	71.0205	14.6813	1.12548	13.1727	not readily biodegradable	0.452241	0.994566	0.517462	0.966388	0.576805	-1.56664	1.13401
piperidinium	C525_A67	0.029	254.54	197.65	2.652	9.75	0.094	0	9.75	0.371	27.24	1.924	0.157	0.191	0.057	0	1.064	0	0	0.01	0.863	71.1568	14.7877	0.893379	13.162	not readily biodegradable	0.43371	0.975768	0.712446	0.967687	0.575988	-1.81208	0.938247
pyrrolidinium	C134_A62	0.035	212.45	121.12	10.465	8.25	0.092	0	8.25	0.096	22.66	1.91	0.176	0.186	0.308	0.085	1.061	0	0	0.01	2.513	71.8906	14.8612	0.124935	13.1232	not readily biodegradable	0.264702	0.816139	0.695286	0.966388	0.572041	-1.65438	1.0813
piperazinium	C874_A69	0.06	199.41	180.15	8.406	7.95	0.08	0.529	8.083	0.155	20.628	1.865	0.2	0.277	0.052	0.125	0.872	0	0	0.01	2.21	75.351	11.1521	0.404412	13.0924	not readily biodegradable	0.553907	0.907165	0.706284	0.884527	0.557421	-1.00709	1.61818
piperidinium	C524_A70	0.031	240.51	120.17	11.655	9.25	0.093	0.092	9.25	0.274	25.714	1.92	0.177	0.255	0.109	0.13	1.064	0	2	0.009	1.852	71.4164	14.8417	0.66642	13.0755	not readily biodegradable	0.22285	0.951815	0.565962	0.967687	0.572929	-1.80768	0.813428
piperidinium	C284_A70	0.031	240.51	120.17	11.655	9.25	0.098	0.092	9.25	0.35	25.714	1.92	0.168	0.217	0.109	0.13	1.064	0	2	0.005	1.852	71.2426	14.8056	0.888086	13.0637	not readily biodegradable	0.22285	0.975191	0.445343	0.967687	0.573387	-1.80768	0.813428
imidazolium	C435_A56	0.04	237.46	90.07	5.196	8.4	0.056	0	9.167	0.336	24.155	1.933	0.164	0.225	0.064	0.116	1.049	0	3	0.01	2.146	72.3084	14.6338	0.0188167	13.039	not readily biodegradable	0.259494	0.662857	0.680642	0.96119	0.568399	-0.770641	0.753683
pyrrolidinium	C480_A56	0.031	240.51	90.07	5.196	9.25	0.095	0	9.25	0.194	25.714	1.92	0.16	0.196	0.064	0.116	1.114	0	3	0.009	2.146	70.4806	16.0009	0.504129	13.0144	not readily biodegradable	0.119405	0.93035	0.727873	0.989344	0.575469	-1.65583	0.797677
imidazolium	C435_A67	0.04	237.46	197.65	2.652	8.4	0.056	0	9.167	0.336	24.155	1.933	0.164	0.225	0.057	0	1.049	0	0	0.01	0.863	72.3717	14.6466	0.0188332	12.9629	not readily biodegradable	0.710924	0.662857	0.729269	0.96119	0.566401	-0.843059	1.04321
pyrrolidinium	C134_A27	0.035	212.45	59.05	6.313	8.25	0.092	0.027	8.25	0.096	22.66	1.91	0.176	0.186	0.292	0	1.061	0	0	0.01	2.801	72.0239	14.8888	0.140005	12.9473	not readily biodegradable	0.163368	0.825182	0.774648	0.966388	0.567474	-1.37115	1.034
piperidinium	C293_A33	0.031	240.51	45.02	2.927	9.25	0.096	0	9.25	0.28	25.714	1.92	0.168	0.248	-0.03	0	1.064	0	0	0.01	1.42	71.6306	14.8862	0.542905	12.9403	not readily biodegradable	0.374851	0.935026	0.750929	0.967687	0.568939	-1.33525	0.820386
imidazolium	C30_A57	0.043	223.43	96.07	4.388	7.9	0.058	0.517	8.667	0.338	22.628	1.929	0.178	0.235	0.208	0	0.968	0	0	0.007	1.303	73.9862	12.9756	0.0992992	12.9389	not readily biodegradable	0.693322	0.79528	0.632058	0.926107	0.55933	-0.151066	1.12916
pyrrolidinium	C480_A67	0.031	240.51	197.65	2.652	9.25	0.095	0	9.25	0.194	25.714	1.92	0.16	0.196	0.057	0	1.114	0	0	0.009	0.863	70.5418	16.0148	0.504567	12.9389	not readily biodegradable	0.570835	0.93035	0.776499	0.989344	0.573472	-1.72825	1.0872
piperazinium	C873_A7	0.065	185.38	149.08	7.722	7.45	0.078	0.609	7.583	0.111	19.101	1.855	0.174	0.174	-0.055	0	0.865	0	0	0.009	2.254	75.7459	11.0727	0.271299	12.9102	not readily biodegradable	0.675639	0.874517	0.719484	0.881495	0.551773	-0.754224	1.73119
piperidinium	C282_A64	0.035	212.45	132.08	11.425	8.25	0.096	0.344	8.25	0.171	22.66	1.91	0.176	0.197	0.243	0.131	1.038	0	0	0.009	2.425	72.1251	14.3156	0.658567	12.9008	not readily biodegradable	0.295665	0.950061	0.619865	0.956426	0.565988	-1.4932	1.19439
imidazolium	C20_A66	0.043	223.43	135.11	14.945	7.9	0.063	0.139	8.667	0.457	22.628	1.929	0.195	0.402	-0.172	0.133	0.972	0	0	0.006	2.622	74.0075	13.0714	0.027649	12.8934	not readily biodegradable	0.229225	0.692048	0.352049	0.92784	0.558207	-0.736914	0.956718
imidazolium	C435_A69	0.04	237.46	180.15	8.406	8.4	0.056	0.529	9.167	0.336	24.155	1.933	0.164	0.225	0.052	0.125	1.049	0	0	0.01	2.21	72.308	14.6337	0.168966	12.8893	not readily biodegradable	0.236976	0.840042	0.619286	0.96119	0.564974	-0.534838	1.14313
piperazinium	C871_A56	0.076	157.32	90.07	5.196	6.45	0.075	0	6.583	0.01	16.047	1.829	0.2	0.208	0.064	0.116	0.676	0	3	0.012	2.146	78.854	8.25282	0.00548322	12.8877	not readily biodegradable	0.988067	0.556324	0.87938	0.799634	0.539569	-0.950096	1.65031
pyrrolidinium	C181_A70	0.035	212.45	120.17	11.655	8.25	0.097	0.092	8.25	0.128	22.66	1.91	0.176	0.221	0.109	0.13	0.928	0	2	0.008	1.852	74.6748	12.2022	0.253943	12.8691	not readily biodegradable	0.497278	0.87033	0.615115	0.908782	0.555013	-1.61388	1.09851
piperidinium	C282_A63	0.035	212.45	87.06	8.284	8.25	0.096	0.482	8.25	0.171	22.66	1.91	0.176	0.197	0.245	0.152	1.038	0	0	0.009	1.495	71.7421	14.2396	1.16135	12.857	not readily biodegradable	0.62289	0.996283	0.679903	0.956426	0.566559	-1.40372	1.10258
piperazinium	C869_A1	0.091	129.26	86.81	7.182	5.45	0.079	0.553	5.583	0	12.994	1.793	0.219	0.242	0	0	0.298	0	0	0.005	5.4245	82.6983	4.43657	0.0207887	12.8444	not readily biodegradable	0.10885	0.660064	0.699069	0.635912	0.524942	-0.14459	2.23465
imidazolium	C21_A57	0.04	237.46	96.07	4.388	8.4	0.066	0.517	9.167	0.081	24.155	1.933	0.164	0.185	0.208	0	1.049	0	0	0.012	1.303	72.2519	14.6224	0.286661	12.8391	not readily biodegradable	0.556108	0.882775	0.860698	0.96119	0.564048	-0.297905	1.00628
piperazinium	C872_A62	0.07	171.35	121.12	10.465	6.95	0.081	0	7.083	0.074	17.574	1.843	0.208	0.208	0.308	0.085	0.859	0	0	0.009	2.513	76.1502	11.0143	0.0139412	12.8216	not readily biodegradable	0.721723	0.634469	0.684838	0.878896	0.548207	-1.22775	1.50391
pyrrolidinium	C134_A49	0.035	212.45	95.11	7.497	8.25	0.092	0.538	8.25	0.096	22.66	1.91	0.176	0.186	0.291	0	1.061	0	0	0.01	1.258	71.3007	14.7393	1.155	12.805	not readily biodegradable	0.70628	0.996339	0.752017	0.966388	0.567189	-1.38016	1.13862
pyrrolidinium	C134_A53	0.035	212.45	111.11	8.56	8.25	0.092	0.455	8.25	0.096	22.66	1.91	0.176	0.186	0.286	0.163	1.061	0	0	0.01	1.673	71.5856	14.7982	0.821767	12.7945	not readily biodegradable	0.56026	0.968538	0.731699	0.966388	0.565762	-1.36811	1.19299
pyrrolidinium	C479_A14	0.033	226.48	58.09	1.345	8.75	0.094	0	8.75	0.304	24.187	1.915	0.162	0.202	0.014	0	1.096	1	0	0.012	1.2517	71.2976	15.6794	0.258758	12.7642	not readily biodegradable	0.571283	0.875582	0.811677	0.981547	0.566254	-1.42859	0.895225
pyrrolidinium	C182_A56	0.033	226.48	90.07	5.196	8.75	0.099	0	8.75	0.381	24.187	1.915	0.162	0.181	0.064	0.116	0.983	0	3	0.008	2.146	73.6244	13.2591	0.356949	12.7595	not readily biodegradable	0.256619	0.898959	0.616968	0.932604	0.556663	-1.54587	0.933806
pyrrolidinium	C479_A55	0.033	226.48	62.01	2.925	8.75	0.094	0	8.75	0.304	24.187	1.915	0.162	0.202	0.013	0	1.096	0	0	0.012	1.214	71.3064	15.6813	0.25879	12.7535	not readily biodegradable	0.584548	0.875582	0.781476	0.981547	0.565968	-0.954475	1.14222
piperazinium	C871_A69	0.076	157.32	180.15	8.406	6.45	0.075	0.529	6.583	0.01	16.047	1.829	0.2	0.208	0.052	0.125	0.676	0	0	0.012	2.21	78.9395	8.26177	0.0492906	12.7495	not readily biodegradable	0.965549	0.73351	0.818023	0.799634	0.536144	-0.714294	2.03976
piperazinium	C874_A14	0.06	199.41	58.09	1.345	7.95	0.08	0	8.083	0.155	20.628	1.865	0.2	0.277	0.014	0	0.872	1	0	0.01	1.2517	75.986	11.2461	0.0454162	12.7225	not readily biodegradable	0.891089	0.72998	0.841249	0.884527	0.546575	-1.12561	1.19016
piperazinium	C865_A62	0.029	157.32	121.12	10.465	5.7	0.081	0	5.833	0.213	16.047	1.948	0.184	0.235	0.308	0.085	0.525	0	0	0.01	2.513	80.8071	6.47576	0.00313567	12.714	not readily biodegradable	0.858937	0.509237	0.63905	0.734232	0.528632	-1.14244	1.64885
piperazinium	C869_A45	0.091	129.26	74.07	8.231	5.45	0.079	0.039	5.583	0	12.994	1.793	0.219	0.242	-0.012	0.166	0.298	0	1	0.005	5.2808	82.8409	4.44422	0.00246801	12.7124	not readily biodegradable	0.159411	0.487902	0.679018	0.635912	0.521517	-0.729584	1.90599
piperazinium	C874_A55	0.06	199.41	62.01	2.925	7.95	0.08	0	8.083	0.155	20.628	1.865	0.2	0.277	0.013	0	0.872	0	0	0.01	1.214	75.9955	11.2475	0.0454219	12.7116	not readily biodegradable	0.904354	0.72998	0.811049	0.884527	0.54629	-0.651499	1.43715
piperidinium	C261_A62	0.035	212.45	121.12	10.465	8.25	0.101	0	8.25	0.365	22.66	1.91	0.197	0.266	0.308	0.085	1.061	0	0	0.006	2.513	72.171	14.9192	0.211229	12.6986	not readily biodegradable	0.264702	0.858216	0.481901	0.966388	0.561125	-1.65438	1.0813
piperidinium	C525_A14	0.029	254.54	58.09	1.345	9.75	0.094	0	9.75	0.371	27.24	1.924	0.157	0.191	0.014	0	1.064	1	0	0.01	1.2517	71.5372	14.8668	0.898155	12.6978	not readily biodegradable	0.296944	0.975768	0.737428	0.967687	0.563716	-1.62238	0.610142
piperidinium	C525_A55	0.029	254.54	62.01	2.925	9.75	0.094	0	9.75	0.371	27.24	1.924	0.157	0.191	0.013	0	1.064	0	0	0.01	1.214	71.546	14.8686	0.898265	12.6871	not readily biodegradable	0.310209	0.975768	0.707228	0.967687	0.56343	-1.14827	0.857131
pyrrolidinium	C182_A67	0.033	226.48	197.65	2.652	8.75	0.099	0	8.75	0.381	24.187	1.915	0.162	0.181	0.057	0	0.983	0	0	0.008	0.863	73.6881	13.2706	0.357258	12.684	not readily biodegradable	0.708049	0.898959	0.665595	0.932604	0.554665	-1.61829	1.22333
piperazinium	C872_A27	0.07	171.35	59.05	6.313	6.95	0.081	0.027	7.083	0.074	17.574	1.843	0.208	0.208	0.292	0	0.859	0	0	0.009	2.801	76.3013	11.0362	0.0156249	12.647	not readily biodegradable	0.620389	0.643512	0.7642	0.878896	0.54364	-0.944512	1.45661
piperazinium	C872_A15	0.07	171.35	95.11	7.497	6.95	0.081	0.538	7.083	0.074	17.574	1.843	0.208	0.208	0.291	0	0.859	0	0	0.009	4.4469	76.2234	11.0249	0.130075	12.6216	not readily biodegradable	0.0412707	0.814669	0.741569	0.878896	0.543355	-0.953522	1.56123
piperidinium	C524_A56	0.031	240.51	90.07	5.196	9.25	0.093	0	9.25	0.274	25.714	1.92	0.177	0.255	0.064	0.116	1.064	0	3	0.009	2.146	71.9672	14.9562	0.458459	12.6182	not readily biodegradable	0.119405	0.921	0.689421	0.967687	0.560086	-1.65583	0.797677
piperidinium	C284_A56	0.031	240.51	90.07	5.196	9.25	0.098	0	9.25	0.35	25.714	1.92	0.168	0.217	0.064	0.116	1.064	0	3	0.005	2.146	71.8425	14.9302	0.611382	12.6159	not readily biodegradable	0.119405	0.944376	0.568801	0.967687	0.560544	-1.65583	0.797677
piperidinium	C285_A67	0.029	254.54	197.65	2.652	9.75	0.099	0	9.75	0.505	27.24	1.924	0.174	0.251	0.057	0	1.064	0	0	0.005	0.863	71.3822	14.8346	1.19722	12.586	not readily biodegradable	0.43371	0.999144	0.542927	0.967687	0.561741	-1.81208	0.938247
piperidinium	C524_A67	0.031	240.51	197.65	2.652	9.25	0.093	0	9.25	0.274	25.714	1.92	0.177	0.255	0.057	0	1.064	0	0	0.009	0.863	72.0286	14.9689	0.458851	12.5436	not readily biodegradable	0.570835	0.921	0.738047	0.967687	0.558088	-1.72825	1.0872
pyrrolidinium	C180_A7	0.038	198.42	149.08	7.722	7.75	0.095	0.609	7.75	0.09	21.133	1.903	0.169	0.217	-0.055	0	0.924	0	0	0.01	2.254	74.359	12.065	1.03448	12.5415	not readily biodegradable	0.493047	0.984053	0.7506	0.90705	0.548708	-1.02417	1.60685
piperidinium	C284_A67	0.031	240.51	197.65	2.652	9.25	0.098	0	9.25	0.35	25.714	1.92	0.168	0.217	0.057	0	1.064	0	0	0.005	0.863	71.9038	14.943	0.611904	12.5413	not readily biodegradable	0.570835	0.944376	0.617428	0.967687	0.558546	-1.72825	1.0872
piperazinium	C865_A27	0.029	157.32	59.05	6.313	5.7	0.081	0.027	5.833	0.213	16.047	1.948	0.184	0.235	0.292	0	0.525	0	0	0.01	2.801	80.9703	6.48884	0.00351447	12.5373	not readily biodegradable	0.757603	0.51828	0.718412	0.734232	0.524066	-0.859205	1.60155
piperidinium	C261_A27	0.035	212.45	59.05	6.313	8.25	0.101	0.027	8.25	0.365	22.66	1.91	0.197	0.266	0.292	0	1.061	0	0	0.006	2.801	72.2941	14.9446	0.236672	12.5246	not readily biodegradable	0.163368	0.86726	0.561263	0.966388	0.556559	-1.37115	1.034
piperazinium	C865_A15	0.029	157.32	95.11	7.497	5.7	0.081	0.538	5.833	0.213	16.047	1.948	0.184	0.235	0.291	0	0.525	0	0	0.01	4.4469	80.9596	6.48798	0.0292836	12.5231	not readily biodegradable	0.178485	0.689437	0.695781	0.734232	0.52378	-0.868215	1.70617
piperazinium	C869_A8	0.091	129.26	66.05	4.324	5.45	0.079	0	5.583	0	12.994	1.793	0.219	0.242	-0.031	0.131	0.298	2	0	0.005	5.1256	83.0415	4.45498	0.00210436	12.5014	not readily biodegradable	0.214019	0.47484	0.753697	0.635912	0.516094	-0.633009	1.92962
imidazolium	C435_A14	0.04	237.46	58.09	1.345	8.4	0.056	0	9.167	0.336	24.155	1.933	0.164	0.225	0.014	0	1.049	1	0	0.01	1.2517	72.756	14.7244	0.0189332	12.5007	not readily biodegradable	0.574158	0.662857	0.754251	0.96119	0.554129	-0.653363	0.715102
imidazolium	C435_A55	0.04	237.46	62.01	2.925	8.4	0.056	0	9.167	0.336	24.155	1.933	0.164	0.225	0.013	0	1.049	0	0	0.01	1.214	72.7649	14.7262	0.0189355	12.49	not readily biodegradable	0.587423	0.662857	0.724051	0.96119	0.553843	-0.179248	0.962092
pyrrolidinium	C480_A14	0.031	240.51	58.09	1.345	9.25	0.095	0	9.25	0.194	25.714	1.92	0.16	0.196	0.014	0	1.114	1	0	0.009	1.2517	70.9133	16.0991	0.507224	12.4804	not readily biodegradable	0.434069	0.93035	0.801482	0.989344	0.561199	-1.53856	0.759096
pyrrolidinium	C480_A55	0.031	240.51	62.01	2.925	9.25	0.095	0	9.25	0.194	25.714	1.92	0.16	0.196	0.013	0	1.114	0	0	0.009	1.214	70.9218	16.1011	0.507285	12.4698	not readily biodegradable	0.447333	0.93035	0.771281	0.989344	0.560914	-1.06444	1.00609
piperazinium	C875_A65	0.057	213.44	124.16	12.137	8.45	0.082	0.435	8.583	0.243	22.155	1.873	0.199	0.188	0.403	0.12	0.97	0	1	0.008	1.98	73.9534	13.0158	0.561192	12.4696	not readily biodegradable	0.497619	0.935124	0.550627	0.926973	0.548627	-1.40666	1.12222
piperazinium	C875_A54	0.057	213.44	162.16	11.879	8.45	0.082	0.311	8.583	0.243	22.155	1.873	0.199	0.188	0.4	0.091	0.97	1	1	0.008	2.792	74.1479	13.05	0.33636	12.4658	not readily biodegradable	0.211913	0.893591	0.555558	0.926973	0.547771	-1.45436	1.21352
imidazolium	C9_A62	0.043	223.43	121.12	10.465	7.9	0.071	0	8.667	0.577	22.628	1.929	0.19	0.25	0.308	0.085	0.976	0	0	0.005	2.513	74.3089	13.2178	0.0247851	12.4485	not readily biodegradable	0.267578	0.682893	0.35898	0.929572	0.546735	-0.816144	0.875104
morpholinium	C850_A70	0.061	258.48	120.17	11.655	9.083	0.068	0.092	9.75	0.363	25.616	1.924	0.169	0.209	0.109	0.13	1.064	0	2	0.005	1.852	72.4209	15.0504	0.129115	12.3996	not readily biodegradable	0.231656	0.818202	0.439094	0.967687	0.553102	-1.18277	0.461906
pyrrolidinium	C181_A56	0.035	212.45	90.07	5.196	8.25	0.097	0	8.25	0.128	22.66	1.91	0.176	0.221	0.064	0.116	0.928	0	3	0.008	2.146	75.1519	12.2802	0.174469	12.3935	not readily biodegradable	0.393833	0.839515	0.738573	0.908782	0.54217	-1.46204	1.08276
pyrrolidinium	C134_A64	0.035	212.45	132.08	11.425	8.25	0.092	0.344	8.25	0.096	22.66	1.91	0.176	0.186	0.243	0.131	1.061	0	0	0.01	2.425	72.1811	14.9213	0.522787	12.3749	not readily biodegradable	0.295665	0.931359	0.676937	0.966388	0.553489	-1.4932	1.19439
pyrrolidinium	C134_A63	0.035	212.45	87.06	8.284	8.25	0.092	0.482	8.25	0.096	22.66	1.91	0.176	0.186	0.245	0.152	1.061	0	0	0.01	1.495	71.8733	14.8576	0.92288	12.3461	not readily biodegradable	0.62289	0.977582	0.736974	0.966388	0.55406	-1.40372	1.10258
pyrrolidinium	C181_A67	0.035	212.45	197.65	2.652	8.25	0.097	0	8.25	0.128	22.66	1.91	0.176	0.221	0.057	0	0.928	0	0	0.008	0.863	75.216	12.2906	0.174618	12.3188	not readily biodegradable	0.845263	0.839515	0.7872	0.908782	0.540172	-1.53446	1.37229
piperazinium	C866_A65	0.027	171.35	124.16	12.137	6.2	0.085	0.435	6.333	0.309	17.574	1.953	0.179	0.193	0.403	0.12	0.668	0	1	0.008	1.98	79.4454	8.19795	0.0439472	12.3127	not readily biodegradable	0.909261	0.723731	0.518903	0.796169	0.524331	-1.14	1.55662
pyrrolidinium	C173_A62	0.033	226.48	121.12	10.465	8.75	0.101	0	8.75	0.351	24.187	1.915	0.177	0.181	0.308	0.085	1.089	0	0	0.005	2.513	71.7284	15.5801	0.390464	12.301	not readily biodegradable	0.127488	0.908309	0.467608	0.978516	0.553577	-1.73821	0.932345
pyrrolidinium	C479_A33	0.033	226.48	45.02	2.927	8.75	0.094	0	8.75	0.304	24.187	1.915	0.162	0.202	-0.03	0	1.096	0	0	0.012	1.42	71.6791	15.7633	0.260143	12.2975	not readily biodegradable	0.512065	0.875582	0.781438	0.981547	0.553696	-1.22528	0.956515
piperazinium	C866_A54	0.027	171.35	162.16	11.879	6.2	0.085	0.311	6.333	0.309	17.574	1.953	0.179	0.193	0.4	0.091	0.668	1	1	0.008	2.792	79.4888	8.20243	0.0262858	12.2824	not readily biodegradable	0.623555	0.682198	0.523835	0.796169	0.523475	-1.1877	1.64792
imidazolium	C9_A27	0.043	223.43	59.05	6.313	7.9	0.071	0.027	8.667	0.577	22.628	1.929	0.19	0.25	0.292	0	0.976	0	0	0.005	2.801	74.4512	13.2431	0.0277764	12.2779	not readily biodegradable	0.166243	0.691936	0.438343	0.929572	0.542168	-0.53291	0.827802
piperidinium	C272_A62	0.035	212.45	121.12	10.465	8.25	0.099	0	8.25	0.312	22.66	1.91	0.186	0.209	0.308	0.085	1.061	0	0	0.008	2.513	72.5396	14.9954	0.189086	12.2759	not readily biodegradable	0.264702	0.848866	0.549421	0.966388	0.549691	-1.65438	1.0813
piperazinium	C874_A33	0.06	199.41	45.02	2.927	7.95	0.08	0	8.083	0.155	20.628	1.865	0.2	0.277	-0.03	0	0.872	0	0	0.01	1.42	76.3989	11.3072	0.045663	12.2483	not readily biodegradable	0.831872	0.72998	0.811011	0.884527	0.534017	-0.922308	1.25145
imidazolium	C9_A49	0.043	223.43	95.11	7.497	7.9	0.071	0.538	8.667	0.577	22.628	1.929	0.19	0.25	0.291	0	0.976	0	0	0.005	1.258	74.3089	13.2178	0.231029	12.2423	not readily biodegradable	0.709155	0.863093	0.415711	0.929572	0.541883	-0.54192	0.932419
piperidinium	C525_A33	0.029	254.54	45.02	2.927	9.75	0.094	0	9.75	0.371	27.24	1.924	0.157	0.191	-0.03	0	1.064	0	0	0.01	1.42	71.9188	14.9461	0.902946	12.2321	not readily biodegradable	0.237727	0.975768	0.70719	0.967687	0.551158	-1.41908	0.671431
pyrrolidinium	C182_A14	0.033	226.48	58.09	1.345	8.75	0.099	0	8.75	0.381	24.187	1.915	0.162	0.181	0.014	0	0.983	1	0	0.008	1.2517	74.0752	13.3403	0.359135	12.2253	not readily biodegradable	0.571283	0.898959	0.690577	0.932604	0.542393	-1.42859	0.895225
pyrrolidinium	C182_A55	0.033	226.48	62.01	2.925	8.75	0.099	0	8.75	0.381	24.187	1.915	0.162	0.181	0.013	0	0.983	0	0	0.008	1.214	74.0841	13.3419	0.359178	12.2147	not readily biodegradable	0.584548	0.898959	0.660377	0.932604	0.542107	-0.954475	1.14222
imidazolium	C9_A53	0.043	223.43	111.11	8.56	7.9	0.071	0.455	8.667	0.577	22.628	1.929	0.19	0.25	0.286	0.163	0.976	0	0	0.005	1.673	74.4037	13.2347	0.163929	12.1977	not readily biodegradable	0.563136	0.835292	0.395393	0.929572	0.540456	-0.529869	0.986797
imidazolium	C10_A57	0.038	251.49	96.07	4.388	8.9	0.077	0.517	9.667	0.798	25.681	1.937	0.185	0.271	0.208	0	1.108	0	0	0.005	1.303	70.9173	15.9302	0.989588	12.1629	not readily biodegradable	0.418984	0.984296	0.368913	0.986745	0.553603	-0.394176	0.861701
piperazinium	C867_A68	0.025	185.38	153.11	17.981	6.7	0.088	0.463	6.833	0.357	19.101	1.956	0.2	0.18	0.833	0.091	0.771	0	0	0.007	2.518	78.0695	9.66499	0.107339	12.1582	not readily biodegradable	0.582749	0.797229	0.363106	0.840781	0.52571	-1.40014	1.42305
piperidinium	C285_A14	0.029	254.54	58.09	1.345	9.75	0.099	0	9.75	0.505	27.24	1.924	0.174	0.251	0.014	0	1.064	1	0	0.005	1.2517	71.7518	14.9114	1.20342	12.1334	not readily biodegradable	0.296944	0.999144	0.567909	0.967687	0.549469	-1.62238	0.610142
pyrrolidinium	C173_A27	0.033	226.48	59.05	6.313	8.75	0.101	0.027	8.75	0.351	24.187	1.915	0.177	0.181	0.292	0	1.089	0	0	0.005	2.801	71.8321	15.6027	0.437384	12.1279	not readily biodegradable	0.0261539	0.917353	0.54697	0.978516	0.549011	-1.45498	0.885044
piperidinium	C285_A55	0.029	254.54	62.01	2.925	9.75	0.099	0	9.75	0.505	27.24	1.924	0.174	0.251	0.013	0	1.064	0	0	0.005	1.214	71.7603	14.9132	1.20356	12.1229	not readily biodegradable	0.310209	0.999144	0.537709	0.967687	0.549183	-1.14827	0.857131
pyridinium	C219_A54	0.029	164.3	162.16	11.879	6.2	0.042	0.311	7	0.146	16.499	1.861	0.206	0.169	0.4	0.091	0.472	1	1	0.008	2.792	81.9007	5.97634	0.00224452	12.1207	not readily biodegradable	0.720153	0.481161	0.602181	0.711276	0.511285	0.15122	1.49825
piperazinium	C872_A64	0.07	171.35	132.08	11.425	6.95	0.081	0.344	7.083	0.074	17.574	1.843	0.208	0.208	0.243	0.131	0.859	0	0	0.009	2.425	76.7281	11.0979	0.0585427	12.1155	not readily biodegradable	0.752686	0.74969	0.666489	0.878896	0.529655	-1.06656	1.617
piperidinium	C272_A27	0.035	212.45	59.05	6.313	8.25	0.099	0.027	8.25	0.312	22.66	1.91	0.186	0.209	0.292	0	1.061	0	0	0.008	2.801	72.662	15.0207	0.211858	12.1054	not readily biodegradable	0.163368	0.857909	0.628783	0.966388	0.545125	-1.37115	1.034
pyrrolidinium	C152_A70	0.033	226.48	120.17	11.655	8.75	0.109	0.092	8.75	0.622	24.187	1.915	0.181	0.238	0.109	0.13	0.998	0	2	0.004	1.852	73.3941	13.5729	0.930163	12.1029	not readily biodegradable	0.360064	0.976526	0.293583	0.939101	0.542154	-1.69771	0.949557
piperidinium	C524_A14	0.031	240.51	58.09	1.345	9.25	0.093	0	9.25	0.274	25.714	1.92	0.177	0.255	0.014	0	1.064	1	0	0.009	1.2517	72.4016	15.0464	0.461227	12.0908	not readily biodegradable	0.434069	0.921	0.763029	0.967687	0.545816	-1.53856	0.759096
piperidinium	C284_A14	0.031	240.51	58.09	1.345	9.25	0.098	0	9.25	0.35	25.714	1.92	0.168	0.217	0.014	0	1.064	1	0	0.005	1.2517	72.2759	15.0203	0.61507	12.0888	not readily biodegradable	0.434069	0.944376	0.64241	0.967687	0.546274	-1.53856	0.759096
piperidinium	C524_A55	0.031	240.51	62.01	2.925	9.25	0.093	0	9.25	0.274	25.714	1.92	0.177	0.255	0.013	0	1.064	0	0	0.009	1.214	72.4102	15.0482	0.461281	12.0803	not readily biodegradable	0.447333	0.921	0.732829	0.967687	0.54553	-1.06444	1.00609
piperidinium	C284_A55	0.031	240.51	62.01	2.925	9.25	0.098	0	9.25	0.35	25.714	1.92	0.168	0.217	0.013	0	1.064	0	0	0.005	1.214	72.2844	15.0221	0.615143	12.0783	not readily biodegradable	0.447333	0.944376	0.61221	0.967687	0.545988	-1.06444	1.00609
piperidinium	C283_A70	0.033	226.48	120.17	11.655	8.75	0.097	0.092	8.75	0.262	24.187	1.915	0.172	0.202	0.109	0.13	1.064	0	2	0.007	1.852	72.432	15.0527	0.458134	12.0571	not readily biodegradable	0.360064	0.920423	0.529685	0.967687	0.544884	-1.69771	0.949557
piperazinium	C864_A54	0.031	143.29	162.16	11.879	5.2	0.084	0.311	5.333	0.072	14.521	1.943	0.19	0.209	0.4	0.091	0.288	1	1	0.008	2.792	83.5364	4.40299	0.00753593	12.0531	not readily biodegradable	0.897893	0.577337	0.63775	0.63158	0.504191	-1.00464	1.93343
imidazolium	C435_A33	0.04	237.46	45.02	2.927	8.4	0.056	0	9.167	0.336	24.155	1.933	0.164	0.225	-0.03	0	1.049	0	0	0.01	1.42	73.1415	14.8024	0.0190335	12.037	not readily biodegradable	0.514941	0.662857	0.724013	0.96119	0.541571	-0.450057	0.776391
pyrrolidinium	C480_A33	0.031	240.51	45.02	2.927	9.25	0.095	0	9.25	0.194	25.714	1.92	0.16	0.196	-0.03	0	1.114	0	0	0.009	1.42	71.2859	16.1837	0.509889	12.0205	not readily biodegradable	0.374851	0.93035	0.771243	0.989344	0.548641	-1.33525	0.820386
piperazinium	C865_A64	0.029	157.32	132.08	11.425	5.7	0.081	0.344	5.833	0.213	16.047	1.948	0.184	0.235	0.243	0.131	0.525	0	0	0.01	2.425	81.4558	6.52775	0.0131732	12.0033	not readily biodegradable	0.8899	0.624457	0.6207	0.734232	0.510081	-0.981255	1.76194
imidazolium	C443_A57	0.038	251.49	96.07	4.388	8.9	0.06	0.517	9.667	0.356	25.681	1.937	0.171	0.205	0.208	0	1.105	0	0	0.009	1.303	71.6314	16.0055	0.373426	11.9898	not readily biodegradable	0.418984	0.904817	0.665451	0.985446	0.546487	-0.394176	0.861701
imidazolium	C436_A69	0.038	251.49	180.15	8.406	8.9	0.059	0.529	9.667	0.407	25.681	1.937	0.166	0.223	0.052	0.125	1.114	0	0	0.01	2.21	71.4451	16.2199	0.369441	11.9656	not readily biodegradable	0.0998514	0.904161	0.585159	0.989344	0.546658	-0.631109	0.998548
pyrrolidinium	C134_A57	0.035	212.45	96.07	4.388	8.25	0.092	0.517	8.25	0.096	22.66	1.91	0.176	0.186	0.208	0	1.061	0	0	0.01	1.303	72.0857	14.9015	1.07028	11.9425	not readily biodegradable	0.690446	0.989305	0.811443	0.966388	0.5435	-0.989306	1.33536
morpholinium	C850_A56	0.061	258.48	90.07	5.196	9.083	0.068	0	9.75	0.363	25.616	1.924	0.169	0.209	0.064	0.116	1.064	0	3	0.005	2.146	72.8405	15.1376	0.0886545	11.9333	not readily biodegradable	0.128211	0.787387	0.562553	0.967687	0.540258	-1.03093	0.446155
piperidinium	C261_A64	0.035	212.45	132.08	11.425	8.25	0.101	0.344	8.25	0.365	22.66	1.91	0.197	0.266	0.243	0.131	1.061	0	0	0.006	2.425	72.2512	14.9358	0.881299	11.9317	not readily biodegradable	0.295665	0.973437	0.463552	0.966388	0.542574	-1.4932	1.19439
imidazolium	C39_A65	0.043	223.43	124.16	12.137	7.9	0.056	0.435	8.667	0.309	22.628	1.929	0.19	0.214	0.403	0.12	0.977	0	1	0.008	1.98	74.6957	13.3101	0.0635362	11.9306	not readily biodegradable	0.455116	0.758464	0.518903	0.930005	0.532944	-0.728402	0.927814
piperazinium	C874_A7	0.06	199.41	149.08	7.722	7.95	0.08	0.609	8.083	0.155	20.628	1.865	0.2	0.277	-0.055	0	0.872	0	0	0.01	2.254	76.2277	11.2819	0.570175	11.9202	not readily biodegradable	0.538425	0.933961	0.719358	0.884527	0.526882	-0.864191	1.59506
imidazolium	C39_A54	0.043	223.43	162.16	11.879	7.9	0.056	0.311	8.667	0.309	22.628	1.929	0.19	0.214	0.4	0.091	0.977	1	1	0.008	2.792	74.7414	13.3183	0.0380048	11.9023	not readily biodegradable	0.16941	0.716931	0.523835	0.930005	0.532088	-0.776099	1.01911
imidazolium	C30_A70	0.043	223.43	120.17	11.655	7.9	0.058	0.092	8.667	0.338	22.628	1.929	0.178	0.235	0.109	0.13	0.968	0	2	0.007	1.852	74.946	13.1439	0.0172462	11.8929	not readily biodegradable	0.500154	0.652929	0.493155	0.926107	0.531075	-0.775644	0.892316
pyrrolidinium	C181_A14	0.035	212.45	58.09	1.345	8.25	0.097	0	8.25	0.128	22.66	1.91	0.176	0.221	0.014	0	0.928	1	0	0.008	1.2517	75.6052	12.3542	0.175521	11.8651	not readily biodegradable	0.708497	0.839515	0.812182	0.908782	0.5279	-1.34476	1.04418
morpholinium	C850_A67	0.061	258.48	197.65	2.652	9.083	0.068	0	9.75	0.363	25.616	1.924	0.169	0.209	0.057	0	1.064	0	0	0.005	0.863	72.9004	15.1501	0.0887274	11.8608	not readily biodegradable	0.579641	0.787387	0.611179	0.967687	0.538261	-1.10335	0.73568
piperidinium	C292_A70	0.033	226.48	120.17	11.655	8.75	0.095	0.092	8.75	0.186	24.187	1.915	0.172	0.197	0.109	0.13	1.064	0	2	0.01	1.852	72.6384	15.0956	0.409187	11.8568	not readily biodegradable	0.360064	0.911072	0.629282	0.967687	0.539203	-1.69771	0.949557
pyrrolidinium	C181_A55	0.035	212.45	62.01	2.925	8.25	0.097	0	8.25	0.128	22.66	1.91	0.176	0.221	0.013	0	0.928	0	0	0.008	1.214	75.6141	12.3557	0.175542	11.8546	not readily biodegradable	0.721762	0.839515	0.781982	0.908782	0.527614	-0.870649	1.29117
piperidinium	C291_A54	0.035	212.45	162.16	11.879	8.25	0.094	0.311	8.25	0.144	22.66	1.91	0.186	0.176	0.4	0.091	1.061	1	1	0.01	2.792	72.6418	15.0165	0.515143	11.8266	not readily biodegradable	0.166535	0.929657	0.645187	0.966388	0.538453	-1.61434	1.22531
imidazolium	C21_A70	0.04	237.46	120.17	11.655	8.4	0.066	0.092	9.167	0.081	24.155	1.933	0.164	0.185	0.109	0.13	1.049	0	2	0.012	1.852	73.2937	14.8332	0.0498581	11.8232	not readily biodegradable	0.36294	0.740424	0.721795	0.96119	0.535792	-0.922483	0.769434
piperazinium	C870_A45	0.082	143.29	74.07	8.231	5.95	0.072	0.039	6.083	0	14.521	1.813	0.209	0.209	-0.012	0.166	0.391	0	1	0.007	5.2808	82.9331	5.24425	0.00306379	11.8196	not readily biodegradable	0.0221971	0.505268	0.721063	0.676193	0.500768	-0.814892	1.76105
piperidinium	C291_A65	0.035	212.45	124.16	12.137	8.25	0.094	0.435	8.25	0.144	22.66	1.91	0.186	0.176	0.403	0.12	1.061	0	1	0.01	1.98	72.3656	14.9594	0.858462	11.8166	not readily biodegradable	0.452241	0.97119	0.640256	0.966388	0.539309	-1.56664	1.13401
piperazinium	C869_A32	0.091	129.26	75.05	7.162	5.45	0.079	0.022	5.583	0	12.994	1.793	0.219	0.242	-0.094	0.186	0.298	0	0	0.005	5.3729	83.6935	4.48996	0.00232359	11.8142	not readily biodegradable	0.127005	0.482208	0.699451	0.635912	0.498113	-0.647593	1.94962
morpholinium	C848_A57	0.067	230.42	96.07	4.388	8.083	0.063	0.517	8.75	0.199	22.563	1.915	0.172	0.166	0.208	0	1.012	0	0	0.007	1.303	74.0113	14.03	0.166531	11.7921	not readily biodegradable	0.699163	0.836991	0.698869	0.945165	0.532235	-0.313604	0.9622
imidazolium	C9_A63	0.043	223.43	87.06	8.284	7.9	0.071	0.482	8.667	0.577	22.628	1.929	0.19	0.25	0.245	0.152	0.976	0	0	0.005	1.495	74.7526	13.2967	0.184222	11.7664	not readily biodegradable	0.625766	0.844336	0.400669	0.929572	0.528754	-0.565479	0.896383
pyrrolidinium	C182_A33	0.033	226.48	45.02	2.927	8.75	0.099	0	8.75	0.381	24.187	1.915	0.162	0.181	-0.03	0	0.983	0	0	0.008	1.42	74.4635	13.4102	0.361017	11.7652	not readily biodegradable	0.512065	0.898959	0.660338	0.932604	0.529835	-1.22528	0.956515
imidazolium	C9_A64	0.043	223.43	132.08	11.425	7.9	0.071	0.344	8.667	0.577	22.628	1.929	0.19	0.25	0.243	0.131	0.976	0	0	0.005	2.425	74.8303	13.3106	0.10402	11.7551	not readily biodegradable	0.298541	0.798114	0.340631	0.929572	0.528183	-0.65496	0.988196
morpholinium	C850_A69	0.061	258.48	180.15	8.406	9.083	0.068	0.529	9.75	0.363	25.616	1.924	0.169	0.209	0.052	0.125	1.064	0	0	0.005	2.21	72.4299	15.0523	0.791597	11.7261	not readily biodegradable	0.105692	0.964572	0.501196	0.967687	0.536834	-0.795129	0.835599
morpholinium	C849_A68	0.064	244.45	153.11	17.981	8.583	0.065	0.463	9.25	0.262	24.09	1.92	0.228	0.257	0.833	0.091	1.064	0	0	0.006	2.518	72.8754	15.1449	0.273701	11.706	not readily biodegradable	0.134445	0.878347	0.387746	0.967687	0.534572	-1.16352	0.631652
piperazinium	C873_A66	0.065	185.38	135.11	14.945	7.45	0.078	0.139	7.583	0.111	19.101	1.855	0.174	0.174	-0.172	0.133	0.865	0	0	0.009	2.622	77.0144	11.2581	0.0392393	11.6883	not readily biodegradable	0.546157	0.717093	0.581422	0.881495	0.518381	-1.24604	1.44502
piperidinium	C285_A33	0.029	254.54	45.02	2.927	9.75	0.099	0	9.75	0.505	27.24	1.924	0.174	0.251	-0.03	0	1.064	0	0	0.005	1.42	72.1225	14.9884	1.20964	11.6795	not readily biodegradable	0.237727	0.999144	0.53767	0.967687	0.536911	-1.41908	0.671431
pyrrolidinium	C152_A56	0.033	226.48	90.07	5.196	8.75	0.109	0	8.75	0.622	24.187	1.915	0.181	0.238	0.064	0.116	0.998	0	3	0.004	2.146	74.0031	13.6855	0.640272	11.6711	not readily biodegradable	0.256619	0.945711	0.417041	0.939101	0.529311	-1.54587	0.933806
pyrrolidinium	C151_A54	0.035	212.45	162.16	11.879	8.25	0.108	0.311	8.25	0.515	22.66	1.91	0.197	0.209	0.4	0.091	0.88	1	1	0.005	2.792	75.7509	11.371	1.20857	11.6696	not readily biodegradable	0.166535	0.995111	0.361753	0.887992	0.522617	-1.61434	1.22531
imidazolium	C434_A4	0.043	223.43	125.14	10.406	7.9	0.053	0.416	8.667	0.296	22.628	1.929	0.201	0.214	0.562	0.13	0.97	0	0	0.01	2	75.0749	13.2132	0.0496047	11.6624	not readily biodegradable	0.448079	0.738075	0.600283	0.926973	0.524992	-0.674699	0.957412
piperidinium	C524_A33	0.031	240.51	45.02	2.927	9.25	0.093	0	9.25	0.274	25.714	1.92	0.177	0.255	-0.03	0	1.064	0	0	0.009	1.42	72.7756	15.1242	0.463609	11.6366	not readily biodegradable	0.374851	0.921	0.732791	0.967687	0.533258	-1.33525	0.820386
piperidinium	C284_A33	0.031	240.51	45.02	2.927	9.25	0.098	0	9.25	0.35	25.714	1.92	0.168	0.217	-0.03	0	1.064	0	0	0.005	1.42	72.649	15.0978	0.618245	11.6349	not readily biodegradable	0.374851	0.944376	0.612172	0.967687	0.533716	-1.33525	0.820386
pyrrolidinium	C171_A24	0.038	198.42	152.03	12.595	7.75	0.099	0.531	7.75	0.103	21.133	1.903	0.156	0.18	-0.242	0.159	0.811	0	0	0.009	2.718	77.147	10.2506	0.97896	11.6234	not readily biodegradable	0.329786	0.976628	0.630186	0.858106	0.516324	-0.990386	1.63253
piperazinium	C870_A8	0.082	143.29	66.05	4.324	5.95	0.072	0	6.083	0	14.521	1.813	0.209	0.209	-0.031	0.131	0.391	2	0	0.007	5.1256	83.1242	5.25634	0.00261204	11.6169	not readily biodegradable	0.076805	0.492206	0.795742	0.676193	0.495346	-0.718316	1.78468
imidazolium	C66_A65	0.04	237.46	124.16	12.137	8.4	0.057	0.435	9.167	0.304	24.155	1.933	0.185	0.195	0.403	0.12	1.038	0	1	0.01	1.98	73.6466	14.6176	0.123461	11.6124	not readily biodegradable	0.317902	0.813233	0.563352	0.956426	0.52925	-0.875242	0.804933
piperidinium	C283_A56	0.033	226.48	90.07	5.196	8.75	0.097	0	8.75	0.262	24.187	1.915	0.172	0.202	0.064	0.116	1.064	0	3	0.007	2.146	72.9204	15.1542	0.314867	11.6105	not readily biodegradable	0.256619	0.889608	0.653144	0.967687	0.532041	-1.54587	0.933806
imidazolium	C436_A55	0.038	251.49	62.01	2.925	8.9	0.059	0	9.667	0.407	25.681	1.937	0.166	0.223	0.013	0	1.114	0	0	0.01	1.214	72.0064	16.3473	0.0414653	11.6048	not readily biodegradable	0.450299	0.726975	0.689924	0.989344	0.535527	-0.275519	0.817513
imidazolium	C32_A69	0.038	251.49	180.15	8.406	8.9	0.064	0.529	9.667	0.522	25.681	1.937	0.171	0.235	0.052	0.125	1.104	0	0	0.005	2.21	71.8694	16.0303	0.496457	11.6038	not readily biodegradable	0.0998514	0.927537	0.424772	0.985012	0.536051	-0.631109	0.998548
pyrrolidinium	C152_A67	0.033	226.48	197.65	2.652	8.75	0.109	0	8.75	0.622	24.187	1.915	0.181	0.238	0.057	0	0.998	0	0	0.004	0.863	74.0633	13.6966	0.640792	11.5993	not readily biodegradable	0.708049	0.945711	0.465668	0.939101	0.527313	-1.61829	1.22333
piperazinium	C871_A7	0.076	157.32	149.08	7.722	6.45	0.075	0.609	6.583	0.01	16.047	1.829	0.2	0.208	-0.055	0	0.676	0	0	0.012	2.254	79.9648	8.36908	0.0695872	11.5965	not readily biodegradable	0.950067	0.760305	0.831097	0.799634	0.505606	-0.571396	2.01664
imidazolium	C66_A54	0.04	237.46	162.16	11.879	8.4	0.057	0.311	9.167	0.304	24.155	1.933	0.185	0.195	0.4	0.091	1.038	1	1	0.01	2.792	73.7088	14.6299	0.0738668	11.5875	not readily biodegradable	0.0321961	0.771699	0.568283	0.956426	0.528393	-0.922939	0.896232
piperidinium	C282_A70	0.035	212.45	120.17	11.655	8.25	0.096	0.092	8.25	0.171	22.66	1.91	0.176	0.197	0.109	0.13	1.038	0	2	0.009	1.852	73.6084	14.61	0.236231	11.5454	not readily biodegradable	0.497278	0.865655	0.615469	0.956426	0.527744	-1.61388	1.09851
piperidinium	C283_A67	0.033	226.48	197.65	2.652	8.75	0.097	0	8.75	0.262	24.187	1.915	0.172	0.202	0.057	0	1.064	0	0	0.007	0.863	72.9793	15.1665	0.315121	11.5391	not readily biodegradable	0.708049	0.889608	0.70177	0.967687	0.530043	-1.61829	1.22333
piperidinium	C272_A64	0.035	212.45	132.08	11.425	8.25	0.099	0.344	8.25	0.312	22.66	1.91	0.186	0.209	0.243	0.131	1.061	0	0	0.008	2.425	72.6583	15.0199	0.789328	11.5324	not readily biodegradable	0.295665	0.964086	0.531071	0.966388	0.53114	-1.4932	1.19439
piperazinium	C875_A62	0.057	213.44	121.12	10.465	8.45	0.082	0	8.583	0.243	22.155	1.873	0.199	0.188	0.308	0.085	0.97	0	0	0.008	2.513	75.1483	13.2261	0.0937999	11.5318	not readily biodegradable	0.310081	0.789423	0.582586	0.926973	0.521513	-1.4944	1.06951
imidazolium	C434_A28	0.043	223.43	171.21	14.741	7.9	0.053	0.297	8.667	0.296	22.628	1.929	0.201	0.214	0.547	0.09	0.97	0	0	0.01	3.092	75.2206	13.2388	0.0303338	11.5103	not readily biodegradable	0.0638536	0.698216	0.517423	0.926973	0.520711	-0.939339	0.965534
piperidinium	C263_A70	0.031	240.51	120.17	11.655	9.25	0.103	0.092	9.25	0.583	25.714	1.92	0.173	0.201	0.109	0.13	1.064	0	2	0.004	1.852	72.3015	15.0256	1.204	11.4688	not readily biodegradable	0.22285	0.998567	0.312328	0.967687	0.530966	-1.80768	0.813428
imidazolium	C30_A56	0.043	223.43	90.07	5.196	7.9	0.058	0	8.667	0.338	22.628	1.929	0.178	0.235	0.064	0.116	0.968	0	3	0.007	2.146	75.3453	13.2139	0.0118363	11.4289	not readily biodegradable	0.396708	0.622114	0.616614	0.926107	0.518232	-0.623801	0.876564
morpholinium	C850_A14	0.061	258.48	58.09	1.345	9.083	0.068	0	9.75	0.363	25.616	1.924	0.169	0.209	0.014	0	1.064	1	0	0.005	1.2517	73.2642	15.2257	0.0891702	11.421	not readily biodegradable	0.442875	0.787387	0.636162	0.967687	0.525988	-0.913654	0.407575
piperidinium	C292_A56	0.033	226.48	90.07	5.196	8.75	0.095	0	8.75	0.186	24.187	1.915	0.172	0.197	0.064	0.116	1.064	0	3	0.01	2.146	73.1125	15.1942	0.281167	11.4122	not readily biodegradable	0.256619	0.880257	0.75274	0.967687	0.52636	-1.54587	0.933806
morpholinium	C850_A55	0.061	258.48	62.01	2.925	9.083	0.068	0	9.75	0.363	25.616	1.924	0.169	0.209	0.013	0	1.064	0	0	0.005	1.214	73.2726	15.2274	0.0891804	11.4108	not readily biodegradable	0.45614	0.787387	0.605961	0.967687	0.525703	-0.439539	0.654565
pyrrolidinium	C181_A33	0.035	212.45	45.02	2.927	8.25	0.097	0	8.25	0.128	22.66	1.91	0.176	0.221	-0.03	0	0.928	0	0	0.008	1.42	75.9954	12.418	0.176427	11.4102	not readily biodegradable	0.649279	0.839515	0.781944	0.908782	0.515342	-1.14146	1.10547
imidazolium	C9_A57	0.043	223.43	96.07	4.388	7.9	0.071	0.517	8.667	0.577	22.628	1.929	0.19	0.25	0.208	0	0.976	0	0	0.005	1.303	75.0529	13.3502	0.213871	11.3831	not readily biodegradable	0.693322	0.856059	0.475138	0.929572	0.518194	-0.151066	1.12916
piperazinium	C875_A27	0.057	213.44	59.05	6.313	8.45	0.082	0.027	8.583	0.243	22.155	1.873	0.199	0.188	0.292	0	0.97	0	0	0.008	2.801	75.2788	13.2491	0.105102	11.367	not readily biodegradable	0.208746	0.798467	0.661948	0.926973	0.516947	-1.21117	1.02221
imidazolium	C21_A56	0.04	237.46	90.07	5.196	8.4	0.066	0	9.167	0.081	24.155	1.933	0.164	0.185	0.064	0.116	1.049	0	3	0.012	2.146	73.6878	14.913	0.0342201	11.365	not readily biodegradable	0.259494	0.709609	0.845254	0.96119	0.522949	-0.770641	0.753683
imidazolium	C30_A67	0.043	223.43	197.65	2.652	7.9	0.058	0	8.667	0.338	22.628	1.929	0.178	0.235	0.057	0	0.968	0	0	0.007	0.863	75.406	13.2246	0.0118459	11.3575	not readily biodegradable	0.848138	0.622114	0.665241	0.926107	0.516234	-0.69622	1.16609
piperazinium	C863_A28	0.034	129.26	171.21	14.741	4.7	0.085	0.297	4.833	0	12.994	1.937	0.208	0.219	0.547	0.09	0.002	0	0	0.006	3.092	85.9223	2.73141	0.0041667	11.3421	not readily biodegradable	0.929551	0.52723	0.575607	0.507706	0.479759	-1.08257	2.02479
piperidinium	C292_A67	0.033	226.48	197.65	2.652	8.75	0.095	0	8.75	0.186	24.187	1.915	0.172	0.197	0.057	0	1.064	0	0	0.01	0.863	73.1708	15.2063	0.281391	11.3415	not readily biodegradable	0.708049	0.880257	0.801367	0.967687	0.524362	-1.61829	1.22333
piperazinium	C866_A62	0.027	171.35	121.12	10.465	6.2	0.085	0	6.333	0.309	17.574	1.953	0.179	0.193	0.308	0.085	0.668	0	0	0.008	2.513	80.3868	8.2951	0.00731437	11.3108	not readily biodegradable	0.721723	0.578031	0.550862	0.796169	0.497218	-1.22775	1.50391
pyridinium	C219_A52	0.029	164.3	114.89	7.848	6.2	0.042	1.55	7	0.146	16.499	1.861	0.206	0.169	0.328	0.127	0.472	0	0	0.008	2.673	82.2989	6.00539	0.385396	11.3103	not readily biodegradable	0.762024	0.896157	0.679231	0.711276	0.490736	0.19072	1.37484
imidazolium	C30_A69	0.043	223.43	180.15	8.406	7.9	0.058	0.529	8.667	0.338	22.628	1.929	0.178	0.235	0.052	0.125	0.968	0	0	0.007	2.21	75.378	13.2197	0.106332	11.296	not readily biodegradable	0.37419	0.7993	0.555257	0.926107	0.514807	-0.387999	1.26601
imidazolium	C21_A67	0.04	237.46	197.65	2.652	8.4	0.066	0	9.167	0.081	24.155	1.933	0.164	0.185	0.057	0	1.049	0	0	0.012	0.863	73.7466	14.9249	0.0342473	11.2943	not readily biodegradable	0.710924	0.709609	0.89388	0.96119	0.520951	-0.843059	1.04321
piperazinium	C875_A49	0.057	213.44	95.11	7.497	8.45	0.082	0.538	8.583	0.243	22.155	1.873	0.199	0.188	0.291	0	0.97	0	0	0.008	1.258	74.7116	13.1492	0.869255	11.27	not readily biodegradable	0.751658	0.969623	0.639317	0.926973	0.516661	-1.22018	1.12683
imidazolium	C32_A55	0.038	251.49	62.01	2.925	8.9	0.064	0	9.667	0.522	25.681	1.937	0.171	0.235	0.013	0	1.104	0	0	0.005	1.214	72.51	16.1732	0.0557798	11.2611	not readily biodegradable	0.450299	0.750352	0.529538	0.985012	0.52492	-0.275519	0.817513
piperazinium	C875_A53	0.057	213.44	111.11	8.56	8.45	0.082	0.455	8.583	0.243	22.155	1.873	0.199	0.188	0.286	0.163	0.97	0	0	0.008	1.673	74.944	13.1901	0.617917	11.248	not readily biodegradable	0.605639	0.941823	0.618998	0.926973	0.515234	-1.20813	1.1812
piperidinium	C273_A62	0.033	226.48	121.12	10.465	8.75	0.1	0	8.75	0.322	24.187	1.915	0.197	0.238	0.308	0.085	1.064	0	0	0.005	2.513	73.1884	15.2099	0.375993	11.2257	not readily biodegradable	0.127488	0.903634	0.481547	0.967687	0.521377	-1.73821	0.932345
imidazolium	C21_A69	0.04	237.46	180.15	8.406	8.4	0.066	0.529	9.167	0.081	24.155	1.933	0.164	0.185	0.052	0.125	1.049	0	0	0.012	2.21	73.5872	14.8926	0.306864	11.2133	not readily biodegradable	0.236976	0.886795	0.783897	0.96119	0.519524	-0.534838	1.14313
piperidinium	C274_A70	0.031	240.51	120.17	11.655	9.25	0.101	0.092	9.25	0.525	25.714	1.92	0.206	0.335	0.109	0.13	1.064	0	2	0.005	1.852	72.6199	15.0918	1.07703	11.2113	not readily biodegradable	0.22285	0.989217	0.361228	0.967687	0.523227	-1.80768	0.813428
pyrrolidinium	C152_A14	0.033	226.48	58.09	1.345	8.75	0.109	0	8.75	0.622	24.187	1.915	0.181	0.238	0.014	0	0.998	1	0	0.004	1.2517	74.4288	13.7642	0.643955	11.163	not readily biodegradable	0.571283	0.945711	0.49065	0.939101	0.51504	-1.42859	0.895225
pyrrolidinium	C152_A55	0.033	226.48	62.01	2.925	8.75	0.109	0	8.75	0.622	24.187	1.915	0.181	0.238	0.013	0	0.998	0	0	0.004	1.214	74.4372	13.7658	0.644028	11.153	not readily biodegradable	0.584548	0.945711	0.46045	0.939101	0.514755	-0.954475	1.14222
pyridinium	C219_A62	0.029	164.3	121.12	10.465	6.2	0.042	0	7	0.146	16.499	1.861	0.206	0.169	0.308	0.085	0.472	0	0	0.008	2.513	82.8111	6.04277	0.000624456	11.1456	not readily biodegradable	0.818321	0.376994	0.629209	0.711276	0.485028	0.111176	1.35424
piperazinium	C866_A27	0.027	171.35	59.05	6.313	6.2	0.085	0.027	6.333	0.309	17.574	1.953	0.179	0.193	0.292	0	0.668	0	0	0.008	2.801	80.5358	8.31047	0.00819663	11.1455	not readily biodegradable	0.620389	0.587074	0.630225	0.796169	0.492651	-0.944512	1.45661
piperazinium	C872_A31	0.07	171.35	96.1	6.665	6.95	0.081	0.498	7.083	0.074	17.574	1.843	0.208	0.208	0.15	0	0.859	0	0	0.009	4.5554	77.5306	11.214	0.112073	11.1433	not readily biodegradable	0.00309443	0.801271	0.757472	0.878896	0.503113	-0.845631	1.61773
piperazinium	C864_A52	0.031	143.29	114.89	7.848	5.2	0.084	1.55	5.333	0.072	14.521	1.943	0.19	0.209	0.328	0.127	0.288	0	0	0.008	2.673	83.1927	4.38488	1.2824	11.1401	not readily biodegradable	0.939764	0.992333	0.714799	0.63158	0.483642	-0.965143	1.81002
piperazinium	C866_A15	0.027	171.35	95.11	7.497	6.2	0.085	0.538	6.333	0.309	17.574	1.953	0.179	0.193	0.291	0	0.668	0	0	0.008	4.4469	80.4967	8.30644	0.0682726	11.1285	not readily biodegradable	0.0412707	0.758231	0.607593	0.796169	0.492366	-0.953522	1.56123
piperidinium	C283_A14	0.033	226.48	58.09	1.345	8.75	0.097	0	8.75	0.262	24.187	1.915	0.172	0.202	0.014	0	1.064	1	0	0.007	1.2517	73.3365	15.2407	0.316664	11.1061	not readily biodegradable	0.571283	0.889608	0.726752	0.967687	0.517771	-1.42859	0.895225
piperidinium	C282_A56	0.035	212.45	90.07	5.196	8.25	0.096	0	8.25	0.171	22.66	1.91	0.176	0.197	0.064	0.116	1.038	0	3	0.009	2.146	74.0422	14.6961	0.16222	11.0995	not readily biodegradable	0.393833	0.83484	0.738928	0.956426	0.5149	-1.46204	1.08276
piperidinium	C283_A55	0.033	226.48	62.01	2.925	8.75	0.097	0	8.75	0.262	24.187	1.915	0.172	0.202	0.013	0	1.064	0	0	0.007	1.214	73.3447	15.2424	0.316699	11.0961	not readily biodegradable	0.584548	0.889608	0.696552	0.967687	0.517485	-0.954475	1.14222
piperazinium	C864_A62	0.031	143.29	121.12	10.465	5.2	0.084	0	5.333	0.072	14.521	1.943	0.19	0.209	0.308	0.085	0.288	0	0	0.008	2.513	84.4702	4.45222	0.00209673	11.0754	not readily biodegradable	0.996061	0.47317	0.664777	0.63158	0.477934	-1.04469	1.78942
piperidinium	C263_A56	0.031	240.51	90.07	5.196	9.25	0.103	0	9.25	0.583	25.714	1.92	0.173	0.201	0.064	0.116	1.064	0	3	0.004	2.146	72.9493	15.1602	0.82931	11.0612	not readily biodegradable	0.119405	0.967753	0.435787	0.967687	0.518122	-1.65583	0.797677
piperidinium	C273_A27	0.033	226.48	59.05	6.313	8.75	0.1	0.027	8.75	0.322	24.187	1.915	0.197	0.238	0.292	0	1.064	0	0	0.005	2.801	73.2874	15.2305	0.421134	11.061	not readily biodegradable	0.0261539	0.912677	0.560909	0.967687	0.51681	-1.45498	0.885044
pyrrolidinium	C134_A70	0.035	212.45	120.17	11.655	8.25	0.092	0.092	8.25	0.096	22.66	1.91	0.176	0.186	0.109	0.13	1.061	0	2	0.01	1.852	73.5642	15.2072	0.187268	11.0413	not readily biodegradable	0.497278	0.846954	0.67254	0.966388	0.515245	-1.61388	1.09851
piperidinium	C282_A67	0.035	212.45	197.65	2.652	8.25	0.096	0	8.25	0.171	22.66	1.91	0.176	0.197	0.057	0	1.038	0	0	0.009	0.863	74.1004	14.7076	0.162347	11.0297	not readily biodegradable	0.845263	0.83484	0.787554	0.956426	0.512903	-1.53446	1.37229
pyrrolidinium	C172_A4	0.035	212.45	125.14	10.406	8.25	0.1	0.416	8.25	0.177	22.66	1.91	0.209	0.209	0.562	0.13	0.969	0	0	0.007	2	74.6894	13.1221	1.15912	11.0294	not readily biodegradable	0.445204	0.992878	0.594414	0.92654	0.510673	-1.51294	1.16361
piperazinium	C865_A31	0.029	157.32	96.1	6.665	5.7	0.081	0.498	5.833	0.213	16.047	1.948	0.184	0.235	0.15	0	0.525	0	0	0.01	4.5554	82.3519	6.59956	0.0252319	11.0233	not readily biodegradable	0.140308	0.676039	0.711684	0.734232	0.483538	-0.760323	1.76267
piperazinium	C863_A71	0.034	129.26	164.2	20.105	4.7	0.085	0.587	4.833	0	12.994	1.937	0.208	0.219	0.516	0.112	0.002	0	2	0.006	3.451	86.23	2.7412	0.0139292	11.0149	not readily biodegradable	0.803235	0.624364	0.473078	0.507706	0.470912	-1.12097	1.98454
piperidinium	C263_A67	0.031	240.51	197.65	2.652	9.25	0.103	0	9.25	0.583	25.714	1.92	0.173	0.201	0.057	0	1.064	0	0	0.004	0.863	73.0062	15.1721	0.829957	10.9918	not readily biodegradable	0.570835	0.967753	0.484414	0.967687	0.516125	-1.72825	1.0872
pyridinium	C219_A27	0.029	164.3	59.05	6.313	6.2	0.042	0.027	7	0.146	16.499	1.861	0.206	0.169	0.292	0	0.472	0	0	0.008	2.801	82.9651	6.05401	0.000699782	10.9802	not readily biodegradable	0.716986	0.386037	0.708571	0.711276	0.480461	0.39441	1.30693
morpholinium	C850_A33	0.061	258.48	45.02	2.927	9.083	0.068	0	9.75	0.363	25.616	1.924	0.169	0.209	-0.03	0	1.064	0	0	0.005	1.42	73.6288	15.3015	0.0896141	10.9801	not readily biodegradable	0.383658	0.787387	0.605923	0.967687	0.51343	-0.710347	0.468864
pyridinium	C219_A15	0.029	164.3	95.11	7.497	6.2	0.042	0.538	7	0.146	16.499	1.861	0.206	0.169	0.291	0	0.472	0	0	0.008	4.4469	82.9704	6.0544	0.00583193	10.9693	not readily biodegradable	0.137869	0.557194	0.68594	0.711276	0.480176	0.3854	1.41155
imidazolium	C39_A62	0.043	223.43	121.12	10.465	7.9	0.056	0	8.667	0.309	22.628	1.929	0.19	0.214	0.308	0.085	0.977	0	0	0.008	2.513	75.5591	13.464	0.0105716	10.9664	not readily biodegradable	0.267578	0.612764	0.550862	0.930005	0.50583	-0.816144	0.875104
piperazinium	C873_A24	0.065	185.38	152.03	12.595	7.45	0.078	0.531	7.583	0.111	19.101	1.855	0.174	0.174	-0.242	0.159	0.865	0	0	0.009	2.718	77.5145	11.3312	0.20087	10.9534	not readily biodegradable	0.512378	0.848391	0.626341	0.881495	0.498402	-0.720437	1.75687
piperidinium	C291_A62	0.035	212.45	121.12	10.465	8.25	0.094	0	8.25	0.144	22.66	1.91	0.186	0.176	0.308	0.085	1.061	0	0	0.01	2.513	73.6841	15.232	0.143778	10.9401	not readily biodegradable	0.264702	0.825489	0.672215	0.966388	0.512195	-1.65438	1.0813
pyrrolidinium	C172_A28	0.035	212.45	171.21	14.741	8.25	0.1	0.297	8.25	0.177	22.66	1.91	0.209	0.209	0.547	0.09	0.969	0	0	0.007	3.092	75.1547	13.2038	0.711848	10.9297	not readily biodegradable	0.0609782	0.953019	0.511554	0.92654	0.506392	-1.77758	1.17173
imidazolium	C30_A14	0.043	223.43	58.09	1.345	7.9	0.058	0	8.667	0.338	22.628	1.929	0.178	0.235	0.014	0	0.968	1	0	0.007	1.2517	75.7747	13.2892	0.0119038	10.9242	not readily biodegradable	0.711372	0.622114	0.690223	0.926107	0.503962	-0.506524	0.837984
imidazolium	C30_A55	0.043	223.43	62.01	2.925	7.9	0.058	0	8.667	0.338	22.628	1.929	0.178	0.235	0.013	0	0.968	0	0	0.007	1.214	75.7831	13.2907	0.0119051	10.9142	not readily biodegradable	0.724637	0.622114	0.660022	0.926107	0.503676	-0.0324089	1.08497
piperidinium	C292_A14	0.033	226.48	58.09	1.345	8.75	0.095	0	8.75	0.186	24.187	1.915	0.172	0.197	0.014	0	1.064	1	0	0.01	1.2517	73.525	15.2799	0.282753	10.9124	not readily biodegradable	0.571283	0.880257	0.826349	0.967687	0.512089	-1.42859	0.895225
piperazinium	C864_A27	0.031	143.29	59.05	6.313	5.2	0.084	0.027	5.333	0.072	14.521	1.943	0.19	0.209	0.292	0	0.288	0	0	0.008	2.801	84.6276	4.46051	0.00234966	10.9096	not readily biodegradable	0.894727	0.482213	0.744139	0.63158	0.473367	-0.761452	1.74212
piperidinium	C292_A55	0.033	226.48	62.01	2.925	8.75	0.095	0	8.75	0.186	24.187	1.915	0.172	0.197	0.013	0	1.064	0	0	0.01	1.214	73.5331	15.2816	0.282784	10.9025	not readily biodegradable	0.584548	0.880257	0.796149	0.967687	0.511804	-0.954475	1.14222
piperazinium	C864_A15	0.031	143.29	95.11	7.497	5.2	0.084	0.538	5.333	0.072	14.521	1.943	0.19	0.209	0.291	0	0.288	0	0	0.008	4.4469	84.6228	4.46026	0.0195795	10.8974	not readily biodegradable	0.315609	0.65337	0.721508	0.63158	0.473082	-0.770463	1.84673
piperazinium	C872_A79	0.07	171.35	200.73	4.223	6.95	0.081	0.575	7.083	0.074	17.574	1.843	0.208	0.208	0.124	0	0.859	0	0	0.009	3.5528	77.7268	11.2423	0.15465	10.8762	not readily biodegradable	0.355864	0.827062	0.804149	0.878896	0.495692	-1.0532	1.8313
imidazolium	C436_A7	0.038	251.49	149.08	7.722	8.9	0.059	0.609	9.667	0.407	25.681	1.937	0.166	0.223	-0.055	0	1.114	0	0	0.01	2.254	72.2131	16.3942	0.520413	10.8722	not readily biodegradable	0.0843698	0.930956	0.598234	0.989344	0.516119	-0.488211	0.975426
imidazolium	C21_A14	0.04	237.46	58.09	1.345	8.4	0.066	0	9.167	0.081	24.155	1.933	0.164	0.185	0.014	0	1.049	1	0	0.012	1.2517	74.1033	14.997	0.034413	10.8653	not readily biodegradable	0.574158	0.709609	0.918862	0.96119	0.508679	-0.653363	0.715102
imidazolium	C21_A55	0.04	237.46	62.01	2.925	8.4	0.066	0	9.167	0.081	24.155	1.933	0.164	0.185	0.013	0	1.049	0	0	0.012	1.214	74.1115	14.9987	0.0344168	10.8554	not readily biodegradable	0.587423	0.709609	0.888662	0.96119	0.508393	-0.179248	0.962092
piperazinium	C875_A64	0.057	213.44	132.08	11.425	8.45	0.082	0.344	8.583	0.243	22.155	1.873	0.199	0.188	0.243	0.131	0.97	0	0	0.008	2.425	75.4802	13.2845	0.392649	10.8427	not readily biodegradable	0.341044	0.904644	0.564236	0.926973	0.502962	-1.33322	1.1826
pyrrolidinium	C151_A62	0.035	212.45	121.12	10.465	8.25	0.108	0	8.25	0.515	22.66	1.91	0.197	0.209	0.308	0.085	0.88	0	0	0.005	2.513	77.2339	11.5936	0.339054	10.8334	not readily biodegradable	0.264702	0.890943	0.388781	0.887992	0.49636	-1.65438	1.0813
pyrrolidinium	C479_A66	0.033	226.48	135.11	14.945	8.75	0.094	0.139	8.75	0.304	24.187	1.915	0.162	0.202	-0.172	0.133	1.096	0	0	0.012	2.622	72.708	15.9896	0.469764	10.8326	not readily biodegradable	0.0891359	0.922139	0.551724	0.981547	0.513168	-1.65898	1.01396
piperazinium	C875_A63	0.057	213.44	87.06	8.284	8.45	0.082	0.482	8.583	0.243	22.155	1.873	0.199	0.188	0.245	0.152	0.97	0	0	0.008	1.495	75.2351	13.2414	0.693853	10.8297	not readily biodegradable	0.668269	0.950866	0.624274	0.926973	0.503533	-1.24374	1.09079
imidazolium	C39_A27	0.043	223.43	59.05	6.313	7.9	0.056	0.027	8.667	0.309	22.628	1.929	0.19	0.214	0.292	0	0.977	0	0	0.008	2.801	75.6932	13.4879	0.0118458	10.8071	not readily biodegradable	0.166243	0.621807	0.630225	0.930005	0.501264	-0.53291	0.827802
piperidinium	C274_A56	0.031	240.51	90.07	5.196	9.25	0.101	0	9.25	0.525	25.714	1.92	0.206	0.335	0.064	0.116	1.064	0	3	0.005	2.146	73.2353	15.2197	0.741499	10.8036	not readily biodegradable	0.119405	0.958402	0.484687	0.967687	0.510384	-1.65583	0.797677
imidazolium	C39_A49	0.043	223.43	95.11	7.497	7.9	0.056	0.538	8.667	0.309	22.628	1.929	0.19	0.214	0.291	0	0.977	0	0	0.008	1.258	75.6359	13.4777	0.0986414	10.7878	not readily biodegradable	0.709155	0.792964	0.607593	0.930005	0.500978	-0.54192	0.932419
pyrrolidinium	C183_A70	0.031	240.51	120.17	11.655	9.25	0.1	0.092	9.25	0.334	25.714	1.92	0.173	0.186	0.109	0.13	1.102	0	2	0.006	1.852	72.1686	16.0402	1.01011	10.7811	not readily biodegradable	0.22285	0.984542	0.474055	0.984146	0.513922	-1.80768	0.813428
piperidinium	C291_A27	0.035	212.45	59.05	6.313	8.25	0.094	0.027	8.25	0.144	22.66	1.91	0.186	0.176	0.292	0	1.061	0	0	0.01	2.801	73.802	15.2563	0.16108	10.7806	not readily biodegradable	0.163368	0.834533	0.751577	0.966388	0.507629	-1.37115	1.034
piperazinium	C874_A66	0.06	199.41	135.11	14.945	7.95	0.08	0.139	8.083	0.155	20.628	1.865	0.2	0.277	-0.172	0.133	0.872	0	0	0.01	2.622	77.647	11.4919	0.0826189	10.7785	not readily biodegradable	0.408943	0.776537	0.581296	0.884527	0.493489	-1.356	1.30889
piperazinium	C865_A79	0.029	157.32	200.73	4.223	5.7	0.081	0.575	5.833	0.213	16.047	1.948	0.184	0.235	0.124	0	0.525	0	0	0.01	3.5528	82.5902	6.61865	0.0348304	10.7563	not readily biodegradable	0.493078	0.70183	0.758361	0.734232	0.476117	-0.967892	1.97624
imidazolium	C39_A53	0.043	223.43	111.11	8.56	7.9	0.056	0.455	8.667	0.309	22.628	1.929	0.19	0.214	0.286	0.163	0.977	0	0	0.008	1.673	75.6996	13.489	0.0699614	10.7414	not readily biodegradable	0.563136	0.765163	0.587275	0.930005	0.499551	-0.529869	0.986797
piperazinium	C872_A70	0.07	171.35	120.17	11.655	6.95	0.081	0.092	7.083	0.074	17.574	1.843	0.208	0.208	0.109	0.13	0.859	0	2	0.009	1.852	77.962	11.2764	0.0209073	10.7407	not readily biodegradable	0.954299	0.665284	0.662092	0.878896	0.491411	-1.18725	1.52112
piperidinium	C274_A67	0.031	240.51	197.65	2.652	9.25	0.101	0	9.25	0.525	25.714	1.92	0.206	0.335	0.057	0	1.064	0	0	0.005	0.863	73.2915	15.2314	0.742068	10.735	not readily biodegradable	0.570835	0.958402	0.533314	0.967687	0.508386	-1.72825	1.0872
piperazinium	C865_A12	0.029	157.32	97.08	5.555	5.7	0.081	0.493	5.833	0.213	16.047	1.948	0.184	0.235	0.121	0	0.525	0	0	0.01	4.6173	82.6267	6.62158	0.0247963	10.7269	not readily biodegradable	0.118529	0.674364	0.732901	0.734232	0.475261	-0.612328	1.83903
pyrrolidinium	C152_A33	0.033	226.48	45.02	2.927	8.75	0.109	0	8.75	0.622	24.187	1.915	0.181	0.238	-0.03	0	0.998	0	0	0.004	1.42	74.7951	13.832	0.647124	10.7258	not readily biodegradable	0.512065	0.945711	0.460412	0.939101	0.502482	-1.22528	0.956515
imidazolium	C66_A62	0.04	237.46	121.12	10.465	8.4	0.057	0	9.167	0.304	24.155	1.933	0.185	0.195	0.308	0.085	1.038	0	0	0.01	2.513	74.5166	14.7903	0.0205476	10.6726	not readily biodegradable	0.130364	0.667532	0.59531	0.956426	0.502136	-0.962983	0.752222
piperidinium	C283_A33	0.033	226.48	45.02	2.927	8.75	0.097	0	8.75	0.262	24.187	1.915	0.172	0.202	-0.03	0	1.064	0	0	0.007	1.42	73.6945	15.3151	0.31821	10.6721	not readily biodegradable	0.512065	0.889608	0.696514	0.967687	0.505213	-1.22528	0.956515
pyrrolidinium	C151_A27	0.035	212.45	59.05	6.313	8.25	0.108	0.027	8.25	0.515	22.66	1.91	0.197	0.209	0.292	0	0.88	0	0	0.005	2.801	77.3407	11.6096	0.379772	10.67	not readily biodegradable	0.163368	0.899987	0.468143	0.887992	0.491793	-1.37115	1.034
piperidinium	C271_A57	0.038	198.42	96.07	4.388	7.75	0.097	0.517	7.75	0.214	21.133	1.903	0.192	0.204	0.208	0	0.951	0	0	0.011	1.303	75.6606	12.8764	0.80683	10.6561	not readily biodegradable	0.82766	0.962588	0.775749	0.918744	0.497487	-0.930139	1.49312
pyrrolidinium	C180_A24	0.038	198.42	152.03	12.595	7.75	0.095	0.531	7.75	0.09	21.133	1.903	0.169	0.217	-0.242	0.159	0.924	0	0	0.01	2.718	76.2156	12.3662	0.767146	10.651	not readily biodegradable	0.329786	0.957927	0.657457	0.90705	0.495337	-0.990386	1.63253
piperidinium	C261_A70	0.035	212.45	120.17	11.655	8.25	0.101	0.092	8.25	0.365	22.66	1.91	0.197	0.266	0.109	0.13	1.061	0	2	0.006	1.852	73.7809	15.252	0.316314	10.6508	not readily biodegradable	0.497278	0.889031	0.459155	0.966388	0.50433	-1.61388	1.09851
piperazinium	C866_A64	0.027	171.35	132.08	11.425	6.2	0.085	0.344	6.333	0.309	17.574	1.953	0.179	0.193	0.243	0.131	0.668	0	0	0.008	2.425	80.969	8.35517	0.0307043	10.6452	not readily biodegradable	0.752686	0.693251	0.532513	0.796169	0.478666	-1.06656	1.617
piperidinium	C291_A53	0.035	212.45	111.11	8.56	8.25	0.094	0.455	8.25	0.144	22.66	1.91	0.186	0.176	0.286	0.163	1.061	0	0	0.01	1.673	73.2713	15.1466	0.944416	10.6376	not readily biodegradable	0.56026	0.977889	0.708628	0.966388	0.505916	-1.36811	1.19299
morpholinium	C850_A7	0.061	258.48	149.08	7.722	9.083	0.068	0.609	9.75	0.363	25.616	1.924	0.169	0.209	-0.055	0	1.064	0	0	0.005	2.254	73.0765	15.1867	1.11307	10.6238	not readily biodegradable	0.0902106	0.991368	0.51427	0.967687	0.506295	-0.65223	0.812478
piperidinium	C282_A14	0.035	212.45	58.09	1.345	8.25	0.096	0	8.25	0.171	22.66	1.91	0.176	0.197	0.014	0	1.038	1	0	0.009	1.2517	74.4534	14.7777	0.163121	10.6058	not readily biodegradable	0.708497	0.83484	0.812537	0.956426	0.50063	-1.34476	1.04418
pyrrolidinium	C134_A56	0.035	212.45	90.07	5.196	8.25	0.092	0	8.25	0.096	22.66	1.91	0.176	0.186	0.064	0.116	1.061	0	3	0.01	2.146	73.9744	15.292	0.128557	10.605	not readily biodegradable	0.393833	0.816139	0.795999	0.966388	0.502402	-1.46204	1.08276
imidazolium	C435_A66	0.04	237.46	135.11	14.945	8.4	0.056	0.139	9.167	0.336	24.155	1.933	0.164	0.225	-0.172	0.133	1.049	0	0	0.01	2.622	74.3216	15.0412	0.0344309	10.6028	not readily biodegradable	0.0920114	0.709414	0.494298	0.96119	0.501043	-0.883753	0.833836
piperidinium	C282_A55	0.035	212.45	62.01	2.925	8.25	0.096	0	8.25	0.171	22.66	1.91	0.176	0.197	0.013	0	1.038	0	0	0.009	1.214	74.4615	14.7793	0.163139	10.5961	not readily biodegradable	0.721762	0.83484	0.782336	0.956426	0.500345	-0.870649	1.29117
imidazolium	C10_A69	0.038	251.49	180.15	8.406	8.9	0.077	0.529	9.667	0.798	25.681	1.937	0.185	0.271	0.052	0.125	1.108	0	0	0.005	2.21	72.1433	16.2056	1.05809	10.593	not readily biodegradable	0.0998514	0.988316	0.292112	0.986745	0.509079	-0.631109	0.998548
piperidinium	C263_A14	0.031	240.51	58.09	1.345	9.25	0.103	0	9.25	0.583	25.714	1.92	0.173	0.201	0.014	0	1.064	1	0	0.004	1.2517	73.3516	15.2438	0.833884	10.5707	not readily biodegradable	0.434069	0.967753	0.509396	0.967687	0.503852	-1.53856	0.759096
piperidinium	C263_A55	0.031	240.51	62.01	2.925	9.25	0.103	0	9.25	0.583	25.714	1.92	0.173	0.201	0.013	0	1.064	0	0	0.004	1.214	73.3595	15.2455	0.833974	10.561	not readily biodegradable	0.447333	0.967753	0.479195	0.967687	0.503567	-1.06444	1.00609
pyrrolidinium	C134_A67	0.035	212.45	197.65	2.652	8.25	0.092	0	8.25	0.096	22.66	1.91	0.176	0.186	0.057	0	1.061	0	0	0.01	0.863	74.0307	15.3036	0.128655	10.537	not readily biodegradable	0.845263	0.816139	0.844626	0.966388	0.500404	-1.53446	1.37229
imidazolium	C32_A7	0.038	251.49	149.08	7.722	8.9	0.064	0.609	9.667	0.522	25.681	1.937	0.171	0.235	-0.055	0	1.104	0	0	0.005	2.254	72.5876	16.1905	0.698811	10.5231	not readily biodegradable	0.0843698	0.954333	0.437847	0.985012	0.505512	-0.488211	0.975426
imidazolium	C66_A27	0.04	237.46	59.05	6.313	8.4	0.057	0.027	9.167	0.304	24.155	1.933	0.185	0.195	0.292	0	1.038	0	0	0.01	2.801	74.645	14.8157	0.0230231	10.5162	not readily biodegradable	0.0290294	0.676575	0.674673	0.956426	0.49757	-0.679749	0.704921
imidazolium	C30_A33	0.043	223.43	45.02	2.927	7.9	0.058	0	8.667	0.338	22.628	1.929	0.178	0.235	-0.03	0	0.968	0	0	0.007	1.42	76.144	13.354	0.0119618	10.49	not readily biodegradable	0.652155	0.622114	0.659984	0.926107	0.491404	-0.303218	0.899273
imidazolium	C66_A49	0.04	237.46	95.11	7.497	8.4	0.057	0.538	9.167	0.304	24.155	1.933	0.185	0.195	0.291	0	1.038	0	0	0.01	1.258	74.5273	14.7924	0.191558	10.4888	not readily biodegradable	0.571941	0.847732	0.652041	0.956426	0.497284	-0.688759	0.809537
piperidinium	C292_A33	0.033	226.48	45.02	2.927	8.75	0.095	0	8.75	0.186	24.187	1.915	0.172	0.197	-0.03	0	1.064	0	0	0.01	1.42	73.8798	15.3536	0.284117	10.4825	not readily biodegradable	0.512065	0.880257	0.79611	0.967687	0.499532	-1.22528	0.956515
pyridinium	C219_A64	0.029	164.3	132.08	11.425	6.2	0.042	0.344	7	0.146	16.499	1.861	0.206	0.169	0.243	0.131	0.472	0	0	0.008	2.425	83.4281	6.0878	0.00262189	10.4814	not readily biodegradable	0.849284	0.492214	0.610859	0.711276	0.466476	0.27236	1.46733
piperazinium	C875_A57	0.057	213.44	96.07	4.388	8.45	0.082	0.517	8.583	0.243	22.155	1.873	0.199	0.188	0.208	0	0.97	0	0	0.008	1.303	75.4593	13.2808	0.804693	10.4552	not readily biodegradable	0.735825	0.962589	0.698743	0.926973	0.492973	-0.829323	1.32357
imidazolium	C66_A53	0.04	237.46	111.11	8.56	8.4	0.057	0.455	9.167	0.304	24.155	1.933	0.185	0.195	0.286	0.163	1.038	0	0	0.01	1.673	74.6092	14.8086	0.135897	10.4462	not readily biodegradable	0.425922	0.819931	0.631723	0.956426	0.495857	-0.676709	0.863915
imidazolium	C21_A33	0.04	237.46	45.02	2.927	8.4	0.066	0	9.167	0.081	24.155	1.933	0.164	0.185	-0.03	0	1.049	0	0	0.012	1.42	74.4607	15.0694	0.034579	10.4354	not readily biodegradable	0.514941	0.709609	0.888624	0.96119	0.496121	-0.450057	0.776391
imidazolium	C443_A69	0.038	251.49	180.15	8.406	8.9	0.06	0.529	9.667	0.356	25.681	1.937	0.171	0.205	0.052	0.125	1.105	0	0	0.009	2.21	72.8833	16.2852	0.39935	10.4321	not readily biodegradable	0.0998514	0.908836	0.58865	0.985446	0.501964	-0.631109	0.998548
imidazolium	C9_A70	0.043	223.43	120.17	11.655	7.9	0.071	0.092	8.667	0.577	22.628	1.929	0.19	0.25	0.109	0.13	0.976	0	2	0.005	1.852	76.0227	13.5227	0.0371431	10.4175	not readily biodegradable	0.500154	0.713708	0.336234	0.929572	0.489939	-0.775644	0.892316
piperazinium	C871_A66	0.076	157.32	135.11	14.945	6.45	0.075	0.139	6.583	0.01	16.047	1.829	0.2	0.208	-0.172	0.133	0.676	0	0	0.012	2.622	81.0936	8.48722	0.0100387	10.4092	not readily biodegradable	0.820585	0.602882	0.693035	0.799634	0.472213	-1.06321	1.73047
piperidinium	C262_A62	0.033	226.48	121.12	10.465	8.75	0.102	0	8.75	0.478	24.187	1.915	0.191	0.191	0.308	0.085	1.064	0	0	0.005	2.513	73.8436	15.3461	0.425948	10.3843	not readily biodegradable	0.127488	0.912984	0.406565	0.967687	0.497063	-1.73821	0.932345
pyrrolidinium	C134_A69	0.035	212.45	180.15	8.406	8.25	0.092	0.529	8.25	0.096	22.66	1.91	0.176	0.186	0.052	0.125	1.061	0	0	0.01	2.21	73.3177	15.1562	1.14414	10.3819	not readily biodegradable	0.371314	0.993324	0.734642	0.966388	0.498977	-1.22624	1.4722
pyrrolidinium	C183_A56	0.031	240.51	90.07	5.196	9.25	0.1	0	9.25	0.334	25.714	1.92	0.173	0.186	0.064	0.116	1.102	0	3	0.006	2.146	72.754	16.1703	0.695175	10.3805	not readily biodegradable	0.119405	0.953727	0.597514	0.984146	0.501079	-1.65583	0.797677
imidazolium	C39_A63	0.043	223.43	87.06	8.284	7.9	0.056	0.482	8.667	0.309	22.628	1.929	0.19	0.214	0.245	0.152	0.977	0	0	0.008	1.495	76.0332	13.5485	0.0786	10.3397	not readily biodegradable	0.625766	0.774207	0.592551	0.930005	0.48785	-0.565479	0.896383
imidazolium	C39_A64	0.043	223.43	132.08	11.425	7.9	0.056	0.344	8.667	0.309	22.628	1.929	0.19	0.214	0.243	0.131	0.977	0	0	0.008	2.425	76.0757	13.556	0.0443598	10.3239	not readily biodegradable	0.298541	0.727984	0.532513	0.930005	0.487279	-0.65496	0.988196
piperidinium	C274_A14	0.031	240.51	58.09	1.345	9.25	0.101	0	9.25	0.525	25.714	1.92	0.206	0.335	0.014	0	1.064	1	0	0.005	1.2517	73.633	15.3023	0.745526	10.3191	not readily biodegradable	0.434069	0.958402	0.558296	0.967687	0.496114	-1.53856	0.759096
imidazolium	C10_A55	0.038	251.49	62.01	2.925	8.9	0.077	0	9.667	0.798	25.681	1.937	0.185	0.271	0.013	0	1.108	0	0	0.005	1.214	73.1347	16.4283	0.119452	10.3176	not readily biodegradable	0.450299	0.81113	0.396877	0.986745	0.497948	-0.275519	0.817513
pyrrolidinium	C182_A66	0.033	226.48	135.11	14.945	8.75	0.099	0.139	8.75	0.381	24.187	1.915	0.162	0.181	-0.172	0.133	0.983	0	0	0.008	2.622	75.4468	13.5873	0.651183	10.3147	not readily biodegradable	0.0891359	0.945516	0.430624	0.932604	0.489307	-1.65898	1.01396
pyrrolidinium	C183_A67	0.031	240.51	197.65	2.652	9.25	0.1	0	9.25	0.334	25.714	1.92	0.173	0.186	0.057	0	1.102	0	0	0.006	0.863	72.8083	16.1824	0.695693	10.3137	not readily biodegradable	0.570835	0.953727	0.646141	0.984146	0.499081	-1.72825	1.0872
piperidinium	C274_A55	0.031	240.51	62.01	2.925	9.25	0.101	0	9.25	0.525	25.714	1.92	0.206	0.335	0.013	0	1.064	0	0	0.005	1.214	73.6409	15.304	0.745605	10.3096	not readily biodegradable	0.447333	0.958402	0.528096	0.967687	0.495828	-1.06444	1.00609
piperazinium	C872_A56	0.07	171.35	90.07	5.196	6.95	0.081	0	7.083	0.074	17.574	1.843	0.208	0.208	0.064	0.116	0.859	0	3	0.009	2.146	78.3548	11.3332	0.0143448	10.2977	not readily biodegradable	0.850853	0.634469	0.785551	0.878896	0.478568	-1.0354	1.50537
pyrrolidinium	C173_A70	0.033	226.48	120.17	11.655	8.75	0.101	0.092	8.75	0.351	24.187	1.915	0.177	0.181	0.109	0.13	1.089	0	2	0.005	1.852	73.2243	15.9051	0.583888	10.2867	not readily biodegradable	0.360064	0.939124	0.444862	0.978516	0.496782	-1.69771	0.949557
piperidinium	C272_A70	0.035	212.45	120.17	11.655	8.25	0.099	0.092	8.25	0.312	22.66	1.91	0.186	0.209	0.109	0.13	1.061	0	2	0.008	1.852	74.1261	15.3233	0.283034	10.2676	not readily biodegradable	0.497278	0.87968	0.526675	0.966388	0.492895	-1.61388	1.09851
piperidinium	C291_A64	0.035	212.45	132.08	11.425	8.25	0.094	0.344	8.25	0.144	22.66	1.91	0.186	0.176	0.243	0.131	1.061	0	0	0.01	2.425	73.8692	15.2702	0.600718	10.2599	not readily biodegradable	0.295665	0.94071	0.653865	0.966388	0.493644	-1.4932	1.19439
piperidinium	C291_A63	0.035	212.45	87.06	8.284	8.25	0.094	0.482	8.25	0.144	22.66	1.91	0.186	0.176	0.245	0.152	1.061	0	0	0.01	1.495	73.5122	15.1964	1.05985	10.2315	not readily biodegradable	0.62289	0.986932	0.713903	0.966388	0.494215	-1.40372	1.10258
piperidinium	C261_A56	0.035	212.45	90.07	5.196	8.25	0.101	0	8.25	0.365	22.66	1.91	0.197	0.266	0.064	0.116	1.061	0	3	0.006	2.146	74.2141	15.3415	0.217208	10.2272	not readily biodegradable	0.393833	0.858216	0.582614	0.966388	0.491486	-1.46204	1.08276
piperidinium	C262_A27	0.033	226.48	59.05	6.313	8.75	0.102	0.027	8.75	0.478	24.187	1.915	0.191	0.191	0.292	0	1.064	0	0	0.005	2.801	73.9325	15.3646	0.477016	10.2259	not readily biodegradable	0.0261539	0.922028	0.485927	0.967687	0.492497	-1.45498	0.885044
piperidinium	C282_A33	0.035	212.45	45.02	2.927	8.25	0.096	0	8.25	0.171	22.66	1.91	0.176	0.197	-0.03	0	1.038	0	0	0.009	1.42	74.807	14.8479	0.163896	10.1812	not readily biodegradable	0.649279	0.83484	0.782298	0.956426	0.488072	-1.14146	1.10547
piperazinium	C872_A69	0.07	171.35	180.15	8.406	6.95	0.081	0.529	7.083	0.074	17.574	1.843	0.208	0.208	0.052	0.125	0.859	0	0	0.009	2.21	78.3669	11.3349	0.128831	10.1694	not readily biodegradable	0.828335	0.811654	0.724194	0.878896	0.475143	-0.799601	1.89482
piperazinium	C870_A66	0.082	143.29	135.11	14.945	5.95	0.072	0.139	6.083	0	14.521	1.813	0.209	0.209	-0.172	0.133	0.391	0	0	0.007	2.622	84.4854	5.34241	0.00472621	10.1675	not readily biodegradable	0.957709	0.538763	0.59273	0.676193	0.455103	-0.965457	1.87103
piperidinium	C261_A67	0.035	212.45	197.65	2.652	8.25	0.101	0	8.25	0.365	22.66	1.91	0.197	0.266	0.057	0	1.061	0	0	0.006	0.863	74.2692	15.3529	0.21737	10.1605	not readily biodegradable	0.845263	0.858216	0.631241	0.966388	0.489488	-1.53446	1.37229
piperazinium	C865_A56	0.029	157.32	90.07	5.196	5.7	0.081	0	5.833	0.213	16.047	1.948	0.184	0.235	0.064	0.116	0.525	0	3	0.01	2.146	83.1729	6.66535	0.00322747	10.1586	not readily biodegradable	0.988067	0.509237	0.739763	0.734232	0.458993	-0.950096	1.65031
piperidinium	C263_A33	0.031	240.51	45.02	2.927	9.25	0.103	0	9.25	0.583	25.714	1.92	0.173	0.201	-0.03	0	1.064	0	0	0.004	1.42	73.6975	15.3158	0.837817	10.1489	not readily biodegradable	0.374851	0.967753	0.479157	0.967687	0.491294	-1.33525	0.820386
pyrrolidinium	C134_A14	0.035	212.45	58.09	1.345	8.25	0.092	0	8.25	0.096	22.66	1.91	0.176	0.186	0.014	0	1.061	1	0	0.01	1.2517	74.3723	15.3742	0.129248	10.1242	not readily biodegradable	0.708497	0.816139	0.869608	0.966388	0.488131	-1.34476	1.04418
pyrrolidinium	C134_A55	0.035	212.45	62.01	2.925	8.25	0.092	0	8.25	0.096	22.66	1.91	0.176	0.186	0.013	0	1.061	0	0	0.01	1.214	74.3801	15.3758	0.129262	10.1147	not readily biodegradable	0.721762	0.816139	0.839407	0.966388	0.487846	-0.870649	1.29117
piperazinium	C862_A71	0.037	115.23	164.2	20.105	4.2	0.086	0.587	4.333	0	11.467	1.929	0.207	0.181	0.516	0.112	0.002	0	2	0.005	3.451	87.1248	2.76964	0.0080179	10.0976	not readily biodegradable	0.940449	0.578946	0.452056	0.507706	0.445277	-0.997305	2.11222
imidazolium	C443_A55	0.038	251.49	62.01	2.925	8.9	0.06	0	9.667	0.356	25.681	1.937	0.171	0.205	0.013	0	1.105	0	0	0.009	1.214	73.4467	16.4111	0.0448167	10.0974	not readily biodegradable	0.450299	0.731651	0.693415	0.985446	0.490833	-0.275519	0.817513
piperazinium	C379_A28	0.034	144.28	171.21	14.741	4.833	0.068	0.297	5.75	0	14.015	1.866	0.233	0.202	0.547	0.09	0.348	0	0	0.004	3.092	84.925	4.9771	0.00181471	10.0961	not readily biodegradable	0.837805	0.461075	0.533562	0.657568	0.451897	-0.917263	1.82515
imidazolium	C434_A65	0.043	223.43	124.16	12.137	7.9	0.053	0.435	8.667	0.296	22.628	1.929	0.201	0.214	0.403	0.12	0.97	0	1	0.01	1.98	76.4148	13.449	0.0546316	10.0816	not readily biodegradable	0.455116	0.744438	0.567197	0.926973	0.479612	-0.728402	0.927814
piperazinium	C874_A24	0.06	199.41	152.03	12.595	7.95	0.08	0.531	8.083	0.155	20.628	1.865	0.2	0.277	-0.242	0.159	0.872	0	0	0.01	2.718	77.9791	11.5411	0.422005	10.0579	not readily biodegradable	0.375164	0.907835	0.626214	0.884527	0.473511	-0.830403	1.62074
imidazolium	C434_A54	0.043	223.43	162.16	11.879	7.9	0.053	0.311	8.667	0.296	22.628	1.929	0.201	0.214	0.4	0.091	0.97	1	1	0.01	2.792	76.4559	13.4562	0.032676	10.0552	not readily biodegradable	0.16941	0.702905	0.572128	0.926973	0.478756	-0.776099	1.01911
imidazolium	C66_A63	0.04	237.46	87.06	8.284	8.4	0.057	0.482	9.167	0.304	24.155	1.933	0.185	0.195	0.245	0.152	1.038	0	0	0.01	1.495	74.9243	14.8712	0.152649	10.0518	not readily biodegradable	0.488552	0.828975	0.636999	0.956426	0.484155	-0.712318	0.773502
imidazolium	C66_A64	0.04	237.46	132.08	11.425	8.4	0.057	0.344	9.167	0.304	24.155	1.933	0.185	0.195	0.243	0.131	1.038	0	0	0.01	2.425	74.99	14.8842	0.0861787	10.0396	not readily biodegradable	0.161327	0.782753	0.576961	0.956426	0.483585	-0.801799	0.865314
piperazinium	C865_A69	0.029	157.32	180.15	8.406	5.7	0.081	0.529	5.833	0.213	16.047	1.948	0.184	0.235	0.052	0.125	0.525	0	0	0.01	2.21	83.2607	6.67239	0.0290121	10.0379	not readily biodegradable	0.965549	0.686422	0.678406	0.734232	0.455568	-0.714294	2.03976
pyrrolidinium	C181_A66	0.035	212.45	135.11	14.945	8.25	0.097	0.139	8.25	0.128	22.66	1.91	0.176	0.221	-0.172	0.133	0.928	0	0	0.008	2.622	77.0923	12.5972	0.318616	9.9918	not readily biodegradable	0.22635	0.886072	0.552229	0.908782	0.474814	-1.57515	1.16291
imidazolium	C9_A56	0.043	223.43	90.07	5.196	7.9	0.071	0	8.667	0.577	22.628	1.929	0.19	0.25	0.064	0.116	0.976	0	3	0.005	2.146	76.3988	13.5896	0.0254822	9.9861	not readily biodegradable	0.396708	0.682893	0.459693	0.929572	0.477096	-0.623801	0.876564
imidazolium	C39_A57	0.043	223.43	96.07	4.388	7.9	0.056	0.517	8.667	0.309	22.628	1.929	0.19	0.214	0.208	0	0.977	0	0	0.008	1.303	76.3248	13.6004	0.0912336	9.98358	not readily biodegradable	0.693322	0.78593	0.66702	0.930005	0.47729	-0.151066	1.12916
pyridinium	C210_A68	0.027	178.33	153.11	17.981	6.283	0.045	0.463	7.167	0.11	18.026	1.913	0.241	0.231	0.833	0.091	0.552	0	0	0.011	2.518	83.0869	6.984	0.00564245	9.92344	not readily biodegradable	0.679347	0.554414	0.565917	0.745926	0.453109	-0.133947	1.29573
imidazolium	C9_A67	0.043	223.43	197.65	2.652	7.9	0.071	0	8.667	0.577	22.628	1.929	0.19	0.25	0.057	0	0.976	0	0	0.005	0.863	76.4552	13.5996	0.025501	9.91967	not readily biodegradable	0.848138	0.682893	0.50832	0.929572	0.475098	-0.69622	1.16609
pyrrolidinium	C183_A14	0.031	240.51	58.09	1.345	9.25	0.1	0	9.25	0.334	25.714	1.92	0.173	0.186	0.014	0	1.102	1	0	0.006	1.2517	73.1375	16.2556	0.69884	9.90807	not readily biodegradable	0.434069	0.953727	0.671123	0.984146	0.486808	-1.53856	0.759096
piperidinium	C274_A33	0.031	240.51	45.02	2.927	9.25	0.101	0	9.25	0.525	25.714	1.92	0.206	0.335	-0.03	0	1.064	0	0	0.005	1.42	73.975	15.3734	0.748988	9.90261	not readily biodegradable	0.374851	0.958402	0.528057	0.967687	0.483556	-1.33525	0.820386
pyrrolidinium	C183_A55	0.031	240.51	62.01	2.925	9.25	0.1	0	9.25	0.334	25.714	1.92	0.173	0.186	0.013	0	1.102	0	0	0.006	1.214	73.1451	16.2572	0.698912	9.89874	not readily biodegradable	0.447333	0.953727	0.640923	0.984146	0.486523	-1.06444	1.00609
morpholinium	C848_A55	0.067	230.42	62.01	2.925	8.083	0.063	0	8.75	0.199	22.563	1.915	0.172	0.166	0.013	0	1.012	0	0	0.007	1.214	75.7409	14.3579	0.0199478	9.88122	not readily biodegradable	0.730478	0.663825	0.726833	0.945165	0.476581	-0.194947	0.918011
pyrrolidinium	C173_A56	0.033	226.48	90.07	5.196	8.75	0.101	0	8.75	0.351	24.187	1.915	0.177	0.181	0.064	0.116	1.089	0	3	0.005	2.146	73.7079	16.0101	0.40124	9.88074	not readily biodegradable	0.256619	0.908309	0.568321	0.978516	0.483938	-1.54587	0.933806
piperidinium	C291_A57	0.035	212.45	96.07	4.388	8.25	0.094	0.517	8.25	0.144	22.66	1.91	0.186	0.176	0.208	0	1.061	0	0	0.01	1.303	73.6755	15.2302	1.22822	9.8661	not readily biodegradable	0.690446	0.998655	0.788372	0.966388	0.483655	-0.989306	1.33536
imidazolium	C9_A69	0.043	223.43	180.15	8.406	7.9	0.071	0.529	8.667	0.577	22.628	1.929	0.19	0.25	0.052	0.125	0.976	0	0	0.005	2.21	76.34	13.5791	0.228644	9.85231	not readily biodegradable	0.37419	0.860078	0.398337	0.929572	0.473671	-0.387999	1.26601
piperidinium	C272_A56	0.035	212.45	90.07	5.196	8.25	0.099	0	8.25	0.312	22.66	1.91	0.186	0.209	0.064	0.116	1.061	0	3	0.008	2.146	74.5449	15.4099	0.194313	9.8509	not readily biodegradable	0.393833	0.848866	0.650133	0.966388	0.480052	-1.46204	1.08276
pyrrolidinium	C173_A67	0.033	226.48	197.65	2.652	8.75	0.101	0	8.75	0.351	24.187	1.915	0.177	0.181	0.057	0	1.089	0	0	0.005	0.863	73.7613	16.0217	0.401531	9.81547	not readily biodegradable	0.708049	0.908309	0.616947	0.978516	0.48194	-1.61829	1.22333
piperazinium	C379_A71	0.034	144.28	164.2	20.105	4.833	0.068	0.587	5.75	0	14.015	1.866	0.233	0.202	0.516	0.112	0.348	0	2	0.004	3.451	85.2093	4.99376	0.00606511	9.79093	not readily biodegradable	0.711489	0.558209	0.431034	0.657568	0.44305	-0.955655	1.7849
piperidinium	C272_A67	0.035	212.45	197.65	2.652	8.25	0.099	0	8.25	0.312	22.66	1.91	0.186	0.209	0.057	0	1.061	0	0	0.008	0.863	74.599	15.4211	0.194454	9.78551	not readily biodegradable	0.845263	0.848866	0.69876	0.966388	0.478054	-1.53446	1.37229
piperazinium	C873_A3	0.065	185.38	280.17	17.864	7.45	0.078	0.792	7.583	0.111	19.101	1.855	0.174	0.174	-0.358	0.071	0.865	0	2	0.009	4.087	78.1914	11.4302	0.598431	9.78004	not readily biodegradable	0.0306892	0.935812	0.525628	0.881495	0.465295	-1.16897	1.92206
piperidinium	C261_A14	0.035	212.45	58.09	1.345	8.25	0.101	0	8.25	0.365	22.66	1.91	0.197	0.266	0.014	0	1.061	1	0	0.006	1.2517	74.6038	15.4221	0.218349	9.75581	not readily biodegradable	0.708497	0.858216	0.656223	0.966388	0.477216	-1.34476	1.04418
piperidinium	C261_A55	0.035	212.45	62.01	2.925	8.25	0.101	0	8.25	0.365	22.66	1.91	0.197	0.266	0.013	0	1.061	0	0	0.006	1.214	74.6115	15.4237	0.218371	9.7465	not readily biodegradable	0.721762	0.858216	0.626022	0.966388	0.476931	-0.870649	1.29117
piperazinium	C869_A17	0.091	129.26	301.01	23.151	5.45	0.079	0.771	5.583	0	12.994	1.793	0.219	0.242	-0.296	0.087	0.298	0	0	0.005	4.88	85.6145	4.59302	0.0531758	9.73929	not readily biodegradable	0.300435	0.733082	0.393834	0.635912	0.440461	-0.838219	2.53863
piperazinium	C866_A31	0.027	171.35	96.1	6.665	6.2	0.085	0.498	6.333	0.309	17.574	1.953	0.179	0.193	0.15	0	0.668	0	0	0.008	4.5554	81.7733	8.43816	0.0587489	9.72983	not readily biodegradable	0.00309443	0.744833	0.623497	0.796169	0.452123	-0.845631	1.61773
piperazinium	C863_A16	0.034	129.26	227.01	19.701	4.7	0.085	0.606	4.833	0	12.994	1.937	0.208	0.219	0.389	0.05	0.002	0	0	0.006	5.466	87.4753	2.78078	0.0152894	9.72865	not readily biodegradable	0.0942476	0.630728	0.4808	0.507706	0.434665	-1.26729	2.10198
piperazinium	C871_A24	0.076	157.32	152.03	12.595	6.45	0.075	0.531	6.583	0.01	16.047	1.829	0.2	0.208	-0.242	0.159	0.676	0	0	0.012	2.718	81.6776	8.54835	0.0514254	9.72259	not readily biodegradable	0.786806	0.73418	0.737954	0.799634	0.452235	-0.537608	2.04232
pyrrolidinium	C134_A33	0.035	212.45	45.02	2.927	8.25	0.092	0	8.25	0.096	22.66	1.91	0.176	0.186	-0.03	0	1.061	0	0	0.01	1.42	74.7143	15.4449	0.129843	9.71094	not readily biodegradable	0.649279	0.816139	0.839369	0.966388	0.475574	-1.14146	1.10547
imidazolium	C66_A57	0.04	237.46	96.07	4.388	8.4	0.057	0.517	9.167	0.304	24.155	1.933	0.185	0.195	0.208	0	1.038	0	0	0.01	1.303	75.1959	14.9251	0.177148	9.70193	not readily biodegradable	0.556108	0.840698	0.711468	0.956426	0.473595	-0.297905	1.00628
piperazinium	C875_A70	0.057	213.44	120.17	11.655	8.45	0.082	0.092	8.583	0.243	22.155	1.873	0.199	0.188	0.109	0.13	0.97	0	2	0.008	1.852	76.7675	13.5111	0.14036	9.58109	not readily biodegradable	0.542657	0.820238	0.55984	0.926973	0.464717	-1.4539	1.08672
pyridinium	C219_A31	0.029	164.3	96.1	6.665	6.2	0.042	0.498	7	0.146	16.499	1.861	0.206	0.169	0.15	0	0.472	0	0	0.008	4.5554	84.2776	6.14979	0.00501789	9.56757	not readily biodegradable	0.0996924	0.543796	0.701843	0.711276	0.439934	0.493291	1.46805
imidazolium	C9_A14	0.043	223.43	58.09	1.345	7.9	0.071	0	8.667	0.577	22.628	1.929	0.19	0.25	0.014	0	0.976	1	0	0.005	1.2517	76.7972	13.6604	0.0256151	9.51674	not readily biodegradable	0.711372	0.682893	0.533302	0.929572	0.462825	-0.506524	0.837984
pyrrolidinium	C172_A54	0.035	212.45	162.16	11.879	8.25	0.1	0.311	8.25	0.177	22.66	1.91	0.209	0.209	0.4	0.091	0.969	1	1	0.007	2.792	76.3124	13.4072	0.766045	9.51427	not readily biodegradable	0.166535	0.957709	0.566259	0.92654	0.464437	-1.61434	1.22531
imidazolium	C9_A55	0.043	223.43	62.01	2.925	7.9	0.071	0	8.667	0.577	22.628	1.929	0.19	0.25	0.013	0	0.976	0	0	0.005	1.214	76.8051	13.6618	0.0256177	9.50747	not readily biodegradable	0.724637	0.682893	0.503102	0.929572	0.46254	-0.0324089	1.08497
pyrrolidinium	C183_A33	0.031	240.51	45.02	2.927	9.25	0.1	0	9.25	0.334	25.714	1.92	0.173	0.186	-0.03	0	1.102	0	0	0.006	1.42	73.4672	16.3288	0.701989	9.50202	not readily biodegradable	0.374851	0.953727	0.640884	0.984146	0.474251	-1.33525	0.820386
pyrrolidinium	C172_A65	0.035	212.45	124.16	12.137	8.25	0.1	0.435	8.25	0.177	22.66	1.91	0.209	0.209	0.403	0.12	0.969	0	1	0.007	1.98	75.898	13.3344	1.27449	9.49312	not readily biodegradable	0.452241	0.999242	0.561327	0.92654	0.465293	-1.56664	1.13401
piperazinium	C864_A31	0.031	143.29	96.1	6.665	5.2	0.084	0.498	5.333	0.072	14.521	1.943	0.19	0.209	0.15	0	0.288	0	0	0.008	4.5554	85.9604	4.53076	0.0168474	9.49202	not readily biodegradable	0.277433	0.639972	0.737411	0.63158	0.43284	-0.662571	1.90323
piperazinium	C870_A24	0.082	143.29	152.03	12.595	5.95	0.072	0.531	6.083	0	14.521	1.813	0.209	0.209	-0.242	0.159	0.391	0	0	0.007	2.718	85.1111	5.38198	0.0242159	9.48274	not readily biodegradable	0.923931	0.670061	0.637648	0.676193	0.435125	-0.439856	2.18288
piperazinium	C866_A79	0.027	171.35	200.73	4.223	6.2	0.085	0.575	6.333	0.309	17.574	1.953	0.179	0.193	0.124	0	0.668	0	0	0.008	3.5528	81.9793	8.45943	0.0810675	9.48018	not readily biodegradable	0.355864	0.770624	0.670173	0.796169	0.444703	-1.0532	1.8313
piperazinium	C867_A4	0.025	185.38	125.14	10.406	6.7	0.088	0.416	6.833	0.357	19.101	1.956	0.2	0.18	0.562	0.13	0.771	0	0	0.007	2	80.5014	9.96605	0.0910723	9.44149	not readily biodegradable	0.76501	0.781486	0.507897	0.840781	0.448365	-1.18382	1.44572
pyrrolidinium	C173_A14	0.033	226.48	58.09	1.345	8.75	0.101	0	8.75	0.351	24.187	1.915	0.177	0.181	0.014	0	1.089	1	0	0.005	1.2517	74.0851	16.092	0.403293	9.4196	not readily biodegradable	0.571283	0.908309	0.64193	0.978516	0.469668	-1.42859	0.895225
imidazolium	C443_A7	0.038	251.49	149.08	7.722	8.9	0.06	0.609	9.667	0.356	25.681	1.937	0.171	0.205	-0.055	0	1.105	0	0	0.009	2.254	73.5802	16.4409	0.561883	9.41702	not readily biodegradable	0.0843698	0.935632	0.601724	0.985446	0.471425	-0.488211	0.975426
pyrrolidinium	C173_A55	0.033	226.48	62.01	2.925	8.75	0.101	0	8.75	0.351	24.187	1.915	0.177	0.181	0.013	0	1.089	0	0	0.005	1.214	74.0925	16.0937	0.403334	9.4105	not readily biodegradable	0.584548	0.908309	0.611729	0.978516	0.469383	-0.954475	1.14222
piperidinium	C272_A14	0.035	212.45	58.09	1.345	8.25	0.099	0	8.25	0.312	22.66	1.91	0.186	0.209	0.014	0	1.061	1	0	0.008	1.2517	74.9269	15.4889	0.195309	9.38888	not readily biodegradable	0.708497	0.848866	0.723742	0.966388	0.465782	-1.34476	1.04418
piperidinium	C272_A55	0.035	212.45	62.01	2.925	8.25	0.099	0	8.25	0.312	22.66	1.91	0.186	0.209	0.013	0	1.061	0	0	0.008	1.214	74.9345	15.4904	0.195329	9.37976	not readily biodegradable	0.721762	0.848866	0.693542	0.966388	0.465496	-0.870649	1.29117
piperidinium	C261_A33	0.035	212.45	45.02	2.927	8.25	0.101	0	8.25	0.365	22.66	1.91	0.197	0.266	-0.03	0	1.061	0	0	0.006	1.42	74.9386	15.4913	0.219329	9.35075	not readily biodegradable	0.649279	0.858216	0.625984	0.966388	0.464658	-1.14146	1.10547
piperazinium	C866_A70	0.027	171.35	120.17	11.655	6.2	0.085	0.092	6.333	0.309	17.574	1.953	0.179	0.193	0.109	0.13	0.668	0	2	0.008	1.852	82.165	8.47859	0.0109512	9.34545	not readily biodegradable	0.954299	0.608846	0.528117	0.796169	0.440422	-1.18725	1.52112
pyrrolidinium	C152_A66	0.033	226.48	135.11	14.945	8.75	0.109	0.139	8.75	0.622	24.187	1.915	0.181	0.238	-0.172	0.133	0.998	0	0	0.004	2.622	75.5374	13.9692	1.16347	9.32992	not readily biodegradable	0.0891359	0.992269	0.230697	0.939101	0.461955	-1.65898	1.01396
pyridinium	C219_A79	0.029	164.3	200.73	4.223	6.2	0.042	0.575	7	0.146	16.499	1.861	0.206	0.169	0.124	0	0.472	0	0	0.008	3.5528	84.507	6.16652	0.00692557	9.31958	not readily biodegradable	0.452462	0.569587	0.74852	0.711276	0.432513	0.285722	1.68163
piperidinium	C283_A66	0.033	226.48	135.11	14.945	8.75	0.097	0.139	8.75	0.262	24.187	1.915	0.172	0.202	-0.172	0.133	1.064	0	0	0.007	2.622	74.6103	15.5054	0.573529	9.31073	not readily biodegradable	0.0891359	0.936165	0.466799	0.967687	0.464685	-1.65898	1.01396
piperidinium	C273_A70	0.033	226.48	120.17	11.655	8.75	0.1	0.092	8.75	0.322	24.187	1.915	0.197	0.238	0.109	0.13	1.064	0	2	0.005	1.852	74.622	15.5079	0.56155	9.30854	not readily biodegradable	0.360064	0.934449	0.458801	0.967687	0.464581	-1.69771	0.949557
piperazinium	C867_A28	0.025	185.38	171.21	14.741	6.7	0.088	0.297	6.833	0.357	19.101	1.956	0.2	0.18	0.547	0.09	0.771	0	0	0.007	3.092	80.6546	9.98502	0.0556896	9.3047	not readily biodegradable	0.380785	0.741628	0.425036	0.840781	0.444084	-1.44846	1.45384
pyridinium	C219_A12	0.029	164.3	97.08	5.555	6.2	0.042	0.493	7	0.146	16.499	1.861	0.206	0.169	0.121	0	0.472	0	0	0.008	4.6173	84.5351	6.16857	0.00492988	9.29138	not readily biodegradable	0.0779126	0.542121	0.72306	0.711276	0.431657	0.641286	1.54441
piperazinium	C864_A79	0.031	143.29	200.73	4.223	5.2	0.084	0.575	5.333	0.072	14.521	1.943	0.19	0.209	0.124	0	0.288	0	0	0.008	3.5528	86.1909	4.54291	0.0232515	9.24299	not readily biodegradable	0.630202	0.665762	0.784088	0.63158	0.425419	-0.87014	2.11681
morpholinium	C848_A7	0.067	230.42	149.08	7.722	8.083	0.063	0.609	8.75	0.199	22.563	1.915	0.172	0.166	-0.055	0	1.012	0	0	0.007	2.254	76.0943	14.4249	0.250803	9.23003	not readily biodegradable	0.364549	0.867806	0.635142	0.945165	0.457173	-0.407639	1.07592
piperazinium	C864_A12	0.031	143.29	97.08	5.555	5.2	0.084	0.493	5.333	0.072	14.521	1.943	0.19	0.209	0.121	0	0.288	0	0	0.008	4.6173	86.2237	4.54463	0.016552	9.21515	not readily biodegradable	0.255653	0.638297	0.758628	0.63158	0.424563	-0.514576	1.9796
piperazinium	C871_A17	0.076	157.32	301.01	23.151	6.45	0.075	0.771	6.583	0.01	16.047	1.829	0.2	0.208	-0.296	0.087	0.676	0	0	0.012	4.88	82.0667	8.58906	0.139869	9.2044	not readily biodegradable	0.0260964	0.814566	0.536184	0.799634	0.436823	-1.02128	2.25312
imidazolium	C434_A62	0.043	223.43	121.12	10.465	7.9	0.053	0	8.667	0.296	22.628	1.929	0.201	0.214	0.308	0.085	0.97	0	0	0.01	2.513	77.2038	13.5878	0.00907893	9.19931	not readily biodegradable	0.267578	0.598738	0.599156	0.926973	0.452499	-0.816144	0.875104
piperidinium	C271_A69	0.038	198.42	180.15	8.406	7.75	0.097	0.529	7.75	0.214	21.133	1.903	0.192	0.204	0.052	0.125	0.951	0	0	0.011	2.21	76.878	13.0836	0.861665	9.17678	not readily biodegradable	0.508528	0.966608	0.698948	0.918744	0.452964	-1.16707	1.62997
piperazinium	C875_A56	0.057	213.44	90.07	5.196	8.45	0.082	0	8.583	0.243	22.155	1.873	0.199	0.188	0.064	0.116	0.97	0	3	0.008	2.146	77.1533	13.579	0.0963026	9.17138	not readily biodegradable	0.439211	0.789423	0.683298	0.926973	0.451874	-1.30206	1.07097
piperazinium	C872_A7	0.07	171.35	149.08	7.722	6.95	0.081	0.609	7.083	0.074	17.574	1.843	0.208	0.208	-0.055	0	0.859	0	0	0.009	2.254	79.2062	11.4563	0.181471	9.156	not readily biodegradable	0.812853	0.83845	0.737269	0.878896	0.444604	-0.656703	1.87169
imidazolium	C30_A66	0.043	223.43	135.11	14.945	7.9	0.058	0.139	8.667	0.338	22.628	1.929	0.178	0.235	-0.172	0.133	0.968	0	0	0.007	2.622	77.2751	13.5524	0.0216112	9.15084	not readily biodegradable	0.229225	0.668671	0.430269	0.926107	0.450876	-0.736914	0.956718
piperazinium	C869_A3	0.091	129.26	280.17	17.864	5.45	0.079	0.792	5.583	0	12.994	1.793	0.219	0.242	-0.358	0.071	0.298	0	2	0.005	4.087	86.1742	4.62304	0.0583963	9.14434	not readily biodegradable	0.579455	0.740115	0.494891	0.635912	0.422766	-0.803086	2.49301
piperidinium	C292_A66	0.033	226.48	135.11	14.945	8.75	0.095	0.139	8.75	0.186	24.187	1.915	0.172	0.197	-0.172	0.133	1.064	0	0	0.01	2.622	74.8051	15.5459	0.512131	9.1369	not readily biodegradable	0.0891359	0.926815	0.566396	0.967687	0.459004	-1.65898	1.01396
imidazolium	C9_A33	0.043	223.43	45.02	2.927	7.9	0.071	0	8.667	0.577	22.628	1.929	0.19	0.25	-0.03	0	0.976	0	0	0.005	1.42	77.1395	13.7213	0.0257292	9.1135	not readily biodegradable	0.652155	0.682893	0.503063	0.929572	0.450267	-0.303218	0.899273
imidazolium	C21_A66	0.04	237.46	135.11	14.945	8.4	0.066	0.139	9.167	0.081	24.155	1.933	0.164	0.185	-0.172	0.133	1.049	0	0	0.012	2.622	75.5414	15.2881	0.0624522	9.10809	not readily biodegradable	0.0920114	0.756167	0.658909	0.96119	0.455593	-0.883753	0.833836
piperazinium	C875_A67	0.057	213.44	197.65	2.652	8.45	0.082	0	8.583	0.243	22.155	1.873	0.199	0.188	0.057	0	0.97	0	0	0.008	0.863	77.2073	13.5885	0.09637	9.10784	not readily biodegradable	0.890641	0.789423	0.731925	0.926973	0.449876	-1.37448	1.3605
morpholinium	C849_A4	0.064	244.45	125.14	10.406	8.583	0.065	0.416	9.25	0.262	24.09	1.92	0.228	0.257	0.562	0.13	1.064	0	0	0.006	2	75.062	15.5993	0.231965	9.10669	not readily biodegradable	0.316706	0.862605	0.532536	0.967687	0.457227	-0.947204	0.654321
imidazolium	C39_A70	0.043	223.43	120.17	11.655	7.9	0.056	0.092	8.667	0.309	22.628	1.929	0.19	0.214	0.109	0.13	0.977	0	2	0.008	1.852	77.1616	13.7495	0.0158139	9.07309	not readily biodegradable	0.500154	0.643578	0.528117	0.930005	0.449034	-0.775644	0.892316
piperidinium	C291_A70	0.035	212.45	120.17	11.655	8.25	0.094	0.092	8.25	0.144	22.66	1.91	0.186	0.176	0.109	0.13	1.061	0	2	0.01	1.852	75.1846	15.5421	0.214898	9.05839	not readily biodegradable	0.497278	0.856304	0.649469	0.966388	0.455399	-1.61388	1.09851
imidazolium	C434_A27	0.043	223.43	59.05	6.313	7.9	0.053	0.027	8.667	0.296	22.628	1.929	0.201	0.214	0.292	0	0.97	0	0	0.01	2.801	77.3264	13.6094	0.0101713	9.05405	not readily biodegradable	0.166243	0.607781	0.678518	0.926973	0.447932	-0.53291	0.827802
imidazolium	C434_A49	0.043	223.43	95.11	7.497	7.9	0.053	0.538	8.667	0.296	22.628	1.929	0.201	0.214	0.291	0	0.97	0	0	0.01	1.258	77.2764	13.6006	0.0847069	9.03827	not readily biodegradable	0.709155	0.778938	0.655887	0.926973	0.447647	-0.54192	0.932419
pyrrolidinium	C173_A33	0.033	226.48	45.02	2.927	8.75	0.101	0	8.75	0.351	24.187	1.915	0.177	0.181	-0.03	0	1.089	0	0	0.005	1.42	74.4091	16.1624	0.405057	9.02347	not readily biodegradable	0.512065	0.908309	0.611691	0.978516	0.45711	-1.22528	0.956515
piperazinium	C865_A7	0.029	157.32	149.08	7.722	5.7	0.081	0.609	5.833	0.213	16.047	1.948	0.184	0.235	-0.055	0	0.525	0	0	0.01	2.254	84.1965	6.74738	0.0408877	9.01518	not readily biodegradable	0.950067	0.713218	0.69148	0.734232	0.42503	-0.571396	2.01664
piperazinium	C867_A71	0.025	185.38	164.2	20.105	6.7	0.088	0.587	6.833	0.357	19.101	1.956	0.2	0.18	0.516	0.112	0.771	0	2	0.007	3.451	80.8039	10.0035	0.185848	9.00677	not readily biodegradable	0.254469	0.838762	0.322508	0.840781	0.435236	-1.48686	1.41359
imidazolium	C434_A53	0.043	223.43	111.11	8.56	7.9	0.053	0.455	8.667	0.296	22.628	1.929	0.201	0.214	0.286	0.163	0.97	0	0	0.01	1.673	77.3338	13.6107	0.0600725	8.99543	not readily biodegradable	0.563136	0.751137	0.635568	0.926973	0.44622	-0.529869	0.986797
piperazinium	C875_A69	0.057	213.44	180.15	8.406	8.45	0.082	0.529	8.583	0.243	22.155	1.873	0.199	0.188	0.052	0.125	0.97	0	0	0.008	2.21	76.656	13.4914	0.859186	8.99341	not readily biodegradable	0.416693	0.966609	0.621942	0.926973	0.448449	-1.06626	1.46042
piperidinium	C272_A33	0.035	212.45	45.02	2.927	8.25	0.099	0	8.25	0.312	22.66	1.91	0.186	0.209	-0.03	0	1.061	0	0	0.008	1.42	75.2551	15.5567	0.196164	8.99199	not readily biodegradable	0.649279	0.848866	0.693503	0.966388	0.453224	-1.14146	1.10547
piperazinium	C868_A68	0.023	199.41	153.11	17.981	7.2	0.09	0.463	7.333	0.46	20.628	1.959	0.22	0.194	0.833	0.091	0.873	0	0	0.005	2.518	79.0738	11.7238	0.227047	8.97531	not readily biodegradable	0.445535	0.856672	0.271554	0.88496	0.439891	-1.51011	1.28692
piperazinium	C870_A17	0.082	143.29	301.01	23.151	5.95	0.072	0.771	6.083	0	14.521	1.813	0.209	0.209	-0.296	0.087	0.391	0	0	0.007	4.88	85.5552	5.41007	0.0658934	8.96879	not readily biodegradable	0.163221	0.750448	0.435879	0.676193	0.419713	-0.923527	2.39369
piperazinium	C866_A56	0.027	171.35	90.07	5.196	6.2	0.085	0	6.333	0.309	17.574	1.953	0.179	0.193	0.064	0.116	0.668	0	3	0.008	2.146	82.5464	8.51794	0.00751087	8.92815	not readily biodegradable	0.850853	0.578031	0.651575	0.796169	0.427579	-1.0354	1.50537
pyrrolidinium	C151_A70	0.035	212.45	120.17	11.655	8.25	0.108	0.092	8.25	0.515	22.66	1.91	0.197	0.209	0.109	0.13	0.88	0	2	0.005	1.852	78.7462	11.8206	0.506378	8.92678	not readily biodegradable	0.497278	0.921758	0.366035	0.887992	0.439564	-1.61388	1.09851
piperidinium	C273_A56	0.033	226.48	90.07	5.196	8.75	0.1	0	8.75	0.322	24.187	1.915	0.197	0.238	0.064	0.116	1.064	0	3	0.005	2.146	75.0882	15.6048	0.385753	8.92124	not readily biodegradable	0.256619	0.903634	0.58226	0.967687	0.451738	-1.54587	0.933806
piperidinium	C271_A55	0.038	198.42	62.01	2.925	7.75	0.097	0	7.75	0.214	21.133	1.903	0.192	0.204	0.013	0	0.951	0	0	0.011	1.214	77.7727	13.2358	0.0970745	8.89441	not readily biodegradable	0.858976	0.789422	0.803713	0.918744	0.441833	-0.811482	1.44894
piperazinium	C862_A16	0.037	115.23	227.01	19.701	4.2	0.086	0.606	4.333	0	11.467	1.929	0.207	0.181	0.389	0.05	0.002	0	0	0.005	5.466	88.3154	2.80749	0.00879415	8.8683	not readily biodegradable	0.231462	0.58531	0.459778	0.507706	0.409031	-1.14363	2.22966
piperidinium	C282_A66	0.035	212.45	135.11	14.945	8.25	0.096	0.139	8.25	0.171	22.66	1.91	0.176	0.197	-0.172	0.133	1.038	0	0	0.009	2.622	75.7979	15.0446	0.295638	8.86186	not readily biodegradable	0.22635	0.881397	0.552583	0.956426	0.447544	-1.57515	1.16291
piperidinium	C273_A67	0.033	226.48	197.65	2.652	8.75	0.1	0	8.75	0.322	24.187	1.915	0.197	0.238	0.057	0	1.064	0	0	0.005	0.863	75.1393	15.6154	0.386015	8.85925	not readily biodegradable	0.708049	0.903634	0.630886	0.967687	0.44974	-1.61829	1.22333
imidazolium	C66_A70	0.04	237.46	120.17	11.655	8.4	0.057	0.092	9.167	0.304	24.155	1.933	0.185	0.195	0.109	0.13	1.038	0	2	0.01	1.852	76.0565	15.0959	0.0307205	8.81691	not readily biodegradable	0.36294	0.698347	0.572565	0.956426	0.44534	-0.922483	0.769434
piperazinium	C866_A69	0.027	171.35	180.15	8.406	6.2	0.085	0.529	6.333	0.309	17.574	1.953	0.179	0.193	0.052	0.125	0.668	0	0	0.008	2.21	82.5963	8.52309	0.0674855	8.81315	not readily biodegradable	0.828335	0.755216	0.590219	0.796169	0.424154	-0.799601	1.89482
piperazinium	C863_A15	0.034	129.26	95.11	7.497	4.7	0.085	0.538	4.833	0	12.994	1.937	0.208	0.219	0.291	0	0.002	0	0	0.006	4.4469	88.387	2.80976	0.0116508	8.79161	not readily biodegradable	0.452823	0.607952	0.71407	0.507706	0.406695	-0.685155	1.99167
pyridinium	C219_A56	0.029	164.3	90.07	5.196	6.2	0.042	0	7	0.146	16.499	1.861	0.206	0.169	0.064	0.116	0.472	0	3	0.008	2.146	85.0335	6.20494	0.000641214	8.76091	not readily biodegradable	0.947451	0.376994	0.729922	0.711276	0.415389	0.303519	1.3557
pyrrolidinium	C172_A62	0.035	212.45	121.12	10.465	8.25	0.1	0	8.25	0.177	22.66	1.91	0.209	0.209	0.308	0.085	0.969	0	0	0.007	2.513	77.4471	13.6066	0.213916	8.73236	not readily biodegradable	0.264702	0.853541	0.593286	0.92654	0.43818	-1.65438	1.0813
piperazinium	C875_A14	0.057	213.44	58.09	1.345	8.45	0.082	0	8.583	0.243	22.155	1.873	0.199	0.188	0.014	0	0.97	1	0	0.008	1.2517	77.5345	13.6461	0.0967784	8.72261	not readily biodegradable	0.753875	0.789423	0.756907	0.926973	0.437604	-1.18478	1.03239
piperazinium	C875_A55	0.057	213.44	62.01	2.925	8.45	0.082	0	8.583	0.243	22.155	1.873	0.199	0.188	0.013	0	0.97	0	0	0.008	1.214	77.5421	13.6474	0.0967878	8.71376	not readily biodegradable	0.76714	0.789423	0.726707	0.926973	0.437318	-0.710666	1.27938
piperazinium	C379_A54	0.034	144.28	162.16	11.879	4.833	0.068	0.311	5.75	0	14.015	1.866	0.233	0.202	0.4	0.091	0.348	1	1	0.004	2.792	86.2503	5.05476	0.00195326	8.69302	not readily biodegradable	0.943362	0.465764	0.588267	0.657568	0.409943	-0.754023	1.87872
imidazolium	C39_A56	0.043	223.43	90.07	5.196	7.9	0.056	0	8.667	0.309	22.628	1.929	0.19	0.214	0.064	0.116	0.977	0	3	0.008	2.146	77.5066	13.811	0.0108441	8.67154	not readily biodegradable	0.396708	0.612764	0.651575	0.930005	0.436191	-0.623801	0.876564
piperidinium	C291_A56	0.035	212.45	90.07	5.196	8.25	0.094	0	8.25	0.144	22.66	1.91	0.186	0.176	0.064	0.116	1.061	0	3	0.01	2.146	75.5654	15.6209	0.147449	8.66624	not readily biodegradable	0.393833	0.825489	0.772928	0.966388	0.442556	-1.46204	1.08276
pyridinium	C219_A69	0.029	164.3	180.15	8.406	6.2	0.042	0.529	7	0.146	16.499	1.861	0.206	0.169	0.052	0.125	0.472	0	0	0.008	2.21	85.1314	6.21209	0.00576449	8.65073	not readily biodegradable	0.924933	0.554179	0.668565	0.711276	0.411964	0.539321	1.74514
piperazinium	C871_A3	0.076	157.32	280.17	17.864	6.45	0.075	0.792	6.583	0.01	16.047	1.829	0.2	0.208	-0.358	0.071	0.676	0	2	0.012	4.087	82.5693	8.64166	0.153538	8.63554	not readily biodegradable	0.305117	0.8216	0.637241	0.799634	0.419128	-0.986146	2.20751
imidazolium	C434_A63	0.043	223.43	87.06	8.284	7.9	0.053	0.482	8.667	0.296	22.628	1.929	0.201	0.214	0.245	0.152	0.97	0	0	0.01	1.495	77.6385	13.6644	0.0674586	8.62967	not readily biodegradable	0.625766	0.760181	0.640844	0.926973	0.434518	-0.565479	0.896383
imidazolium	C434_A64	0.043	223.43	132.08	11.425	7.9	0.053	0.344	8.667	0.296	22.628	1.929	0.201	0.214	0.243	0.131	0.97	0	0	0.01	2.425	77.6763	13.671	0.0380691	8.61459	not readily biodegradable	0.298541	0.713959	0.580806	0.926973	0.433947	-0.65496	0.988196
imidazolium	C39_A67	0.043	223.43	197.65	2.652	7.9	0.056	0	8.667	0.309	22.628	1.929	0.19	0.214	0.057	0	0.977	0	0	0.008	0.863	77.5589	13.8203	0.0108514	8.60987	not readily biodegradable	0.848138	0.612764	0.700202	0.930005	0.434193	-0.69622	1.16609
piperidinium	C291_A67	0.035	212.45	197.65	2.652	8.25	0.094	0	8.25	0.144	22.66	1.91	0.186	0.176	0.057	0	1.061	0	0	0.01	0.863	75.616	15.6313	0.147548	8.60512	not readily biodegradable	0.845263	0.825489	0.821554	0.966388	0.440558	-1.53446	1.37229
piperazinium	C379_A16	0.034	144.28	227.01	19.701	4.833	0.068	0.606	5.75	0	14.015	1.866	0.233	0.202	0.389	0.05	0.348	0	0	0.004	5.466	86.3413	5.0601	0.00664981	8.59191	not readily biodegradable	0.00250203	0.564573	0.438756	0.657568	0.406803	-1.10198	1.90234
pyrrolidinium	C172_A27	0.035	212.45	59.05	6.313	8.25	0.1	0.027	8.25	0.177	22.66	1.91	0.209	0.209	0.292	0	0.969	0	0	0.007	2.801	77.5472	13.6242	0.239584	8.58903	not readily biodegradable	0.163368	0.862584	0.672648	0.92654	0.433613	-1.37115	1.034
imidazolium	C39_A69	0.043	223.43	180.15	8.406	7.9	0.056	0.529	8.667	0.309	22.628	1.929	0.19	0.214	0.052	0.125	0.977	0	0	0.008	2.21	77.5291	13.815	0.0974042	8.55854	not readily biodegradable	0.37419	0.789949	0.590219	0.930005	0.432766	-0.387999	1.26601
piperidinium	C262_A70	0.033	226.48	120.17	11.655	8.75	0.102	0.092	8.75	0.478	24.187	1.915	0.191	0.191	0.109	0.13	1.064	0	2	0.005	1.852	75.1913	15.6262	0.635324	8.54714	not readily biodegradable	0.360064	0.943799	0.383819	0.967687	0.440267	-1.69771	0.949557
pyrrolidinium	C151_A56	0.035	212.45	90.07	5.196	8.25	0.108	0	8.25	0.515	22.66	1.91	0.197	0.209	0.064	0.116	0.88	0	3	0.005	2.146	79.2209	11.8919	0.347777	8.53944	not readily biodegradable	0.393833	0.890943	0.489494	0.887992	0.426721	-1.46204	1.08276
piperidinium	C273_A14	0.033	226.48	58.09	1.345	8.75	0.1	0	8.75	0.322	24.187	1.915	0.197	0.238	0.014	0	1.064	1	0	0.005	1.2517	75.4491	15.6798	0.387607	8.48349	not readily biodegradable	0.571283	0.903634	0.655869	0.967687	0.437467	-1.42859	0.895225
pyrrolidinium	C151_A67	0.035	212.45	197.65	2.652	8.25	0.108	0	8.25	0.515	22.66	1.91	0.197	0.209	0.057	0	0.88	0	0	0.005	0.863	79.2743	11.8999	0.348012	8.47781	not readily biodegradable	0.845263	0.890943	0.53812	0.887992	0.424723	-1.53446	1.37229
piperidinium	C273_A55	0.033	226.48	62.01	2.925	8.75	0.1	0	8.75	0.322	24.187	1.915	0.197	0.238	0.013	0	1.064	0	0	0.005	1.214	75.4563	15.6812	0.387643	8.47486	not readily biodegradable	0.584548	0.903634	0.625668	0.967687	0.437182	-0.954475	1.14222
pyrrolidinium	C134_A66	0.035	212.45	135.11	14.945	8.25	0.092	0.139	8.25	0.096	22.66	1.91	0.176	0.186	-0.172	0.133	1.061	0	0	0.01	2.622	75.689	15.6464	0.234166	8.43037	not readily biodegradable	0.22635	0.862696	0.609655	0.966388	0.435046	-1.57515	1.16291
imidazolium	C66_A56	0.04	237.46	90.07	5.196	8.4	0.057	0	9.167	0.304	24.155	1.933	0.185	0.195	0.064	0.116	1.038	0	3	0.01	2.146	76.3923	15.1625	0.0210648	8.42414	not readily biodegradable	0.259494	0.667532	0.696023	0.956426	0.432497	-0.770641	0.753683
piperazinium	C870_A3	0.082	143.29	280.17	17.864	5.95	0.072	0.792	6.083	0	14.521	1.813	0.209	0.209	-0.358	0.071	0.391	0	2	0.007	4.087	86.0838	5.44349	0.0723367	8.40037	not readily biodegradable	0.442241	0.757481	0.536936	0.676193	0.402018	-0.888394	2.34807
imidazolium	C66_A67	0.04	237.46	197.65	2.652	8.4	0.057	0	9.167	0.304	24.155	1.933	0.185	0.195	0.057	0	1.038	0	0	0.01	0.863	76.4426	15.1725	0.0210787	8.36375	not readily biodegradable	0.710924	0.667532	0.74465	0.956426	0.430499	-0.843059	1.04321
piperazinium	C875_A33	0.057	213.44	45.02	2.927	8.45	0.082	0	8.583	0.243	22.155	1.873	0.199	0.188	-0.03	0	0.97	0	0	0.008	1.42	77.8617	13.7036	0.0971868	8.33743	not readily biodegradable	0.694658	0.789423	0.726669	0.926973	0.425046	-0.981475	1.09368
imidazolium	C66_A69	0.04	237.46	180.15	8.406	8.4	0.057	0.529	9.167	0.304	24.155	1.933	0.185	0.195	0.052	0.125	1.038	0	0	0.01	2.21	76.35	15.1542	0.189049	8.30678	not readily biodegradable	0.236976	0.844717	0.634667	0.956426	0.429072	-0.534838	1.14313
imidazolium	C434_A57	0.043	223.43	96.07	4.388	7.9	0.053	0.517	8.667	0.296	22.628	1.929	0.201	0.214	0.208	0	0.97	0	0	0.01	1.303	77.9045	13.7112	0.0782695	8.30607	not readily biodegradable	0.693322	0.771904	0.715313	0.926973	0.423958	-0.151066	1.12916
piperidinium	C294_A67	0.029	254.54	197.65	2.652	9.75	0.097	0	9.75	0.37	27.24	1.924	0.191	0.21	0.057	0	1.064	0	0	0.01	0.863	75.0112	15.5888	1.12048	8.27954	not readily biodegradable	0.43371	0.989794	0.712927	0.967687	0.432734	-1.81208	0.938247
imidazolium	C39_A14	0.043	223.43	58.09	1.345	7.9	0.056	0	8.667	0.309	22.628	1.929	0.19	0.214	0.014	0	0.977	1	0	0.008	1.2517	77.8762	13.8769	0.0108958	8.23603	not readily biodegradable	0.711372	0.612764	0.725184	0.930005	0.421921	-0.506524	0.837984
piperidinium	C291_A14	0.035	212.45	58.09	1.345	8.25	0.094	0	8.25	0.144	22.66	1.91	0.186	0.176	0.014	0	1.061	1	0	0.01	1.2517	75.9225	15.6947	0.148146	8.23468	not readily biodegradable	0.708497	0.825489	0.846537	0.966388	0.428286	-1.34476	1.04418
imidazolium	C39_A55	0.043	223.43	62.01	2.925	7.9	0.056	0	8.667	0.309	22.628	1.929	0.19	0.214	0.013	0	0.977	0	0	0.008	1.214	77.8835	13.8782	0.0108968	8.22744	not readily biodegradable	0.724637	0.612764	0.694984	0.930005	0.421635	-0.0324089	1.08497
piperidinium	C291_A55	0.035	212.45	62.01	2.925	8.25	0.094	0	8.25	0.144	22.66	1.91	0.186	0.176	0.013	0	1.061	0	0	0.01	1.214	75.9295	15.6961	0.14816	8.22617	not readily biodegradable	0.721762	0.825489	0.816336	0.966388	0.428	-0.870649	1.29117
piperidinium	C271_A7	0.038	198.42	149.08	7.722	7.75	0.097	0.609	7.75	0.214	21.133	1.903	0.192	0.204	-0.055	0	0.951	0	0	0.011	2.254	77.4127	13.1746	1.20923	8.20348	not readily biodegradable	0.493047	0.993403	0.712022	0.918744	0.422425	-1.02417	1.60685
piperidinium	C262_A56	0.033	226.48	90.07	5.196	8.75	0.102	0	8.75	0.478	24.187	1.915	0.191	0.191	0.064	0.116	1.064	0	3	0.005	2.146	75.6613	15.7238	0.436432	8.17846	not readily biodegradable	0.256619	0.912984	0.507278	0.967687	0.427424	-1.54587	0.933806
piperazinium	C872_A66	0.07	171.35	135.11	14.945	6.95	0.081	0.139	7.083	0.074	17.574	1.843	0.208	0.208	-0.172	0.133	0.859	0	0	0.009	2.622	80.2393	11.6057	0.0261514	8.12885	not readily biodegradable	0.683371	0.681026	0.599207	0.878896	0.411212	-1.14852	1.58553
piperidinium	C262_A67	0.033	226.48	197.65	2.652	8.75	0.102	0	8.75	0.478	24.187	1.915	0.191	0.191	0.057	0	1.064	0	0	0.005	0.863	75.71	15.734	0.436714	8.11927	not readily biodegradable	0.708049	0.912984	0.555904	0.967687	0.425426	-1.61829	1.22333
pyrrolidinium	C172_A64	0.035	212.45	132.08	11.425	8.25	0.1	0.344	8.25	0.177	22.66	1.91	0.209	0.209	0.243	0.131	0.969	0	0	0.007	2.425	77.3997	13.5983	0.890972	8.1111	not readily biodegradable	0.295665	0.968762	0.574937	0.92654	0.419628	-1.4932	1.19439
piperidinium	C273_A33	0.033	226.48	45.02	2.927	8.75	0.1	0	8.75	0.322	24.187	1.915	0.197	0.238	-0.03	0	1.064	0	0	0.005	1.42	75.7588	15.7441	0.389198	8.10786	not readily biodegradable	0.512065	0.903634	0.62563	0.967687	0.424909	-1.22528	0.956515
pyrrolidinium	C151_A14	0.035	212.45	58.09	1.345	8.25	0.108	0	8.25	0.515	22.66	1.91	0.197	0.209	0.014	0	0.88	1	0	0.005	1.2517	79.5978	11.9484	0.349432	8.10433	not readily biodegradable	0.708497	0.890943	0.563103	0.887992	0.41245	-1.34476	1.04418
pyrrolidinium	C151_A55	0.035	212.45	62.01	2.925	8.25	0.108	0	8.25	0.515	22.66	1.91	0.197	0.209	0.013	0	0.88	0	0	0.005	1.214	79.6052	11.9496	0.349464	8.09575	not readily biodegradable	0.721762	0.890943	0.532902	0.887992	0.412165	-0.870649	1.29117
piperidinium	C261_A66	0.035	212.45	135.11	14.945	8.25	0.101	0.139	8.25	0.365	22.66	1.91	0.197	0.266	-0.172	0.133	1.061	0	0	0.006	2.622	75.8368	15.677	0.395137	8.09115	not readily biodegradable	0.22635	0.904773	0.396269	0.966388	0.42413	-1.57515	1.16291
piperazinium	C875_A7	0.057	213.44	149.08	7.722	8.45	0.082	0.609	8.583	0.243	22.155	1.873	0.199	0.188	-0.055	0	0.97	0	0	0.008	2.254	77.1785	13.5834	1.20558	8.03252	not readily biodegradable	0.401211	0.993404	0.635016	0.926973	0.417911	-0.923358	1.43729
piperazinium	C379_A52	0.034	144.28	114.89	7.848	4.833	0.068	1.55	5.75	0	14.015	1.866	0.233	0.202	0.328	0.127	0.348	0	0	0.004	2.673	86.5734	5.0737	0.335014	8.01785	not readily biodegradable	0.985233	0.88076	0.665317	0.657568	0.389393	-0.714524	1.75532
piperazinium	C867_A65	0.025	185.38	124.16	12.137	6.7	0.088	0.435	6.833	0.357	19.101	1.956	0.2	0.18	0.403	0.12	0.771	0	1	0.007	1.98	81.7665	10.1227	0.100091	8.01077	not readily biodegradable	0.772047	0.78785	0.47481	0.840781	0.402985	-1.23753	1.41612
piperazinium	C864_A45	0.031	143.29	74.07	8.231	5.2	0.084	0.039	5.333	0.072	14.521	1.943	0.19	0.209	-0.012	0.166	0.288	0	1	0.008	5.2808	87.3917	4.6062	0.00255028	7.99957	not readily biodegradable	0.0221971	0.486232	0.707478	0.63158	0.386604	-0.814892	1.76105
imidazolium	C66_A14	0.04	237.46	58.09	1.345	8.4	0.057	0	9.167	0.304	24.155	1.933	0.185	0.195	0.014	0	1.038	1	0	0.01	1.2517	76.7479	15.2331	0.0211629	7.99782	not readily biodegradable	0.574158	0.667532	0.769632	0.956426	0.418227	-0.653363	0.715102
imidazolium	C66_A55	0.04	237.46	62.01	2.925	8.4	0.057	0	9.167	0.304	24.155	1.933	0.185	0.195	0.013	0	1.038	0	0	0.01	1.214	76.7549	15.2345	0.0211648	7.98941	not readily biodegradable	0.587423	0.667532	0.739432	0.956426	0.417941	-0.179248	0.962092
piperazinium	C867_A54	0.025	185.38	162.16	11.879	6.7	0.088	0.311	6.833	0.357	19.101	1.956	0.2	0.18	0.4	0.091	0.771	1	1	0.007	2.792	81.8224	10.1296	0.059875	7.98817	not readily biodegradable	0.486341	0.746317	0.479741	0.840781	0.402129	-1.28522	1.50742
piperazinium	C862_A15	0.037	115.23	95.11	7.497	4.2	0.086	0.538	4.333	0	11.467	1.929	0.207	0.181	0.291	0	0.002	0	0	0.005	4.4469	89.1833	2.83508	0.00669738	7.97491	not readily biodegradable	0.590037	0.562534	0.693048	0.507706	0.381061	-0.561493	2.11935
piperazinium	C865_A66	0.029	157.32	135.11	14.945	5.7	0.081	0.139	5.833	0.213	16.047	1.948	0.184	0.235	-0.172	0.133	0.525	0	0	0.01	2.622	85.2012	6.8279	0.00588578	7.96501	not readily biodegradable	0.820585	0.555794	0.553418	0.734232	0.391637	-1.06321	1.73047
piperidinium	C294_A14	0.029	254.54	58.09	1.345	9.75	0.097	0	9.75	0.37	27.24	1.924	0.191	0.21	0.014	0	1.064	1	0	0.01	1.2517	75.3068	15.6502	1.1249	7.91808	not readily biodegradable	0.296944	0.989794	0.737909	0.967687	0.420461	-1.62238	0.610142
piperidinium	C294_A55	0.029	254.54	62.01	2.925	9.75	0.097	0	9.75	0.37	27.24	1.924	0.191	0.21	0.013	0	1.064	0	0	0.01	1.214	75.3136	15.6516	1.125	7.90978	not readily biodegradable	0.310209	0.989794	0.707709	0.967687	0.420176	-1.14827	0.857131
imidazolium	C9_A66	0.043	223.43	135.11	14.945	7.9	0.071	0.139	8.667	0.577	22.628	1.929	0.19	0.25	-0.172	0.133	0.976	0	0	0.005	2.622	78.1753	13.9056	0.0464192	7.87268	not readily biodegradable	0.229225	0.72945	0.273349	0.929572	0.40974	-0.736914	0.956718
piperidinium	C291_A33	0.035	212.45	45.02	2.927	8.25	0.094	0	8.25	0.144	22.66	1.91	0.186	0.176	-0.03	0	1.061	0	0	0.01	1.42	76.2288	15.758	0.148744	7.86448	not readily biodegradable	0.649279	0.825489	0.816298	0.966388	0.415728	-1.14146	1.10547
piperazinium	C866_A7	0.027	171.35	149.08	7.722	6.2	0.085	0.609	6.333	0.309	17.574	1.953	0.179	0.193	-0.055	0	0.668	0	0	0.008	2.254	83.4317	8.60929	0.0950038	7.86404	not readily biodegradable	0.812853	0.782012	0.603293	0.796169	0.393615	-0.656703	1.87169
imidazolium	C39_A33	0.043	223.43	45.02	2.927	7.9	0.056	0	8.667	0.309	22.628	1.929	0.19	0.214	-0.03	0	0.977	0	0	0.008	1.42	78.1932	13.9334	0.0109402	7.86246	not readily biodegradable	0.652155	0.612764	0.694945	0.930005	0.409363	-0.303218	0.899273
piperazinium	C864_A8	0.031	143.29	66.05	4.324	5.2	0.084	0	5.333	0.072	14.521	1.943	0.19	0.209	-0.031	0.131	0.288	2	0	0.008	5.1256	87.5504	4.61456	0.00217319	7.83288	not readily biodegradable	0.076805	0.47317	0.782158	0.63158	0.381181	-0.718316	1.78468
pyrrolidinium	C173_A66	0.033	226.48	135.11	14.945	8.75	0.101	0.139	8.75	0.351	24.187	1.915	0.177	0.181	-0.172	0.133	1.089	0	0	0.005	2.622	75.1639	16.3264	0.728413	7.78128	not readily biodegradable	0.0891359	0.954866	0.381976	0.978516	0.416582	-1.65898	1.01396
pyrrolidinium	C134_A24	0.035	212.45	152.03	12.595	8.25	0.092	0.531	8.25	0.096	22.66	1.91	0.176	0.186	-0.242	0.159	1.061	0	0	0.01	2.718	75.4517	15.5974	1.18726	7.76367	not readily biodegradable	0.192572	0.993994	0.654573	0.966388	0.415067	-1.04955	1.47476
piperidinium	C262_A14	0.033	226.48	58.09	1.345	8.75	0.102	0	8.75	0.478	24.187	1.915	0.191	0.191	0.014	0	1.064	1	0	0.005	1.2517	76.0056	15.7954	0.438418	7.7606	not readily biodegradable	0.571283	0.912984	0.580887	0.967687	0.413154	-1.42859	0.895225
piperidinium	C272_A66	0.035	212.45	135.11	14.945	8.25	0.099	0.139	8.25	0.312	22.66	1.91	0.186	0.209	-0.172	0.133	1.061	0	0	0.008	2.622	76.1454	15.7408	0.353351	7.76052	not readily biodegradable	0.22635	0.895423	0.463789	0.966388	0.412696	-1.57515	1.16291
piperidinium	C262_A55	0.033	226.48	62.01	2.925	8.75	0.102	0	8.75	0.478	24.187	1.915	0.191	0.191	0.013	0	1.064	0	0	0.005	1.214	76.0124	15.7968	0.438457	7.75236	not readily biodegradable	0.584548	0.912984	0.550686	0.967687	0.412868	-0.954475	1.14222
morpholinium	C849_A65	0.064	244.45	124.16	12.137	8.583	0.065	0.435	9.25	0.262	24.09	1.92	0.228	0.257	0.403	0.12	1.064	0	1	0.006	1.98	76.1771	15.831	0.25472	7.73717	not readily biodegradable	0.323743	0.868969	0.499449	0.967687	0.411847	-1.00091	0.624723
pyrrolidinium	C151_A33	0.035	212.45	45.02	2.927	8.25	0.108	0	8.25	0.515	22.66	1.91	0.197	0.209	-0.03	0	0.88	0	0	0.005	1.42	79.921	11.997	0.350851	7.73119	not readily biodegradable	0.649279	0.890943	0.532864	0.887992	0.399892	-1.14146	1.10547
piperazinium	C379_A27	0.034	144.28	59.05	6.313	4.833	0.068	0.027	5.75	0	14.015	1.866	0.233	0.202	0.292	0	0.348	0	0	0.004	2.801	87.1611	5.10815	0.000607512	7.73011	not readily biodegradable	0.940195	0.37064	0.694657	0.657568	0.379119	-0.510834	1.68741
piperazinium	C379_A15	0.034	144.28	95.11	7.497	4.833	0.068	0.538	5.75	0	14.015	1.866	0.233	0.202	0.291	0	0.348	0	0	0.004	4.4469	87.1654	5.1084	0.00506289	7.72112	not readily biodegradable	0.361077	0.541797	0.672026	0.657568	0.378833	-0.519844	1.79203
morpholinium	C849_A54	0.064	244.45	162.16	11.879	8.583	0.065	0.311	9.25	0.262	24.09	1.92	0.228	0.257	0.4	0.091	1.064	1	1	0.006	2.792	76.2756	15.8515	0.152467	7.7204	not readily biodegradable	0.0380369	0.827436	0.504381	0.967687	0.410991	-1.0486	0.716022
imidazolium	C66_A33	0.04	237.46	45.02	2.927	8.4	0.057	0	9.167	0.304	24.155	1.933	0.185	0.195	-0.03	0	1.038	0	0	0.01	1.42	77.0529	15.2937	0.021247	7.63223	not readily biodegradable	0.514941	0.667532	0.739393	0.956426	0.405669	-0.450057	0.776391
morpholinium	C848_A24	0.067	230.42	152.03	12.595	8.083	0.063	0.531	8.75	0.199	22.563	1.915	0.172	0.166	-0.242	0.159	1.012	0	0	0.007	2.718	77.5044	14.6922	0.184821	7.61864	not readily biodegradable	0.201288	0.84168	0.541999	0.945165	0.403802	-0.373851	1.10161
piperidinium	C294_A33	0.029	254.54	45.02	2.927	9.75	0.097	0	9.75	0.37	27.24	1.924	0.191	0.21	-0.03	0	1.064	0	0	0.01	1.42	75.6021	15.7116	1.12931	7.557	not readily biodegradable	0.237727	0.989794	0.70767	0.967687	0.407903	-1.41908	0.671431
piperazinium	C872_A24	0.07	171.35	152.03	12.595	6.95	0.081	0.531	7.083	0.074	17.574	1.843	0.208	0.208	-0.242	0.159	0.859	0	0	0.009	2.718	80.6696	11.668	0.133722	7.52869	not readily biodegradable	0.649592	0.812324	0.644125	0.878896	0.391233	-0.622916	1.89738
piperazinium	C863_A31	0.034	129.26	96.1	6.665	4.7	0.085	0.498	4.833	0	12.994	1.937	0.208	0.219	0.15	0	0.002	0	0	0.006	4.5554	89.6142	2.84878	0.0100061	7.52697	not readily biodegradable	0.414647	0.594554	0.729973	0.507706	0.366453	-0.577264	2.04817
imidazolium	C434_A70	0.043	223.43	120.17	11.655	7.9	0.053	0.092	8.667	0.296	22.628	1.929	0.201	0.214	0.109	0.13	0.97	0	2	0.01	1.852	78.6628	13.8446	0.0135503	7.47902	not readily biodegradable	0.500154	0.629553	0.57641	0.926973	0.395703	-0.775644	0.892316
pyridinium	C210_A4	0.027	178.33	125.14	10.406	6.283	0.045	0.416	7.167	0.11	18.026	1.913	0.241	0.231	0.562	0.13	0.552	0	0	0.011	2	85.3577	7.17487	0.00476962	7.46271	not readily biodegradable	0.861608	0.538672	0.710707	0.745926	0.375764	0.0823733	1.3184
piperidinium	C262_A33	0.033	226.48	45.02	2.927	8.75	0.102	0	8.75	0.478	24.187	1.915	0.191	0.191	-0.03	0	1.064	0	0	0.005	1.42	76.3008	15.8567	0.440121	7.40237	not readily biodegradable	0.512065	0.912984	0.550648	0.967687	0.400596	-1.22528	0.956515
piperazinium	C865_A24	0.029	157.32	152.03	12.595	5.7	0.081	0.531	5.833	0.213	16.047	1.948	0.184	0.235	-0.242	0.159	0.525	0	0	0.01	2.718	85.7344	6.87062	0.0301229	7.36487	not readily biodegradable	0.786806	0.687092	0.598337	0.734232	0.371659	-0.537608	2.04232
pyridinium	C210_A28	0.027	178.33	171.21	14.741	6.283	0.045	0.297	7.167	0.11	18.026	1.913	0.241	0.231	0.547	0.09	0.552	0	0	0.011	3.092	85.4753	7.18476	0.00291503	7.33706	not readily biodegradable	0.477383	0.498813	0.627847	0.745926	0.371483	-0.182267	1.32652
piperazinium	C863_A12	0.034	129.26	97.08	5.555	4.7	0.085	0.493	4.833	0	12.994	1.937	0.208	0.219	0.121	0	0.002	0	0	0.006	4.6173	89.8546	2.85642	0.00982695	7.27911	not readily biodegradable	0.392867	0.592879	0.75119	0.507706	0.358176	-0.429269	2.12454
piperazinium	C867_A62	0.025	185.38	121.12	10.465	6.7	0.088	0	6.833	0.357	19.101	1.956	0.2	0.18	0.308	0.085	0.771	0	0	0.007	2.513	82.5443	10.219	0.0166203	7.22007	not readily biodegradable	0.584509	0.642149	0.506769	0.840781	0.375871	-1.32527	1.36341
piperazinium	C875_A66	0.057	213.44	135.11	14.945	8.45	0.082	0.139	8.583	0.243	22.155	1.873	0.199	0.188	-0.172	0.133	0.97	0	0	0.008	2.622	78.8047	13.8696	0.175111	7.15053	not readily biodegradable	0.271729	0.83598	0.496954	0.926973	0.384518	-1.41517	1.15113
imidazolium	C434_A56	0.043	223.43	90.07	5.196	7.9	0.053	0	8.667	0.296	22.628	1.929	0.201	0.214	0.064	0.116	0.97	0	3	0.01	2.146	78.9751	13.8996	0.00928723	7.11602	not readily biodegradable	0.396708	0.598738	0.699869	0.926973	0.382859	-0.623801	0.876564
piperazinium	C867_A27	0.025	185.38	59.05	6.313	6.7	0.088	0.027	6.833	0.357	19.101	1.956	0.2	0.18	0.292	0	0.771	0	0	0.007	2.801	82.6584	10.2331	0.0186163	7.08984	not readily biodegradable	0.483175	0.651193	0.586131	0.840781	0.371305	-1.04203	1.3161
pyridinium	C210_A71	0.027	178.33	164.2	20.105	6.283	0.045	0.587	7.167	0.11	18.026	1.913	0.241	0.231	0.516	0.112	0.552	0	2	0.011	3.451	85.706	7.20416	0.00973632	7.08006	not readily biodegradable	0.351067	0.595947	0.525318	0.745926	0.362635	-0.220659	1.28628
imidazolium	C434_A67	0.043	223.43	197.65	2.652	7.9	0.053	0	8.667	0.296	22.628	1.929	0.201	0.214	0.057	0	0.97	0	0	0.01	0.863	79.0224	13.9079	0.0092928	7.06034	not readily biodegradable	0.848138	0.598738	0.748495	0.926973	0.380862	-0.69622	1.16609
pyrrolidinium	C172_A70	0.035	212.45	120.17	11.655	8.25	0.1	0.092	8.25	0.177	22.66	1.91	0.209	0.209	0.109	0.13	0.969	0	2	0.007	1.852	78.7849	13.8416	0.31876	7.05472	not readily biodegradable	0.497278	0.884356	0.57054	0.92654	0.381384	-1.61388	1.09851
piperazinium	C867_A53	0.025	185.38	111.11	8.56	6.7	0.088	0.455	6.833	0.357	19.101	1.956	0.2	0.18	0.286	0.163	0.771	0	0	0.007	1.673	82.6261	10.2291	0.109895	7.03495	not readily biodegradable	0.880067	0.794549	0.543181	0.840781	0.369593	-1.03899	1.4751
imidazolium	C434_A69	0.043	223.43	180.15	8.406	7.9	0.053	0.529	8.667	0.296	22.628	1.929	0.201	0.214	0.052	0.125	0.97	0	0	0.01	2.21	78.9975	13.9035	0.0834195	7.01551	not readily biodegradable	0.37419	0.775923	0.638512	0.926973	0.379435	-0.387999	1.26601
morpholinium	C849_A62	0.064	244.45	121.12	10.465	8.583	0.065	0	9.25	0.262	24.09	1.92	0.228	0.257	0.308	0.085	1.064	0	0	0.006	2.513	76.9711	15.9961	0.0423347	6.99049	not readily biodegradable	0.136204	0.723268	0.531408	0.967687	0.384733	-1.08865	0.572012
piperidinium	C273_A66	0.033	226.48	135.11	14.945	8.75	0.1	0.139	8.75	0.322	24.187	1.915	0.197	0.238	-0.172	0.133	1.064	0	0	0.005	2.622	76.4731	15.8926	0.699397	6.93497	not readily biodegradable	0.0891359	0.950191	0.395915	0.967687	0.384382	-1.65898	1.01396
piperazinium	C865_A17	0.029	157.32	301.01	23.151	5.7	0.081	0.771	5.833	0.213	16.047	1.948	0.184	0.235	-0.296	0.087	0.525	0	0	0.01	4.88	86.102	6.90008	0.0818908	6.91604	not readily biodegradable	0.0260964	0.767479	0.396567	0.734232	0.356247	-1.02128	2.25312
piperazinium	C866_A66	0.027	171.35	135.11	14.945	6.2	0.085	0.139	6.333	0.309	17.574	1.953	0.179	0.193	-0.172	0.133	0.668	0	0	0.008	2.622	84.3816	8.70731	0.0136684	6.89745	not readily biodegradable	0.683371	0.624588	0.465231	0.796169	0.360223	-1.14852	1.58553
morpholinium	C849_A27	0.064	244.45	59.05	6.313	8.583	0.065	0.027	9.25	0.262	24.09	1.92	0.228	0.257	0.292	0	1.064	0	0	0.006	2.801	77.0703	16.0167	0.0474144	6.86567	not readily biodegradable	0.0348702	0.732312	0.610771	0.967687	0.380167	-0.805414	0.524711
morpholinium	C849_A49	0.064	244.45	95.11	7.497	8.583	0.065	0.538	9.25	0.262	24.09	1.92	0.228	0.257	0.291	0	1.064	0	0	0.006	1.258	76.8096	15.9625	0.393786	6.83416	not readily biodegradable	0.577782	0.903468	0.588139	0.967687	0.379882	-0.814424	0.629327
morpholinium	C849_A53	0.064	244.45	111.11	8.56	8.583	0.065	0.455	9.25	0.262	24.09	1.92	0.228	0.257	0.286	0.163	1.064	0	0	0.006	1.673	76.9296	15.9874	0.279494	6.80346	not readily biodegradable	0.431762	0.875668	0.567821	0.967687	0.378454	-0.802374	0.683705
piperidinium	C260_A57	0.038	198.42	96.07	4.388	7.75	0.1	0.517	7.75	0.276	21.133	1.903	0.224	0.231	0.208	0	0.954	0	0	0.008	1.303	78.7287	13.4698	0.998859	6.80271	not readily biodegradable	0.82766	0.976614	0.682881	0.920043	0.373019	-0.930139	1.49312
piperazinium	C862_A31	0.037	115.23	96.1	6.665	4.2	0.086	0.498	4.333	0	11.467	1.929	0.207	0.181	0.15	0	0.002	0	0	0.005	4.5554	90.349	2.87214	0.00574731	6.77313	not readily biodegradable	0.551861	0.549136	0.708951	0.507706	0.340819	-0.453602	2.17585
pyridinium	C219_A66	0.029	164.3	135.11	14.945	6.2	0.042	0.139	7	0.146	16.499	1.861	0.206	0.169	-0.172	0.133	0.472	0	0	0.008	2.622	86.9242	6.34291	0.0011669	6.73171	not readily biodegradable	0.779968	0.423551	0.543577	0.711276	0.348033	0.190406	1.43585
imidazolium	C434_A14	0.043	223.43	58.09	1.345	7.9	0.053	0	8.667	0.296	22.628	1.929	0.201	0.214	0.014	0	0.97	1	0	0.01	1.2517	79.309	13.9584	0.0093265	6.72332	not readily biodegradable	0.711372	0.598738	0.773477	0.926973	0.368589	-0.506524	0.837984
piperidinium	C291_A66	0.035	212.45	135.11	14.945	8.25	0.094	0.139	8.25	0.144	22.66	1.91	0.186	0.176	-0.172	0.133	1.061	0	0	0.01	2.622	77.0765	15.9332	0.267744	6.72248	not readily biodegradable	0.22635	0.872046	0.586583	0.966388	0.3752	-1.57515	1.16291
imidazolium	C39_A66	0.043	223.43	135.11	14.945	7.9	0.056	0.139	8.667	0.309	22.628	1.929	0.19	0.214	-0.172	0.133	0.977	0	0	0.008	2.622	79.1575	14.1052	0.0197163	6.71761	not readily biodegradable	0.229225	0.659321	0.465231	0.930005	0.368835	-0.736914	0.956718
imidazolium	C434_A55	0.043	223.43	62.01	2.925	7.9	0.053	0	8.667	0.296	22.628	1.929	0.201	0.214	0.013	0	0.97	0	0	0.01	1.214	79.3156	13.9595	0.00932727	6.71558	not readily biodegradable	0.724637	0.598738	0.743277	0.926973	0.368304	-0.0324089	1.08497
pyrrolidinium	C172_A56	0.035	212.45	90.07	5.196	8.25	0.1	0	8.25	0.177	22.66	1.91	0.209	0.209	0.064	0.116	0.969	0	3	0.007	2.146	79.1636	13.9082	0.218657	6.70959	not readily biodegradable	0.393833	0.853541	0.693999	0.92654	0.368541	-1.46204	1.08276
piperazinium	C867_A63	0.025	185.38	87.06	8.284	6.7	0.088	0.482	6.833	0.357	19.101	1.956	0.2	0.18	0.245	0.152	0.771	0	0	0.007	1.495	82.9053	10.2637	0.123338	6.70772	not readily biodegradable	0.942697	0.803593	0.548457	0.840781	0.357891	-1.0746	1.38469
piperidinium	C271_A24	0.038	198.42	152.03	12.595	7.75	0.097	0.531	7.75	0.214	21.133	1.903	0.192	0.204	-0.242	0.159	0.951	0	0	0.011	2.718	78.962	13.4382	0.892398	6.70737	not readily biodegradable	0.329786	0.967278	0.618878	0.918744	0.369054	-0.990386	1.63253
piperazinium	C868_A4	0.023	199.41	125.14	10.406	7.2	0.09	0.416	7.333	0.46	20.628	1.959	0.22	0.194	0.562	0.13	0.873	0	0	0.005	2	81.0897	12.0227	0.191582	6.69609	not readily biodegradable	0.627796	0.84093	0.416345	0.88496	0.362545	-1.29379	1.30959
piperazinium	C867_A64	0.025	185.38	132.08	11.425	6.7	0.088	0.344	6.833	0.357	19.101	1.956	0.2	0.18	0.243	0.131	0.771	0	0	0.007	2.425	82.9639	10.2709	0.0696191	6.6956	not readily biodegradable	0.615472	0.75737	0.488419	0.840781	0.35732	-1.16408	1.4765
pyrrolidinium	C172_A67	0.035	212.45	197.65	2.652	8.25	0.1	0	8.25	0.177	22.66	1.91	0.209	0.209	0.057	0	0.969	0	0	0.007	0.863	79.2094	13.9162	0.218783	6.65563	not readily biodegradable	0.845263	0.853541	0.742626	0.92654	0.366543	-1.53446	1.37229
piperazinium	C864_A66	0.031	143.29	135.11	14.945	5.2	0.084	0.139	5.333	0.072	14.521	1.943	0.19	0.209	-0.172	0.133	0.288	0	0	0.008	2.622	88.6714	4.67365	0.00391833	6.65099	not readily biodegradable	0.957709	0.519727	0.579145	0.63158	0.340939	-0.965457	1.87103
piperazinium	C868_A28	0.023	199.41	171.21	14.741	7.2	0.09	0.297	7.333	0.46	20.628	1.959	0.22	0.194	0.547	0.09	0.873	0	0	0.005	3.092	81.2515	12.0467	0.117161	6.58472	not readily biodegradable	0.243571	0.801071	0.333484	0.88496	0.358264	-1.55843	1.31771
piperazinium	C872_A3	0.07	171.35	280.17	17.864	6.95	0.081	0.792	7.083	0.074	17.574	1.843	0.208	0.208	-0.358	0.071	0.859	0	2	0.009	4.087	81.266	11.7543	0.397853	6.58189	not readily biodegradable	0.167903	0.899745	0.543412	0.878896	0.358126	-1.07145	2.06256
pyrrolidinium	C151_A66	0.035	212.45	135.11	14.945	8.25	0.108	0.139	8.25	0.515	22.66	1.91	0.197	0.209	-0.172	0.133	0.88	0	0	0.005	2.622	80.6868	12.1119	0.630583	6.57066	not readily biodegradable	0.22635	0.9375	0.303149	0.887992	0.359365	-1.57515	1.16291
pyrrolidinium	C164_A56	0.031	240.51	90.07	5.196	9.25	0.106	0	9.25	0.668	25.714	1.92	0.201	0.196	0.064	0.116	1.135	0	3	0.005	2.146	74.7992	17.6237	1.0117	6.56546	not readily biodegradable	0.119405	0.981778	0.415954	0.998439	0.376688	-1.65583	0.797677
piperazinium	C862_A79	0.037	115.23	200.73	4.223	4.2	0.086	0.575	4.333	0	11.467	1.929	0.207	0.181	0.124	0	0.002	0	0	0.005	3.5528	90.5514	2.87857	0.00792848	6.56215	not readily biodegradable	0.90463	0.574927	0.755628	0.507706	0.333398	-0.661171	2.38943
piperazinium	C875_A24	0.057	213.44	152.03	12.595	8.45	0.082	0.531	8.583	0.243	22.155	1.873	0.199	0.188	-0.242	0.159	0.97	0	0	0.008	2.718	78.703	13.8517	0.889481	6.55576	not readily biodegradable	0.23795	0.967278	0.541872	0.926973	0.36454	-0.88957	1.46297
piperazinium	C379_A31	0.034	144.28	96.1	6.665	4.833	0.068	0.498	5.75	0	14.015	1.866	0.233	0.202	0.15	0	0.348	0	0	0.004	4.5554	88.2717	5.17323	0.00434306	6.55074	not readily biodegradable	0.322901	0.528399	0.687929	0.657568	0.338591	-0.411953	1.84853
piperidinium	C281_A57	0.038	198.42	96.07	4.388	7.75	0.094	0.517	7.75	0.123	21.133	1.903	0.217	0.192	0.208	0	0.95	0	0	0.012	1.303	79.2732	13.4674	0.710525	6.54891	not readily biodegradable	0.82766	0.948562	0.84051	0.918311	0.362644	-0.930139	1.49312
piperazinium	C862_A12	0.037	115.23	97.08	5.555	4.2	0.086	0.493	4.333	0	11.467	1.929	0.207	0.181	0.121	0	0.002	0	0	0.005	4.6173	90.5768	2.87938	0.0056435	6.53818	not readily biodegradable	0.530081	0.547462	0.730168	0.507706	0.332542	-0.305607	2.25221
pyrrolidinium	C164_A67	0.031	240.51	197.65	2.652	9.25	0.106	0	9.25	0.668	25.714	1.92	0.201	0.196	0.057	0	1.135	0	0	0.005	0.863	74.841	17.6335	1.01227	6.51328	not readily biodegradable	0.570835	0.981778	0.46458	0.998439	0.37469	-1.72825	1.0872
imidazolium	C66_A66	0.04	237.46	135.11	14.945	8.4	0.057	0.139	9.167	0.304	24.155	1.933	0.185	0.195	-0.172	0.133	1.038	0	0	0.01	2.622	77.9734	15.4764	0.0382765	6.512	not readily biodegradable	0.0920114	0.714089	0.509679	0.956426	0.365141	-0.883753	0.833836
morpholinium	C849_A63	0.064	244.45	87.06	8.284	8.583	0.065	0.482	9.25	0.262	24.09	1.92	0.228	0.257	0.245	0.152	1.064	0	0	0.006	1.495	77.1614	16.0356	0.313569	6.48945	not readily biodegradable	0.494393	0.884711	0.573097	0.967687	0.366753	-0.837983	0.593292
morpholinium	C849_A64	0.064	244.45	132.08	11.425	8.583	0.065	0.344	9.25	0.262	24.09	1.92	0.228	0.257	0.243	0.131	1.064	0	0	0.006	2.425	77.2794	16.0601	0.177142	6.4833	not readily biodegradable	0.167168	0.838489	0.513059	0.967687	0.366182	-0.927464	0.685104
piperazinium	C865_A3	0.029	157.32	280.17	17.864	5.7	0.081	0.792	5.833	0.213	16.047	1.948	0.184	0.235	-0.358	0.071	0.525	0	2	0.01	4.087	86.5521	6.93615	0.0898135	6.42197	not readily biodegradable	0.305117	0.774512	0.497624	0.734232	0.338551	-0.986146	2.20751
imidazolium	C434_A33	0.043	223.43	45.02	2.927	7.9	0.053	0	8.667	0.296	22.628	1.929	0.201	0.214	-0.03	0	0.97	0	0	0.01	1.42	79.5947	14.0087	0.0093601	6.38728	not readily biodegradable	0.652155	0.598738	0.743239	0.926973	0.356031	-0.303218	0.899273
piperazinium	C379_A79	0.034	144.28	200.73	4.223	4.833	0.068	0.575	5.75	0	14.015	1.866	0.233	0.202	0.124	0	0.348	0	0	0.004	3.5528	88.4641	5.18451	0.00599094	6.34544	not readily biodegradable	0.675671	0.55419	0.734606	0.657568	0.33117	-0.619522	2.06211
piperazinium	C866_A24	0.027	171.35	152.03	12.595	6.2	0.085	0.531	6.333	0.309	17.574	1.953	0.179	0.193	-0.242	0.159	0.668	0	0	0.008	2.718	84.8331	8.75391	0.0698908	6.34307	not readily biodegradable	0.649592	0.755886	0.510149	0.796169	0.340244	-0.622916	1.89738
piperazinium	C868_A71	0.023	199.41	164.2	20.105	7.2	0.09	0.587	7.333	0.46	20.628	1.959	0.22	0.194	0.516	0.112	0.873	0	2	0.005	3.451	81.2353	12.0443	0.39019	6.33021	not readily biodegradable	0.117255	0.898205	0.230956	0.88496	0.349417	-1.59682	1.27746
pyrrolidinium	C172_A14	0.035	212.45	58.09	1.345	8.25	0.1	0	8.25	0.177	22.66	1.91	0.209	0.209	0.014	0	0.969	1	0	0.007	1.2517	79.4865	13.9649	0.219548	6.32911	not readily biodegradable	0.708497	0.853541	0.767608	0.92654	0.35427	-1.34476	1.04418
piperazinium	C379_A12	0.034	144.28	97.08	5.555	4.833	0.068	0.493	5.75	0	14.015	1.866	0.233	0.202	0.121	0	0.348	0	0	0.004	4.6173	88.4878	5.18589	0.0042643	6.32208	not readily biodegradable	0.301121	0.526724	0.709145	0.657568	0.330314	-0.263958	1.92489
pyrrolidinium	C172_A55	0.035	212.45	62.01	2.925	8.25	0.1	0	8.25	0.177	22.66	1.91	0.209	0.209	0.013	0	0.969	0	0	0.007	1.214	79.4928	13.966	0.219566	6.32161	not readily biodegradable	0.721762	0.853541	0.737407	0.92654	0.353985	-0.870649	1.29117
piperazinium	C863_A1	0.034	129.26	86.81	7.182	4.7	0.085	0.553	4.833	0	12.994	1.937	0.208	0.219	0	0	0.002	0	0	0.006	5.4245	90.8107	2.88681	0.012739	6.28976	not readily biodegradable	0.10885	0.612976	0.720091	0.507706	0.323642	-0.14459	2.23465
piperidinium	C262_A66	0.033	226.48	135.11	14.945	8.75	0.102	0.139	8.75	0.478	24.187	1.915	0.191	0.191	-0.172	0.133	1.064	0	0	0.005	2.622	76.9365	15.9889	0.790048	6.28463	not readily biodegradable	0.0891359	0.959542	0.320933	0.967687	0.360068	-1.65898	1.01396
morpholinium	C849_A57	0.064	244.45	96.07	4.388	8.583	0.065	0.517	9.25	0.262	24.09	1.92	0.228	0.257	0.208	0	1.064	0	0	0.006	1.303	77.3501	16.0748	0.363466	6.21158	not readily biodegradable	0.561949	0.896434	0.647566	0.967687	0.356193	-0.423571	0.82607
pyrrolidinium	C164_A14	0.031	240.51	58.09	1.345	9.25	0.106	0	9.25	0.668	25.714	1.92	0.201	0.196	0.014	0	1.135	1	0	0.005	1.2517	75.0937	17.6931	1.01568	6.19751	not readily biodegradable	0.434069	0.981778	0.489563	0.998439	0.362418	-1.53856	0.759096
piperazinium	C863_A45	0.034	129.26	74.07	8.231	4.7	0.085	0.039	4.833	0	12.994	1.937	0.208	0.219	-0.012	0.166	0.002	0	1	0.006	5.2808	90.9121	2.89004	0.00151144	6.19632	not readily biodegradable	0.159411	0.440815	0.700041	0.507706	0.320217	-0.729584	1.90599
pyrrolidinium	C164_A55	0.031	240.51	62.01	2.925	9.25	0.106	0	9.25	0.668	25.714	1.92	0.201	0.196	0.013	0	1.135	0	0	0.005	1.214	75.0995	17.6944	1.01576	6.19027	not readily biodegradable	0.447333	0.981778	0.459362	0.998439	0.362132	-1.06444	1.00609
pyridinium	C210_A65	0.027	178.33	124.16	12.137	6.283	0.045	0.435	7.167	0.11	18.026	1.913	0.241	0.231	0.403	0.12	0.552	0	1	0.011	1.98	86.5362	7.27394	0.00523211	6.18465	not readily biodegradable	0.868645	0.545036	0.677621	0.745926	0.330384	0.0286699	1.2888
pyridinium	C210_A54	0.027	178.33	162.16	11.879	6.283	0.045	0.311	7.167	0.11	18.026	1.913	0.241	0.231	0.4	0.091	0.552	1	1	0.011	2.792	86.5592	7.27587	0.00312856	6.16184	not readily biodegradable	0.582939	0.503503	0.682552	0.745926	0.329528	-0.0190268	1.3801
piperazinium	C864_A24	0.031	143.29	152.03	12.595	5.2	0.084	0.531	5.333	0.072	14.521	1.943	0.19	0.209	-0.242	0.159	0.288	0	0	0.008	2.718	89.1799	4.70045	0.0200433	6.09957	not readily biodegradable	0.923931	0.651025	0.624064	0.63158	0.32096	-0.439856	2.18288
piperazinium	C863_A8	0.034	129.26	66.05	4.324	4.7	0.085	0	4.833	0	12.994	1.937	0.208	0.219	-0.031	0.131	0.002	2	0	0.006	5.1256	91.0554	2.89459	0.00128765	6.04873	not readily biodegradable	0.214019	0.427752	0.77472	0.507706	0.314794	-0.633009	1.92962
pyrrolidinium	C172_A33	0.035	212.45	45.02	2.927	8.25	0.1	0	8.25	0.177	22.66	1.91	0.209	0.209	-0.03	0	0.969	0	0	0.007	1.42	79.7625	14.0134	0.220311	6.00377	not readily biodegradable	0.649279	0.853541	0.737369	0.92654	0.341712	-1.14146	1.10547
pyrrolidinium	C164_A33	0.031	240.51	45.02	2.927	9.25	0.106	0	9.25	0.668	25.714	1.92	0.201	0.196	-0.03	0	1.135	0	0	0.005	1.42	75.3456	17.7524	1.01909	5.88289	not readily biodegradable	0.374851	0.981778	0.459324	0.998439	0.34986	-1.33525	0.820386
pyrrolidinium	C163_A62	0.033	226.48	121.12	10.465	8.75	0.105	0	8.75	0.435	24.187	1.915	0.225	0.202	0.308	0.085	1.108	0	0	0.005	2.513	76.4647	17.1763	0.524763	5.83423	not readily biodegradable	0.127488	0.92701	0.427233	0.986745	0.344719	-1.73821	0.932345
piperazinium	C867_A79	0.025	185.38	200.73	4.223	6.7	0.088	0.575	6.833	0.357	19.101	1.956	0.2	0.18	0.124	0	0.771	0	0	0.007	3.5528	83.6709	10.3584	0.183095	5.78751	not readily biodegradable	0.21865	0.834742	0.62608	0.840781	0.323357	-1.15072	1.6908
pyrrolidinium	C163_A27	0.033	226.48	59.05	6.313	8.75	0.105	0.027	8.75	0.435	24.187	1.915	0.225	0.202	0.292	0	1.108	0	0	0.005	2.801	76.5084	17.1861	0.587307	5.71824	not readily biodegradable	0.0261539	0.936054	0.506595	0.986745	0.340153	-1.45498	0.885044
piperazinium	C864_A17	0.031	143.29	301.01	23.151	5.2	0.084	0.771	5.333	0.072	14.521	1.943	0.19	0.209	-0.296	0.087	0.288	0	0	0.008	4.88	89.5368	4.71926	0.0544732	5.68944	not readily biodegradable	0.163221	0.731412	0.422294	0.63158	0.305548	-0.923527	2.39369
piperazinium	C867_A70	0.025	185.38	120.17	11.655	6.7	0.088	0.092	6.833	0.357	19.101	1.956	0.2	0.18	0.109	0.13	0.771	0	2	0.007	1.852	83.9006	10.3869	0.0247457	5.68773	not readily biodegradable	0.817085	0.672964	0.484023	0.840781	0.319076	-1.28477	1.38062
piperidinium	C260_A69	0.038	198.42	180.15	8.406	7.75	0.1	0.529	7.75	0.276	21.133	1.903	0.224	0.231	0.052	0.125	0.954	0	0	0.008	2.21	79.664	13.6298	1.06232	5.64393	not readily biodegradable	0.508528	0.980633	0.60608	0.920043	0.328496	-1.16707	1.62997
piperazinium	C862_A1	0.037	115.23	86.81	7.182	4.2	0.086	0.553	4.333	0	11.467	1.929	0.207	0.181	0	0	0.002	0	0	0.005	5.4245	91.4818	2.90815	0.00731115	5.60279	not readily biodegradable	0.246064	0.567558	0.699069	0.507706	0.298008	-0.0209279	2.36233
pyridinium	C210_A52	0.027	178.33	114.89	7.848	6.283	0.045	1.55	7.167	0.11	18.026	1.913	0.241	0.231	0.328	0.127	0.552	0	0	0.011	2.673	86.5923	7.27865	0.534796	5.59428	not readily biodegradable	0.62481	0.918499	0.759601	0.745926	0.308979	0.0204725	1.25669
piperazinium	C863_A32	0.034	129.26	75.05	7.162	4.7	0.085	0.022	4.833	0	12.994	1.937	0.208	0.219	-0.094	0.186	0.002	0	0	0.006	5.3729	91.5172	2.90927	0.00141788	5.57209	not readily biodegradable	0.127005	0.435121	0.720474	0.507706	0.296814	-0.647593	1.94962
morpholinium	C849_A70	0.064	244.45	120.17	11.655	8.583	0.065	0.092	9.25	0.262	24.09	1.92	0.228	0.257	0.109	0.13	1.064	0	2	0.006	1.852	78.1685	16.2449	0.0629774	5.52365	not readily biodegradable	0.36878	0.754083	0.508662	0.967687	0.327938	-1.04815	0.589224
piperazinium	C868_A65	0.023	199.41	124.16	12.137	7.2	0.09	0.435	7.333	0.46	20.628	1.959	0.22	0.194	0.403	0.12	0.873	0	1	0.005	1.98	82.1017	12.1727	0.209884	5.51572	not readily biodegradable	0.634833	0.847294	0.383258	0.88496	0.317166	-1.34749	1.27999
piperazinium	C862_A45	0.037	115.23	74.07	8.231	4.2	0.086	0.039	4.333	0	11.467	1.929	0.207	0.181	-0.012	0.166	0.002	0	1	0.005	5.2808	91.5737	2.91107	0.000867349	5.51435	not readily biodegradable	0.296625	0.395397	0.679018	0.507706	0.294583	-0.605922	2.03367
pyrrolidinium	C150_A55	0.038	198.42	62.01	2.925	7.75	0.106	0	7.75	0.409	21.133	1.903	0.217	0.198	0.013	0	0.807	0	0	0.006	1.214	83.3226	10.9932	0.175153	5.50907	not readily biodegradable	0.858976	0.8315	0.604874	0.856374	0.313807	-0.811482	1.44894
piperazinium	C868_A54	0.023	199.41	162.16	11.879	7.2	0.09	0.311	7.333	0.46	20.628	1.959	0.22	0.194	0.4	0.091	0.873	1	1	0.005	2.792	82.1894	12.1857	0.125602	5.49924	not readily biodegradable	0.349127	0.805761	0.388189	0.88496	0.316309	-1.39519	1.37129
pyridinium	C210_A62	0.027	178.33	121.12	10.465	6.283	0.045	0	7.167	0.11	18.026	1.913	0.241	0.231	0.308	0.085	0.552	0	0	0.011	2.513	87.1908	7.32896	0.000867121	5.47938	not readily biodegradable	0.681107	0.399335	0.709579	0.745926	0.303271	-0.0590714	1.23609
piperazinium	C866_A3	0.027	171.35	280.17	17.864	6.2	0.085	0.792	6.333	0.309	17.574	1.953	0.179	0.193	-0.358	0.071	0.668	0	2	0.008	4.087	85.4952	8.82223	0.208026	5.47455	not readily biodegradable	0.167903	0.843307	0.409436	0.796169	0.307137	-1.07145	2.06256
piperidinium	C260_A55	0.038	198.42	62.01	2.925	7.75	0.1	0	7.75	0.276	21.133	1.903	0.224	0.231	0.013	0	0.954	0	0	0.008	1.214	80.6568	13.7997	0.119778	5.42377	not readily biodegradable	0.858976	0.803448	0.710845	0.920043	0.317365	-0.811482	1.44894
piperidinium	C281_A69	0.038	198.42	180.15	8.406	7.75	0.094	0.529	7.75	0.123	21.133	1.903	0.217	0.192	0.052	0.125	0.95	0	0	0.012	2.21	80.2058	13.6258	0.755585	5.41277	not readily biodegradable	0.508528	0.952582	0.76371	0.918311	0.318121	-1.16707	1.62997
piperazinium	C379_A1	0.034	144.28	86.81	7.182	4.833	0.068	0.553	5.75	0	14.015	1.866	0.233	0.202	0	0	0.348	0	0	0.004	5.4245	89.3461	5.2362	0.00552281	5.41219	not readily biodegradable	0.017104	0.546821	0.678047	0.657568	0.29578	0.0207213	2.03501
piperazinium	C862_A8	0.037	115.23	66.05	4.324	4.2	0.086	0	4.333	0	11.467	1.929	0.207	0.181	-0.031	0.131	0.002	2	0	0.005	5.1256	91.7087	2.91536	0.000738849	5.3752	not readily biodegradable	0.351233	0.382334	0.753697	0.507706	0.28916	-0.509347	2.0573
piperazinium	C867_A56	0.025	185.38	90.07	5.196	6.7	0.088	0	6.833	0.357	19.101	1.956	0.2	0.18	0.064	0.116	0.771	0	3	0.007	2.146	84.1924	10.423	0.0169521	5.36759	not readily biodegradable	0.713639	0.642149	0.607482	0.840781	0.306232	-1.13292	1.36487
pyridinium	C210_A27	0.027	178.33	59.05	6.313	6.283	0.045	0.027	7.167	0.11	18.026	1.913	0.241	0.231	0.292	0	0.552	0	0	0.011	2.801	87.2964	7.33784	0.00097109	5.36481	not readily biodegradable	0.579772	0.408378	0.788942	0.745926	0.298704	0.224163	1.18879
imidazolium	C434_A66	0.043	223.43	135.11	14.945	7.9	0.053	0.139	8.667	0.296	22.628	1.929	0.201	0.214	-0.172	0.133	0.97	0	0	0.01	2.622	80.4594	14.1608	0.0168442	5.36291	not readily biodegradable	0.229225	0.645295	0.513524	0.926973	0.315504	-0.736914	0.956718
pyridinium	C210_A15	0.027	178.33	95.11	7.497	6.283	0.045	0.538	7.167	0.11	18.026	1.913	0.241	0.231	0.291	0	0.552	0	0	0.011	4.4469	87.2967	7.33786	0.00809251	5.35731	not readily biodegradable	0.000654614	0.579535	0.76631	0.745926	0.298419	0.215152	1.29341
piperazinium	C379_A45	0.034	144.28	74.07	8.231	4.833	0.068	0.039	5.75	0	14.015	1.866	0.233	0.202	-0.012	0.166	0.348	0	1	0.004	5.2808	89.432	5.24123	0.000655163	5.32611	not readily biodegradable	0.0676655	0.37466	0.657996	0.657568	0.292355	-0.564273	1.70635
pyridinium	C219_A3	0.029	164.3	280.17	17.864	6.2	0.042	0.792	7	0.146	16.499	1.861	0.206	0.169	-0.358	0.071	0.472	0	2	0.008	4.087	88.2224	6.43764	0.01779	5.32214	not readily biodegradable	0.264501	0.64227	0.487783	0.711276	0.294947	0.267469	1.91289
pyridinium	C210_A53	0.027	178.33	111.11	8.56	6.283	0.045	0.455	7.167	0.11	18.026	1.913	0.241	0.231	0.286	0.163	0.552	0	0	0.011	1.673	87.3316	7.34079	0.00573707	5.32191	not readily biodegradable	0.976665	0.551735	0.745992	0.745926	0.296992	0.227203	1.34779
piperazinium	C867_A69	0.025	185.38	180.15	8.406	6.7	0.088	0.529	6.833	0.357	19.101	1.956	0.2	0.18	0.052	0.125	0.771	0	0	0.007	2.21	84.1531	10.4181	0.152153	5.27656	not readily biodegradable	0.691121	0.819335	0.546125	0.840781	0.302807	-0.897123	1.75431
piperazinium	C864_A3	0.031	143.29	280.17	17.864	5.2	0.084	0.792	5.333	0.072	14.521	1.943	0.19	0.209	-0.358	0.071	0.288	0	2	0.008	4.087	89.9604	4.74159	0.0597138	5.23826	not readily biodegradable	0.442241	0.738445	0.523351	0.63158	0.287853	-0.888394	2.34807
morpholinium	C849_A56	0.064	244.45	90.07	5.196	8.583	0.065	0	9.25	0.262	24.09	1.92	0.228	0.257	0.064	0.116	1.064	0	3	0.006	2.146	78.438	16.3009	0.0431415	5.218	not readily biodegradable	0.265335	0.723268	0.632121	0.967687	0.315094	-0.896306	0.573473
piperazinium	C379_A8	0.034	144.28	66.05	4.324	4.833	0.068	0	5.75	0	14.015	1.866	0.233	0.202	-0.031	0.131	0.348	2	0	0.004	5.1256	89.5599	5.24873	0.000558074	5.19083	not readily biodegradable	0.122273	0.361597	0.732675	0.657568	0.286932	-0.467698	1.72998
piperidinium	C281_A55	0.038	198.42	62.01	2.925	7.75	0.094	0	7.75	0.123	21.133	1.903	0.217	0.192	0.013	0	0.95	0	0	0.012	1.214	80.9767	13.7568	0.0849532	5.18153	not readily biodegradable	0.858976	0.775396	0.868475	0.918311	0.30699	-0.811482	1.44894
morpholinium	C849_A67	0.064	244.45	197.65	2.652	8.583	0.065	0	9.25	0.262	24.09	1.92	0.228	0.257	0.057	0	1.064	0	0	0.006	0.863	78.4768	16.309	0.0431629	5.1711	not readily biodegradable	0.716765	0.723268	0.680748	0.967687	0.313096	-0.968724	0.862998
morpholinium	C849_A69	0.064	244.45	180.15	8.406	8.583	0.065	0.529	9.25	0.262	24.09	1.92	0.228	0.257	0.052	0.125	1.064	0	0	0.006	2.21	78.2348	16.2587	0.386391	5.12009	not readily biodegradable	0.242816	0.900454	0.570765	0.967687	0.311669	-0.660503	0.962917
pyridinium	C210_A64	0.027	178.33	132.08	11.425	6.283	0.045	0.344	7.167	0.11	18.026	1.913	0.241	0.231	0.243	0.131	0.552	0	0	0.011	2.425	87.6107	7.36425	0.00363123	5.02144	not readily biodegradable	0.71207	0.514556	0.69123	0.745926	0.284719	0.102112	1.34918
pyrrolidinium	C161_A57	0.038	198.42	96.07	4.388	7.75	0.102	0.517	7.75	0.319	21.133	1.903	0.224	0.169	0.208	0	0.964	0	0	0.008	1.303	79.9349	13.9201	1.13871	5.00633	not readily biodegradable	0.82766	0.985965	0.662213	0.924375	0.302572	-0.930139	1.49312
pyrrolidinium	C172_A66	0.035	212.45	135.11	14.945	8.25	0.1	0.139	8.25	0.177	22.66	1.91	0.209	0.209	-0.172	0.133	0.969	0	0	0.007	2.622	80.4626	14.1364	0.395648	5.00535	not readily biodegradable	0.22635	0.900098	0.507655	0.92654	0.301185	-1.57515	1.16291
piperazinium	C862_A32	0.037	115.23	75.05	7.162	4.2	0.086	0.022	4.333	0	11.467	1.929	0.207	0.181	-0.094	0.186	0.002	0	0	0.005	5.3729	92.1434	2.92918	0.000813305	4.92658	not readily biodegradable	0.264219	0.389703	0.699451	0.507706	0.271179	-0.523931	2.0773
morpholinium	C849_A14	0.064	244.45	58.09	1.345	8.583	0.065	0	9.25	0.262	24.09	1.92	0.228	0.257	0.014	0	1.064	1	0	0.006	1.2517	78.7113	16.3577	0.0432918	4.88776	not readily biodegradable	0.579999	0.723268	0.70573	0.967687	0.300824	-0.779028	0.534892
morpholinium	C849_A55	0.064	244.45	62.01	2.925	8.583	0.065	0	9.25	0.262	24.09	1.92	0.228	0.257	0.013	0	1.064	0	0	0.006	1.214	78.7166	16.3588	0.0432948	4.88127	not readily biodegradable	0.593264	0.723268	0.67553	0.967687	0.300539	-0.304913	0.781882
piperazinium	C868_A62	0.023	199.41	121.12	10.465	7.2	0.09	0	7.333	0.46	20.628	1.959	0.22	0.194	0.308	0.085	0.873	0	0	0.005	2.513	82.8117	12.278	0.0348216	4.87547	not readily biodegradable	0.447295	0.701593	0.415217	0.88496	0.290052	-1.43523	1.22728
piperazinium	C868_A27	0.023	199.41	59.05	6.313	7.2	0.09	0.027	7.333	0.46	20.628	1.959	0.22	0.194	0.292	0	0.873	0	0	0.005	2.801	82.9	12.2911	0.0389911	4.7699	not readily biodegradable	0.345961	0.710636	0.494579	0.88496	0.285486	-1.152	1.17998
piperazinium	C379_A32	0.034	144.28	75.05	7.162	4.833	0.068	0.022	5.75	0	14.015	1.866	0.233	0.202	-0.094	0.186	0.348	0	0	0.004	5.3729	89.9717	5.27286	0.000614226	4.75482	not readily biodegradable	0.0352597	0.368966	0.678429	0.657568	0.268952	-0.482282	1.74998
piperazinium	C868_A49	0.023	199.41	95.11	7.497	7.2	0.09	0.538	7.333	0.46	20.628	1.959	0.22	0.194	0.291	0	0.873	0	0	0.005	1.258	82.6693	12.2569	0.324024	4.74977	not readily biodegradable	0.888872	0.881793	0.471948	0.88496	0.2852	-1.16101	1.28459
piperazinium	C867_A33	0.025	185.38	45.02	2.927	6.7	0.088	0	6.833	0.357	19.101	1.956	0.2	0.18	-0.03	0	0.771	0	0	0.007	1.42	84.7611	10.4934	0.0170666	4.72848	not readily biodegradable	0.969086	0.642149	0.650852	0.840781	0.279404	-0.812341	1.38758
piperazinium	C868_A53	0.023	199.41	111.11	8.56	7.2	0.09	0.455	7.333	0.46	20.628	1.959	0.22	0.194	0.286	0.163	0.873	0	0	0.005	1.673	82.7758	12.2727	0.229917	4.72165	not readily biodegradable	0.742853	0.853993	0.451629	0.88496	0.283773	-1.14896	1.33897
piperidinium	C281_A7	0.038	198.42	149.08	7.722	7.75	0.094	0.609	7.75	0.123	21.133	1.903	0.217	0.192	-0.055	0	0.95	0	0	0.012	2.254	80.5695	13.6876	1.05781	4.68505	not readily biodegradable	0.493047	0.979377	0.776784	0.918311	0.287582	-1.02417	1.60685
morpholinium	C849_A33	0.064	244.45	45.02	2.927	8.583	0.065	0	9.25	0.262	24.09	1.92	0.228	0.257	-0.03	0	1.064	0	0	0.006	1.42	78.9441	16.4061	0.0434199	4.60634	not readily biodegradable	0.520782	0.723268	0.675491	0.967687	0.288266	-0.575722	0.596182
piperazinium	C867_A7	0.025	185.38	149.08	7.722	6.7	0.088	0.609	6.833	0.357	19.101	1.956	0.2	0.18	-0.055	0	0.771	0	0	0.007	2.254	84.7393	10.4907	0.213528	4.55647	not readily biodegradable	0.675639	0.84613	0.559199	0.840781	0.272269	-0.754224	1.73119
imidazolium	C392_A4	0.138	295.37	125.14	10.406	7.433	0.064	0.416	10.167	0.34	25.971	2.131	0.182	0.194	0.562	0.13	0.858	0	0	0.011	2	83.3821	12.039	0.0583541	4.52052	not readily biodegradable	0.147682	0.742716	0.600157	0.878463	0.273854	2.5773	-0.261541
pyrrolidinium	C163_A70	0.033	226.48	120.17	11.655	8.75	0.105	0.092	8.75	0.435	24.187	1.915	0.225	0.202	0.109	0.13	1.108	0	2	0.005	1.852	77.3436	17.3737	0.777518	4.50518	not readily biodegradable	0.360064	0.957825	0.404487	0.986745	0.287923	-1.69771	0.949557
piperazinium	C868_A63	0.023	199.41	87.06	8.284	7.2	0.09	0.482	7.333	0.46	20.628	1.959	0.22	0.194	0.245	0.152	0.873	0	0	0.005	1.495	82.9816	12.3032	0.257812	4.45738	not readily biodegradable	0.805483	0.863036	0.456905	0.88496	0.272071	-1.18457	1.24856
piperazinium	C868_A64	0.023	199.41	132.08	11.425	7.2	0.09	0.344	7.333	0.46	20.628	1.959	0.22	0.194	0.243	0.131	0.873	0	0	0.005	2.425	83.086	12.3187	0.145604	4.44975	not readily biodegradable	0.478258	0.816814	0.396867	0.88496	0.271501	-1.27405	1.34037
morpholinium	C849_A7	0.064	244.45	149.08	7.722	8.583	0.065	0.609	9.25	0.262	24.09	1.92	0.228	0.257	-0.055	0	1.064	0	0	0.006	2.254	78.6793	16.3511	0.541561	4.42809	not readily biodegradable	0.227335	0.927249	0.583839	0.967687	0.281131	-0.517605	0.939796
pyrrolidinium	C163_A56	0.033	226.48	90.07	5.196	8.75	0.105	0	8.75	0.435	24.187	1.915	0.225	0.202	0.064	0.116	1.108	0	3	0.005	2.146	77.7573	17.4667	0.533634	4.24239	not readily biodegradable	0.256619	0.92701	0.527946	0.986745	0.27508	-1.54587	0.933806
pyridinium	C210_A79	0.027	178.33	200.73	4.223	6.283	0.045	0.575	7.167	0.11	18.026	1.913	0.241	0.231	0.124	0	0.552	0	0	0.011	3.5528	88.3303	7.42474	0.00954704	4.23542	not readily biodegradable	0.315248	0.591928	0.82889	0.745926	0.250756	0.115475	1.56348
piperazinium	C868_A57	0.023	199.41	96.07	4.388	7.2	0.09	0.517	7.333	0.46	20.628	1.959	0.22	0.194	0.208	0	0.873	0	0	0.005	1.303	83.1484	12.3279	0.298707	4.22495	not readily biodegradable	0.873039	0.874759	0.531374	0.88496	0.261511	-0.770156	1.48134
pyrrolidinium	C163_A67	0.033	226.48	197.65	2.652	8.75	0.105	0	8.75	0.435	24.187	1.915	0.225	0.202	0.057	0	1.108	0	0	0.005	0.863	77.7913	17.4743	0.533867	4.20057	not readily biodegradable	0.708049	0.92701	0.576572	0.986745	0.273082	-1.61829	1.22333
piperazinium	C863_A17	0.034	129.26	301.01	23.151	4.7	0.085	0.771	4.833	0	12.994	1.937	0.208	0.219	-0.296	0.087	0.002	0	0	0.006	4.88	92.8414	2.95137	0.0321793	4.17503	not readily biodegradable	0.300435	0.685994	0.414856	0.507706	0.239162	-0.838219	2.53863
pyridinium	C210_A70	0.027	178.33	120.17	11.655	6.283	0.045	0.092	7.167	0.11	18.026	1.913	0.241	0.231	0.109	0.13	0.552	0	2	0.011	1.852	88.4245	7.43266	0.00128815	4.14151	not readily biodegradable	0.913683	0.43015	0.686834	0.745926	0.246475	-0.0185712	1.2533
pyrrolidinium	C161_A69	0.038	198.42	180.15	8.406	7.75	0.102	0.529	7.75	0.319	21.133	1.903	0.224	0.169	0.052	0.125	0.964	0	0	0.008	2.21	80.7105	14.0551	1.20846	4.02587	not readily biodegradable	0.508528	0.989984	0.585412	0.924375	0.258049	-1.16707	1.62997
pyrrolidinium	C163_A14	0.033	226.48	58.09	1.345	8.75	0.105	0	8.75	0.435	24.187	1.915	0.225	0.202	0.014	0	1.108	1	0	0.005	1.2517	77.9961	17.5203	0.535273	3.94836	not readily biodegradable	0.571283	0.92701	0.601555	0.986745	0.26081	-1.42859	0.895225
pyrrolidinium	C163_A55	0.033	226.48	62.01	2.925	8.75	0.105	0	8.75	0.435	24.187	1.915	0.225	0.202	0.013	0	1.108	0	0	0.005	1.214	78.0008	17.5213	0.535305	3.94259	not readily biodegradable	0.584548	0.92701	0.571354	0.986745	0.260524	-0.954475	1.14222
pyridinium	C210_A56	0.027	178.33	90.07	5.196	6.283	0.045	0	7.167	0.11	18.026	1.913	0.241	0.231	0.064	0.116	0.552	0	3	0.011	2.146	88.6798	7.45412	0.00088193	3.86518	not readily biodegradable	0.810237	0.399335	0.810292	0.745926	0.233631	0.133271	1.23755
piperazinium	C867_A66	0.025	185.38	135.11	14.945	6.7	0.088	0.139	6.833	0.357	19.101	1.956	0.2	0.18	-0.172	0.133	0.771	0	0	0.007	2.622	85.5391	10.5897	0.0306615	3.84049	not readily biodegradable	0.546157	0.688707	0.421137	0.840781	0.238876	-1.24604	1.44502
pyrrolidinium	C161_A55	0.038	198.42	62.01	2.925	7.75	0.102	0	7.75	0.319	21.133	1.903	0.224	0.169	0.013	0	0.964	0	0	0.008	1.214	81.7821	14.2418	0.136365	3.83977	not readily biodegradable	0.858976	0.812799	0.690177	0.924375	0.246918	-0.811482	1.44894
piperazinium	C379_A24	0.034	144.28	152.03	12.595	4.833	0.068	0.531	5.75	0	14.015	1.866	0.233	0.202	-0.242	0.159	0.348	0	0	0.004	2.718	90.8636	5.32513	0.00512661	3.80616	not readily biodegradable	0.969399	0.539452	0.574581	0.657568	0.226712	-0.189237	2.12818
pyridinium	C210_A69	0.027	178.33	180.15	8.406	6.283	0.045	0.529	7.167	0.11	18.026	1.913	0.241	0.231	0.052	0.125	0.552	0	0	0.011	2.21	88.74	7.45918	0.00792477	3.79285	not readily biodegradable	0.787719	0.57652	0.748936	0.745926	0.230206	0.369073	1.627
piperazinium	C863_A3	0.034	129.26	280.17	17.864	4.7	0.085	0.792	4.833	0	12.994	1.937	0.208	0.219	-0.358	0.071	0.002	0	2	0.006	4.087	93.2144	2.96323	0.03525	3.78708	not readily biodegradable	0.579455	0.693028	0.515913	0.507706	0.221467	-0.803086	2.49301
piperidinium	C260_A24	0.038	198.42	152.03	12.595	7.75	0.1	0.531	7.75	0.276	21.133	1.903	0.224	0.231	-0.242	0.159	0.954	0	0	0.008	2.718	81.2422	13.8998	1.0924	3.76561	not readily biodegradable	0.329786	0.981303	0.526011	0.920043	0.244586	-0.990386	1.63253
morpholinium	C849_A66	0.064	244.45	135.11	14.945	8.583	0.065	0.139	9.25	0.262	24.09	1.92	0.228	0.257	-0.172	0.133	1.064	0	0	0.006	2.622	79.6203	16.5466	0.0779598	3.75518	not readily biodegradable	0.0978522	0.769825	0.445777	0.967687	0.247738	-1.00942	0.653626
piperazinium	C868_A79	0.023	199.41	200.73	4.223	7.2	0.09	0.575	7.333	0.46	20.628	1.959	0.22	0.194	0.124	0	0.873	0	0	0.005	3.5528	83.5147	12.3822	0.381654	3.72146	not readily biodegradable	0.0814361	0.894186	0.534528	0.88496	0.237537	-1.26069	1.55467
pyrrolidinium	C163_A33	0.033	226.48	45.02	2.927	8.75	0.105	0	8.75	0.435	24.187	1.915	0.225	0.202	-0.03	0	1.108	0	0	0.005	1.42	78.1989	17.5659	0.536665	3.69857	not readily biodegradable	0.512065	0.92701	0.571316	0.986745	0.248252	-1.22528	0.956515
piperazinium	C868_A70	0.023	199.41	120.17	11.655	7.2	0.09	0.092	7.333	0.46	20.628	1.959	0.22	0.194	0.109	0.13	0.873	0	2	0.005	1.852	83.8664	12.4344	0.051657	3.64759	not readily biodegradable	0.679871	0.732408	0.392471	0.88496	0.233256	-1.39473	1.24449
piperidinium	C281_A24	0.038	198.42	152.03	12.595	7.75	0.094	0.531	7.75	0.123	21.133	1.903	0.217	0.192	-0.242	0.159	0.95	0	0	0.012	2.718	81.7585	13.8896	0.77663	3.57528	not readily biodegradable	0.329786	0.953252	0.68364	0.918311	0.234211	-0.990386	1.63253
imidazolium	C392_A65	0.138	295.37	124.16	12.137	7.433	0.064	0.435	10.167	0.34	25.971	2.131	0.182	0.194	0.403	0.12	0.858	0	1	0.011	1.98	84.2135	12.1591	0.0637702	3.5637	not readily biodegradable	0.154719	0.74908	0.56707	0.878463	0.228474	2.5236	-0.291139
morpholinium	C842_A57	0.055	214.42	96.07	4.388	7.917	0.078	0.517	8.25	0.338	21.848	1.91	0.242	0.195	0.208	0	1.017	0	0	0.006	1.303	80.6955	15.4329	0.352263	3.5193	not readily biodegradable	0.763412	0.890489	0.611036	0.94733	0.233737	-0.627979	1.22988
piperazinium	C379_A17	0.034	144.28	301.01	23.151	4.833	0.068	0.771	5.75	0	14.015	1.866	0.233	0.202	-0.296	0.087	0.348	0	0	0.004	4.88	91.1575	5.34236	0.0139224	3.48622	not readily biodegradable	0.208689	0.619839	0.372812	0.657568	0.2113	-0.672908	2.33899
piperazinium	C867_A24	0.025	185.38	152.03	12.595	6.7	0.088	0.531	6.833	0.357	19.101	1.956	0.2	0.18	-0.242	0.159	0.771	0	0	0.007	2.718	85.7897	10.6208	0.156404	3.43311	not readily biodegradable	0.512378	0.820005	0.466055	0.840781	0.218898	-0.720437	1.75687
piperazinium	C868_A56	0.023	199.41	90.07	5.196	7.2	0.09	0	7.333	0.46	20.628	1.959	0.22	0.194	0.064	0.116	0.873	0	3	0.005	2.146	84.1	12.469	0.0353633	3.39569	not readily biodegradable	0.576425	0.701593	0.51593	0.88496	0.220413	-1.24289	1.22874
morpholinium	C849_A24	0.064	244.45	152.03	12.595	8.583	0.065	0.531	9.25	0.262	24.09	1.92	0.228	0.257	-0.242	0.159	1.064	0	0	0.006	2.718	79.6849	16.56	0.396833	3.3582	not readily biodegradable	0.0640741	0.901123	0.490695	0.967687	0.22776	-0.483818	0.965476
piperazinium	C868_A69	0.023	199.41	180.15	8.406	7.2	0.09	0.529	7.333	0.46	20.628	1.959	0.22	0.194	0.052	0.125	0.873	0	0	0.005	2.21	83.9203	12.4423	0.316871	3.32053	not readily biodegradable	0.553907	0.878778	0.454573	0.88496	0.216988	-1.00709	1.61818
piperazinium	C379_A3	0.034	144.28	280.17	17.864	4.833	0.068	0.792	5.75	0	14.015	1.866	0.233	0.202	-0.358	0.071	0.348	0	2	0.004	4.087	91.4865	5.36164	0.0152447	3.1366	not readily biodegradable	0.48771	0.626873	0.473869	0.657568	0.193604	-0.637775	2.29337
piperazinium	C868_A14	0.023	199.41	58.09	1.345	7.2	0.09	0	7.333	0.46	20.628	1.959	0.22	0.194	0.014	0	0.873	1	0	0.005	1.2517	84.3348	12.5038	0.0354621	3.1259	not readily biodegradable	0.891089	0.701593	0.589538	0.88496	0.206143	-1.12561	1.19016
piperazinium	C868_A55	0.023	199.41	62.01	2.925	7.2	0.09	0	7.333	0.46	20.628	1.959	0.22	0.194	0.013	0	0.873	0	0	0.005	1.214	84.3394	12.5045	0.035464	3.12062	not readily biodegradable	0.904354	0.701593	0.559338	0.88496	0.205857	-0.651499	1.43715
imidazolium	C392_A49	0.138	295.37	95.11	7.497	7.433	0.064	0.538	10.167	0.34	25.971	2.131	0.182	0.194	0.291	0	0.858	0	0	0.011	1.258	84.7125	12.2311	0.0983535	2.95802	not readily biodegradable	0.408758	0.783579	0.65576	0.878463	0.196509	2.71008	-0.286535
pyrrolidinium	C163_A66	0.033	226.48	135.11	14.945	8.75	0.105	0.139	8.75	0.435	24.187	1.915	0.225	0.202	-0.172	0.133	1.108	0	0	0.005	2.622	78.4762	17.6281	0.958778	2.93694	not readily biodegradable	0.0891359	0.973567	0.341601	0.986745	0.207724	-1.65898	1.01396
imidazolium	C392_A53	0.138	295.37	111.11	8.56	7.433	0.064	0.455	10.167	0.34	25.971	2.131	0.182	0.194	0.286	0.163	0.858	0	0	0.011	1.673	84.7592	12.2379	0.069737	2.9332	not readily biodegradable	0.262738	0.755779	0.635442	0.878463	0.195082	2.72213	-0.232157
piperazinium	C868_A33	0.023	199.41	45.02	2.927	7.2	0.09	0	7.333	0.46	20.628	1.959	0.22	0.194	-0.03	0	0.873	0	0	0.005	1.42	84.5334	12.5332	0.0355456	2.89785	not readily biodegradable	0.831872	0.701593	0.5593	0.88496	0.193585	-0.922308	1.25145
piperazinium	C867_A3	0.025	185.38	280.17	17.864	6.7	0.088	0.792	6.833	0.357	19.101	1.956	0.2	0.18	-0.358	0.071	0.771	0	2	0.007	4.087	86.0736	10.6559	0.463452	2.80705	not readily biodegradable	0.0306892	0.907425	0.365343	0.840781	0.185791	-1.16897	1.92206
piperazinium	C868_A7	0.023	199.41	149.08	7.722	7.2	0.09	0.609	7.333	0.46	20.628	1.959	0.22	0.194	-0.055	0	0.873	0	0	0.005	2.254	84.2973	12.4982	0.443597	2.76086	not readily biodegradable	0.538425	0.905574	0.467647	0.88496	0.186449	-0.864191	1.59506
imidazolium	C392_A63	0.138	295.37	87.06	8.284	7.433	0.064	0.482	10.167	0.34	25.971	2.131	0.182	0.194	0.245	0.152	0.858	0	0	0.011	1.495	84.9322	12.2628	0.0781633	2.72678	not readily biodegradable	0.325369	0.764822	0.640717	0.878463	0.18338	2.68652	-0.322571
pyrrolidinium	C162_A28	0.035	212.45	171.21	14.741	8.25	0.103	0.297	8.25	0.423	22.66	1.91	0.266	0.176	0.547	0.09	1.061	0	0	0.007	3.092	79.8694	16.5106	0.900059	2.71993	not readily biodegradable	0.0609782	0.967045	0.393313	0.966388	0.192542	-1.77758	1.17173
morpholinium	C842_A69	0.055	214.42	180.15	8.406	7.917	0.078	0.529	8.25	0.338	21.848	1.91	0.242	0.195	0.052	0.125	1.017	0	0	0.006	2.21	81.3553	15.5591	0.373274	2.71233	not readily biodegradable	0.444279	0.894508	0.534235	0.94733	0.189214	-0.864912	1.36673
pyridinium	C210_A66	0.027	178.33	135.11	14.945	6.283	0.045	0.139	7.167	0.11	18.026	1.913	0.241	0.231	-0.172	0.133	0.552	0	0	0.011	2.622	89.8709	7.55424	0.00159113	2.5733	not readily biodegradable	0.642754	0.445892	0.623948	0.745926	0.166275	0.0201583	1.31771
imidazolium	C392_A57	0.138	295.37	96.07	4.388	7.433	0.064	0.517	10.167	0.34	25.971	2.131	0.182	0.194	0.208	0	0.858	0	0	0.011	1.303	85.0786	12.284	0.0905358	2.54694	not readily biodegradable	0.392925	0.776545	0.715186	0.878463	0.17282	3.10093	-0.0897918
morpholinium	C842_A55	0.055	214.42	62.01	2.925	7.917	0.078	0	8.25	0.338	21.848	1.91	0.242	0.195	0.013	0	1.017	0	0	0.006	1.214	81.7817	15.6407	0.0417869	2.53581	not readily biodegradable	0.794727	0.717323	0.639	0.94733	0.178083	-0.509322	1.18569
pyrrolidinium	C161_A24	0.038	198.42	152.03	12.595	7.75	0.102	0.531	7.75	0.319	21.133	1.903	0.224	0.169	-0.242	0.159	0.964	0	0	0.008	2.718	82.0047	14.2805	1.23807	2.47677	not readily biodegradable	0.329786	0.990654	0.505343	0.924375	0.174139	-0.990386	1.63253
piperazinium	C868_A66	0.023	199.41	135.11	14.945	7.2	0.09	0.139	7.333	0.46	20.628	1.959	0.22	0.194	-0.172	0.133	0.873	0	0	0.005	2.622	85.0985	12.617	0.0637026	2.22081	not readily biodegradable	0.408943	0.74815	0.329585	0.88496	0.153057	-1.356	1.30889
morpholinium	C842_A7	0.055	214.42	149.08	7.722	7.917	0.078	0.609	8.25	0.338	21.848	1.91	0.242	0.195	-0.055	0	1.017	0	0	0.006	2.254	81.6458	15.6147	0.522079	2.21746	not readily biodegradable	0.428798	0.921304	0.547309	0.94733	0.158675	-0.722013	1.34361
imidazolium	C392_A70	0.138	295.37	120.17	11.655	7.433	0.064	0.092	10.167	0.34	25.971	2.131	0.182	0.194	0.109	0.13	0.858	0	2	0.011	1.852	85.5359	12.35	0.0156062	2.09855	not readily biodegradable	0.199756	0.634194	0.576283	0.878463	0.144565	2.47636	-0.326638
pyrrolidinium	C162_A54	0.035	212.45	162.16	11.879	8.25	0.103	0.311	8.25	0.423	22.66	1.91	0.266	0.176	0.4	0.091	1.061	1	1	0.007	2.792	80.3665	16.6133	0.959827	2.06036	not readily biodegradable	0.166535	0.971734	0.448018	0.966388	0.150587	-1.61434	1.22531
piperazinium	C868_A24	0.023	199.41	152.03	12.595	7.2	0.09	0.531	7.333	0.46	20.628	1.959	0.22	0.194	-0.242	0.159	0.873	0	0	0.005	2.718	85.1373	12.6228	0.324145	1.91579	not readily biodegradable	0.375164	0.879448	0.374503	0.88496	0.133078	-0.830403	1.62074
imidazolium	C392_A56	0.138	295.37	90.07	5.196	7.433	0.064	0	10.167	0.34	25.971	2.131	0.182	0.194	0.064	0.116	0.858	0	3	0.011	2.146	85.7062	12.3746	0.0106753	1.90855	not readily biodegradable	0.0963112	0.603379	0.699742	0.878463	0.131721	2.6282	-0.342389
imidazolium	C392_A67	0.138	295.37	197.65	2.652	7.433	0.064	0	10.167	0.34	25.971	2.131	0.182	0.194	0.057	0	0.858	0	0	0.011	0.863	85.7313	12.3782	0.0106784	1.87979	not readily biodegradable	0.547741	0.603379	0.748369	0.878463	0.129724	2.55578	-0.0528644
imidazolium	C392_A69	0.138	295.37	180.15	8.406	7.433	0.064	0.529	10.167	0.34	25.971	2.131	0.182	0.194	0.052	0.125	0.858	0	0	0.011	2.21	85.6761	12.3702	0.0958261	1.85781	not readily biodegradable	0.0737924	0.780564	0.638386	0.878463	0.128297	2.864	0.0470546
pyridinium	C210_A3	0.027	178.33	280.17	17.864	6.283	0.045	0.792	7.167	0.11	18.026	1.913	0.241	0.231	-0.358	0.071	0.552	0	2	0.011	4.087	90.6185	7.61708	0.0240996	1.74027	not readily biodegradable	0.127287	0.664611	0.568153	0.745926	0.11319	0.0972215	1.79475
imidazolium	C392_A14	0.138	295.37	58.09	1.345	7.433	0.064	0	10.167	0.34	25.971	2.131	0.182	0.194	0.014	0	0.858	1	0	0.011	1.2517	85.8814	12.3999	0.0106971	1.70798	not readily biodegradable	0.410975	0.603379	0.773351	0.878463	0.117451	2.74548	-0.38097
pyrrolidinium	C162_A62	0.035	212.45	121.12	10.465	8.25	0.103	0	8.25	0.423	22.66	1.91	0.266	0.176	0.308	0.085	1.061	0	0	0.007	2.513	81.2332	16.7925	0.26695	1.70731	not readily biodegradable	0.264702	0.867567	0.475046	0.966388	0.12433	-1.65438	1.0813
imidazolium	C392_A55	0.138	295.37	62.01	2.925	7.433	0.064	0	10.167	0.34	25.971	2.131	0.182	0.194	0.013	0	0.858	0	0	0.011	1.214	85.8848	12.4004	0.0106975	1.70409	not readily biodegradable	0.42424	0.603379	0.743151	0.878463	0.117166	3.21959	-0.13398
pyrrolidinium	C162_A27	0.035	212.45	59.05	6.313	8.25	0.103	0.027	8.25	0.423	22.66	1.91	0.266	0.176	0.292	0	1.061	0	0	0.007	2.801	81.2573	16.7975	0.298684	1.64658	not readily biodegradable	0.163368	0.87661	0.554408	0.966388	0.119763	-1.37115	1.034
imidazolium	C392_A33	0.138	295.37	45.02	2.927	7.433	0.064	0	10.167	0.34	25.971	2.131	0.182	0.194	-0.03	0	0.858	0	0	0.011	1.42	86.0275	12.421	0.0107153	1.54076	not readily biodegradable	0.351758	0.603379	0.743112	0.878463	0.104893	2.94878	-0.319681
morpholinium	C842_A24	0.055	214.42	152.03	12.595	7.917	0.078	0.531	8.25	0.338	21.848	1.91	0.242	0.195	-0.242	0.159	1.017	0	0	0.006	2.718	82.3826	15.7556	0.381138	1.48067	not readily biodegradable	0.265537	0.895178	0.454166	0.94733	0.105304	-0.688226	1.36929
pyrrolidinium	C162_A64	0.035	212.45	132.08	11.425	8.25	0.103	0.344	8.25	0.423	22.66	1.91	0.266	0.176	0.243	0.131	1.061	0	0	0.007	2.425	80.7454	16.6917	1.10586	1.45712	not readily biodegradable	0.295665	0.982788	0.456696	0.966388	0.105778	-1.4932	1.19439
imidazolium	C392_A7	0.138	295.37	149.08	7.722	7.433	0.064	0.609	10.167	0.34	25.971	2.131	0.182	0.194	-0.055	0	0.858	0	0	0.011	2.254	86.001	12.4171	0.134056	1.44782	not readily biodegradable	0.0583108	0.80736	0.65146	0.878463	0.097758	3.0069	0.0239334
piperazinium	C876_A68	0.053	227.47	153.11	17.981	8.95	0.083	0.463	9.083	0.325	23.681	1.881	0.321	0.204	0.833	0.091	1.064	0	0	0.006	2.518	80.667	16.7641	1.35506	1.2138	not readily biodegradable	0.171197	0.99927	0.357465	0.967687	0.0853419	-1.67924	0.993021
pyrrolidinium	C162_A70	0.035	212.45	120.17	11.655	8.25	0.103	0.092	8.25	0.423	22.66	1.91	0.266	0.176	0.109	0.13	1.061	0	2	0.007	1.852	81.6861	16.8861	0.393213	1.03456	not readily biodegradable	0.497278	0.898382	0.4523	0.966388	0.0675337	-1.61388	1.09851
pyrrolidinium	C162_A56	0.035	212.45	90.07	5.196	8.25	0.103	0	8.25	0.423	22.66	1.91	0.266	0.176	0.064	0.116	1.061	0	3	0.007	2.146	81.8944	16.9292	0.269123	0.907298	not readily biodegradable	0.393833	0.867567	0.575759	0.966388	0.0546904	-1.46204	1.08276
pyrrolidinium	C162_A67	0.035	212.45	197.65	2.652	8.25	0.103	0	8.25	0.423	22.66	1.91	0.266	0.176	0.057	0	1.061	0	0	0.007	0.863	81.9103	16.9325	0.269175	0.888071	not readily biodegradable	0.845263	0.867567	0.624385	0.966388	0.0526925	-1.53446	1.37229
pyrrolidinium	C162_A14	0.035	212.45	58.09	1.345	8.25	0.103	0	8.25	0.423	22.66	1.91	0.266	0.176	0.014	0	1.061	1	0	0.007	1.2517	82.0041	16.9519	0.269483	0.774502	not readily biodegradable	0.708497	0.867567	0.649367	0.966388	0.04042	-1.34476	1.04418
pyrrolidinium	C162_A55	0.035	212.45	62.01	2.925	8.25	0.103	0	8.25	0.423	22.66	1.91	0.266	0.176	0.013	0	1.061	0	0	0.007	1.214	82.0062	16.9523	0.26949	0.771954	not readily biodegradable	0.721762	0.867567	0.619167	0.966388	0.0401346	-0.870649	1.29117
pyrrolidinium	C162_A33	0.035	212.45	45.02	2.927	8.25	0.103	0	8.25	0.423	22.66	1.91	0.266	0.176	-0.03	0	1.061	0	0	0.007	1.42	82.0935	16.9703	0.269777	0.666369	not readily biodegradable	0.649279	0.867567	0.619129	0.966388	0.0278621	-1.14146	1.10547
piperazinium	C876_A4	0.053	227.47	125.14	10.406	8.95	0.083	0.416	9.083	0.325	23.681	1.881	0.321	0.204	0.562	0.13	1.064	0	0	0.006	2	81.442	16.9252	1.12568	0.507116	not readily biodegradable	0.353458	0.983528	0.502255	0.967687	0.00799677	-1.46292	1.01569
The explanations of abbreviations of descriptors applied in the MM modeling
MATS1m_C	Moran autocorrelation of lag 1 weighted by mass calculated for cation
MW_C	molecular weight of cation
MW_A	molecular weight of anion
HTi_A	H total index / weighted by ionization potential calculated for anion
ON0V_C	overall modified Zagreb index of order 0 by valence vertex degrees calculated for cation
X5Av_C	average valence connectivity index of order 5 calculated for cation
L3m_A	3rd component size directional WHIM index / weighted by mass calculated for anion
ON0_C	overall modified Zagreb index of order 0 calculated for cation
H8e_C	H autocorrelation of lag 8 / weighted by Sanderson electronegativity calculated for cation
Sv_C	sum of atomic van der Waals volumes (scaled on Carbon atom) calculated for cation
GNar_C	Narumi geometric topological index calculated for cation
G2u_C	2nd component symmetry directional WHIM index / unweighted calculated for cation
G3u_C	3rd component symmetry directional WHIM index / unweighted calculated for cation
Mor19u_A	signal 19 / unweighted calculated for anion
R4u+_A	R maximal autocorrelation of lag 4 / unweighted calculated for anion
SpMin6_Bh(i)_C	smallest eigenvalue n. 6 of Burden matrix weighted by ionization potential calculated for cation
C-040_A	R-C(=X)-X / R-C#X / X=C=X calculated for anion
F02[C-N]_A	Frequency of C - N at topological distance 2 calculated for anion
R7p+_C	R maximal autocorrelation of lag 7 / weighted by polarizability calculated for cation
J_B(p)_A	Balaban-like index from Burden matrix weighted by polarizability calculated for anion
[Ref 1]	A. Mauri, V. Consonni, M. Pavan and R. Todeschini, Match-Commun Math Co, 2006, 56, 237-248
